# Supplementary material for: Quantitative Proteomic Analysis of Human Seminal Plasma from Normozoospermic and Asthenozoospermic Individuals
Source: Biomed Res Int. 2019 Mar 10;2019:2735038. doi: 10.1155/2019/2735038 (PMC6431472; doi:10.1155/2019/2735038)
Supplement: Supplementary 6 — Supplementary Data 1. Sample information for proteomic and Western blotting analyses. [file 2735038.f6.xlsx]

## Sheet: samples for proteomics
Group	Sample	Volume (ml)	Sperm concentration (1E6/ml)	Total sperm count (1E6)	Forward motility (%)	Age	Appearance	Time of the seminal liquefaction	Viscosity	pH	α-Glucosidase of seminal plasma (U/L)	Zinc of seminal plasma (umol/L)	Fructose of seminal plasma(umol/L)	Citric acid of seminal plasma(umol/L)
Normozoospermia	N1	3.5	51	178.5	76	31	offwhite	<30min	Normal	7.5	125.9	3473	10437	16920
Normozoospermia	N2	3	101	303	65	26	offwhite	<30min	Normal	7.6	368.3	5304	10097	18434
Normozoospermia	N3	4.5	73	328.5	64	26	offwhite	<30min	Normal	7.2	402.4	1243	9387	17054
Asthenozoospermia	A1	5	32	160	16	34	offwhite	<30min	Normal	7.5	255.7	827	8561	17543
Asthenozoospermia	A2	3	47	141	20	22	offwhite	<30min	Normal	7.3	169.2	2685	11673	17008
Asthenozoospermia	A3	3.5	22	77	17	35	offwhite	<30min	Normal	7.3	212.4	3009	10664	18347
											reference range (109.63-570.76)	reference range (764-7644)	reference range (>8330)	reference range (>15600)

## Sheet: samples for western (R1)
Group	Sample	Volume (ml)	Sperm concentration (1E6/ml)	Total sperm count (1E6)	Forward motility (%)	Age	Appearance	Time of the seminal liquefaction	Viscosity	pH	α-Glucosidase of seminal plasma (U/L)	Zinc of seminal plasma (umol/L)	Fructose of seminal plasma(umol/L)	Citric acid of seminal plasma(umol/L)
Normozoospermia	N4	3	27	81	71	24	offwhite	<30min	Normal	7.5	175.6	4720	9345	18452
Normozoospermia	N5	4	83	332	67	31	pale yellow	<30min	Normal	7.4	370.8	6232	11042	17703
Normozoospermia	N6	3.5	65	227.5	87	36	offwhite	<30min	Normal	7.1	159.3	2970	10743	19541
Asthenozoospermia	A4	4	58	232	21	35	offwhite	<30min	Normal	7.4	406.3	2862	8542	18003
Asthenozoospermia	A5	3	41	123	16	33	offwhite	<30min	Normal	7.5	288.5	1750	10552	16649
Asthenozoospermia	A6	3	90	270	19	27	offwhite	<30min	Normal	7.6	200.2	3004	9032	17202
											reference range (109.63-570.76)	reference range (764-7644)	reference range (>8330)	reference range (>15600)

## Sheet: samples for western (R2)
Group	Sample	Volume (ml)	Sperm concentration (1E6/ml)	Total sperm count (1E6)	Forward motility (%)	Age	Appearance	Time of the seminal liquefaction	Viscosity	pH	α-Glucosidase of seminal plasma (U/L)	Zinc of seminal plasma (umol/L)	Fructose of seminal plasma(umol/L)	Citric acid of seminal plasma(umol/L)
Normozoospermia	N7	2.5	32	80	83	34	offwhite	<30min	Normal	7.4	205.5	6246	17053	19875
Normozoospermia	N8	2.5	71	177.5	86	28	offwhite	<30min	Normal	7.2	194.6	3637	10664	19074
Normozoospermia	N9	3	64	192	71	31	offwhite	<30min	Normal	7.4	306.2	1865	9032	18563
Asthenozoospermia	A7	3.5	27	94.5	15	26	offwhite	<30min	Normal	7.4	273.6	3086	12417	17953
Asthenozoospermia	A8	3	39	117	20	26	offwhite	<30min	Normal	7.5	397.4	2066	9029	16424
Asthenozoospermia	A9	2.5	56	140	11	32	offwhite	<30min	Normal	7.2	208.4	1753	11535	18008
											reference range (109.63-570.76)	reference range (764-7644)	reference range (>8330)	reference range (>15600)
