# Supplementary material for: Quantitative Proteomic Analysis of Human Seminal Plasma from Normozoospermic and Asthenozoospermic Individuals
Source: Biomed Res Int. 2019 Mar 10;2019:2735038. doi: 10.1155/2019/2735038 (PMC6431472; doi:10.1155/2019/2735038)
Supplement: Supplementary 7 — Supplementary Data 2. Detailed information for all identified seminal plasma proteins (including basic proteomic identification results, quantification results, functional annotation, and dataset comparison for each protein). [file 2735038.f7.xlsx]

## Sheet: protein list of seminal plasma
>Proteimics identification	id	First protein ID	Entry	Gene name	Description	Peptide IDs	MS/MS IDs	Protein accessions	Peptides	Unique peptides	Single peptide	Sequence coverage [%]	Unique sequence coverage [%]	Mol. weight [kDa]	Sequence length	Score	Q-value	Unique peptides r1	Unique peptides r2	>Quantification	First protein ID	Core	Exp diff	Rep Diff	iBAQ	iBAQ r1	iBAQ r2	iBAQ (log)	iBAQ r1 (log)	iBAQ r2 (log)	Total spectra (r1)	Unique spectra (r1)	Filtered spectra (r1)	Libra sepctra (r1)	Total spectra (r2)	Unique spectra (r2)	Filtered spectra (r2)	Libra sepctra (r2)	First protein ID	AV E1 (r1)	AV E2 (r1)	AV E3 (r1)	AV N1 (r1)	AV N2 (r1)	AV N3 (r1)	AV E1 (r2)	AV E2 (r2)	AV E3 (r2)	AV N1 (r2)
>Proteimics identification	233	O75874	O75874	IDH1	Isocitrate dehydrogenase [NADP] cytoplasmic	132;231;265;281;588;750;806;1074;1078;1207;1271;1470;1474;1748	1625;1626;1627;1628;2047;2048;2049;2208;2209;2895;2896;2897;2903;324;325;3275;3465;3992;3993;3994;4001;4002;4003;4680;4681;4682;663;730;731;732;733;818;819	O75874	14	14	NO	36.7	36.7	46.659	414	195.85	0	12	12	>Quantification	O75874	O75874			2292100	1306700	985380	6.36023	6.11618	5.9936	17	17	17	13	16	16	16	14	O75874	0.157788	0.0704002	0.115628	0.111617	0.279962	0.264606	0.15912	0.0900365	0.0926492	0.127784
>Proteimics identification	496	Q96KP4	Q96KP4	CNDP2	Cytosolic non-specific dipeptidase	360;362;426;739;776;1133;1203;1218;1231;1387;1705;1880	1009;1176;1177;2022;2023;2142;3005;3006;3007;3262;3263;3313;3314;3343;3344;3764;3765;3766;4563;5049;5050;992;993	Q96KP4	12	12	NO	39.4	39.4	52.878	475	125.37	0	11	10	>Quantification	Q96KP4	Q96KP4			407890	217320	190570	5.61054	5.3371	5.28005	12	12	12	10	11	11	11	9	Q96KP4	0.141223	0.0552477	0.155334	0.143491	0.240109	0.264596	0.127929	0.0664063	0.14042	0.182863
>Proteimics identification	316	P12273	P12273	PIP	Prolactin-inducible protein	458;459;645;646;1580;1634;1708;1715;1955	1252;1253;1254;1255;1256;1257;1258;1259;1260;1261;1262;1263;1264;1265;1768;1769;1770;1771;1772;1773;1774;1775;4284;4285;4286;4287;4288;4289;4290;4395;4396;4397;4569;4570;4571;4572;4573;4574;4575;4592;4593;4594;4595;4596;4597;4598;4599;4600;4601;4602;4603;4604;4605;4606;4607;5220;5221;5222;5223	P12273	9	9	NO	65.8	65.8	16.572	146	116.72	0	9	8	>Quantification	P12273	P12273			236000000	132540000	103460000	8.37291	8.12235	8.01477	30	30	30	25	29	29	28	20	P12273	0.111276	0.139086	0.465975	0.112337	0.054724	0.0981515	0.11274	0.128361	0.508098	0.087102
>Proteimics identification	298	P08758	P08758	ANXA5	Annexin A5	83;296;320;511;724;787;1264;1357;1501	1427;1428;1429;1990;1991;1992;1993;204;205;2172;2173;3456;3663;3664;4090;4091;4092;4093;4094;4095;4096;849;850;899	P08758	9	9	NO	39.1	39.1	35.936	320	115.53	0	7	9	>Quantification	P08758	P08758			839910	402400	437510	5.92423	5.60466	5.64099	10	10	10	8	14	14	14	11	P08758	0.132241	0.0517082	0.113418	0.067093	0.296854	0.291174	0.133985	0.0562178	0.123384	0.061248
>Proteimics identification	367	P28907	P28907	CD38	ADP-ribosyl cyclase/cyclic ADP-ribose hydrolase 1	240;286;287;456;893;919;971;1428;1814	1249;1250;2456;2509;2510;2641;3872;3873;4887;4888;678;679;680;829;830;831;832;833	P28907	9	9	NO	25	25	34.328	300	67.37	0	7	8	>Quantification	P28907	P28907			1396400	653290	743130	6.14501	5.81511	5.87106	8	8	8	6	10	10	10	7	P28907	0.0885477	0.0685705	0.136399	0.0713461	0.332769	0.302368	0.0988996	0.0743551	0.147169	0.0833319
>Proteimics identification	49	A0A0G2JPA8	A0A0G2JPA8	SERPINF2	Alpha-2-antiplasmin	253;684;1353;1866	1882;1883;3653;3654;3655;5026;5027;706;707	A0A0G2JPA8;P08697-2;P08697	4	4	NO	13.1	13.1	47.936	427	80.908	0	4	4	>Quantification	A0A0G2JPA8	A0A0G2JPA8			289220	150840	138390	5.46123	5.17852	5.1411	5	5	5	5	4	4	4	4	A0A0G2JPA8	0.190963	0.182844	0.245786	0.153377	0.129363	0.0976663	0.199261	0.196811	0.222632	0.155282
>Proteimics identification	415	P54652	P54652	HSPA2	Heat shock-related 70 kDa protein 2	120;554;886;1118;1498;1620;1697;1733	1551;2437;2438;295;2976;2977;2978;2979;4080;4081;4373;4374;4540;4541;4647;4648	P54652	8	3	NO	14.9	7	70.02	639	43.417	0	3	3	>Quantification	P54652	P54652			66865	38029	28836	4.8252	4.58011	4.45994	8	3	3	3	8	3	3	3	P54652	0.338865	0.128742	0.326577	0.0290888	0.0909426	0.0857846	0.351902	0.109859	0.313479	0.0458341
>Proteimics identification	153	F5H245	F5H245	LDHC	L-lactate dehydrogenase	412;914;1413;1447;1769	1140;1141;1142;2500;2501;2502;3824;3825;3932;3933;3934;4727	F5H245;P07864	5	4	NO	18.2	14.5	34.805	318	29.973	0	4	3	>Quantification	F5H245	F5H245			366990	222960	144030	5.56465	5.34823	5.15845	8	7	7	5	4	4	4	4	F5H245	0.233249	0.109367	0.448401	0.0386132	0.0588698	0.111501	0.265679	0.0736429	0.487053	0.0162735
>Proteimics identification	284	P07355	P07355	ANXA2	Annexin A2	86;311;722;793;1577;1586	1983;1984;1985;211;2184;2185;2186;2187;4277;4300;883	P07355;P07355-2	6	6	NO	19.8	19.8	38.604	339	60.613	0	5	3	>Quantification	P07355	P07355			183360	108230	75124	5.2633	5.03435	4.87578	7	7	7	4	4	4	4	4	P07355	0.108733	0.0818873	0.130112	0.0847317	0.265959	0.328577	0.104493	0.0405435	0.0638827	0.202345
>Proteimics identification	283	P07288	P07288	KLK3	Prostate-specific antigen	139;601;841;842;951;980;1147;1171;1557;1558;1796	1654;1655;1656;1657;1658;1659;1660;1661;1662;2311;2312;2313;2314;2315;2316;2317;2318;2319;2320;2321;2322;2323;2324;2325;2593;2594;2595;2596;2597;2598;2656;2657;2658;3048;3049;3050;3175;3176;3177;3178;3179;3180;3181;3182;3183;3184;3185;3186;3187;3188;3189;337;338;339;340;341;342;4233;4234;4235;4236;4237;4238;4239;4240;4808;4809;4810;4811;4812;4813;4814;4815;4816;4817;4818;4819;4820;4821;4822;4823;…	P07288	11	10	NO	73.9	70.5	28.741	261	211.55	0	10	8	>Quantification	P07288	P07288			133670000	68591000	65083000	8.12603	7.83627	7.81347	59	56	30	23	53	50	23	18	P07288	0.123065	0.0454188	0.142518	0.0413736	0.254309	0.386873	0.128872	0.051931	0.126248	0.159646
>Proteimics identification	439	Q00796	Q00796	SORD	Sorbitol dehydrogenase	0;63;74;100;438;832;1044;1134;1898;1941	0;1200;1201;1202;1203;164;165;188;2271;2272;250;251;2822;2823;2824;3008;3009;5087;5181;5182;5183;5184	Q00796	10	10	NO	40.3	40.3	38.324	357	113.74	0	8	9	>Quantification	Q00796	Q00796			859810	520090	339710	5.9344	5.71608	5.53111	11	11	11	9	11	11	11	8	Q00796	0.149892	0.0815351	0.150283	0.0934204	0.293966	0.230904	0.132691	0.0720134	0.170963	0.0930129
>Proteimics identification	297	P08473	P08473	MME	Neprilysin	168;259;365;382;400;451;515;846;879;884;1082;1113;1115;1130;1227;1267;1385;1475;1614;1740;1782;1909	1014;1015;1083;1084;1116;1238;1452;1453;2341;2342;2419;2433;2908;2965;2966;2967;2968;2970;2971;2972;3000;3331;3332;3333;3460;3761;4004;4360;4361;4661;4662;4749;4750;5107;5108;511;715;716	P08473	22	22	NO	38.3	38.3	85.513	750	226.86	0	18	14	>Quantification	P08473	P08473			1745800	975010	770760	6.24199	5.98901	5.88692	22	22	22	17	16	16	16	12	P08473	0.227792	0.0178582	0.0915942	0.0382348	0.12108	0.503441	0.235689	0.0191363	0.0855942	0.0536996
>Proteimics identification	525	Q9UHI8	Q9UHI8	ADAMTS1	A disintegrin and metalloproteinase with thrombospondin motifs 1	703;1346	1940;1941;3630;3631	Q9UHI8	2	2	NO	2.3	2.3	105.36	967	13.957	0	2	2	>Quantification	Q9UHI8	Q9UHI8			78556	41999	36557	4.89518	4.62324	4.56297	2	2	2	2	2	2	2	2	Q9UHI8	0.105507	0.091979	0.0528553	0.149398	0.286644	0.313615	0.0950515	0.0841835	0.0485559	0.170953
>Proteimics identification	348	P20151-2	P20151	KLK2	Isoform 2 of Kallikrein-2	833;951;1780	2273;2274;2593;2594;2595;2596;2597;2598;4742;4743;4744;4745;4746	P20151-2;P20151	3	2	NO	23.8	19.7	24.674	223	19.578	0	2	2	>Quantification	P20151-2	P20151-2			1854400	970010	884430	6.2682	5.98678	5.94666	6	3	2	2	7	4	2	2	P20151-2	0.0673381	0.0856187	0.0833607	0.130208	0.339395	0.294079	0.0649487	0.091679	0.0843056	0.12683
>Proteimics identification	329	P14625	P14625	HSP90B1	Endoplasmin	394;407;462;719;1079;1952	1108;1133;1269;1270;1271;1975;1976;2904;2905;5216;5217	P14625	6	5	NO	9	7.5	92.468	803	49.044	0	4	4	>Quantification	P14625	P14625			78790	43727	35063	4.89647	4.64075	4.54485	6	4	4	4	5	4	4	4	P14625	0.187715	0.109209	0.36991	0.0708628	0.11066	0.151642	0.208136	0.129919	0.335411	0.0830509
>Proteimics identification	474	Q6YHK3-4	Q6YHK3	CD109	Isoform 4 of CD109 antigen	18;191;670;1532;1666	1815;1816;4161;4162;44;4459;4460;4461;4462;569;570	Q6YHK3-4;Q6YHK3	5	5	NO	6.4	6.4	159.69	1428	68.548	0	4	5	>Quantification	Q6YHK3-4	Q6YHK3-4			58031	25279	32752	4.76366	4.40276	4.51524	5	5	5	5	6	6	5	5	Q6YHK3-4	0.165478	0.0540274	0.0861627	0.0691893	0.310859	0.314284	0.175227	0.0491779	0.136009	0.0463506
>Proteimics identification	402	P49221	P49221	TGM4	Protein-glutamine gamma-glutamyltransferase 4	524;681;843;878;1289;1314;1324;1472;1879	1474;1475;1876;1877;2326;2417;2418;3504;3557;3558;3559;3560;3588;3589;3996;5047;5048	P49221	9	9	NO	18	18	77.144	684	86.387	0	7	7	>Quantification	P49221	P49221			275660	128280	147380	5.44037	5.10816	5.16844	9	9	9	7	8	8	8	7	P49221	0.20992	0.0262344	0.0489233	0.148963	0.498397	0.0675623	0.201372	0.0221162	0.0649119	0.137574
>Proteimics identification	243	P00558-2	P00558	PGK1	Isoform 2 of Phosphoglycerate kinase 1	578;662;939;1376;1786;1949	1607;1801;1802;2570;2571;3742;4756;4757;5205;5206;5207;5208	P00558-2;P00558	6	5	NO	21.3	19.3	41.428	389	43.781	0	5	4	>Quantification	P00558-2	P00558-2			386650	200910	185730	5.58732	5.303	5.26888	6	6	5	4	6	6	6	5	P00558-2	0.122821	0.0623881	0.121419	0.120022	0.258294	0.315056	0.13462	0.114445	0.119346	0.0777975
>Proteimics identification	268	P04083	P04083	ANXA1	Annexin A1	723;777;792;907	1986;1987;1988;1989;2143;2144;2180;2181;2182;2183;2488;2489	P04083	4	4	NO	15	15	38.714	346	68.73	0	4	4	>Quantification	P04083	P04083			760810	397600	363210	5.88128	5.59945	5.56016	6	6	6	5	6	6	6	5	P04083	0.168311	0.0681593	0.0930557	0.0680159	0.313861	0.288597	0.166933	0.0471926	0.0804519	0.0768824
>Proteimics identification	452	Q12841	Q12841	FSTL1	Follistatin-related protein 1	176;205;225;397;674;714;855;928	1111;1112;1855;1856;1965;1966;2363;2533;534;535;606;607;651;652	Q12841	8	8	NO	32.5	32.5	34.985	308	98.738	0	7	7	>Quantification	Q12841	Q12841			2023000	1085100	937890	6.306	6.03547	5.97215	7	7	7	4	7	7	7	6	Q12841	0.105417	0.101181	0.180314	0.0930517	0.298219	0.221816	0.136788	0.099975	0.162559	0.105213
>Proteimics identification	25	G8JL96	G8JL96	PTPRS	Receptor-type tyrosine-protein phosphatase S	247;331;405;556;1772	1129;1555;1556;4730;690;932;933;934	G8JL96;A0A0A0MR60;Q13332-7;Q13332-5;Q13332-6;Q13332-3;Q13332-4;Q13332-2;Q13332	5	5	NO	6.4	6.4	168.43	1501	72.466	0	4	3	>Quantification	G8JL96	G8JL96			64132	39163	24969	4.80707	4.59288	4.3974	5	5	5	5	3	3	3	3	G8JL96	0.151409	0.0507787	0.124589	0.0680404	0.252861	0.352322	0.130745	0.0942116	0.0816306	0.0417513
>Proteimics identification	305	P10323	P10323	ACR	Acrosin	581;775;1158	1612;1613;2141;3151;3152	P10323	3	3	NO	8.6	8.6	45.846	421	19.013	0	3	2	>Quantification	P10323	P10323			88270	51165	37105	4.94581	4.70897	4.56943	3	3	3	3	2	2	2	2	P10323	0.244483	0.127024	0.268669	0.0593229	0.104422	0.196078	0.254883	0.116816	0.303289	0.0521089
>Proteimics identification	9	A0A087WVM2	A0A087WVM2	CD177	CD177 antigen	217;656;690;786;1230;1345;1354;1371	1792;1897;1898;2170;2171;3338;3339;3340;3341;3342;3626;3627;3628;3629;3656;3657;3658;3729;632;633	A0A087WVM2;Q8N6Q3	8	8	NO	29.5	29.5	46.381	437	80.272	0	6	8	>Quantification	A0A087WVM2	A0A087WVM2			3987000	1795500	2191500	6.60065	6.25419	6.34074	10	10	8	4	10	10	9	8	A0A087WVM2	0.08967	0.0721696	0.0472141	0.0449782	0.428346	0.263851	0.146619	0.0600249	0.124235	0.0726578
>Proteimics identification	186	H3BTQ8	H3BTQ8	SPINT1	Kunitz-type protease inhibitor 1 (Fragment)	160;972;1482;1812;1889	2642;2643;4016;4017;4018;4883;4884;4885;495;496;5067;5068;5069	H3BTQ8;H3BVD9;O43278-2;O43278	5	5	NO	17.3	17.3	33.173	301	35.688	0	5	5	>Quantification	H3BTQ8	H3BTQ8			989380	477910	511460	5.99536	5.67935	5.70881	6	6	6	6	7	7	7	6	H3BTQ8	0.169777	0.0697161	0.138563	0.056815	0.255201	0.309928	0.184627	0.0747149	0.129019	0.0619714
>Proteimics identification	27	A0A0A0MS08	A0A0A0MS08	IGHG1	Immunoglobulin heavy constant gamma 1 (Fragment)	486;606;689;748;1304;1565;1675;1695	1330;1674;1675;1676;1677;1894;1895;1896;2043;2044;3532;3533;3534;3535;4251;4252;4253;4480;4481;4535;4536;4537	A0A0A0MS08;P01857	8	5	NO	29.8	19	43.911	399	104.39	0	5	5	>Quantification	A0A0A0MS08	A0A0A0MS08			2688500	1029800	1658700	6.42951	6.01275	6.21977	10	6	6	5	12	8	8	7	A0A0A0MS08	0.170225	0.0858815	0.0981516	0.207955	0.260321	0.177466	0.168339	0.0822201	0.110073	0.22254
>Proteimics identification	105	Q5JR07	Q5JR07	RHOC	Rho-related GTP-binding protein RhoC (Fragment)	816;1198;1408;1603	2228;2229;3252;3253;3254;3255;3814;3815;4339;4340	Q5JR07;C9JNR4;E9PQH6;C9JX21;Q5JR08;Q5JR05;P61586;P08134	4	4	NO	40.2	40.2	14.384	127	34.211	0	4	4	>Quantification	Q5JR07	Q5JR07			1189300	577000	612340	6.07529	5.76118	5.78699	5	5	5	5	5	5	5	5	Q5JR07	0.160412	0.0631793	0.155626	0.0658305	0.278598	0.276354	0.160501	0.0721709	0.142118	0.0736551
>Proteimics identification	200	J3KNB4	J3KNB4	CAMP	Cathelicidin antimicrobial peptide	536;767;1426;1698;1699	1512;1513;2093;3868;3869;4542;4543;4544;4545;4546	J3KNB4;P49913	5	5	NO	20.2	20.2	19.591	173	32.39	0	4	5	>Quantification	J3KNB4	J3KNB4			6109500	2657600	3451900	6.78601	6.42449	6.53806	4	4	4	4	6	6	6	5	J3KNB4	0.235985	0.0840947	0.318544	0.102247	0.137053	0.122076	0.222632	0.0927282	0.290004	0.0973028
>Proteimics identification	249	Q5H9A7	Q5H9A7	TIMP1	Metalloproteinase inhibitor 1	484;639;686;1149;1159;1471;1720	1326;1758;1759;1885;1886;1887;3054;3055;3153;3154;3155;3995;4614;4615;4616;4617;4618	Q5H9A7;P01033	7	7	NO	78.3	78.3	16.057	143	90.468	0	6	6	>Quantification	Q5H9A7	Q5H9A7			12400000	3541700	8858100	7.09342	6.54921	6.94734	8	8	8	6	9	9	9	8	Q5H9A7	0.121141	0.108629	0.14086	0.126243	0.259191	0.2213	0.0870327	0.085374	0.126315	0.0585794
>Proteimics identification	540	Q9Y6R7	Q9Y6R7	FCGBP	IgGFc-binding protein	69;106;410;1166;1262;1804;1827;1975	1137;1138;175;176;177;262;3163;3452;3453;4869;4935;4936;5273	Q9Y6R7	8	8	NO	4.7	4.7	572.01	5405	87.527	0	5	7	>Quantification	Q9Y6R7	Q9Y6R7			27773	12413	15360	4.44362	4.09388	4.18639	6	6	5	4	7	7	7	4	Q9Y6R7	0.172744	0.0285159	0.0743566	0.104209	0.512386	0.107788	0.102252	0.108457	0.0126152	0.231182
>Proteimics identification	126	E7EQB2	E7EQB2	LTF	Lactotransferrin (Fragment)	19;175;192;200;211;219;249;257;340;372;399;503;504;541;547;568;569;616;671;695;746;751;858;969;970;1007;1024;1165;1282;1414;1443;1444;1455;1465;1530;1549;1576;1579;1597;1640;1852;1853;1929;1973	1051;1052;1053;1054;1055;1056;1114;1115;1407;1408;1409;1410;1411;1412;1413;1522;1523;1524;1536;1537;1538;1539;1586;1587;1588;1589;1706;1707;1817;1818;1819;1820;1821;1822;1823;1824;1825;1826;1827;1828;1829;1830;1831;1832;1833;1834;1835;1836;1837;1838;1839;1840;1841;1842;1843;1844;1845;1905;1906;1907;2038;2039;2040;2050;2372;2373;2374;2375;2376;2377;2378;2379;2380;2381;2382;2637;2638;2639;2640;2734…	E7EQB2;P02788	44	44	NO	74.4	74.4	76.625	696	323.31	0	40	42	>Quantification	E7EQB2	E7EQB2			86704000	44150000	42554000	7.93804	7.64493	7.62894	102	102	95	78	100	100	95	77	E7EQB2	0.158707	0.147925	0.291431	0.104382	0.195216	0.0957288	0.158523	0.151293	0.264623	0.144692
>Proteimics identification	330	P15144	P15144	ANPEP	Aminopeptidase N	77;117;261;301;304;393;479;525;626;627;990;1058;1234;1339;1397;1416;1417;1418;1429;1430;1463;1479;1503;1567;1803;1828;1836;1935	1104;1105;1106;1107;1313;1314;1315;1476;1477;1478;1479;1480;1726;1727;1728;1729;1730;1731;1732;1733;193;194;2687;2688;2689;2690;283;284;285;2857;2858;2859;3349;3350;3351;3352;3353;3354;3355;3356;3357;3614;3615;3616;3784;3785;3832;3833;3834;3835;3836;3837;3838;3839;3840;3841;3842;3843;3844;3845;3846;3847;3848;3849;3850;3851;3852;3874;3875;3876;3877;3878;3974;3975;3976;4009;4010;4011;4012;4098;4099…	P15144	28	28	NO	33.6	33.6	109.54	967	323.31	0	27	26	>Quantification	P15144	P15144			5823500	3292100	2531400	6.76518	6.51747	6.40336	52	52	50	37	46	46	46	36	P15144	0.155852	0.0351358	0.167358	0.033493	0.194431	0.408217	0.181382	0.0314058	0.190901	0.0286167
>Proteimics identification	279	P06733	P06733	ENO1	Alpha-enolase	15;232;379;572;742;876;1457;1484;1802;1841;1917	1075;1076;1077;1078;1079;1596;1597;2029;2030;2031;2032;2414;37;38;39;3964;3965;4020;4021;4865;4866;4968;4969;5125;5126;5127;5128;664	P06733	11	11	NO	38.5	38.5	47.168	434	145.67	0	11	8	>Quantification	P06733	P06733			924450	508130	416320	5.96588	5.70597	5.61943	16	16	14	12	12	12	12	10	P06733	0.125672	0.060972	0.159748	0.0606152	0.331426	0.261567	0.125405	0.108021	0.17771	0.0667713
>Proteimics identification	261	P02768	P02768	ALB	Serum albumin	5;21;22;31;99;149;177;183;292;361;398;419;420;513;589;834;836;989;1027;1032;1189;1200;1205;1206;1237;1258;1259;1358;1392;1403;1431;1432;1438;1439;1488;1514;1606;1711;1766;1767;1808;1913	1000;1001;1002;1003;1004;1005;1006;1007;1008;1113;1157;1158;1159;1160;1161;1162;1431;1432;1433;1434;1435;1436;1437;1438;1439;1440;1441;1442;1443;1444;1445;1446;1447;1448;1449;1629;1630;17;18;2275;2276;2279;2280;2281;2282;2283;2284;2285;2286;2287;240;241;242;243;244;245;246;247;248;249;2686;2785;2786;2798;2799;3228;3229;3257;3258;3268;3269;3270;3271;3272;3273;3274;3361;3362;3363;3364;3365;3366;336…	P02768	42	42	NO	70.6	70.6	69.366	609	323.31	0	38	39	>Quantification	P02768	P02768			54173000	30930000	23243000	7.73378	7.49038	7.36629	137	137	112	97	131	131	108	92	P02768	0.181153	0.100517	0.164511	0.107887	0.224088	0.216502	0.195866	0.105156	0.153153	0.113964
>Proteimics identification	246	P01019	P01019	AGT	Angiotensinogen	92;327;1144;1511;1790	226;227;3043;3044;4119;4120;4121;4765;4766;911;912;913	P01019	5	5	NO	13.2	13.2	53.154	485	37.235	0	5	4	>Quantification	P01019	P01019			241760	139940	101820	5.38338	5.14594	5.00783	8	8	7	6	4	4	4	4	P01019	0.215991	0.157491	0.265611	0.0657235	0.158142	0.137041	0.134875	0.138644	0.192534	0.0521662
>Proteimics identification	332	P15309	P15309	ACPP	Prostatic acid phosphatase	136;137;250;472;502;534;599;613;614;638;677;1152;1172;1422;1535	1295;1296;1297;1298;1299;1300;1301;1302;1383;1384;1385;1386;1387;1388;1389;1390;1391;1392;1393;1394;1395;1396;1397;1398;1399;1400;1401;1402;1403;1404;1405;1406;1496;1497;1498;1499;1500;1501;1502;1503;1504;1505;1506;1507;1508;1509;1651;1692;1693;1694;1695;1696;1697;1698;1699;1700;1701;1702;1703;1704;1757;1864;1865;1866;1867;1868;1869;1870;3059;3060;3061;3062;3063;3064;3065;3066;3067;3068;3069;3070…	P15309	15	15	NO	44.8	44.8	44.566	386	249.17	0	12	14	>Quantification	P15309	P15309			163970000	85264000	78706000	8.21476	7.93077	7.89601	81	81	70	56	90	90	75	60	P15309	0.154538	0.070695	0.154202	0.070766	0.259907	0.286212	0.15404	0.138139	0.146071	0.0629644
>Proteimics identification	217	O00468-6	O00468	AGRN	Isoform 6 of Agrin	251;710;869;1448;1478;1493;1612;1629	1954;1955;2401;3935;3936;4008;4071;4072;4356;4357;4389;700;701	O00468-6;O00468-3	8	8	NO	4.4	4.4	214.84	2045	48.75	0	8	5	>Quantification	O00468-6	O00468-6			48586	28921	19665	4.68651	4.46121	4.29369	8	8	7	6	5	5	5	5	O00468-6	0.14817	0.0692669	0.164156	0.0804233	0.24241	0.295574	0.17937	0.0745357	0.159592	0.0820299
>Proteimics identification	447	Q04760-2	Q04760	GLO1	Isoform 2 of Lactoylglutathione lyase	623;624;678;1781	1720;1721;1722;1871;1872;4747;4748	Q04760-2;Q04760	4	4	NO	24.9	24.9	19.043	169	30.479	0	3	3	>Quantification	Q04760-2	Q04760-2			514860	305280	209570	5.71169	5.4847	5.32133	4	4	3	3	3	3	3	3	Q04760-2	0.119758	0.0818277	0.129557	0.108757	0.31398	0.246121	0.0814677	0.0561642	0.0824441	0.0849172
>Proteimics identification	437	P80723	P80723	BASP1	Brain acid soluble protein 1	33;36;116;496;809	1368;1369;1370;1371;2212;2213;282;74;75;78;79	P80723	5	5	NO	33.9	33.9	22.693	227	38.157	0	5	3	>Quantification	P80723	P80723			1409200	817850	591370	6.14897	5.91267	5.77186	7	7	7	6	4	4	4	4	P80723	0.147741	0.0750329	0.150739	0.0911027	0.307639	0.227746	0.196122	0.0981747	0.16277	0.0962988
>Proteimics identification	372	P30046	P30046	DDT	D-dopachrome decarboxylase	567;1022;1023;1330	1584;1585;2777;2778;3597	P30046	4	4	NO	33.1	33.1	12.712	118	40.623	0	3	2	>Quantification	P30046	P30046			427290	224890	202410	5.63072	5.35197	5.30623	3	3	3	3	2	2	2	2	P30046	0.176287	0.12011	0.0600981	0.150905	0.275456	0.217143	0.198661	0.115236	0.122011	0.127372
>Proteimics identification	433	P63104	P63104	YWHAZ	14-3-3 protein zeta/delta	263;597;708;1283;1581;1924	1648;1649;1951;1952;3492;3493;4291;5139;722;723;724;725	P63104	6	5	NO	31	27.8	27.745	245	57.051	0	5	3	>Quantification	P63104	P63104			620080	352370	267700	5.79245	5.547	5.42765	7	6	6	6	5	4	4	4	P63104	0.160402	0.0802687	0.154839	0.087562	0.262575	0.254354	0.159423	0.100031	0.15048	0.0737391
>Proteimics identification	391	P40925	P40925	MDH1	Malate dehydrogenase, cytoplasmic	363;473;494;518;632	1010;1011;1303;1365;1460;1461;1744;1745;1746	P40925;P40925-3	5	5	NO	16.8	16.8	36.426	334	44.571	0	5	3	>Quantification	P40925	P40925			457980	270360	187620	5.66085	5.43194	5.27328	6	6	6	3	3	3	3	3	P40925	0.180418	0.0617051	0.129504	0.0856536	0.255611	0.287109	0.200206	0.0537591	0.13974	0.0739096
>Proteimics identification	317	P12277	P12277	CKB	Creatine kinase B-type	289;544;709;780;1019;1062;1526;1609;1625;1792	1527;1528;1529;1530;1953;2152;2153;2766;2767;2768;2865;2866;4146;4147;4351;4382;4383;4769;4770;838	P12277	10	10	NO	43	43	42.644	381	133.12	0	8	9	>Quantification	P12277	P12277			1549400	709330	840110	6.19016	5.85085	5.92434	9	9	9	7	11	11	11	9	P12277	0.163691	0.0862837	0.151653	0.078827	0.286212	0.233333	0.147001	0.091716	0.136153	0.0547421
>Proteimics identification	482	Q8WVQ1-3	Q8WVQ1	CANT1	Isoform 3 of Soluble calcium-activated nucleotidase 1	113;150;585;737;808	1619;1620;2019;2211;276;277;424;425	Q8WVQ1-3;Q8WVQ1	5	5	NO	18.9	18.9	38.945	350	60.478	0	4	4	>Quantification	Q8WVQ1-3	Q8WVQ1-3			152160	79163	72998	5.1823	4.89852	4.86331	4	4	4	4	4	4	4	4	Q8WVQ1-3	0.136505	0.119175	0.153565	0.124398	0.264146	0.202211	0.158941	0.0967634	0.161512	0.129407
>Proteimics identification	422	P60174-1	P60174	TPI1	Isoform 2 of Triosephosphate isomerase	237;570;853;892;1401;1533;1602;1723;1806;1843	1590;1591;2360;2454;2455;3791;3792;3793;4163;4338;4624;4625;4626;4872;4873;4971;4972;4973;4974;671	P60174-1;P60174	10	10	NO	55	55	26.669	249	87.646	0	7	9	>Quantification	P60174-1	P60174-1			1694100	870960	823140	6.22894	5.94	5.91547	8	8	8	5	12	12	12	9	P60174-1	0.180781	0.0742456	0.160384	0.113352	0.274917	0.19632	0.182587	0.0736833	0.194502	0.0947047
>Proteimics identification	271	P04406-2	P04406	GAPDH	Isoform 2 of Glyceraldehyde-3-phosphate dehydrogenase	655;891;1084;1197;1771;1810;1869	1788;1789;1790;1791;2452;2453;2910;2911;2912;2913;3248;3249;3250;3251;4729;4880;4881;5031	P04406-2;P04406	7	7	NO	35.2	35.2	31.548	293	67.31	0	6	6	>Quantification	P04406-2	P04406-2			952770	465880	486890	5.97899	5.66827	5.68743	9	9	9	6	9	9	9	7	P04406-2	0.158258	0.0815836	0.148406	0.104314	0.27846	0.228979	0.161457	0.10538	0.144282	0.104862
>Proteimics identification	406	P50395	P50395	GDI2	Rab GDP dissociation inhibitor beta	293;550;636;763;975;1809	1544;1753;1754;2079;2080;2649;4878;4879;844	P50395	6	6	NO	16.4	16.4	50.663	445	70.684	0	6	3	>Quantification	P50395	P50395			132130	84299	47829	5.121	4.92582	4.67969	6	6	5	5	3	3	3	3	P50395	0.161506	0.0654447	0.15346	0.0767645	0.260113	0.282712	0.251268	0.1045	0.17684	0.121657
>Proteimics identification	295	P08253	P08253	MMP2	72 kDa type IV collagenase	42;495;561;615;885;1349;1460;1608;1713	111;112;113;1366;1367;1568;1569;1705;2434;2435;2436;3634;3969;3970;4349;4350;4586;4587	P08253	9	9	NO	19.1	19.1	73.881	660	90.657	0	8	8	>Quantification	P08253	P08253			376410	196690	179720	5.57566	5.29378	5.2546	8	8	8	6	10	10	9	8	P08253	0.157467	0.21878	0.188314	0.197223	0.0986775	0.13954	0.156771	0.220593	0.18086	0.182326
>Proteimics identification	328	P14618	P14618	PKM	Pyruvate kinase PKM	34;185;384;650;701;800;966;1013;1313;1427;1601	1087;1088;1779;1937;1938;2199;2200;2629;2630;2631;2632;2753;2754;2755;3555;3556;3870;3871;4336;4337;558;559;560;76	P14618	11	11	NO	36.9	36.9	57.936	531	121.46	0	10	10	>Quantification	P14618	P14618			308140	177670	130470	5.48875	5.24961	5.11551	13	13	13	12	11	11	11	9	P14618	0.154397	0.0885719	0.16097	0.0731019	0.305445	0.217515	0.151817	0.0678406	0.222215	0.0703537
>Proteimics identification	263	P02790	P02790	HPX	Hemopexin	517;696;1117;1216;1268;1437;1483;1970	1458;1459;1908;2975;3308;3309;3461;3893;4019;5262;5263	P02790	8	8	NO	22.1	22.1	51.676	462	69.583	0	4	7	>Quantification	P02790	P02790			346700	156620	190070	5.53995	5.19485	5.27891	4	4	3	3	7	7	6	6	P02790	0.182464	0.0467256	0.0659669	0.0898035	0.345454	0.269585	0.19831	0.0949523	0.140392	0.0825513
>Proteimics identification	469	Q66K79-2	Q66K79	CPZ	Isoform 2 of Carboxypeptidase Z	500;1099;1738	1378;2941;4657;4658	Q66K79-2;Q66K79	3	3	NO	5.5	5.5	72.533	641	22.551	0	2	2	>Quantification	Q66K79-2	Q66K79-2			27964	17828	10136	4.4466	4.2511	4.00587	2	2	2	2	2	2	2	2	Q66K79-2	0.205591	0.228813	0.242698	0.192447	0.0546219	0.0758292	0.0734147	0.167647	0.340594	0.232617
>Proteimics identification	274	P05154	P05154	SERPINA5	Plasma serine protease inhibitor	154;406;621;687;783;1238;1384;1669	1130;1131;1132;1715;1716;1717;1718;1888;1889;1890;1891;2157;2158;2159;2160;3400;3401;3402;3403;3404;3405;3406;3407;3759;3760;431;432;4466;4467;4468;4469	P05154	8	8	NO	23.4	23.4	45.674	406	99.722	0	8	8	>Quantification	P05154	P05154			2150700	1079100	1071600	6.33258	6.03306	6.03003	15	15	15	12	16	16	16	15	P05154	0.117611	0.182611	0.29112	0.195759	0.105175	0.107362	0.0889426	0.197207	0.302673	0.202818
>Proteimics identification	310	P11047	P11047	LAMC1	Laminin subunit gamma-1	352;1167;1338;1539;1663	3164;3165;3612;3613;4179;4452;980	P11047	5	5	NO	4.8	4.8	177.6	1609	39.892	0	3	4	>Quantification	P11047	P11047			29310	13797	15514	4.46702	4.13978	4.19072	3	3	3	3	4	4	4	4	P11047	0.101485	0.122947	0.110998	0.0948555	0.306054	0.26366	0.217237	0.155297	0.144611	0.111645
>Proteimics identification	64	A0A286YEY4	A0A286YEY4	IGHG2	Immunoglobulin heavy constant gamma 2 (Fragment)	486;1304;1564;1693;1849	1330;3532;3533;3534;3535;4247;4248;4249;4250;4531;4532;4533;4985;4986	A0A286YEY4;P01859	5	2	NO	17.2	8.4	43.805	395	14.961	0	2	2	>Quantification	A0A286YEY4	A0A286YEY4			285210	112940	172280	5.45516	5.05285	5.23623	7	2	2	2	7	3	3	3	A0A286YEY4	0.125347	0.052535	0.134672	0.105211	0.320531	0.261704	0.14213	0.0717431	0.148695	0.0952418
>Proteimics identification	82	B4DYP1	B4DYP1	DDAH1	N(G),N(G)-dimethylarginine dimethylaminohydrolase 1	418;651;1186;1674;1739	1155;1156;1780;3221;4479;4659;4660	B4DYP1;O94760-2;O94760	5	5	NO	33	33	20.535	185	31.934	0	3	4	>Quantification	B4DYP1	B4DYP1			350450	168810	181650	5.54463	5.2274	5.25924	3	3	3	3	4	4	4	4	B4DYP1	0.16373	0.0656432	0.132364	0.0900156	0.238815	0.309432	0.212867	0.0828177	0.149627	0.110671
>Proteimics identification	414	P54289-5	P54289	CACNA2D1	Isoform 5 of Voltage-dependent calcium channel subunit alpha-2/delta-1	1104;1540;1783	2948;4180;4751;4752	P54289-5;P54289-2;P54289	3	3	NO	4.3	4.3	122.44	1084	23.074	0	3	1	>Quantification	P54289-5	P54289-5			12955	7188.8	5766.5	4.11244	3.85666	3.76091	3	3	3	3	1	1	1	1	P54289-5	0.104215	0.123745	0.0764583	0.0515829	0.287302	0.356697	0.161345	0.0711597	0.140183	0.107454
>Proteimics identification	24	A0A0A0MQX7	A0A0A0MQX7	SPOCK1	Testican-1	551;1042;1089;1510;1517;1736	1545;1546;2820;2920;4115;4116;4117;4118;4130;4131;4652;4653;4654;4655	A0A0A0MQX7;Q08629	6	5	NO	20.7	18	42.219	377	48.331	0	4	4	>Quantification	A0A0A0MQX7	A0A0A0MQX7			692880	374890	317990	5.84066	5.5739	5.50241	7	6	5	5	7	6	5	4	A0A0A0MQX7	0.15804	0.0598205	0.163145	0.0759289	0.261013	0.282052	0.106174	0.298161	0.0963266	0.0814361
>Proteimics identification	343	P19440	P19440	GGT1	Glutathione hydrolase 1 proenzyme	276;693;711;1059;1270;1706	1902;1956;1957;1958;2860;2861;3463;3464;4564;4565;4566;4567;810;811	P19440	6	6	NO	13.5	13.5	61.409	569	49.445	0	5	5	>Quantification	P19440	P19440			448370	235860	212520	5.65164	5.37265	5.3274	7	7	7	6	7	7	7	5	P19440	0.155643	0.0866957	0.166356	0.0724098	0.219865	0.299031	0.150398	0.0888101	0.189507	0.0726429
>Proteimics identification	7	H3BNC6	H3BNC6	CDH1	Cadherin-1	590;760;1761	1631;2072;4705	H3BNC6;A0A087WX17;A0A087WU43;A0A087WXI5;P12830	3	3	NO	9.3	9.3	59.399	537	25.449	0	2	1	>Quantification	H3BNC6		H3BNC6	H3BNC6	54377	49905	4472.5	4.73542	4.69814	3.65055	2	2	2	2	1	1	1	1	H3BNC6	0.123835	0.0970243	0.126388	0.106467	0.221411	0.324874	0	2.12e-07	0	0
>Proteimics identification	475	Q8IZP9-10	Q8IZP9	ADGRG2	Isoform 10 of Adhesion G-protein coupled receptor G2	95;920	230;231;2511;2512	Q8IZP9-10;Q8IZP9-9;Q8IZP9-8;Q8IZP9-7;Q8IZP9-5;Q8IZP9-6;Q8IZP9-3;Q8IZP9-4;Q8IZP9-2;Q8IZP9	2	2	NO	3.7	3.7	98.719	898	21.746	0	2	2	>Quantification	Q8IZP9-10	Q8IZP9-10			28081	15484	12596	4.44841	4.18988	4.10023	2	2	2	2	2	2	2	2	Q8IZP9-10	0.608135	0.178167	0.115871	0.0348077	0.0407907	0.0222295	0.40333	0.0873137	0.218211	0.0726483
>Proteimics identification	337	P16930-2	P16930	FAH	Isoform 2 of Fumarylacetoacetase	1863	5021;5022	P16930-2;P16930	1	1	YES	3.4	3.4	38.614	349	6.7858	0	1	1	>Quantification	P16930-2		P16930-2	P16930-2	8274.9	4478.2	3796.7	3.91776	3.6511	3.57941	1	1	1	1	1	1	1	1	P16930-2	0	7.15e-06	0	0.16367	0.532894	0.303429	0.285402	0	0.00158766	0
>Proteimics identification	87	B7Z8V9	B7Z8V9	CRISPLD1	Cysteine-rich secretory protein LCCL domain-containing 1	158;744	2035;491;492;493	B7Z8V9;Q9H336	2	2	NO	6.7	6.7	35.055	312	12.558	0	2	1	>Quantification	B7Z8V9	B7Z8V9			128990	90566	38427	5.11056	4.95697	4.58464	2	2	2	2	2	2	2	2	B7Z8V9	0.140986	0.0986732	0.0900902	0.0972707	0.286408	0.286572	0.154198	0.0983168	0.100185	0.0895891
>Proteimics identification	442	Q02383	Q02383	SEMG2	Semenogelin-2	268;368;370;694;697;698;730;752;755;769;771;772;801;828;921;936;993;1131;1215;1350;1370;1436;1486;1507;1544;1546;1547;1550;1682	1020;1023;1024;1025;1026;1027;1028;1029;1030;1031;1032;1033;1034;1035;1036;1037;1038;1039;1040;1041;1042;1043;1903;1904;1909;1910;1911;1912;1913;1914;1915;1916;1917;1918;1919;1920;1921;1922;1923;1924;1925;1926;1927;1928;1929;1930;2004;2005;2006;2007;2008;2051;2052;2060;2061;2062;2063;2064;2065;2096;2097;2098;2099;2100;2101;2102;2103;2104;2113;2114;2115;2116;2117;2118;2119;2120;2121;2122;2123;2124…	Q02383	29	25	NO	56.4	50.5	65.444	582	323.31	0	24	21	>Quantification	Q02383	Q02383			272730000	144970000	127760000	8.43573	8.16128	8.10639	107	89	88	70	106	84	83	67	Q02383	0.123467	0.273249	0.155597	0.191517	0.119275	0.115932	0.13066	0.244354	0.176628	0.215185
>Proteimics identification	180	H3BMA1	H3BMA1	MSLN	Mesothelin (Fragment)	82;435;927;1101;1607;1797	1195;203;2531;2532;2944;4347;4348;4855	H3BMA1;H3BUX1;Q13421-4;Q13421-3;Q13421;Q13421-2	6	6	NO	21	21	37.561	334	38.032	0	4	4	>Quantification	H3BMA1	H3BMA1			320050	166130	153920	5.50522	5.22045	5.1873	4	4	4	4	4	4	4	4	H3BMA1	0.0800711	0.051326	0.628817	0.0891965	0.0418808	0.108709	0.0688119	0.0494041	0.619867	0.0971809
>Proteimics identification	288	P07737	P07737	PFN1	Profilin-1	342;1560	4242;4243;956;957	P07737	2	2	NO	18.6	18.6	15.054	140	24.411	0	2	2	>Quantification	P07737	P07737			281160	160140	121020	5.44895	5.2045	5.08286	2	2	2	2	2	2	2	2	P07737	0.158031	0.0851193	0.0692027	0.0850621	0.315954	0.286631	0.146202	0.0770195	0.157441	0.0608179
>Proteimics identification	478	Q8NCW5-2	Q8NCW5	NAXE	Isoform 2 of NAD(P)H-hydrate epimerase	733;1056	2013;2853;2854	Q8NCW5-2;Q8NCW5	2	2	NO	16.8	16.8	20.43	185	14.459	0	2	1	>Quantification	Q8NCW5-2	Q8NCW5-2			107920	77132	30786	5.0331	4.88723	4.48835	2	2	2	2	1	1	1	1	Q8NCW5-2	0.173365	0.0734671	0.0867875	0.122774	0.283676	0.259929	0.126144	0.105279	0.142861	0.0883171
>Proteimics identification	427	P61916	P61916	NPC2	NPC intracellular cholesterol transporter 2	155;238;280;520;1213;1302;1485;1718	1464;1465;1466;1467;3294;3295;3296;3297;3530;4022;4023;4024;433;434;435;436;437;438;439;440;441;442;443;444;445;446;447;448;449;450;451;452;453;454;455;456;457;458;459;460;461;4611;4612;462;463;464;465;466;467;468;469;470;471;472;473;474;475;476;477;478;479;480;481;482;483;484;672;673;674;675;676;817	P61916	8	8	NO	62.9	62.9	16.57	151	161.08	0	6	7	>Quantification	P61916	P61916			53912000	29140000	24772000	7.73169	7.46449	7.39396	38	38	20	18	34	34	18	14	P61916	0.210108	0.0733659	0.295421	0.0695391	0.144209	0.199123	0.221445	0.068876	0.272826	0.0739145
>Proteimics identification	354	Q32Q12	Q32Q12	NME1-NME2	Nucleoside diphosphate kinase	336;448;734;1622	1233;2014;2015;4377;940	Q32Q12;P22392;P22392-2	4	4	NO	22.3	22.3	32.642	292	24.982	0	3	2	>Quantification	Q32Q12	Q32Q12			168910	113310	55595	5.22766	5.05427	4.74504	3	3	3	3	2	2	2	2	Q32Q12	0.176416	0.059709	0.135709	0.0722079	0.283911	0.272046	0.193487	0.0570595	0.143277	0.0766399
>Proteimics identification	477	Q8NBJ4-2	Q8NBJ4	GOLM1	Isoform 2 of Golgi membrane protein 1	628;1156	1734;1735;3147;3148	Q8NBJ4-2;Q8NBJ4	2	2	NO	5.9	5.9	44.272	391	18.887	0	2	2	>Quantification	Q8NBJ4-2	Q8NBJ4-2			165300	85105	80198	5.21827	4.92996	4.90416	2	2	2	2	2	2	2	2	Q8NBJ4-2	0.118727	0.124049	0.148312	0.10703	0.239954	0.261928	0.133876	0.128365	0.157807	0.115713
>Proteimics identification	426	P61769	P61769	B2M	Beta-2-microglobulin	1529;1799	4151;4152;4153;4154;4858;4859	P61769	2	2	NO	26.9	26.9	13.714	119	26.458	0	2	2	>Quantification	P61769	P61769			1161400	575290	586090	6.06498	5.75989	5.76796	3	3	3	3	3	3	2	2	P61769	0.108533	0.071287	0.14208	0.15722	0.192473	0.328408	0.13343	0.103846	0.187438	0.12516
>Proteimics identification	34	B8ZWD1	B8ZWD1	DBI	Acyl-CoA-binding protein	66;1344;1650;1860	168;169;3623;3624;3625;4428;4429;4430;5015	B8ZWD1;A0A0A0MTI5;P07108;P07108-3;P07108-2;P07108-4;P07108-5	4	4	NO	47.4	47.4	11.15	97	24.203	0	3	4	>Quantification	B8ZWD1	B8ZWD1			2561400	1039400	1522000	6.40848	6.01678	6.18241	4	4	4	4	5	5	5	5	B8ZWD1	0.128898	0.0956227	0.156905	0.117727	0.237217	0.263631	0.165047	0.0848717	0.171589	0.12705
>Proteimics identification	125	F5H3P4	F5H3P4	ACRBP	Acrosin-binding protein	559	1562;1563;1564;1565	F5H3P4;F5H2C2;F5H5S8;E7EP66;Q8NEB7	1	1	YES	10	10	10.881	100	7.0297	0	1	1	>Quantification	F5H3P4	F5H3P4			371530	160800	210730	5.56999	5.20629	5.32373	2	2	2	2	2	2	2	2	F5H3P4	0.477537	0.169812	0.231767	0.0127076	0.0314437	0.076733	0.395928	0.175417	0.233945	0.0303313
>Proteimics identification	318	P12429	P12429	ANXA3	Annexin A3	278;378;652;1464;1870	1073;1074;1781;1782;1783;3977;3978;5032;814	P12429	5	5	NO	20.7	20.7	36.375	323	42.929	0	4	4	>Quantification	P12429	P12429			296930	145900	151030	5.47265	5.16406	5.17906	4	4	4	4	5	5	4	4	P12429	0.119856	0.0406246	0.101951	0.303054	0.217151	0.217363	0.16592	0.0483282	0.145097	0.0634312
>Proteimics identification	444	Q02809	Q02809	PLOD1	Procollagen-lysine,2-oxoglutarate 5-dioxygenase 1	596;598;872;1154;1912	1646;1647;1650;2405;2406;2407;2408;3143;3144;5114;5115	Q02809;Q02809-2	5	5	NO	8.8	8.8	83.549	727	37.269	0	5	4	>Quantification	Q02809	Q02809			106500	54704	51799	5.02735	4.73802	4.71432	6	6	6	4	5	5	5	4	Q02809	0.0909927	0.123953	0.182056	0.101178	0.267141	0.234679	0.12895	0.128958	0.233114	0.127414
>Proteimics identification	419	P55268	P55268	LAMB2	Laminin subunit beta-2	112;299;757;759;1151;1212;1381;1383;1509;1635;1777;1930	2068;2071;275;3057;3058;3293;3752;3753;3754;3755;3757;3758;4113;4114;4398;4739;5154;5155;5156;5157;857;858	P55268	12	12	NO	9.7	9.7	195.98	1798	105.9	0	7	11	>Quantification	P55268	P55268			119310	52508	66802	5.07668	4.72023	4.82479	9	9	9	7	13	13	11	8	P55268	0.163333	0.0979899	0.145435	0.0939893	0.234782	0.264471	0.141033	0.09999	0.200801	0.0922395
>Proteimics identification	537	Q9Y3R5-2	Q9Y3R5	DOPEY2	Isoform 2 of Protein dopey-2	300;896;1124;1217;1265;1390;1624;1707	2460;2461;2989;2990;3310;3311;3312;3457;3770;4380;4381;4568;859;860	Q9Y3R5-2;Q9Y3R5	8	8	NO	5.3	5.3	257.39	2291	76.382	0	5	8	>Quantification	Q9Y3R5-2	Q9Y3R5-2			34673	15290	19383	4.53999	4.18441	4.28742	6	6	5	5	8	8	8	5	Q9Y3R5-2	0.174395	0.0531828	0.141891	0.0226319	0.278821	0.329079	0.212526	0.0689739	0.240404	0.0344747
>Proteimics identification	345	P19801	P19801	AOC1	Amiloride-sensitive amine oxidase [copper-containing]	71;72;145;967;1316;1848	180;181;182;183;184;2633;3565;3566;3567;3568;373;4982;4983;4984	P19801;P19801-2	6	6	NO	8.7	8.7	85.377	751	46.199	0	4	5	>Quantification	P19801	P19801			149860	85086	64774	5.17569	4.92986	4.8114	7	7	6	5	7	7	7	5	P19801	0.121851	0.039281	0.194046	0.0364217	0.311897	0.296504	0.208899	0.0338273	0.164543	0.0377726
>Proteimics identification	154	F5H423	F5H423	ARF1	Uncharacterized protein	235;902;1232;1274	2479;3345;3346;3347;3470;3471;668	F5H423;P84077;P61204	4	3	NO	20.5	15.2	23.346	210	64.501	0	3	2	>Quantification	F5H423	F5H423			111440	71469	39970	5.04704	4.85412	4.60173	3	3	3	3	4	3	2	2	F5H423	0.17109	0.0794879	0.128253	0.0784726	0.272172	0.270524	0.161278	0.0690461	0.143044	0.0640124
>Proteimics identification	147	E9PQS3	E9PQS3	APLP2	Amyloid-like protein 2 (Fragment)	208;1818	4906;4907;610;611;612;613	E9PQS3;Q06481-4;Q06481-2;Q06481-3;Q06481-6;Q06481	2	2	NO	15.2	15.2	17.822	158	11.689	0	2	2	>Quantification	E9PQS3	E9PQS3			697700	338020	359670	5.84367	5.52894	5.5559	3	3	3	3	3	3	2	2	E9PQS3	0.119871	0.0379022	0.124277	0.0560004	0.311058	0.350891	0.182158	0.0748486	0.155505	0.0737364
>Proteimics identification	319	P13473-2	P13473	LAMP2	Isoform LAMP-2B of Lysosome-associated membrane glycoprotein 2	212;493;705;1926	1363;1364;1944;1945;1946;1947;5141;5142;5143;5144;623;624	P13473-2;P13473;P13473-3	4	4	NO	11.7	11.7	44.955	410	63.232	0	4	4	>Quantification	P13473-2	P13473-2			1460900	685960	774920	6.16462	5.8363	5.88926	6	6	6	6	6	6	6	6	P13473-2	0.172106	0.0318944	0.170006	0.0284609	0.297679	0.299854	0.166826	0.0271917	0.200248	0.0305118
>Proteimics identification	275	P05155-2	P05155	SERPING1	Isoform 2 of Plasma protease C1 inhibitor	617;1041;1199;1672	1708;1709;2819;3256;4475;4476;4477	P05155-2;P05155;P05155-3	4	4	NO	10.5	10.5	49.757	448	26.454	0	4	2	>Quantification	P05155-2	P05155-2			209450	131280	78166	5.32108	5.1182	4.89302	5	5	5	5	2	2	2	2	P05155-2	0.142836	0.129186	0.352941	0.0827075	0.209246	0.0830839	0.136241	0.152206	0.325685	0.0815082
>Proteimics identification	65	A0A286YF22	A0A286YF22	PHGDH	D-3-phosphoglycerate dehydrogenase	302;413;781;1685;1820	1143;2154;4517;4912;4913;863	A0A286YF22;O43175	5	5	NO	13.3	13.3	55.938	526	32.239	0	3	3	>Quantification	A0A286YF22	A0A286YF22			74708	50477	24231	4.87337	4.70309	4.38437	3	3	2	2	3	3	3	3	A0A286YF22	0.167514	0.0861044	0.102815	0.0826647	0.255279	0.305622	0.110608	0.134376	0.150876	0.105789
>Proteimics identification	53	A0A0U1RQF0	A0A0U1RQF0	FASN	Fatty acid synthase	58;307;317;545;794;1161	1531;157;158;2188;2189;3157;874;875;876;877;892	A0A0U1RQF0;P49327	6	6	NO	3.1	3.1	273.2	2509	44.698	0	6	3	>Quantification	A0A0U1RQF0	A0A0U1RQF0			20790	14212	6578.8	4.31785	4.15266	3.81815	7	7	6	4	4	4	4	4	A0A0U1RQF0	0.150263	0.0861566	0.198752	0.0831635	0.232681	0.248984	0.223591	0.0701065	0.22762	0.0619384
>Proteimics identification	203	J3QRN2	J3QRN2	APOH	Beta-2-glycoprotein 1 (Fragment)	579;1632;1735;1878	1608;1609;4392;4393;4650;4651;5043;5044;5045;5046	J3QRN2;P02749	4	4	NO	40.9	40.9	19.907	181	55.655	0	4	4	>Quantification	J3QRN2	J3QRN2			395030	207160	187870	5.59663	5.31631	5.27386	5	5	3	3	5	5	3	3	J3QRN2	0.207107	0.0553466	0.136749	0.107464	0.256339	0.236994	0.201353	0.078877	0.109217	0.0889784
>Proteimics identification	413	P54107	P54107	CRISP1	Cysteine-rich secretory protein 1	131;1209;1243;1637;1846;1937	320;321;322;323;3279;3280;3281;3282;3416;4401;4402;4978;4979;5170;5171;5172;5173	P54107	6	6	NO	33.7	33.7	28.481	249	98.876	0	6	5	>Quantification	P54107	P54107			18205000	9434400	8771000	7.26019	6.97471	6.94305	9	9	9	7	8	8	8	6	P54107	0.174095	0.113094	0.306451	0.0769184	0.164501	0.16494	0.157568	0.128325	0.195358	0.10489
>Proteimics identification	336	P16870-2	P16870	CPE	Isoform 2 of Carboxypeptidase E	11;12;391;425;464;467;609;881;958;978;996;1102;1157;1181;1308;1527;1721;1722;1728;1915	1099;1100;1101;1102;1174;1175;1276;1277;1278;1279;1280;1286;1287;1680;1681;1682;1683;1684;2422;2423;2424;2425;2426;2427;2428;2429;2613;2654;2711;2712;29;2945;2946;30;31;3149;3150;32;3213;3214;33;3543;3544;3545;3546;4148;4149;4619;4620;4621;4622;4623;4636;4637;4638;4639;5122	P16870-2;P16870	20	20	NO	48.4	48.4	49.885	440	227.6	0	18	18	>Quantification	P16870-2	P16870-2			5709000	2928700	2780200	6.75656	6.46667	6.44408	31	31	31	24	26	26	25	21	P16870-2	0.202461	0.116822	0.126719	0.0744306	0.22922	0.249736	0.216513	0.0947095	0.144769	0.0850732
>Proteimics identification	281	P07195	P07195	LDHB	L-lactate dehydrogenase B chain	583;732;947;1072;1087;1508;1769	1616;2011;2012;2588;2890;2891;2917;4110;4111;4112;4727	P07195	7	6	NO	25.1	21.6	36.638	334	49.26	0	4	5	>Quantification	P07195	P07195			496710	230950	265760	5.6961	5.36352	5.42449	5	4	4	4	6	6	6	6	P07195	0.165496	0.0728169	0.182674	0.0916913	0.23287	0.254452	0.181119	0.071571	0.175547	0.0836252
>Proteimics identification	346	P20073-2	P20073	ANXA7	Isoform 2 of Annexin A7	680;1106	1874;1875;2950;2951	P20073-2;P20073	2	2	NO	5.2	5.2	50.315	466	15.082	0	2	2	>Quantification	P20073-2	P20073-2			45068	22545	22523	4.65387	4.35305	4.35263	2	2	2	2	2	2	2	2	P20073-2	0.149786	0.102518	0.148251	0.108403	0.246293	0.244749	0.215317	0.104424	0.0572045	0.0989668
>Proteimics identification	173	H0Y6T7	H0Y6T7	NCSTN	Nicastrin (Fragment)	1123;1303	2987;2988;3531	H0Y6T7;Q92542-2;Q92542	2	2	NO	7.3	7.3	30.045	275	12.132	0	2	1	>Quantification	H0Y6T7	H0Y6T7			48389	29459	18930	4.68475	4.46922	4.27715	2	2	2	2	1	1	1	1	H0Y6T7	0.164396	0.0478068	0.120995	0.0602346	0.269872	0.336695	0.201471	0.0471109	0.128895	0.0457177
>Proteimics identification	453	Q13217	Q13217	DNAJC3	DnaJ homolog subfamily C member 3	580;1077;1538;1616	1610;1611;2901;2902;4176;4177;4178;4366	Q13217	4	4	NO	9.9	9.9	57.579	504	27.02	0	4	3	>Quantification	Q13217	Q13217			95495	51837	43658	4.97998	4.71464	4.64006	4	4	4	4	4	4	3	3	Q13217	0.163253	0.126811	0.168837	0.147947	0.208994	0.184158	0.200698	0.104224	0.218452	0.125656
>Proteimics identification	213	O00194	O00194	RAB27B	Ras-related protein Rab-27B	140;1090;1908	2921;2922;343;344;345;346;347;348;349;350;351;352;353;354;355;356;357;358;359;360;361;362;5105;5106	O00194	3	3	NO	18.3	18.3	24.608	218	24.105	0	3	3	>Quantification	O00194	O00194			349240	194530	154710	5.54312	5.28899	5.18952	12	12	10	7	12	12	9	8	O00194	0.134171	0.0444958	0.083569	0.070047	0.272267	0.176775	0.132644	0.0437491	0.103602	0.0733068
>Proteimics identification	523	Q9UBX1	Q9UBX1	CTSF	Cathepsin F	1468;1570;1657	3986;3987;4260;4261;4440	Q9UBX1	3	3	NO	7.4	7.4	53.365	484	25.166	0	3	2	>Quantification	Q9UBX1	Q9UBX1			137080	77622	59460	5.13697	4.88998	4.77422	3	3	3	3	2	2	2	2	Q9UBX1	0.143046	0.150609	0.267419	0.148611	0.12892	0.161395	0.141773	0.161733	0.231527	0.144495
>Proteimics identification	252	P01037	P01037	CST1	Cystatin-SN	78;890;1380;1548	195;196;197;198;2450;2451;3750;3751;4204;4205	P01037	4	2	NO	44.7	24.1	16.387	141	16.315	0	2	2	>Quantification	P01037	P01037			365780	192000	173790	5.56322	5.2833	5.24002	5	2	2	2	5	2	2	2	P01037	0.0993768	0.0582082	0.150569	0.0559004	0.230243	0.405703	0.0172716	0.0819733	0.0214696	0.0184042
>Proteimics identification	255	P01834	P01834	IGKC	Immunoglobulin kappa constant	345;1487;1700;1741	4026;4027;4028;4547;4548;4549;4550;4551;4552;4663;961;962;963	P01834	4	4	NO	63.6	63.6	11.765	107	121.48	0	3	4	>Quantification	P01834	P01834			5109300	2336500	2772800	6.70836	6.36857	6.44292	7	7	6	5	6	6	6	5	P01834	0.203439	0.0647902	0.120441	0.0773486	0.295632	0.238349	0.163649	0.0536999	0.140299	0.103449
>Proteimics identification	450	Q08380	Q08380	LGALS3BP	Galectin-3-binding protein	4;87;122;471;761;965;1433;1462;1566;1664;1953;1976	10;11;12;1292;1293;1294;13;14;15;16;2073;2074;2075;2076;2077;212;213;2625;2626;2627;2628;297;298;299;3885;3886;3972;3973;4254;4453;4454;4455;4456;5218;5274;5275;5276;5277;7;8;9	Q08380	12	12	NO	34.7	34.7	65.33	585	192.13	0	11	9	>Quantification	Q08380	Q08380			5616900	3486700	2130200	6.7495	6.54241	6.32842	23	23	18	14	18	18	13	11	Q08380	0.183846	0.0642854	0.168766	0.0637839	0.245741	0.238979	0.20963	0.0898209	0.161257	0.0884674
>Proteimics identification	463	Q16568	Q16568	CARTPT	Cocaine- and amphetamine-regulated transcript protein	461;785	1268;2168;2169	Q16568	2	2	NO	18.1	18.1	12.829	116	11.294	0	2	1	>Quantification	Q16568	Q16568			631420	371650	259760	5.80032	5.57013	5.41457	2	2	1	1	1	1	1	1	Q16568	0.150506	0.204813	0.435151	0.0686277	0.0458614	0.0950412	0.145604	0.218864	0.464026	0.0623791
>Proteimics identification	71	P61224-2	P61224	RAP1B	Isoform 2 of Ras-related protein Rap-1b	918;1450	2506;2507;2508;3940;3941	P61224-2;P61224-3;P62834;P61224;A6NIZ1	2	2	NO	19.7	19.7	15.356	137	23.993	0	2	2	>Quantification	P61224-2	P61224-2			269690	70688	199000	5.43086	4.84935	5.29885	2	2	2	2	3	3	3	3	P61224-2	0.190972	0.0575273	0.0868502	0.0740463	0.276779	0.313826	0.141561	0.0325399	0.109673	0.0390439
>Proteimics identification	228	O43692	O43692	PI15	Peptidase inhibitor 15	595;743;1918	1645;2033;2034;5129;5130	O43692	3	2	NO	14.3	10.5	29.065	258	32.719	0	1	2	>Quantification	O43692		O43692	O43692	137980	45190	92795	5.13982	4.65504	4.96752	1	1	1	1	4	2	2	2	O43692	0	3.78e-06	0	0.0862362	0.298272	0.615487	0.0476093	0.0197028	0.0453353	0.0570673
>Proteimics identification	369	P30041	P30041	PRDX6	Peroxiredoxin-6	255;274;577;1071;1331;1839;1842	1605;1606;2888;2889;3598;3599;4962;4963;4970;709;710;807;808	P30041	7	7	NO	44.6	44.6	25.035	224	48.048	0	6	6	>Quantification	P30041	P30041			401070	187780	213300	5.60322	5.27365	5.32899	6	6	5	5	7	7	6	5	P30041	0.143541	0.0792799	0.199109	0.0658123	0.251496	0.260762	0.137709	0.102063	0.213327	0.0887342
>Proteimics identification	202	J3KPS3	J3KPS3	ALDOA	Fructose-bisphosphate aldolase	9;20;68;90;620;704;804;1342;1389	171;1714;172;173;174;1942;1943;2206;222;223;26;27;3620;3769;50	J3KPS3;P04075	9	9	NO	30.4	30.4	39.817	368	58.606	0	8	5	>Quantification	J3KPS3	J3KPS3			993660	647270	346390	5.99724	5.81109	5.53957	9	9	9	7	6	6	6	5	J3KPS3	0.197448	0.0996828	0.154831	0.118947	0.219437	0.209654	0.221001	0.0956288	0.158662	0.123068
>Proteimics identification	411	P52907	P52907	CAPZA1	F-actin-capping protein subunit alpha-1	587;1110	1624;2959	P52907	2	2	NO	9.8	9.8	32.922	286	11.408	0	2	0	>Quantification	P52907			P52907	55767	55767	0	4.74638	4.74638	#NUM!	2	2	2	2	0	0	0	0	P52907	0.166107	0.109372	0.123757	0.110307	0.238691	0.251766
>Proteimics identification	498	Q96S96	Q96S96	PEBP4	Phosphatidylethanolamine-binding protein 4	608;847;944;1845;1945	1679;2343;2344;2345;2581;2582;2583;4976;4977;5191;5192;5193;5194	Q96S96	5	5	NO	26.4	26.4	25.733	227	40.913	0	4	5	>Quantification	Q96S96	Q96S96			3875400	2244000	1631400	6.58832	6.35102	6.21256	7	7	7	6	6	6	6	5	Q96S96	0.230427	0.0234292	0.0925759	0.0428248	0.147096	0.463648	0.239831	0.0240724	0.0705527	0.0331999
>Proteimics identification	513	Q9HC84	Q9HC84	MUC5B	Mucin-5B	35;110;460	1266;1267;270;77	Q9HC84	3	3	NO	1.8	1.8	596.33	5762	21.499	0	1	3	>Quantification	Q9HC84				3302.3	1565.6	1736.7	3.51882	3.19468	3.23972	1	1	1	1	3	3	1	1	Q9HC84	0.293299	0.15553	0.33468	0	0	0.216491	0.271175	0.0924184	0.167476	0.0779659
>Proteimics identification	518	Q9NZ53	Q9NZ53	PODXL2	Podocalyxin-like protein 2	747	2041;2042	Q9NZ53	1	1	YES	2.3	2.3	65.075	605	7.3159	0	1	1	>Quantification	Q9NZ53				3931.7	1910.7	2021	3.59458	3.28119	3.30557	1	1	1	1	1	1	1	1	Q9NZ53	0.284927	0.157471	0.276326	0.195693	0	0.085583	0.308611	0.17765	0.169387	0.258173
>Proteimics identification	238	O95716	O95716	RAB3D	Ras-related protein Rab-3D	1006;1109;1192;1434;1891	2729;2730;2731;2732;2733;2955;2956;2957;2958;3237;3887;5074	O95716	5	3	NO	24.7	12.3	24.267	219	46.509	0	3	2	>Quantification	O95716	O95716			622820	322150	300670	5.79436	5.50806	5.47809	6	6	5	5	6	4	4	4	O95716	0.185772	0.0596565	0.135107	0.0491475	0.285582	0.284734	0.150723	0.0744507	0.157521	0.0739453
>Proteimics identification	374	P30086	P30086	PEBP1	Phosphatidylethanolamine-binding protein 1	186;1226;1306;1967;1968	3327;3328;3329;3330;3537;3538;5256;5257;5258;5259;561	P30086	5	5	NO	27.3	27.3	21.057	187	41.467	0	4	4	>Quantification	P30086	P30086			1208000	637940	570070	6.08207	5.80478	5.75593	5	5	5	5	6	6	6	5	P30086	0.176641	0.0919374	0.16964	0.0959376	0.234769	0.231074	0.149336	0.0913417	0.132194	0.141206
>Proteimics identification	342	P19075	P19075	TSPAN8	Tetraspanin-8	1120;1363	2981;2982;3682;3683;3684	P19075	2	2	NO	10.1	10.1	26.044	237	14.905	0	2	2	>Quantification	P19075	P19075			506070	271930	234140	5.70421	5.43446	5.36948	3	3	2	2	2	2	2	2	P19075	0.17522	0.0754142	0.126394	0.0744791	0.263995	0.284499	0.167779	0.101006	0.130351	0.0708443
>Proteimics identification	375	P30101	P30101	PDIA3	Protein disulfide-isomerase A3	470;685;1174	1290;1291;1884;3200	P30101	3	3	NO	6.7	6.7	56.782	505	20.86	0	1	3	>Quantification	P30101	P30101			29637	9007.4	20630	4.47183	3.9546	4.3145	1	1	1	1	3	3	3	3	P30101	0.19507	0.160626	0.278047	0.0710714	0.145016	0.15017	0.207468	0.165945	0.264279	0.0833438
>Proteimics identification	376	P31025	P31025	LCN1	Lipocalin-1	731;1295	2009;2010;3516;3517;3518	P31025	2	2	NO	12.5	12.5	19.25	176	13.842	0	2	2	>Quantification	P31025	P31025			257070	142420	114650	5.41005	5.15357	5.05937	3	3	3	3	2	2	2	2	P31025	0.559944	0.0878015	0.116291	0.0616913	0.0635615	0.110711	0.518706	0.109107	0.11757	0.0684923
>Proteimics identification	451	Q12805-2	Q12805	EFEMP1	Isoform 2 of EGF-containing fibulin-like extracellular matrix protein 1	469;766;1126;1578	1289;2089;2090;2091;2092;2992;4278;4279	Q12805-2;Q12805-4;Q12805-3;Q12805	4	4	NO	11.3	11.3	53.722	485	57.373	0	3	3	>Quantification	Q12805-2	Q12805-2			163500	91904	71592	5.21352	4.96333	4.85486	4	4	4	4	4	4	4	4	Q12805-2	0.104772	0.0476669	0.0830937	0.0562268	0.490735	0.217506	0.117059	0.0515592	0.158823	0.0610997
>Proteimics identification	91	B7ZBJ4	B7ZBJ4	CAB39L	Calcium-binding protein 39-like	1076	2899;2900	B7ZBJ4;Q5TAW7;Q9H9S4	1	1	YES	5.2	5.2	22.957	193	6.5576	0.004158	1	1	>Quantification	B7ZBJ4				16225	8695.2	7530.2	4.21018	3.93928	3.87681	1	1	1	1	1	1	1	1	B7ZBJ4	0.161898	0	0	0.0842697	0.381756	0.372075	0.191593	0.0516917	0	0.0971828
>Proteimics identification	495	Q96HR9-2	Q96HR9	REEP6	Isoform 2 of Receptor expression-enhancing protein 6	1290	3505;3506	Q96HR9-2;Q96HR9	1	1	YES	7.1	7.1	20.733	184	6.2166	0.0095602	1	1	>Quantification	Q96HR9-2				12911	6399.9	6510.9	4.11096	3.80617	3.81364	1	1	1	1	1	1	1	1	Q96HR9-2	0.494071	0	0.504267	0	0.00165829	2.93e-06	1.62e-05	0	0.996781	0
>Proteimics identification	383	P34096	P34096	RNASE4	Ribonuclease 4	605;1445;1490;1840	1671;1672;1673;3929;3930;4063;4964;4965;4966;4967	P34096	4	4	NO	28.6	28.6	16.84	147	43.779	0	4	3	>Quantification	P34096	P34096			2337800	1339900	997870	6.36881	6.12707	5.99907	6	6	6	4	4	4	4	4	P34096	0.154225	0.0727886	0.188752	0.0564024	0.268331	0.259502	0.118855	0.0966956	0.20251	0.0804131
>Proteimics identification	97	C9JBL4	C9JBL4	GLRA2	Glycine receptor subunit alpha-2 (Fragment)	1280	3482;3483	C9JBL4	1	1	YES	5.1	5.1	24.655	215	6.3639	0.0059761	1	1	>Quantification	C9JBL4	C9JBL4			13036000	7175200	5860900	7.11514	6.85583	6.76796	1	1	1	1	1	1	1	1	C9JBL4	0.164783	0.24833	0.196728	0.182132	0.120018	0.0880087	0.163949	0.232033	0.200721	0.196402
>Proteimics identification	116	D6RI10	D6RI10	SPINK2	Serine protease inhibitor Kazal-type 2	109	266;267;268;269	D6RI10	1	1	YES	17.9	17.9	13.891	134	14.412	0	1	1	>Quantification	D6RI10				399030	200360	198670	5.60101	5.30181	5.29813	2	2	1	1	2	2	1	1	D6RI10	0.253273	0.310486	0.193765	0.241573	0	0.000902811	0.414611	0.345014	0	0.239548
>Proteimics identification	505	Q9BWD1	Q9BWD1	ACAT2	Acetyl-CoA acetyltransferase, cytosolic	910	2493;2494	Q9BWD1;Q9BWD1-2	1	1	YES	2.8	2.8	41.35	397	7.772	0	1	1	>Quantification	Q9BWD1		Q9BWD1		14223	6700.4	7522.6	4.15299	3.8261	3.87637	1	1	1	1	1	1	1	1	Q9BWD1	0	3.54e-07	0	0	0.561367	0.438633	6.75e-10	0	4.15e-05	0
>Proteimics identification	254	P01833	P01833	PIGR	Polymeric immunoglobulin receptor	23;215;1247;1709;1925	3421;4576;4577;4578;5140;53;54;55;629;630	P01833	5	5	NO	10.9	10.9	83.283	764	42.525	0	5	3	>Quantification	P01833	P01833			182610	128890	53713	5.26152	5.11022	4.73008	7	7	6	6	3	3	3	3	P01833	0.626869	0.0281951	0.0511583	0.0620664	0.145464	0.0862471	0.709513	0.026446	0.0305261	0.0374461
>Proteimics identification	296	P08294	P08294	SOD3	Extracellular superoxide dismutase [Cu-Zn]	156;241;1004;1824	2726;2727;485;486;487;488;4921;681	P08294	4	4	NO	26.7	26.7	25.851	240	43.876	0	3	3	>Quantification	P08294	P08294			1253500	596760	656780	6.09812	5.7758	5.81742	4	4	3	3	4	4	3	3	P08294	0.137054	0.124389	0.156759	0.110695	0.185437	0.285668	0.1358	0.14257	0.113996	0.102288
>Proteimics identification	171	G5E9W0	G5E9W0	PLA1A	Phospholipase A1 member A	174;202;543;877;1030	1526;2415;2416;2791;2792;522;523;598;599;600;601	G5E9W0;Q53H76-3;Q53H76	5	5	NO	16.6	16.6	48.084	440	61.308	0	5	4	>Quantification	G5E9W0	G5E9W0			387510	214100	173410	5.58828	5.33062	5.23907	6	6	6	6	5	5	5	5	G5E9W0	0.143948	0.131003	0.279156	0.100538	0.154207	0.191148	0.151009	0.128507	0.260239	0.114165
>Proteimics identification	393	P41250	P41250	GARS	Glycine--tRNA ligase	1621	4375;4376	P41250	1	1	YES	1.8	1.8	83.165	739	6.3766	0.005988	1	1	>Quantification	P41250				3164.3	1168	1996.3	3.50028	3.06744	3.30023	1	1	1	1	1	1	1	1	P41250	0.430785	0	0.567341	0	0.00187075	3.18e-06	0.288586	0.114847	0.280099	0
>Proteimics identification	21	A0A087X1N4	A0A087X1N4	SYTL1	Synaptotagmin-like protein 1	725;906	1994;1995;2486;2487	A0A087X1N4;Q8IYJ3-2;Q8IYJ3	2	2	NO	3.8	3.8	54.506	497	12.392	0	2	2	>Quantification	A0A087X1N4	A0A087X1N4			84852	44126	40726	4.92866	4.64469	4.60987	2	2	2	2	2	2	2	2	A0A087X1N4	0.181625	0.0706166	0.123481	0.0687254	0.301977	0.253575	0.191021	0.0801871	0.134439	0.0686318
>Proteimics identification	379	P31949	P31949	S100A11	Protein S100-A11	194;1615	4362;4363;4364;4365;576;577;578;579	P31949	2	2	NO	25.7	25.7	11.74	105	42.565	0	2	2	>Quantification	P31949	P31949			1978500	1113200	865280	6.29634	6.04657	5.93716	5	5	5	4	3	3	3	3	P31949	0.195634	0.0569841	0.124884	0.085528	0.325193	0.221857	0.182216	0.0551268	0.107807	0.0836759
>Proteimics identification	432	P62937	P62937	PPIA	Peptidyl-prolyl cis-trans isomerase A	552;888;938;977;1801	1547;1548;2443;2444;2569;2652;2653;4862;4863;4864	P62937	5	5	NO	31.5	31.5	18.012	165	51.789	0	5	4	>Quantification	P62937	P62937			808810	441100	367700	5.90785	5.64454	5.56549	5	5	5	4	5	5	5	4	P62937	0.119296	0.11779	0.143361	0.0532747	0.212915	0.353362	0.152457	0.0470363	0.21288	0.0379937
>Proteimics identification	323	P13796	P13796	LCP1	Plastin-2	173;622;667;930;1128;1365;1742;1798;1855;1894;1957	1719;1809;1810;2535;2536;2994;2995;2996;2997;3686;4664;4665;4666;4856;4857;5001;5002;5003;5004;5079;5080;520;521;5225;5226	P13796	11	10	NO	23.3	21.9	70.288	627	104.73	0	9	9	>Quantification	P13796	P13796			478700	272120	206580	5.68006	5.43476	5.31509	13	12	10	8	12	11	10	8	P13796	0.153415	0.0500447	0.232155	0.0669422	0.221374	0.27607	0.123971	0.0571077	0.186996	0.0654966
>Proteimics identification	280	P06858	P06858	LPL	Lipoprotein lipase	114;210;483;937;1175;1188;1425;1495	1322;1323;1324;1325;2565;2566;2567;2568;278;3201;3202;3203;3226;3227;3866;3867;4075;4076;618	P06858	8	8	NO	20.6	20.6	53.162	475	113.09	0	7	7	>Quantification	P06858	P06858			758520	448040	310480	5.87997	5.65132	5.49203	10	10	10	8	9	9	9	8	P06858	0.190868	0.144015	0.0957277	0.301733	0.0907076	0.176949	0.183061	0.130289	0.11674	0.247473
>Proteimics identification	245	P01009	P01009	SERPINA1	Alpha-1-antitrypsin	148;349;357;455;604;778;942;1063;1153;1173;1180;1220;1221;1372;1574;1661;1759	1248;1668;1669;1670;2145;2146;2147;2148;2149;2575;2576;2577;2578;2867;3142;3196;3197;3198;3199;3210;3211;3212;3317;3318;3319;3730;379;380;381;382;4269;4270;4271;4449;4450;4699;4700;4701;4702;4703;970;971;972;987;988	P01009	17	17	NO	51.4	51.4	46.736	418	236.59	0	14	15	>Quantification	P01009	P01009			7281900	3998100	3283800	6.86224	6.60185	6.51638	22	22	19	15	23	23	17	13	P01009	0.148735	0.127411	0.300287	0.109136	0.245881	0.0685511	0.180642	0.144313	0.2789	0.12264
>Proteimics identification	251	P01036	P01036	CST4	Cystatin-S	78;889;987;1379;1548	195;196;197;198;2445;2446;2447;2448;2449;2683;3747;3748;3749;4204;4205	P01036	5	3	NO	44.7	24.1	16.214	141	67.657	0	2	3	>Quantification	P01036	P01036			3802500	1644300	2158200	6.58007	6.21598	6.33409	7	4	4	4	8	5	5	4	P01036	0.00714638	0.0513872	0.891697	0.00726184	0.014858	0.0293157	0.0248032	0.0502587	0.822012	0.0151166
>Proteimics identification	309	P11021	P11021	HSPA5	Endoplasmic reticulum chaperone BiP	64;316;868;886;943;992;1461;1542;1618;1710	166;2399;2400;2437;2438;2579;2580;2693;3971;4183;4369;4579;4580;891	P11021	10	9	NO	20.5	18	72.332	654	70.355	0	7	4	>Quantification	P11021	P11021			209780	144430	65354	5.32176	5.15966	4.81527	9	8	8	5	5	4	4	4	P11021	0.160534	0.154531	0.230311	0.0973587	0.179608	0.177657	0.17994	0.175977	0.254641	0.104896
>Proteimics identification	363	P27348	P27348	YWHAQ	14-3-3 protein theta	153;1283;1491;1592	3492;3493;4064;4065;4066;4067;430;4314;4315	P27348	4	3	NO	21.6	18.4	27.764	245	42.75	0	3	2	>Quantification	P27348	P27348			165000	98407	66597	5.21748	4.99303	4.82345	5	4	4	4	4	3	3	3	P27348	0.10656	0.0493598	0.204558	0.0325678	0.337547	0.269409	0.18297	0.0664152	0.17712	0.0515028
>Proteimics identification	51	A0A0J9YVZ3	A0A0J9YVZ3	MGAM	Maltase-glucoamylase, intestinal (Fragment)	170;436;535;1040;1382;1884;1956	1196;1197;1510;1511;2817;2818;3756;5055;5056;5057;513;514;5224	A0A0J9YVZ3;E7ER45	7	7	NO	6.9	6.9	228.96	2012	44.657	0	6	6	>Quantification	A0A0J9YVZ3	A0A0J9YVZ3			84532	43457	41075	4.92702	4.63806	4.61358	6	6	6	4	7	7	7	6	A0A0J9YVZ3	0.269618	0.0950199	0.196894	0.0916026	0.175117	0.171748	0.219947	0.119049	0.271525	0.0805259
>Proteimics identification	534	Q9Y265	Q9Y265	RUVBL1	RuvB-like 1	1598;1954	4332;5219	Q9Y265	2	2	NO	6.1	6.1	50.227	456	11.846	0	1	1	>Quantification	Q9Y265				2945.8	2945.8	0	3.4692	3.4692	#NUM!	1	1	1	1	1	1	1	1	Q9Y265	0.379216	0	0.618737	0	0.00204389	3.38e-06	0.238732	0.13445	0.395652	0
>Proteimics identification	501	Q99985-2	Q99985	SEMA3C	Isoform 2 of Semaphorin-3C	1190	3230;3231;3232	Q99985-2;Q99985	1	1	YES	12.9	12.9	26.254	233	18.4	0	1	1	>Quantification	Q99985-2		Q99985-2	Q99985-2	69767	48737	21030	4.84365	4.68786	4.32284	2	2	1	1	1	1	1	1	Q99985-2	0	2.32e-07	0	0	0.377444	0.622556	0.109667	0.0444411	0.171208	0
>Proteimics identification	471	Q6UW15	Q6UW15	REG3G	Regenerating islet-derived protein 3-gamma	164;1208	3276;3277;3278;502;503	Q6UW15	2	2	NO	18.3	18.3	19.33	175	17.582	0	2	2	>Quantification	Q6UW15	Q6UW15			226080	111350	114730	5.35426	5.04669	5.05968	3	3	3	3	2	2	2	2	Q6UW15	0.076681	0.1089	0.142658	0.348335	0.172725	0.150701	0.0627998	0.5871	0.0668761	0.0937488
>Proteimics identification	264	P03950	P03950	ANG	Angiogenin	275;1326	3591;3592;809	P03950	2	2	NO	21.1	21.1	16.55	147	15.041	0	2	1	>Quantification	P03950	P03950			151100	89395	61707	5.17926	4.95131	4.79033	2	2	2	2	1	1	1	1	P03950	0.110369	0.142813	0.15432	0.0962659	0.275494	0.220739	0.155132	0.119776	0.117115	0.103049
>Proteimics identification	443	Q02487-2	Q02487	DSC2	Isoform 2B of Desmocollin-2	1481	4014;4015	Q02487-2;Q02487	1	1	YES	1.7	1.7	93.768	847	8.7416	0	1	1	>Quantification	Q02487-2	Q02487-2			78880	31390	47490	4.89697	4.49679	4.6766	1	1	1	1	1	1	1	1	Q02487-2	0.160337	0.0938245	0.0899228	0.113387	0.265443	0.277086	0.142826	0.079601	0.147702	0.0967126
>Proteimics identification	29	A0A0A0MSI0	A0A0A0MSI0	PRDX1	Peroxiredoxin-1 (Fragment)	129;720;1204;1374;1642	1977;1978;1979;1980;317;3264;3265;3266;3267;3737;4410	A0A0A0MSI0;Q06830	5	3	NO	29.2	18.1	18.976	171	34.712	0	2	2	>Quantification	A0A0A0MSI0	A0A0A0MSI0			637010	233310	403690	5.80415	5.36793	5.60605	5	5	5	5	6	5	5	5	A0A0A0MSI0	0.195947	0.0784371	0.127192	0.0914063	0.237199	0.269819	0.189891	0.0757681	0.115341	0.0921125
>Proteimics identification	5	V9HW75	V9HW75	NUCB2	Epididymis secretory protein Li 109	13;333;454;527;864;1037;1046;1065;1211;1411;1412	1247;1483;1484;1485;2390;2391;2392;2393;2812;2813;2828;2829;2830;2870;2871;2872;2873;2874;3289;3290;3291;3292;34;3819;3820;3821;3822;3823;936	V9HW75;A0A087WSV8;P80303-2;P80303	11	11	NO	30.7	30.7	50.222	420	131.29	0	9	10	>Quantification	V9HW75	V9HW75			2877100	1447500	1429700	6.45895	6.16062	6.15524	15	15	15	13	14	14	13	11	V9HW75	0.173397	0.162884	0.206647	0.284755	0.0828836	0.0817517	0.205029	0.146372	0.16101	0.292366
>Proteimics identification	381	P33176	P33176	KIF5B	Kinesin-1 heavy chain	519;931;1454	1462;1463;2537;2538;2539;3947	P33176	3	3	NO	4.4	4.4	109.68	963	23.722	0	3	2	>Quantification	P33176	P33176			23177	11696	11481	4.36506	4.06804	4.05998	3	3	3	3	3	3	3	3	P33176	0.141682	0.0642747	0.197033	0.0534233	0.260354	0.283233	0.142186	0.0534956	0.19471	0.0659092
>Proteimics identification	368	P29622	P29622	SERPINA4	Kallistatin	647;665	1776;1806;1807	P29622	2	2	NO	6.1	6.1	48.541	427	11.736	0	2	1	>Quantification	P29622				27032	16711	10321	4.43188	4.223	4.01372	2	2	2	2	1	1	1	1	P29622	0.170973	0.159205	0.22734	0.18685	0.120918	0.134713	0.119012	0.212444	0.224252	0.264318
>Proteimics identification	149	F2Z2C0	F2Z2C0	DIS3	Exosome complex exonuclease RRP44	1240	3409;3410;3411;3412;3413	F2Z2C0;G3V1J5;Q9Y2L1-2;Q9Y2L1	1	1	YES	3	3	63.616	559	-2	1	1	1	>Quantification	F2Z2C0	F2Z2C0			1236100	147140	1088900	6.09205	5.16773	6.03699	2	2	2	2	3	3	3	3	F2Z2C0	0.0983627	0.213604	0.517001	0.0816729	0.067501	0.021859	0.101963	0.24948	0.433537	0.111667
>Proteimics identification	174	H0YBX3	H0YBX3	RIDA	2-iminobutanoate/2-iminopropanoate deaminase (Fragment)	862	2387;2388	H0YBX3;H0YB34;P52758	1	1	YES	13.4	13.4	13.715	127	6.3858	0.0060241	1	1	>Quantification	H0YBX3				17134	10431	6703.8	4.23386	4.01833	3.82632	1	1	1	1	1	1	1	1	H0YBX3	0	0.335334	0.662229	0	0.00243692	0	0	0.201819	0.447794	0.160392
>Proteimics identification	258	P02750	P02750	LRG1	Leucine-rich alpha-2-glycoprotein	478;756;1068;1651	1311;1312;2066;2067;2880;2881;4431;4432	P02750	4	4	NO	14.4	14.4	38.177	347	53.086	0	4	4	>Quantification	P02750	P02750			202680	108040	94636	5.30681	5.03358	4.97606	4	4	4	4	4	4	4	4	P02750	0.165649	0.121249	0.16971	0.125991	0.261257	0.156143	0.129432	0.139937	0.12283	0.148781
>Proteimics identification	256	P02647	P02647	APOA1	Apolipoprotein A-I	284;1097;1817	2939;4902;4903;4904;4905;825	P02647	3	3	NO	13.9	13.9	30.777	267	43.587	0	3	1	>Quantification	P02647	P02647			71329	45338	25991	4.85327	4.65646	4.41482	4	4	4	4	2	2	2	2	P02647	0.192087	0.109646	0.136253	0.111726	0.266852	0.183436	0.186342	0.101845	0.170858	0.116331
>Proteimics identification	183	H3BS10	H3BS10	HEXA	Beta-hexosaminidase	84;297;718;814;926;935	1971;1972;1973;1974;206;207;208;209;2224;2225;2527;2528;2529;2530;2560;851;852	H3BS10;H3BP20;P06865	6	6	NO	12.6	12.6	58.44	509	51.845	0	5	6	>Quantification	H3BS10	H3BS10			436210	201980	234230	5.6397	5.30531	5.36964	8	8	8	6	9	9	9	8	H3BS10	0.222	0.134453	0.208391	0.0845539	0.160725	0.189877	0.195603	0.111928	0.241951	0.109972
>Proteimics identification	458	Q14508	Q14508	WFDC2	WAP four-disulfide core domain protein 2	181;182;329;428	1179;1180;1181;1182;546;547;548;549;550;551;552;553;916;917;918;919;920;921;922;923;924;925;926;927;928;929	Q14508	4	4	NO	38.7	38.7	12.993	124	91.594	0	4	4	>Quantification	Q14508	Q14508			16796000	8694100	8101500	7.22521	6.93922	6.90857	12	12	11	7	14	14	12	10	Q14508	0.118103	0.111279	0.365388	0.0638668	0.20734	0.140865	0.130776	0.0941309	0.365994	0.0544921
>Proteimics identification	216	O00391-2	O00391	QSOX1	Isoform 2 of Sulfhydryl oxidase 1	163;367;631;812;963;976;1010;1039;1293;1451;1784	1018;1019;1742;1743;2220;2221;2622;2650;2651;2747;2748;2816;3511;3512;3513;3514;3942;3943;4753;500;501	O00391-2;O00391	11	11	NO	26.7	26.7	66.86	604	107.05	0	9	9	>Quantification	O00391-2	O00391-2			403660	195830	207840	5.60602	5.29188	5.31773	11	11	11	9	10	10	10	7	O00391-2	0.160099	0.0977043	0.163533	0.0990789	0.289966	0.189618	0.170112	0.129583	0.209643	0.113255
>Proteimics identification	244	P00918	P00918	CA2	Carbonic anhydrase 2	1838	4960;4961	P00918	1	1	YES	3.5	3.5	29.246	260	6.8224	0	1	1	>Quantification	P00918	P00918			48532	22624	25907	4.68603	4.35457	4.41342	1	1	1	1	1	1	1	1	P00918	0.233411	0.0933489	0.4074	0.0770688	0.0695409	0.11923	0.235893	0.10799	0.393212	0.0712818
>Proteimics identification	98	C9JF17	C9JF17	APOD	Apolipoprotein D (Fragment)	216;1272	3466;3467;631	C9JF17;P05090	2	2	NO	11.6	11.6	24.158	215	13.549	0	2	1	>Quantification	C9JF17	C9JF17			199830	149760	50077	5.30066	5.1754	4.69964	2	2	2	2	1	1	1	1	C9JF17	0.157997	0.091157	0.147261	0.101132	0.261077	0.241376	0.141019	0.0780565	0.0893662	0.0921962
>Proteimics identification	380	P32119	P32119	PRDX2	Peroxiredoxin-2	130;424;1170;1374	1172;1173;3173;3174;318;319;3737	P32119	4	3	NO	23.7	18.2	21.892	198	18.625	0	3	2	>Quantification	P32119	P32119			594520	468240	126280	5.77417	5.67047	5.10133	4	4	4	4	3	2	2	2	P32119	0.142932	0.113285	0.166733	0.0890154	0.247739	0.240295	0.0873989	0.164862	0.170896	0.100565
>Proteimics identification	103	C9JKZ3	C9JKZ3	TMPRSS2	Transmembrane protease serine 2 (Fragment)	169;1219;1294;1687	3315;3316;3515;4519;512	C9JKZ3;O15393;O15393-2	4	4	NO	12.5	12.5	53.615	489	50.241	0	2	3	>Quantification	C9JKZ3	C9JKZ3			232220	21695	210520	5.3659	4.33636	5.32329	2	2	2	2	3	3	3	3	C9JKZ3	0.29838	0.188209	0.191787	0.0295532	0.126006	0.166065	0.232986	0.102656	0.138981	0.0478225
>Proteimics identification	389	P40189	P40189	IL6ST	Interleukin-6 receptor subunit beta	895;1459	2458;2459;3968	P40189	2	2	NO	3.6	3.6	103.54	918	19.832	0	2	1	>Quantification	P40189	P40189			16198	10367	5830.8	4.20946	4.01565	3.76573	2	2	2	2	1	1	1	1	P40189	0.169022	0.0664949	0.151162	0.0763727	0.212097	0.324852	0.187841	0.0608926	0.147492	0.0753334
>Proteimics identification	40	F8VV32	F8VV32	LYZ	Lysozyme	1559	4241	F8VV32;A0A0B4J259;P61626	1	1	YES	11.5	11.5	11.488	104	8.9852	0	1	0	>Quantification	F8VV32			F8VV32	43160	43160	0	4.63508	4.63508	#NUM!	1	1	1	1	0	0	0	0	F8VV32	0.156383	0.0615082	0.0747535	0.0930089	0.25363	0.360715
>Proteimics identification	516	Q9NR45	Q9NR45	NANS	Sialic acid synthase	810;1337	2214;2215;2216;2217;3608;3609;3610;3611	Q9NR45	2	2	NO	7.8	7.8	40.307	359	19.087	0	2	2	>Quantification	Q9NR45	Q9NR45			80602	43755	36846	4.90635	4.64103	4.56639	4	4	4	4	4	4	4	4	Q9NR45	0.122097	0.0700556	0.149363	0.0644407	0.22302	0.371024	0.178756	0.0805329	0.155736	0.077798
>Proteimics identification	313	P11717	P11717	IGF2R	Cation-independent mannose-6-phosphate receptor	134;521;1656;1813;1960	1468;1469;328;4439;4886;5233;5234;5235;5236	P11717	5	5	NO	2.6	2.6	274.37	2491	61.005	0	3	4	>Quantification	P11717	P11717			12955	7072.2	5883.2	4.11244	3.84955	3.76961	4	4	4	4	5	5	5	5	P11717	0.194302	0.0508894	0.134191	0.0361188	0.202124	0.382374	0.198431	0.0402338	0.0977998	0.0451023
>Proteimics identification	158	F5H5G1	F5H5G1	LSAMP	Limbic system-associated membrane protein	7;189;417;917;1690;1744	1151;1152;1153;1154;21;22;2505;4527;4671;4672;564;565	F5H5G1;H3BLU2;Q13449	6	6	NO	29.5	29.5	31.741	288	87.783	0	6	4	>Quantification	F5H5G1	F5H5G1			845530	509930	335600	5.92713	5.70751	5.52582	7	7	7	6	5	5	5	4	F5H5G1	0.244988	0.064544	0.110868	0.0684088	0.269906	0.241286	0.165102	0.0670224	0.142316	0.0689348
>Proteimics identification	350	P20337	P20337	RAB3B	Ras-related protein Rab-3B	754;1892	2054;2055;2056;2057;2058;2059;5075;5076	P20337	2	2	NO	16.9	16.9	24.758	219	25.998	0	2	2	>Quantification	P20337	P20337			470620	246850	223770	5.67267	5.39243	5.3498	4	4	4	4	4	4	4	4	P20337	0.171698	0.0649432	0.133605	0.0524718	0.277335	0.272952	0.184578	0.0403102	0.147343	0.0345106
>Proteimics identification	99	C9JVK7	C9JVK7	ST6GAL1	Beta-galactoside alpha-2,6-sialyltransferase 1 (Fragment)	1886	5059;5060	C9JVK7;C9JH16;P15907-2;P15907	1	1	YES	26.9	26.9	6.334	52	13.045	0	1	1	>Quantification	C9JVK7	C9JVK7			360330	171560	188770	5.5567	5.23442	5.27593	1	1	1	1	1	1	1	1	C9JVK7	0.126892	0.0936698	0.117716	0.112457	0.206826	0.342439	0.126744	0.0889272	0.106968	0.117563
>Proteimics identification	41	A0A0C4DFP6	A0A0C4DFP6	CRTAC1	Cartilage acidic protein 1	790;1201;1862	2176;2177;3259;5019;5020	A0A0C4DFP6;Q9NQ79-3;Q9NQ79-2;Q9NQ79	3	3	NO	4.9	4.9	69.706	637	20.461	0	2	3	>Quantification	A0A0C4DFP6	A0A0C4DFP6			192020	93012	99013	5.28335	4.96854	4.99569	2	2	2	2	3	3	3	3	A0A0C4DFP6	0.19266	0.0729938	0.337612	0.116231	0.133162	0.147342	0.209904	0.0764673	0.311082	0.113229
>Proteimics identification	109	C9JXX4	C9JXX4	IGFBP5	Insulin-like growth factor-binding protein 5 (Fragment)	96;791;1347	2178;2179;232;233;234;235;3632	C9JXX4;P24593	3	3	NO	15.9	15.9	25.48	233	21.856	0	3	2	>Quantification	C9JXX4	C9JXX4			979390	611650	367740	5.99096	5.7865	5.56554	4	4	4	4	3	3	3	3	C9JXX4	0.18059	0.0635523	0.164309	0.0437225	0.279741	0.268084	0.141265	0.0712791	0.176152	0.043806
>Proteimics identification	394	P42702	P42702	LIFR	Leukemia inhibitory factor receptor	138;913	2497;2498;2499;334;335;336	P42702	2	2	NO	2.1	2.1	123.74	1097	14.237	0	2	2	>Quantification	P42702	P42702			29287	9233.5	20053	4.46667	3.96537	4.30218	3	3	3	3	3	3	3	3	P42702	0.113991	0.0244298	0.213414	0.0502975	0.218751	0.379117	0.167685	0.0430089	0.14353	0.0417805
>Proteimics identification	191	H7BZL4	H7BZL4	GPC1	Glypican-1 (Fragment)	366	1016;1017	H7BZL4;H7C410;P35052	1	1	YES	6	6	30.436	281	11.305	0	1	1	>Quantification	H7BZL4	H7BZL4			43690	21517	22172	4.64038	4.33278	4.3458	1	1	1	1	1	1	1	1	H7BZL4	0.0916821	0.0786837	0.127768	0.0632991	0.33528	0.303287	0.0757689	0.0784907	0.161932	0.0854061
>Proteimics identification	378	P31947	P31947	SFN	14-3-3 protein sigma	1283;1528;1752;1791	3492;3493;4150;4688;4767;4768	P31947	4	3	NO	21	17.7	27.774	248	44.89	0	2	2	>Quantification	P31947	P31947			138190	82329	55862	5.14048	4.91555	4.74712	3	2	2	2	3	2	2	2	P31947	0.155367	0.0764206	0.169232	0.0650008	0.257748	0.276232	0.205677	0.0490705	0.196044	0.0398082
>Proteimics identification	74	A6NNI4	A6NNI4	CD9	Tetraspanin	55;522;974	147;1470;1471;1472;148;149;150;151;152;2645;2646;2647;2648	A6NNI4;G8JLH6;P21926	3	3	NO	26.4	26.4	17.764	159	76.773	0	3	3	>Quantification	A6NNI4	A6NNI4			14208000	7976700	6231600	7.15253	6.90182	6.7946	7	7	6	4	6	6	5	4	A6NNI4	0.16473	0.0638635	0.134759	0.0503481	0.192295	0.394005	0.181874	0.0613238	0.144738	0.0382991
>Proteimics identification	239	P00338	P00338	LDHA	L-lactate dehydrogenase A chain	244;282;332;582;1325;1446;1769	1614;1615;3590;3931;4727;686;687;820;821;935	P00338;P00338-3	7	6	NO	24.4	20.8	36.688	332	49.946	0	3	6	>Quantification	P00338	P00338			187070	67452	119620	5.272	4.82899	5.0778	4	3	3	3	6	6	6	5	P00338	0.141096	0.0304798	0.117303	0.385765	0.170814	0.154542	0.291771	0.0519802	0.14094	0.151638
>Proteimics identification	312	P11279	P11279	LAMP1	Lysosome-associated membrane glycoprotein 1	43;91;564;1704;1854	114;115;1574;1575;224;225;4561;4562;5000	P11279	5	5	NO	12.2	12.2	44.882	417	49.781	0	5	4	>Quantification	P11279	P11279			524290	276130	248150	5.71957	5.44111	5.39471	5	5	5	5	4	4	4	4	P11279	0.173378	0.0499935	0.206568	0.0535156	0.23164	0.284905	0.146694	0.0611538	0.210746	0.059264
>Proteimics identification	344	P19652	P19652	ORM2	Alpha-1-acid glycoprotein 2	430;489;1660;1868	1185;1186;1352;1353;1354;1355;4448;5029;5030	P19652	4	3	NO	31.3	26.9	23.602	201	38.314	0	2	3	>Quantification	P19652	P19652			923320	461190	462130	5.96535	5.66388	5.66476	4	3	3	3	5	4	4	4	P19652	0.125557	0.0887897	0.187136	0.10358	0.182974	0.311963	0.137752	0.102376	0.242084	0.0907159
>Proteimics identification	490	Q92896	Q92896	GLG1	Golgi apparatus protein 1	16;26;62;1045;1617	162;163;2825;2826;2827;40;4367;4368;61;62	Q92896;Q92896-3;Q92896-2	5	5	NO	8.2	8.2	134.55	1179	61.15	0	4	5	>Quantification	Q92896	Q92896			71665	37925	33740	4.85531	4.57893	4.52815	5	5	5	5	5	5	4	4	Q92896	0.142452	0.0906578	0.20636	0.0704746	0.229966	0.26009	0.142904	0.0986741	0.17632	0.0907761
>Proteimics identification	476	Q8N4F0	Q8N4F0	BPIFB2	BPI fold-containing family B member 2	94;105	229;259;260;261	Q8N4F0	2	2	NO	8.5	8.5	49.172	458	39.537	0	2	1	>Quantification	Q8N4F0				63549	37959	25590	4.80311	4.57931	4.40807	2	2	2	2	2	2	1	1	Q8N4F0	0.759888	0.0311767	0.0461536	0.0183865	0.0461418	0.0982535	0.943912	0	0.05591	0
>Proteimics identification	235	O75976-2	O75976	CPD	Isoform 2 of Carboxypeptidase D	465	1281;1282;1283	O75976-2;O75976	1	1	YES	1.1	1.1	126.49	1133	7.1205	0	1	1	>Quantification	O75976-2	O75976-2			6117.6	2271.3	3846.3	3.78658	3.35627	3.58504	1	1	1	1	2	2	2	2	O75976-2	0.133289	0.0652767	0.0730642	0.0437518	0.344916	0.339703	0.137774	0.0603526	0.086412	0.0434189
>Proteimics identification	416	P54802	P54802	NAGLU	Alpha-N-acetylglucosaminidase	328;973;1057;1100;1122;1321;1900	2644;2855;2856;2942;2943;2984;2985;2986;3582;3583;5089;914;915	P54802	7	7	NO	12.5	12.5	82.265	743	70.868	0	6	6	>Quantification	P54802	P54802			81128	39923	41205	4.90917	4.60122	4.61495	7	7	5	4	6	6	4	4	P54802	0.150791	0.0757831	0.17873	0.0788345	0.151065	0.364797	0.212905	0.0710693	0.207969	0.0844188
>Proteimics identification	446	Q04609-6	Q04609	FOLH1	Isoform PSMA' of Glutamate carboxypeptidase 2	346;798;1522;1716;1895	2197;4138;4608;4609;5081;5082;964;965	Q04609-6;Q04609-9;Q04609-8;Q04609-7;Q04609	5	5	NO	11.5	11.5	77.999	693	63.633	0	4	4	>Quantification	Q04609-6	Q04609-6			83402	40594	42808	4.92118	4.60846	4.63152	4	4	4	4	4	4	4	4	Q04609-6	0.216209	0.0971564	0.117292	0.0636003	0.232511	0.273231	0.225788	0.0895976	0.131605	0.0673016
>Proteimics identification	247	P01023	P01023	A2M	Alpha-2-macroglobulin	80;1364	200;201;3685	P01023	2	2	NO	2.1	2.1	163.29	1474	17.424	0	2	1	>Quantification	P01023				7359	5973.5	1385.5	3.86682	3.77623	3.14161	2	2	2	2	1	1	1	1	P01023	0.597057	0.0385706	0.172205	0.0752952	0.0394639	0.0774077	0.36689	0.0532361	0.287928	0.0938014
>Proteimics identification	46	H0Y5I3	H0Y5I3	SLC44A4	Choline transporter-like protein 4 (Fragment)	245;1261	3448;3449;3450;3451;688	H0Y5I3;A0A0G2JIN1;Q53GD3	2	2	NO	6.3	6.3	45.626	411	40.074	0	2	1	>Quantification	H0Y5I3	H0Y5I3			1173000	624480	548540	6.0693	5.79552	5.73921	3	3	3	3	2	2	2	2	H0Y5I3	0.202436	0.0669889	0.117729	0.0702415	0.190927	0.351678	0.224313	0.0594951	0.0842591	0.05421
>Proteimics identification	156	F5H4C6	F5H4C6	GNS	N-acetylglucosamine-6-sulfatase (Fragment)	923;1877	2521;2522;5042	F5H4C6;H7C3P4;F6S8M0;P15586-2;P15586	2	2	NO	10.1	10.1	28.349	247	18.108	0	2	1	>Quantification	F5H4C6	F5H4C6			108930	69913	39020	5.03715	4.84456	4.59129	2	2	2	2	1	1	1	1	F5H4C6	0.196258	0.0951556	0.120061	0.0811374	0.274929	0.232459	0.188948	0.106427	0.144845	0.0974044
>Proteimics identification	285	P07602-3	P07602	PSAP	Isoform Sap-mu-9 of Prosaposin	198;314;315;434;439;663;673;765;815;1323;1327;1356;1469;1518;1599	1191;1192;1193;1194;1204;1803;1804;1847;1848;1849;1850;1851;1852;1853;1854;2085;2086;2087;2088;2226;2227;3586;3587;3593;3661;3662;3988;3989;3990;3991;4132;4333;587;588;887;888;889;890	P07602-3	15	15	NO	40	40	58.483	527	159.64	0	14	11	>Quantification	P07602-3	P07602-3			3871600	2180800	1690800	6.58789	6.33862	6.22809	20	20	19	17	18	18	17	11	P07602-3	0.158272	0.142492	0.177397	0.12449	0.179217	0.218269	0.165085	0.133979	0.190089	0.121732
>Proteimics identification	177	H0YLC2	H0YLC2	PSMA4	Proteasome subunit alpha type	1095;1932	2935;5159;5160;5161;5162	H0YLC2;H0YKT8;H0YMA1;H0YMZ1;H0YN18;H0YL69;P25789	2	2	NO	18.4	18.4	19.654	174	14.351	0	1	2	>Quantification	H0YLC2	H0YLC2			219800	108190	111610	5.34203	5.03419	5.0477	2	2	2	2	3	3	3	3	H0YLC2	0.0864851	0.0175786	0.112912	0.516383	0.170029	0.096612	0.302466	0.022446	0.183419	0.0138979
>Proteimics identification	272	P04792	P04792	HSPB1	Heat shock protein beta-1	1018;1050	2764;2765;2836	P04792	2	2	NO	13.2	13.2	22.782	205	40.371	0	2	1	>Quantification	P04792	P04792			194990	157650	37343	5.29001	5.19769	4.57221	2	2	2	2	1	1	1	1	P04792	0.202043	0.0836026	0.124407	0.0730836	0.29126	0.225603	0.206673	0.0795453	0.119904	0.0777262
>Proteimics identification	353	P22314-2	P22314	UBA1	Isoform 2 of Ubiquitin-like modifier-activating enzyme 1	14;246;960;1520;1907	2616;35;36;4135;4136;5103;5104;689	P22314-2;P22314	5	5	NO	8.1	8.1	113.8	1018	56.034	0	4	4	>Quantification	P22314-2	P22314-2			41185	10079	31106	4.61474	4.00342	4.49284	4	4	2	2	4	4	3	3	P22314-2	0.0892363	0.0286901	0.0752779	0.021834	0.652606	0.132356	0.195514	0.0761791	0.144943	0.0685812
>Proteimics identification	257	P02743	P02743	APCS	Serum amyloid P-component	813;1762	2222;2223;4706	P02743	2	2	NO	9.4	9.4	25.387	223	19.703	0	1	2	>Quantification	P02743	P02743			14377	0	14377	4.15767	#NUM!	4.15767	1	1	1	1	2	2	2	2	P02743	0.313942	0.0380842	0.379315	0.0509924	0.0646703	0.152997	0.29212	0.0479205	0.341743	0.0430307
>Proteimics identification	334	P16152	P16152	CBR1	Carbonyl reductase [NADPH] 1	358;531;702	1491;1939;989	P16152	3	3	NO	14.4	14.4	30.375	277	19.549	0	2	1	>Quantification	P16152	P16152			103640	65720	37924	5.01553	4.8177	4.57891	2	2	2	2	1	1	1	1	P16152	0.177927	0.0636812	0.164795	0.0638175	0.260153	0.269627	0.236287	0.0665881	0.183378	0.0653352
>Proteimics identification	118	E5RFU2	E5RFU2	EPHX2	Bifunctional epoxide hydrolase 2	126;727	2000;2001;307	E5RFU2;P34913	2	2	NO	5.5	5.5	58.855	523	13.576	0	1	2	>Quantification	E5RFU2	E5RFU2			35153	12451	22702	4.54596	4.0952	4.35606	1	1	1	1	2	2	2	2	E5RFU2	0.168521	0.0720635	0.109239	0.0861917	0.273727	0.290258	0.156606	0.0823263	0.150444	0.0843289
>Proteimics identification	184	H3BQZ9	H3BQZ9	APRT	Adenine phosphoribosyltransferase	1014;1480	2756;2757;2758;2759;4013	H3BQZ9;P07741	2	2	NO	17	17	16.616	153	48.096	0	1	2	>Quantification	H3BQZ9	H3BQZ9			167050	64384	102670	5.22285	4.80878	5.01144	2	2	2	2	3	3	3	3	H3BQZ9	0.140306	0.0396338	0.119686	0.053339	0.315013	0.332023	0.0794634	0.0386751	0.0825756	0.0397277
>Proteimics identification	371	P30044-2	P30044	PRDX5	Isoform Cytoplasmic+peroxisomal of Peroxiredoxin-5, mitochondrial	88;507;799	1416;1417;1418;1419;214;215;216;217;2198	P30044-2;P30044-3;P30044	3	3	NO	34.6	34.6	17.031	162	53.639	0	3	2	>Quantification	P30044-2	P30044-2			297650	168960	128690	5.47371	5.22778	5.10954	5	5	2	2	4	4	1	1	P30044-2	0.193582	0.0704647	0.141762	0.0593353	0.257985	0.27687	0.204094	0.0546886	0.153505	0.0418465
>Proteimics identification	412	P53396-3	P53396	ACLY	Isoform 3 of ATP-citrate synthase	309;440;1641	1205;1206;4409;880;881	P53396-3;P53396-2;P53396	3	3	NO	4.7	4.7	91.098	830	18.586	0	2	3	>Quantification	P53396-3	P53396-3			23930	10850	13080	4.37894	4.03543	4.11661	2	2	2	2	3	3	2	2	P53396-3	0.0898126	0.0415677	0.0734388	0.543974	0.115883	0.135324	0.0959808	0.0425708	0.282032	0.0488978
>Proteimics identification	441	Q5T0R7	Q5T0R7	CAP1	Adenylyl cyclase-associated protein 1 (Fragment)	45;1169	118;119;3169;3170;3171;3172	Q5T0R7;Q5T0R6;Q5T0R5;Q5T0R4;Q5T0R3;Q5T0R2;Q5T0R1;Q01518	2	2	NO	20.7	20.7	19.202	174	22.459	0	1	2	>Quantification	Q5T0R7	Q5T0R7			212040	95470	116570	5.32642	4.97987	5.06659	2	2	2	2	4	4	3	3	Q5T0R7	0.140495	0.0654379	0.143003	0.0802111	0.274504	0.296349	0.0559457	0.0290783	0.240595	0.0385489
>Proteimics identification	429	P62258-2	P62258	YWHAE	Isoform SV of 14-3-3 protein epsilon	3;1073;1283	2892;2893;2894;3;3492;3493;4;5;6	P62258-2;P62258	3	2	NO	16.7	13.3	26.504	233	15.334	0	2	2	>Quantification	P62258-2	P62258-2			263180	98106	165070	5.42025	4.9917	5.21767	4	3	2	2	5	4	3	3	P62258-2	0.145006	0.0536669	0.195065	0.0476974	0.303657	0.254907	0.168506	0.0455817	0.157361	0.0520835
>Proteimics identification	6	A0A087WV45	A0A087WV45	TTR	Transthyretin	2	2	A0A087WV45;A0A087WT59;P02766	1	1	YES	9.4	9.4	15.12	139	8.3459	0	1	0	>Quantification	A0A087WV45			A0A087WV45	47033	47033	0	4.6724	4.6724	#NUM!	1	1	1	1	0	0	0	0	A0A087WV45	0.153727	0.138091	0.136479	0.168118	0.258447	0.145138
>Proteimics identification	331	P15291-2	P15291	B4GALT1	Isoform Short of Beta-1,4-galactosyltransferase 1	510;575;1111;1395;1969	1425;1426;1601;1602;2960;2961;3780;5260;5261	P15291-2;P15291	5	5	NO	21.3	21.3	42.537	385	50.549	0	5	4	>Quantification	P15291-2	P15291-2			252260	155100	97160	5.40185	5.19061	4.98749	5	5	5	5	4	4	4	4	P15291-2	0.187767	0.0963198	0.341468	0.119633	0.131436	0.123376	0.115058	0.069927	0.365086	0.148943
>Proteimics identification	360	P25311	P25311	AZGP1	Zinc-alpha-2-glycoprotein	46;119;165;166;201;376;401;445;845;1352;1378;1406;1407;1553;1861;1950;1977	1065;1066;1067;1117;1118;1119;1120;1121;1122;120;1218;1219;1220;1221;1222;1223;1224;1225;1226;2328;2329;2330;2331;2332;2333;2334;2335;2336;2337;2338;2339;2340;287;288;289;290;291;292;293;294;3648;3649;3650;3651;3652;3744;3745;3746;3802;3803;3804;3805;3806;3807;3808;3809;3810;3811;3812;3813;4226;5016;5017;5018;504;505;506;507;508;509;5209;5210;5211;5212;5213;5278;5279;5280;5281;595;596;597	P25311	17	17	NO	53	53	34.258	298	197.54	0	17	15	>Quantification	P25311	P25311			137080000	86295000	50787000	8.13697	7.93599	7.70575	46	46	45	40	36	36	33	30	P25311	0.268844	0.0920694	0.108561	0.0860118	0.252642	0.19042	0.276599	0.0848462	0.11301	0.0788156
>Proteimics identification	269	P04279	P04279	SEMG1	Semenogelin-1	266;267;369;371;487;492;699;707;753;764;770;784;822;823;825;826;838;839;936;985;993;1069;1139;1215;1287;1360;1361;1369;1373;1435;1505;1543;1545;1550;1815	1021;1022;1044;1045;1046;1047;1048;1049;1050;1331;1332;1333;1334;1335;1336;1337;1338;1339;1340;1341;1342;1343;1344;1345;1346;1347;1348;1349;1362;1931;1932;1933;1934;1949;1950;2053;2081;2082;2083;2084;2105;2106;2107;2108;2109;2110;2111;2112;2161;2162;2163;2164;2165;2166;2167;2238;2239;2240;2241;2242;2243;2244;2245;2247;2248;2249;2250;2251;2252;2253;2254;2255;2256;2290;2291;2292;2293;2294;2295;2296…	P04279	35	31	NO	76.2	67.1	52.13	462	323.31	0	28	27	>Quantification	P04279	P04279			417730000	227720000	190010000	8.6209	8.3574	8.27878	137	119	114	93	135	113	110	93	P04279	0.134545	0.252071	0.132208	0.263663	0.0924134	0.0997433	0.13624	0.266277	0.172423	0.229651
>Proteimics identification	155	F5H442	F5H442	TSG101	Tumor susceptibility gene 101 protein	295;797;961	2195;2196;2617;847;848	F5H442;Q99816	3	3	NO	10.1	10.1	40.917	365	21.041	0	3	2	>Quantification	F5H442	F5H442			62265	34037	28227	4.79424	4.53195	4.45066	3	3	3	3	2	2	2	2	F5H442	0.217187	0.0552167	0.137715	0.0461359	0.210195	0.33355	0.213753	0.0408363	0.132632	0.0350903
>Proteimics identification	181	H3BMH2	H3BMH2	RAB11A	Ras-related protein Rab-11A (Fragment)	657;1844	1793;1794;4975	H3BMH2;H3BSC1;P62491-2;Q15907-2;P62491;Q15907	2	2	NO	15.5	15.5	17.668	155	12.34	0	2	1	>Quantification	H3BMH2	H3BMH2			47983	36262	11721	4.68109	4.55945	4.06896	2	2	2	2	1	1	1	1	H3BMH2	0.175359	0.0590833	0.167891	0.0599697	0.229434	0.308263	0.153418	0.0298097	0.11596	0.0470052
>Proteimics identification	502	Q99988	Q99988	GDF15	Growth/differentiation factor 15	124;1611	301;302;303;304;4353;4354;4355	Q99988	2	2	NO	10.4	10.4	34.14	308	51.896	0	2	2	>Quantification	Q99988	Q99988			1242000	622160	619840	6.09412	5.7939	5.79228	3	3	3	3	4	4	4	4	Q99988	0.125398	0.0537737	0.105032	0.0269066	0.106808	0.582081	0.375461	0.0614134	0.127485	0.0383243
>Proteimics identification	457	Q14507	Q14507	EDDM3A	Epididymal secretory protein E3-alpha	1252	3431;3432	Q14507	1	1	YES	7.5	7.5	17.646	147	7.6353	0	1	1	>Quantification	Q14507	Q14507			126960	71522	55433	5.10367	4.85444	4.74377	1	1	1	1	1	1	1	1	Q14507	0.156678	0.134276	0.358939	0.085864	0.156637	0.107607	0.14856	0.128505	0.340403	0.0930538
>Proteimics identification	315	P12110-3	P12110	COL6A2	Isoform 2C2A' of Collagen alpha-2(VI) chain	1048;1755	2833;4691;4692	P12110-3;P12110-2;P12110	2	2	NO	2.5	2.5	87.279	828	13.779	0	1	2	>Quantification	P12110-3	P12110-3			14510	5019.2	9491.2	4.16167	3.70063	3.97732	1	1	1	1	2	2	2	2	P12110-3	0.140593	0.0781388	0.161804	0.100986	0.239382	0.279097	0.139454	0.0919352	0.166772	0.102216
>Proteimics identification	124	E7ENV7	E7ENV7	CPNE8	Copine-8	279	815;816	E7ENV7;Q86YQ8-2;Q9HCH3-2;Q96FN4-2;O75131;Q96FN4;Q8IYJ1;Q96A23;O95741;Q9UBL6-2;Q86YQ8;Q96A23-2;Q9HCH3;O95741-2;Q9UBL6	1	1	YES	1.6	1.6	62.233	552	6.4548	0.0060606	1	1	>Quantification	E7ENV7	E7ENV7			15783	9003.4	6779.5	4.19819	3.95441	3.8312	1	1	1	1	1	1	1	1	E7ENV7	0.162779	0.0546068	0.121872	0.0725368	0.301228	0.286978	0.171237	0.0708081	0.117803	0.077399
>Proteimics identification	135	H7C0V9	H7C0V9	APP	Amyloid-beta A4 protein (Fragment)	207;1885	5058;609	H7C0V9;E9PG40;P05067-7;P05067-11;P05067-8;P05067-9;P05067	2	2	NO	5.2	5.2	54.981	485	11.711	0	2	0	>Quantification	H7C0V9			H7C0V9	32800	32800	0	4.51587	4.51587	#NUM!	2	2	1	1	0	0	0	0	H7C0V9	0.15783	0.126276	0.160352	0.13889	0.227619	0.189032
>Proteimics identification	303	P0DOY3	P0DOY3	IGLC3	Immunoglobulin lambda constant 3	8;135;1890	23;24;25;329;5070;5071;5072;5073	P0DOY3;P0DOY2	3	1	YES	50.9	17.9	11.265	106	51.797	0	1	1	>Quantification	P0DOY3	P0DOY3			312610	155600	157020	5.495	5.19201	5.19595	5	2	2	2	3	1	1	1	P0DOY3	0.180112	0.0775718	0.123517	0.104356	0.274529	0.239914	0.205919	0.0887509	0.0824467	0.138601
>Proteimics identification	430	P63267	P63267	ACTG2	Actin, gamma-enteric smooth muscle	141;142;305;348;449;837;1584;1942	1234;1235;2288;2289;363;364;365;4295;4296;4297;4298;5185;5186;5187;871;968;969	P63267;P68133;P68032;P62736	8	1	YES	22.3	4.3	41.876	376	11.065	0	1	1	>Quantification	P63267	P63267			122890	51587	71305	5.08952	4.71254	4.85312	9	1	1	1	8	2	2	2	P63267	0.186646	0.133949	0.302273	0.117408	0.197913	0.0618097	0.223092	0.126343	0.260475	0.124102
>Proteimics identification	152	F5H1F6	F5H1F6	VPS37B	Vacuolar protein sorting-associated protein 37B (Fragment)	593;1402;1944	1641;1642;3794;3795;5190	F5H1F6;F5H4M0;Q9H9H4	3	3	NO	28.3	28.3	20.654	184	29.084	0	2	3	>Quantification	F5H1F6				87709	35957	51752	4.94304	4.55578	4.71393	2	2	2	2	3	3	3	3	F5H1F6	0.228197	0.0150442	0.101481	0.0330589	0.178957	0.443263	0.252198	0.00816921	0.0853682	0
>Proteimics identification	276	P05386	P05386	RPLP1	60S acidic ribosomal protein P1	6	19;20	P05386	1	1	YES	14	14	11.514	114	7.6358	0	1	1	>Quantification	P05386				152800	75341	77461	5.18412	4.87703	4.88908	1	1	1	1	1	1	1	1	P05386	0.268648	0.0977171	0.296465	0.136677	0.200492	0	0.349551	0.166124	0.296168	0.187461
>Proteimics identification	266	P04004	P04004	VTN	Vitronectin	374;1489	1060;1061;1062;4060;4061;4062	P04004	2	2	NO	6.3	6.3	54.305	478	17.098	0	2	2	>Quantification	P04004				90182	55962	34220	4.95512	4.74789	4.53428	4	4	4	4	2	2	2	2	P04004	0.14203	0.0949387	0.398181	0.108849	0.171468	0.0845334	0	0.142252	0.238023	0.0752405
>Proteimics identification	514	Q9HCC9-5	Q9HCC9	ZFYVE28	Isoform 5 of Lateral signaling target protein 2 homolog	1236	3359;3360	Q9HCC9-5	1	1	YES	1.9	1.9	83.197	773	-2	1	1	1	>Quantification	Q9HCC9-5				67024	31771	35254	4.82623	4.50203	4.54721	1	1	1	1	1	1	1	1	Q9HCC9-5	0.182202	0.139826	0.349242	0.106648	0.222083	0	0.169517	0.14237	0.259486	0.147495
>Proteimics identification	408	P51149	P51149	RAB7A	Ras-related protein Rab-7a	324;388	1096;904	P51149	2	2	NO	13	13	23.489	207	13.457	0	2	0	>Quantification	P51149			P51149	35594	35594	0	4.55138	4.55138	#NUM!	2	2	2	2	0	0	0	0	P51149	0.189396	0.0699045	0.151863	0.0878532	0.332217	0.168766
>Proteimics identification	215	O00299	O00299	CLIC1	Chloride intracellular channel protein 1	409;688;1003;1067;1310	1135;1136;1892;1893;2725;2877;2878;2879;3548	O00299	5	5	NO	29	29	26.922	241	36.773	0	4	4	>Quantification	O00299	O00299			351810	199130	152670	5.54631	5.29914	5.18375	5	5	5	4	4	4	4	4	O00299	0.185454	0.0972219	0.159824	0.0722412	0.242118	0.243141	0.16906	0.0854123	0.158774	0.0802611
>Proteimics identification	77	B4DFW2	B4DFW2	TIMP2	Metalloproteinase inhibitor 2	264;533;649;1355	1495;1778;3659;3660;726;727;728;729	B4DFW2;P16035	4	4	NO	31.5	31.5	16.081	143	28.324	0	2	4	>Quantification	B4DFW2	B4DFW2			704570	161560	543010	5.84792	5.20833	5.73481	3	3	3	3	5	5	4	4	B4DFW2	0.0934525	0.103202	0.168825	0.339252	0.151537	0.143731	0.302932	0.135944	0.173465	0.105786
>Proteimics identification	506	Q9BY14	Q9BY14	TEX101	Testis-expressed protein 101	653	1784;1785	Q9BY14;Q9BY14-2	1	1	YES	4.8	4.8	26.667	249	17.193	0	1	1	>Quantification	Q9BY14	Q9BY14			48343	25708	22635	4.68433	4.41007	4.35478	1	1	1	1	1	1	1	1	Q9BY14	0.186846	0.0839392	0.41631	0.105962	0.064313	0.14263	0.178198	0.0885709	0.429377	0.111714
>Proteimics identification	38	K7EQ48	K7EQ48	GPI	Glucose-6-phosphate isomerase	529;901	1487;1488;2472;2473;2474;2475;2476;2477;2478	K7EQ48;A0A0A0MTS2;P06744;P06744-2	2	2	NO	4.9	4.9	53.401	474	20.621	0	2	2	>Quantification	K7EQ48	K7EQ48			43108	22460	20648	4.63456	4.35141	4.31488	4	4	2	2	5	5	1	1	K7EQ48	0.104471	0.0252629	0.642067	0.030106	0.097702	0.100391	0.196104	0.0617604	0.277453	0.0655537
>Proteimics identification	44	A0A0C4DGH5	A0A0C4DGH5	CAND1	Cullin-associated NEDD8-dissociated protein 1 (Fragment)	30;933;1183	2541;2542;3218;69	A0A0C4DGH5;Q86VP6-2;Q86VP6	3	3	NO	4.9	4.9	85.408	770	17.692	0	2	2	>Quantification	A0A0C4DGH5	A0A0C4DGH5			6800.7	3437	3363.8	3.83255	3.53618	3.52683	2	2	2	2	2	2	2	2	A0A0C4DGH5	0.211209	0.0685986	0.315685	0.0473778	0.204926	0.152204	0.21967	0.0880004	0.378648	0.0469542
>Proteimics identification	259	P02751-17	P02751	FN1	Isoform 17 of Fibronectin	187;188;228;243;288;303;339;353;414;443;498;505;532;573;592;630;675;676;682;683;712;741;844;849;854;946;962;1093;1288;1307;1312;1348;1419;1420;1440;1555;1588;1633;1636;1673;1677;1694;1712;1714;1743;1753;1754;1807;1823;1826;1833;1851;1859;1875;1905;1943;1947	1144;1145;1146;1147;1213;1214;1215;1216;1374;1414;1492;1493;1494;1598;1599;1635;1636;1637;1638;1639;1640;1738;1739;1740;1741;1857;1858;1859;1860;1861;1862;1863;1878;1879;1880;1881;1959;1960;1961;1962;2025;2026;2027;2028;2327;2348;2349;2350;2361;2362;2586;2587;2618;2619;2620;2621;2928;2929;2930;2931;2932;3500;3501;3502;3503;3539;3540;3541;3542;3550;3551;3552;3553;3554;3633;3853;3854;3855;3856;3857…	P02751-17;P02751-3;P02751	57	57	NO	38.9	38.9	256.5	2330	323.31	0	54	48	>Quantification	P02751-17	P02751-17			10082000	5416200	4666000	7.00355	6.73369	6.66894	90	90	81	69	81	81	75	60	P02751-17	0.102192	0.127077	0.279643	0.111861	0.230736	0.129318	0.1152	0.126392	0.249966	0.128063
>Proteimics identification	3	A0A087X0Q4	A0A087X0Q4	IGKV2-40	Immunoglobulin kappa variable 2-40	619	1713	A0A087X0Q4;A2NJV5;A0A0A0MRZ7;A0A075B6S6;A0A075B6S2;A0A075B6P5;A0A087WW87;P06310;P01615;P01614	1	1	YES	12.5	12.5	11.434	104	6.5384	0.0041152	1	0	>Quantification	A0A087X0Q4			A0A087X0Q4	82212	82212	0	4.91494	4.91494	#NUM!	1	1	1	1	0	0	0	0	A0A087X0Q4	0.216226	0.0539765	0.112651	0.121999	0.258146	0.237003
>Proteimics identification	30	A0A0A0MSN4	A0A0A0MSN4	ACE	Angiotensin-converting enzyme	57;313;480;850;851;999;1441;1600;1655;1756;1940;1963	1316;1317;155;156;2351;2352;2353;2354;2355;2356;2357;2358;2716;2717;3920;3921;4334;4335;4437;4438;4693;5179;5180;5245;5246;885;886	A0A0A0MSN4;P12821-2;P12821	12	12	NO	12.2	12.2	142.42	1242	165.07	0	12	10	>Quantification	A0A0A0MSN4	A0A0A0MSN4			359740	197970	161770	5.55599	5.2966	5.2089	14	14	13	10	13	13	13	10	A0A0A0MSN4	0.219396	0.0610515	0.18401	0.0580359	0.263236	0.21427	0.261322	0.0575818	0.177675	0.0488598
>Proteimics identification	175	H0YBJ4	H0YBJ4	MATN2	Matrilin-2 (Fragment)	49;222;1366;1513	127;128;3687;3688;4124;644;645	H0YBJ4;O00339-4;O00339-3;O00339-2;O00339	4	4	NO	8.1	8.1	80.457	720	28.586	0	3	4	>Quantification	H0YBJ4	H0YBJ4			96359	40370	55989	4.98389	4.60606	4.7481	3	3	3	3	4	4	4	4	H0YBJ4	0.148642	0.0959125	0.316808	0.128359	0.190193	0.120085	0.160246	0.109516	0.245696	0.129812
>Proteimics identification	362	P26641	P26641	EEF1G	Elongation factor 1-gamma	900;1867	2468;2469;2470;2471;5028	P26641;P26641-2	2	2	NO	5	5	50.118	437	15.469	0	1	2	>Quantification	P26641	P26641			30389	11516	18873	4.48272	4.0613	4.27584	2	2	2	2	3	3	3	3	P26641	0.306543	0.029453	0.383203	0.0101486	0.0642417	0.20641	0.197529	0.0202161	0.378513	0.00307735
>Proteimics identification	221	O00757	O00757	FBP2	Fructose-1,6-bisphosphatase isozyme 2	964	2623;2624	O00757	1	1	YES	2.9	2.9	36.743	339	6.5411	0.0041237	1	1	>Quantification	O00757	O00757			59274	31906	27368	4.77286	4.50387	4.43724	1	1	1	1	1	1	1	1	O00757	0.165093	0.0590197	0.145322	0.098711	0.204073	0.327781	0.177268	0.0645024	0.142242	0.110559
>Proteimics identification	308	P10909-4	P10909	CLU	Isoform 4 of Clusterin	127;442;446;452;485;603;859;994;1052;1424;1658;1659;1832	1208;1209;1210;1211;1212;1227;1228;1239;1240;1241;1242;1327;1328;1329;1665;1666;1667;2383;2707;2708;2709;2838;2839;2840;2841;2842;2843;2844;2845;308;309;310;311;312;313;314;315;3862;3863;3864;3865;4441;4442;4443;4444;4445;4446;4447;4944;4945	P10909-4;P10909;P10909-5;P10909-2	13	13	NO	32.5	32.5	48.803	416	195.51	0	13	12	>Quantification	P10909-4	P10909-4			38473000	15964000	22509000	7.58516	7.20314	7.35236	26	26	26	21	24	24	24	20	P10909-4	0.112458	0.115972	0.301882	0.171387	0.161295	0.132069	0.138156	0.130764	0.285976	0.148118
>Proteimics identification	211	M0R1L2	M0R1L2	PGLS	6-phosphogluconolactonase (Fragment)	1028;1137	2787;2788;3026	M0R1L2;O95336	2	2	NO	25.2	25.2	16.364	147	12.813	0	2	1	>Quantification	M0R1L2	M0R1L2			71413	51093	20320	4.85378	4.70836	4.30792	2	2	1	1	1	1	1	1	M0R1L2	0.169024	0.0989601	0.128265	0.0905882	0.257292	0.255871	0.171576	0.0881614	0.14884	0.0859103
>Proteimics identification	219	O00754-2	O00754	MAN2B1	Isoform 2 of Lysosomal alpha-mannosidase	474	1304;1305	O00754-2;O00754	1	1	YES	1.5	1.5	113.61	1010	7.7958	0	1	1	>Quantification	O00754-2	O00754-2			2903	817.43	2085.6	3.46285	2.91245	3.31923	1	1	1	1	1	1	1	1	O00754-2	0.122138	0.0830415	0.151871	0.0572911	0.304394	0.281264	0.119141	0.148975	0.181159	0.121459
>Proteimics identification	267	P04066	P04066	FUCA1	Tissue alpha-L-fucosidase	308;318;562;940;1336;1958	1570;2572;2573;3606;3607;5227;878;879;893;894	P04066	6	6	NO	17	17	53.688	466	53.061	0	5	5	>Quantification	P04066	P04066			318650	117500	201150	5.50331	5.07004	5.30352	5	5	5	5	5	5	5	3	P04066	0.172286	0.104829	0.262878	0.077927	0.161628	0.220451	0.175987	0.111868	0.245128	0.074037
>Proteimics identification	325	P14384	P14384	CPM	Carboxypeptidase M	125;270;481;758;1140;1291;1410;1519	1318;1319;2069;2070;3034;3035;305;306;3507;3817;3818;4133;4134;802	P14384	8	8	NO	24.8	24.8	50.513	443	93.01	0	6	8	>Quantification	P14384	P14384			1073400	502090	571270	6.03076	5.70078	5.75684	6	6	6	5	8	8	7	6	P14384	0.182516	0.180195	0.096573	0.100236	0.262135	0.178346	0.183383	0.202933	0.0901329	0.101972
>Proteimics identification	223	O14773	O14773	TPP1	Tripeptidyl-peptidase 1	167;1341;1871;1936	3618;3619;5033;510;5169	O14773	4	4	NO	8.7	8.7	61.247	563	34.07	0	2	3	>Quantification	O14773	O14773			133520	44201	89321	5.12555	4.64543	4.95095	2	2	2	2	3	3	3	3	O14773	0.166732	0.132559	0.233019	0.155347	0.172059	0.140284	0.116571	0.0909574	0.129894	0.112667
>Proteimics identification	50	A0A140TA49	A0A140TA49	C4A	Complement C4-A	1;32;76;343;768;830;1477;1821	1;191;192;2094;2095;2265;2266;4006;4007;4914;72;73;958	A0A140TA49;A0A140TA44;A0A140TA32;A0A0G2JPR0;P0C0L4-2;P0C0L4	8	8	NO	7.3	7.3	187.79	1698	84.687	0	6	7	>Quantification	A0A140TA49	A0A140TA49			56570	26314	30256	4.75259	4.42019	4.48081	6	6	6	5	7	7	6	5	A0A140TA49	0.202655	0.0125334	0.187607	0.10788	0.23768	0.251645	0.202164	0.0313674	0.113909	0.262612
>Proteimics identification	357	P22748	P22748	CA4	Carbonic anhydrase 4	123;560	1566;1567;300	P22748	2	2	NO	7.4	7.4	35.032	312	11.177	0	2	1	>Quantification	P22748	P22748			99237	62174	37063	4.99667	4.79361	4.56894	2	2	2	2	1	1	1	1	P22748	0.186495	0.129497	0.23984	0.0864137	0.201941	0.155814	0.193425	0.0797257	0.301669	0.0744938
>Proteimics identification	159	F5H6G8	F5H6G8	MANSC1	MANSC domain-containing protein 1 (Fragment)	1512	4122;4123	F5H6G8;Q9H8J5	1	1	YES	26.3	26.3	6.2572	57	6.3575	0.0059524	1	1	>Quantification	F5H6G8				129420	61093	68331	5.112	4.78599	4.83462	1	1	1	1	1	1	1	1	F5H6G8	0.132558	0.0644155	0.112544	0.0533807	0.206946	0.430156	0.187135	0.0957808	0	0.0784618
>Proteimics identification	128	H0Y3Y6	H0Y3Y6	PPP1CB	Serine/threonine-protein phosphatase PP1-beta catalytic subunit (Fragment)	1627	4385;4386	H0Y3Y6;E7ETD8;F8VR82;F8VYE8;F8W0W8;P62136-3;P36873;P62140;P62136;P36873-2;P62136-2	1	1	YES	22	22	9.7506	82	16.214	0	1	1	>Quantification	H0Y3Y6	H0Y3Y6			55736	29128	26608	4.74614	4.46431	4.42501	1	1	1	1	1	1	1	1	H0Y3Y6	0.149783	0.0813838	0.141769	0.0673826	0.293278	0.266403	0.189854	0.103736	0.117777	0.141039
>Proteimics identification	382	P34059	P34059	GALNS	N-acetylgalactosamine-6-sulfatase	48;1972	123;124;125;126;5266;5267;5268	P34059	2	2	NO	4.8	4.8	58.025	522	13.216	0	2	2	>Quantification	P34059	P34059			66382	34433	31948	4.82205	4.53697	4.50444	4	4	3	3	3	3	3	3	P34059	0.183068	0.069205	0.171537	0.0613673	0.28321	0.231613	0.136125	0.0561142	0.377463	0.0529542
>Proteimics identification	222	O14494	O14494	PLPP1	Phospholipid phosphatase 1	53;795;1164;1296	141;142;143;144;145;2190;2191;3160;3519;3520	O14494	4	4	NO	19	19	32.156	284	59.441	0	4	3	>Quantification	O14494	O14494			627910	336340	291570	5.7979	5.52678	5.46474	5	5	4	4	5	5	4	4	O14494	0.238172	0.0475279	0.149756	0.0485151	0.189932	0.326096	0.220152	0.055491	0.144501	0.0511253
>Proteimics identification	169	G3V357	G3V357	RNASE1	Ribonuclease pancreatic	199;821	2236;2237;589	G3V357;P07998	2	2	NO	40.5	40.5	13.049	116	25.419	0	1	2	>Quantification	G3V357				3261900	1019400	2242400	6.51347	6.00834	6.35071	1	1	1	1	2	2	2	2	G3V357	0	0.267774	0.513036	0.218327	0	0.000863016	0.065844	0.116069	0.472709	0.0404535
>Proteimics identification	237	O95274	O95274	LYPD3	Ly6/PLAUR domain-containing protein 3	715	1967;1968	O95274	1	1	YES	5.8	5.8	35.97	346	23	0	1	1	>Quantification	O95274				29646	16627	13019	4.47197	4.22081	4.11458	1	1	1	1	1	1	1	1	O95274	4e-06	0	0.256541	0.0832476	0.191149	0.469058	0.123938	0.0590164	0.200723	0.0522012
>Proteimics identification	209	K7ESQ5	K7ESQ5	ZNF461	Zinc finger protein 461 (Fragment)	1244	3417;3418	K7ESQ5	1	1	YES	12	12	17.16	142	-2	1	1	1	>Quantification	K7ESQ5	K7ESQ5			69593	35468	34125	4.84257	4.54984	4.53307	1	1	1	1	1	1	1	1	K7ESQ5	0.1748	0.113181	0.138406	0.112358	0.225425	0.23583	0.150602	0.164042	0.10205	0.127504
>Proteimics identification	417	P55072	P55072	VCP	Transitional endoplasmic reticulum ATPase	359;957;1036;1043;1085;1250;1343	2612;2811;2821;2914;3426;3427;3428;3621;3622;990;991	P55072	7	7	NO	12.2	12.2	89.321	806	42.63	0	6	4	>Quantification	P55072	P55072			64862	32561	32301	4.81199	4.5127	4.50922	6	6	5	5	5	5	4	4	P55072	0.160938	0.104921	0.144443	0.0503101	0.23929	0.300097	0.223362	0.103105	0.188209	0.0892895
>Proteimics identification	123	E9PLD0	E9PLD0	RAB1B	Ras-related protein Rab-1B	415;1108	1148;2953;2954	E9PLD0;E7END7;P62820-2;Q9H0U4;Q92928;P62820	2	1	YES	16	9.5	18.483	169	25.151	0	1	0	>Quantification	E9PLD0			E9PLD0	19217	19217	0	4.28369	4.28369	#NUM!	2	1	1	1	1	0	0	0	E9PLD0	0.153037	0.0521107	0.147701	0.0574915	0.325592	0.264068
>Proteimics identification	399	P48637	P48637	GSS	Glutathione synthetase	50;713;1847	129;1963;1964;4980;4981	P48637	3	3	NO	7	7	52.384	474	21.023	0	2	3	>Quantification	P48637	P48637			54767	23492	31274	4.73852	4.37092	4.49518	2	2	1	1	3	3	2	2	P48637	0.175723	0.0574617	0.141112	0.0800058	0.243006	0.302691	0.187146	0.0623789	0.143662	0.0759752
>Proteimics identification	107	C9JR52	C9JR52	PTN	Pleiotrophin	991;1946	2691;2692;5195;5196	C9JR52;P21246	2	2	NO	24.1	24.1	18.877	166	17.451	0	2	2	>Quantification	C9JR52	C9JR52			146930	76296	70632	5.16711	4.8825	4.849	2	2	2	2	2	2	2	2	C9JR52	0.196812	0.0580327	0.16041	0.0824	0.332866	0.16948	0.20031	0.0669454	0.114893	0.0766152
>Proteimics identification	130	E7EV01	E7EV01	CAPN5	Calpain-5	350;1779	4741;973;974	E7EV01;O15484	2	2	NO	4.7	4.7	77.469	680	23.435	0	2	1	>Quantification	E7EV01	E7EV01			6846.3	5511.4	1335	3.83546	3.74126	3.12548	2	2	2	2	1	1	1	1	E7EV01	0.231593	0.0581815	0.134339	0.083712	0.209153	0.283021	0.26909	0.0407053	0.102993	0.0673423
>Proteimics identification	117	D6RJ96	D6RJ96	HSPA4L	Heat shock 70 kDa protein 4L (Fragment)	661;1142	1800;3039;3040	D6RJ96;E9PDE8;O95757	2	2	NO	4	4	59.196	531	10.964	0	1	2	>Quantification	D6RJ96	D6RJ96			4918.3	280.29	4638	3.69182	2.44761	3.66633	1	1	1	1	2	2	2	2	D6RJ96	0.179771	0.0282097	0.0738253	0.00806089	0.280837	0.429296	0.181184	0.068042	0.121094	0.04574
>Proteimics identification	58	A0A1B0GTP7	A0A1B0GTP7	ASAH1	Acid ceramidase	239;499;658;835;1136;1187;1568;1689;1888	1375;1376;1377;1795;1796;2277;2278;3011;3012;3013;3014;3015;3016;3017;3018;3019;3020;3021;3022;3023;3024;3025;3222;3223;3224;3225;4258;4524;4525;4526;5065;5066;677	A0A1B0GTP7;E7EMM4;A0A1B0GW68;A0A1B0GUA4;A0A1B0GTM3;A0A1B0GTZ5;A0A1B0GUH5;Q13510;Q13510-2	9	9	NO	40.6	40.6	32.573	288	87.135	0	9	7	>Quantification	A0A1B0GTP7	A0A1B0GTP7			1620100	806560	813570	6.20954	5.90664	5.91039	17	17	15	13	16	16	15	12	A0A1B0GTP7	0.144267	0.138029	0.193963	0.165975	0.170611	0.17913	0.176845	0.156863	0.1687	0.178592
>Proteimics identification	230	O60701-2	O60701	UGDH	Isoform 2 of UDP-glucose 6-dehydrogenase	364;911	1012;1013;2495	O60701-2;O60701	2	2	NO	8.4	8.4	47.602	427	14.357	0	2	1	>Quantification	O60701-2			O60701-2	12189	9050.5	3139	4.08597	3.95667	3.49679	2	2	1	1	1	1	0	0	O60701-2	0.204158	0.0716559	0.102321	0.103514	0.319284	0.199069
>Proteimics identification	364	P27487	P27487	DPP4	Dipeptidyl peptidase 4	218;640;820;995;1001;1021;1064;1719;1822;1864	1760;1761;2235;2710;2719;2720;2773;2774;2775;2776;2868;2869;4613;4915;4916;5023;5024;634;635	P27487	10	10	NO	14	14	88.278	766	70.003	0	8	9	>Quantification	P27487	P27487			350300	190490	159800	5.54444	5.27987	5.20358	9	9	9	8	10	10	10	8	P27487	0.196054	0.076326	0.189555	0.0570272	0.203482	0.277556	0.193518	0.0901887	0.183053	0.0619764
>Proteimics identification	509	Q9H173	Q9H173	SIL1	Nucleotide exchange factor SIL1	416;530;1778;1789;1816;1850	1149;1150;1489;1490;4740;4762;4763;4764;4900;4901;4987;4988;4989;4990	Q9H173	6	6	NO	15.8	15.8	52.084	461	47.748	0	5	6	>Quantification	Q9H173	Q9H173			401260	209430	191830	5.60343	5.32104	5.28292	7	7	6	5	7	7	6	5	Q9H173	0.13485	0.124976	0.300181	0.107364	0.164067	0.168561	0.135497	0.122696	0.312416	0.11214
>Proteimics identification	410	P52788-2	P52788	SMS	Isoform 2 of Spermine synthase	666;1193	1808;3238	P52788-2;P52788	2	2	NO	11.8	11.8	35.278	313	23.402	0	1	1	>Quantification	P52788-2	P52788-2			11952	3991.6	7960.9	4.07744	3.60115	3.90096	1	1	1	1	1	1	1	1	P52788-2	0.150286	0.095016	0.152025	0.0854319	0.289581	0.22766	0.170223	0.0781744	0.148763	0.0911733
>Proteimics identification	425	P61026	P61026	RAB10	Ras-related protein Rab-10	39;1108	105;106;2953;2954	P61026	2	1	YES	11	5.5	22.541	200	9.1114	0	1	1	>Quantification	P61026	P61026			78656	40216	38441	4.89573	4.6044	4.58479	2	1	1	1	2	1	1	1	P61026	0.16854	0.0563203	0.143938	0.0639366	0.276441	0.290824	0.17513	0.0602964	0.139895	0.0634832
>Proteimics identification	182	H3BUD9	H3BUD9	RAB27A	Ras-related protein Rab-27A (Fragment)	591;882;1691	1632;1633;1634;2430;2431;4528;4529	H3BUD9;H3BS49;H3BVH7;H3BN55;P51159-2;P51159	3	3	NO	36.8	36.8	10.688	95	27.129	0	3	3	>Quantification	H3BUD9	H3BUD9			1161200	557160	604020	6.06491	5.74598	5.78105	3	3	3	3	4	4	4	4	H3BUD9	0.207894	0.0721424	0.161047	0.0586138	0.241287	0.259016	0.210039	0.0710468	0.149844	0.0542792
>Proteimics identification	324	P13861-2	P13861	PRKAR2A	Isoform 2 of cAMP-dependent protein kinase type II-alpha regulatory subunit	762;788;1278;1396	2078;2174;3479;3480;3781;3782;3783	P13861-2;P13861	4	4	NO	14.9	14.9	43.066	382	35.006	0	3	3	>Quantification	P13861-2	P13861-2			61186	28084	33101	4.78665	4.44846	4.51984	3	3	2	2	4	4	2	2	P13861-2	0.210115	0.0524386	0.148635	0.0540133	0.202866	0.331932	0.225558	0.071098	0.0907143	0.0486345
>Proteimics identification	438	P98095	P98095	FBLN2	Fibulin-2	97	236;237	P98095;P98095-2	1	1	YES	0.9	0.9	126.57	1184	11.938	0	1	1	>Quantification	P98095	P98095			23895	14581	9314.3	4.37831	4.16379	3.96915	1	1	1	1	1	1	1	1	P98095	0.129026	0.0146923	0.16165	0.0710217	0.447056	0.176554	0.126385	0.0215452	0.159769	0.0726015
>Proteimics identification	507	Q9BZQ8	Q9BZQ8	FAM129A	Protein Niban	421	1163;1164;1165;1166	Q9BZQ8	1	1	YES	1.3	1.3	103.13	928	7.3416	0	1	1	>Quantification	Q9BZQ8	Q9BZQ8			31570	15629	15941	4.49927	4.19393	4.20252	2	2	2	2	2	2	1	1	Q9BZQ8	0.0803564	0.0179003	0.053179	0.0177858	0.121063	0.709716	0.151799	0.0486039	0.0943591	0.0373691
>Proteimics identification	503	Q9BTY2	Q9BTY2	FUCA2	Plasma alpha-L-fucosidase	387;565;1214;1901	1094;1095;1576;1577;3298;5090;5091;5092;5093	Q9BTY2	4	4	NO	10.9	10.9	54.066	467	27.175	0	4	3	>Quantification	Q9BTY2	Q9BTY2			107180	62683	44499	5.03011	4.79715	4.64835	5	5	5	5	4	4	4	4	Q9BTY2	0.179267	0.0806822	0.290817	0.0742255	0.200771	0.174238	0.170348	0.0981873	0.26386	0.0817108
>Proteimics identification	347	P20142	P20142	PGC	Gastricsin	726;1590	1996;1997;1998;1999;4308;4309;4310;4311	P20142	2	2	NO	5.2	5.2	42.425	388	24.368	0	2	2	>Quantification	P20142	P20142			38367000	21188000	17179000	7.58396	7.32609	7.235	4	4	4	4	4	4	4	4	P20142	0.16134	0.151919	0.236657	0.154815	0.0898024	0.205466	0.164152	0.163611	0.23083	0.164942
>Proteimics identification	314	P11766	P11766	ADH5	Alcohol dehydrogenase class-3	1732;1737	4645;4646;4656	P11766	2	2	NO	9.6	9.6	39.724	374	21.459	0	2	1	>Quantification	P11766	P11766			62534	37235	25298	4.79612	4.57095	4.40309	2	2	2	2	1	1	1	1	P11766	0.160031	0.0546535	0.20574	0.0590538	0.240931	0.27959	0.206505	0.0650039	0.156003	0.067023
>Proteimics identification	185	H3BTI0	H3BTI0	CRISPLD2	Cysteine-rich secretory protein LCCL domain-containing 2	381;743	1082;2033;2034	H3BTI0;Q9H0B8-3;Q9H0B8-2;Q9H0B8	2	1	YES	5.4	3.4	55.79	496	14.899	0	1	0	>Quantification	H3BTI0			H3BTI0	18833	18833	0	4.27492	4.27492	#NUM!	1	1	1	1	2	0	0	0	H3BTI0	0.181583	0.0617733	0.138153	0.0997254	0.326115	0.192651
>Proteimics identification	488	Q92820	Q92820	GGH	Gamma-glutamyl hydrolase	1595	4320;4321;4322;4323	Q92820	1	1	YES	4.4	4.4	35.964	318	13.248	0	1	1	>Quantification	Q92820	Q92820			32891	17281	15611	4.51708	4.23757	4.19343	2	2	2	2	2	2	2	2	Q92820	0.125677	0.0373537	0.630203	0.0310869	0.0894237	0.0862563	0.121217	0.532508	0.143398	0.0286301
>Proteimics identification	14	A0A087WY82	A0A087WY82	F11R	Junctional adhesion molecule A	1825	4922;4923;4924;4925	A0A087WY82;Q9Y624	1	1	YES	3.9	3.9	30.197	279	7.1634	0	1	1	>Quantification	A0A087WY82	A0A087WY82			96823	54442	42381	4.98598	4.73593	4.62717	2	2	2	2	2	2	2	2	A0A087WY82	0.194195	0.0522922	0.0704003	0.0511276	0.20025	0.431735	0.227855	0.0516022	0.100662	0.0546443
>Proteimics identification	470	Q6PCB0	Q6PCB0	VWA1	von Willebrand factor A domain-containing protein 1	294;423;488;738;827;1020	1169;1170;1171;1350;1351;2020;2021;2257;2258;2259;2260;2261;2769;2770;2771;2772;845;846	Q6PCB0	6	6	NO	24.5	24.5	46.804	445	70.767	0	6	6	>Quantification	Q6PCB0	Q6PCB0			472560	277950	194610	5.67446	5.44397	5.28917	9	9	7	6	9	9	6	6	Q6PCB0	0.120309	0.142936	0.268955	0.107508	0.173907	0.186384	0.136046	0.13427	0.271631	0.110823
>Proteimics identification	56	A0A140TA72	A0A140TA72	CES5A	Carboxylic ester hydrolase	466;1141;1837	1284;1285;3036;3037;3038;4956;4957;4958;4959	A0A140TA72;A0A140TA78;A0A140TA61;A0A140TA75;Q6NT32-3;Q6NT32-2;Q6NT32;Q6NT32-4	3	1	YES	8.3	2.8	52.338	469	7.0715	0	1	1	>Quantification	A0A140TA72		A0A140TA72	A0A140TA72	24565	11458	13108	4.39032	4.05911	4.11754	4	1	1	1	5	2	2	2	A0A140TA72	0.993358	0	0.00663248	8.25e-06	0	9.54e-07	0.641927	0.0910122	0.161254	0.0777862
>Proteimics identification	302	P0C8F1	P0C8F1	PATE4	Prostate and testis expressed protein 4	213;476	1307;1308;625;626	P0C8F1	2	2	NO	23.5	23.5	11.407	98	15.89	0	2	2	>Quantification	P0C8F1	P0C8F1			510760	296320	214440	5.70822	5.47176	5.33131	2	2	2	2	2	2	2	2	P0C8F1	0.317903	0.000352064	0.304298	0.304889	0.0367877	0.0357706	0.312349	0.00582022	0.281031	0.286811
>Proteimics identification	370	P30043	P30043	BLVRB	Flavin reductase (NADPH)	1701;1835	4553;4554;4555;4954	P30043	2	2	NO	14.6	14.6	22.119	206	20.59	0	2	1	>Quantification	P30043				67247	44724	22523	4.82767	4.65054	4.35263	3	3	3	3	1	1	1	1	P30043	0.147411	0.117779	0.12466	0.0413594	0.378531	0.19026	0.250652	0.117709	0.291373	0
>Proteimics identification	75	H0Y6A4	H0Y6A4	PAEP	Glycodelin (Fragment)	831;1764;1793	2267;2268;2269;2270;4709;4710;4711;4771;4772;4773;4774;4775;4776;4777;4778;4779;4780;4781;4782;4783;4784;4785;4786;4787;4788;4789;4790;4791;4792;4793;4794;4795;4796;4797;4798;4799;4800;4801;4802	H0Y6A4;H0Y4U4;Q5T6T6;A6XNE0;P09466-2;P09466	3	1	YES	34.1	15.9	14.802	126	53.695	0	1	1	>Quantification	H0Y6A4		H0Y6A4	H0Y6A4	294090	113800	180300	5.46848	5.05614	5.256	18	1	1	1	21	2	2	2	H0Y6A4	0	4.01e-05	0	0.996353	0	0.00360703	0.0617594	0.0443068	0.621073	0.0395886
>Proteimics identification	61	A0A1B0GUS4	A0A1B0GUS4	UBE2L5	HCG1789360	1610	4352	A0A1B0GUS4;P68036-2;P68036;P68036-3	1	1	YES	14.3	14.3	17.875	154	11.318	0	1	0	>Quantification	A0A1B0GUS4			A0A1B0GUS4	22376	22376	0	4.34978	4.34978	#NUM!	1	1	1	1	0	0	0	0	A0A1B0GUS4	0.126356	0.0744618	0.162589	0.0435892	0.333216	0.259788
>Proteimics identification	448	Q06828	Q06828	FMOD	Fibromodulin	912;1515	2496;4127;4128	Q06828	2	2	NO	8.8	8.8	43.178	376	16.075	0	1	2	>Quantification	Q06828	Q06828			54330	25436	28894	4.73504	4.40545	4.46081	1	1	1	1	2	2	2	2	Q06828	0.181475	0.0954077	0.123774	0.083138	0.226519	0.289687	0.0438022	0.0306111	0.240493	0.0499278
>Proteimics identification	198	I3L3Y1	I3L3Y1	CRYM	Ketimine reductase mu-crystallin (Fragment)	497	1372;1373	I3L3Y1;I3L325;Q14894	1	1	YES	21.6	21.6	10.354	97	8.5714	0	1	1	>Quantification	I3L3Y1		I3L3Y1	I3L3Y1	31087	21588	9498.7	4.49258	4.33421	3.97766	1	1	1	1	1	1	1	1	I3L3Y1	0	6.46e-07	0	0	0.999999	0	0	0.0934472	0.424975	0
>Proteimics identification	31	A0A0A0MSQ0	A0A0A0MSQ0	PLS3	Plastin-3	1129;1894	2998;2999;5079;5080	A0A0A0MSQ0;P13797-3;P13797-2;P13797	2	1	YES	3.4	1.9	69.334	617	6.6216	0.0020964	1	1	>Quantification	A0A0A0MSQ0		A0A0A0MSQ0	A0A0A0MSQ0	2852.1	1295.1	1557	3.45516	3.1123	3.19229	2	1	1	1	2	1	1	1	A0A0A0MSQ0	0	6.46e-07	0	0	0.999999	0	1.62e-05	0	0.996781	0
>Proteimics identification	23	A0A096LPE1	A0A096LPE1	VCL	Vinculin	60	160	A0A096LPE1;P18206-2;P18206	1	1	YES	36.8	36.8	6.0869	57	12.537	0	1	0	>Quantification	A0A096LPE1		A0A096LPE1	A0A096LPE1	33656	33656	0	4.52706	4.52706	#NUM!	1	1	1	1	0	0	0	0	A0A096LPE1	0	6.46e-07	0	0	0.999999	0
>Proteimics identification	307	X6RA14	X6RA14	ESD	S-formylglutathione hydrolase	214	627;628	X6RA14;P10768	1	1	YES	7.9	7.9	28.226	253	10.251	0	1	1	>Quantification	X6RA14		X6RA14	X6RA14	14545	7089.2	7455.4	4.16271	3.8506	3.87247	1	1	1	1	1	1	1	1	X6RA14	0	6.46e-07	0	0	0.999999	0	0.305966	0	0.299344	0
>Proteimics identification	527	Q9UIQ6-3	Q9UIQ6	LNPEP	Isoform 3 of Leucyl-cystinyl aminopeptidase	101	252	Q9UIQ6-3;Q9UIQ6-2;Q9UIQ6	1	1	YES	1.5	1.5	115.06	1006	6.2411	0.0095969	1	0	>Quantification	Q9UIQ6-3		Q9UIQ6-3	Q9UIQ6-3	1374.2	1374.2	0	3.13805	3.13805	#NUM!	1	1	1	1	0	0	0	0	Q9UIQ6-3	6.49e-10	0	4.16e-05	0	0	0.999958
>Proteimics identification	529	Q9UK41	Q9UK41	VPS28	Vacuolar protein sorting-associated protein 28 homolog	1391	3771	Q9UK41	1	1	YES	6.8	6.8	25.425	221	6.9213	0	1	0	>Quantification	Q9UK41		Q9UK41	Q9UK41	5516.3	5516.3	0	3.74165	3.74165	#NUM!	1	1	1	1	0	0	0	0	Q9UK41	6.49e-10	0	4.16e-05	0	0	0.999958
>Proteimics identification	144	E9PLL0	E9PLL0	MVB12A	Multivesicular body subunit 12A (Fragment)	1116	2973;2974	E9PLL0;E9PQA6;Q96EY5-2;Q96EY5-3;Q96EY5	1	1	YES	12.4	12.4	12.987	121	15.746	0	1	1	>Quantification	E9PLL0				44836	24402	20434	4.65163	4.38743	4.31035	1	1	1	1	1	1	1	1	E9PLL0	0	0.997061	0	0.00290191	3.75e-05	0	0.44143	0	0.00285329	0
>Proteimics identification	204	K7EJ46-3	K7EJ46	SMIM22	Isoform 3 of Small integral membrane protein 22	152	428;429	K7EJ46-3;K7EJ46-2;K7EJ46	1	1	YES	20.5	20.5	9.2487	83	11.404	0	1	1	>Quantification	K7EJ46-3				441570	248990	192580	5.645	5.39618	5.28461	1	1	1	1	1	1	1	1	K7EJ46-3	0	0.997061	0	0.00290191	3.75e-05	0	0	0.167105	0.146511	0.143639
>Proteimics identification	114	D6RGG3	D6RGG3	COL12A1	Collagen alpha-1(XII) chain	1114;1745	2969;4673	D6RGG3;Q99715-4;Q99715	2	2	NO	1	1	333.2	3062	12.486	0	1	1	>Quantification	D6RGG3			D6RGG3	695.62	376.65	318.97	2.84237	2.57594	2.50375	1	1	1	1	1	1	0	0	D6RGG3	0	0.997061	0	0.00290191	3.75e-05	0
>Proteimics identification	326	P14550	P14550	AKR1A1	Alcohol dehydrogenase [NADP(+)]	75;322;735	189;190;2016;902	P14550	3	3	NO	12.6	12.6	36.573	325	18.589	0	1	3	>Quantification	P14550	P14550			69076	32618	36458	4.83933	4.51346	4.56179	1	1	1	1	3	3	2	2	P14550	0.157872	0.0930482	0.145889	0.0689606	0.263359	0.270872	0.140951	0.128742	0.200807	0.139618
>Proteimics identification	404	P49588	P49588	AARS	Alanine--tRNA ligase, cytoplasmic	432;1322	1188;3584;3585	P49588;P49588-2	2	2	NO	3.9	3.9	106.81	968	17.637	0	2	1	>Quantification	P49588			P49588	4366.7	2764.2	1602.5	3.64015	3.44157	3.2048	2	2	1	1	1	1	0	0	P49588	1.56e-05	0	0.996663	0	0.00331696	4.88e-06
>Proteimics identification	62	A0A1W2PR79	A0A1W2PR79	ITCH	E3 ubiquitin-protein ligase Itchy homolog (Fragment)	1467	3984;3985	A0A1W2PR79;Q96J02-2;Q96J02	1	1	YES	10.8	10.8	17.303	158	8.1425	0	1	1	>Quantification	A0A1W2PR79		A0A1W2PR79	A0A1W2PR79	12479	6309.3	6169.8	4.09618	3.79998	3.79027	1	1	1	1	1	1	1	1	A0A1W2PR79	1.56e-05	0	0.996663	0	0.00331696	4.88e-06	0.99362	0	0.00637059	8.25e-06
>Proteimics identification	487	Q92791	Q92791	P3H4	Endoplasmic reticulum protein SC65	256	711	Q92791	1	1	YES	3.9	3.9	50.381	437	6.2328	0.0095785	1	0	>Quantification	Q92791			Q92791	1248.2	1248.2	0	3.09628	3.09628	#NUM!	1	1	1	1	0	0	0	0	Q92791	1.56e-05	0	0.996663	0	0.00331696	4.88e-06
>Proteimics identification	115	D6RHI9	D6RHI9	RNASET2	Ribonuclease T2 (Fragment)	326;453;818;922;1081;1340;1582;1729;1730	1243;1244;1245;1246;2232;2517;2518;2519;2520;2907;3617;4292;4640;4641;4642;4643;908;909;910	D6RHI9;O00584	9	9	NO	47.8	47.8	29.114	253	68.942	0	6	8	>Quantification	D6RHI9	D6RHI9			1749100	896570	852490	6.24281	5.95258	5.93069	9	9	9	8	10	10	9	7	D6RHI9	0.273283	0.101188	0.168237	0.105962	0.159481	0.191849	0.220007	0.118971	0.1728	0.120986
>Proteimics identification	108	C9JS50	C9JS50	STEAP4	Metalloreductase STEAP4	40;431;908	107;108;1187;2490	C9JS50;Q687X5-2;Q687X5	3	3	NO	13.3	13.3	38.579	339	19.059	0	2	2	>Quantification	C9JS50	C9JS50			56222	32887	23334	4.74991	4.51702	4.36799	2	2	2	2	2	2	2	2	C9JS50	0.232495	0.0711692	0.119737	0.0922679	0.182461	0.30187	0.0752095	0.156257	0.0968769	0.117213
>Proteimics identification	39	A0A0B4J231	A0A0B4J231	IGLL5	Immunoglobulin lambda-like polypeptide 5	102;135;1890	253;254;329;5070;5071;5072;5073	A0A0B4J231;P0CG04;B9A064	3	1	YES	25.1	8.8	23.15	215	9.2518	0	1	1	>Quantification	A0A0B4J231	A0A0B4J231			49411	24142	25269	4.69382	4.38277	4.40259	4	1	1	1	3	1	1	1	A0A0B4J231	0.174272	0.128465	0.139963	0.134498	0.257284	0.165517	0.165527	0.0715773	0.189275	0.0691587
>Proteimics identification	47	P0DMV9	P0DMV9	HSPA1B	Heat shock 70 kDa protein 1B	44;227;433;553;848;887;1499;1697;1922	116;117;1189;1190;1549;1550;2346;2347;2439;2440;2441;2442;4082;4083;4084;4085;4086;4087;4540;4541;5136;655	P0DMV9;P0DMV8;A0A0G2JIW1	9	2	NO	21.5	6.4	70.051	641	86.772	0	2	2	>Quantification	P0DMV9	P0DMV9			42200	23544	18656	4.62531	4.37188	4.27082	11	7	5	4	11	7	5	5	P0DMV9	0.180528	0.0665994	0.146113	0.0732584	0.248669	0.284832	0.166388	0.0853738	0.127375	0.075716
>Proteimics identification	55	E5RFG9	E5RFG9	CES5A	Carboxylic ester hydrolase	466;1794;1837	1284;1285;4803;4804;4805;4806;4956;4957;4958;4959	E5RFG9;A0A140TA60	3	1	YES	6.8	2	60.637	545	20.377	0	1	1	>Quantification	E5RFG9				51894	20978	30916	4.71512	4.32176	4.49018	5	2	2	2	5	2	2	2	E5RFG9	0.157671	0	0.138349	0.000378791	0.458669	0.244932	0.207294	0	0.114982	0.000772517
>Proteimics identification	88	H0YH88	H0YH88	NAP1L1	Nucleosome assembly protein 1-like 1 (Fragment)	706	1948	H0YH88;H0YHC3;F8W020;F8W118;F8VXI6;F8VUX1;F8VY35;F8VV59;F8W543;B7Z9C2;F8W0J6;F5H4R6;H0YIV4;P55209-3;P55209-2;P55209	1	1	YES	6.2	6.2	20.966	177	7.6952	0	1	0	>Quantification	H0YH88			H0YH88	6815.5	6815.5	0	3.8335	3.8335	#NUM!	1	1	1	1	0	0	0	0	H0YH88	0.158885	0.0644116	0.164258	0.0624086	0.287248	0.262789
>Proteimics identification	229	O60635	O60635	TSPAN1	Tetraspanin-1	1746	4674;4675;4676;4677	O60635	1	1	YES	5.4	5.4	26.301	241	12.582	0	1	1	>Quantification	O60635	O60635			6017500	2880500	3137100	6.77942	6.45947	6.49653	2	2	2	2	2	2	2	2	O60635	0.130281	0.517904	0.0644511	0.0164973	0.104419	0.166447	0.128469	0.516899	0.0689323	0.0188071
>Proteimics identification	387	X6RJP6	X6RJP6	TAGLN2	Transgelin-2 (Fragment)	242	682	X6RJP6;P37802;P37802-2	1	1	YES	7.5	7.5	21.086	187	6.2818	0.0077369	1	0	>Quantification	X6RJP6			X6RJP6	5152.9	5152.9	0	3.71205	3.71205	#NUM!	1	1	1	1	0	0	0	0	X6RJP6	0.18291	0.0754274	0.145768	0.0860223	0.22506	0.284812
>Proteimics identification	145	E9PMR6	E9PMR6	ARHGEF12	Rho guanine nucleotide exchange factor 12	1525	4145	E9PMR6;Q9NZN5-2;Q9NZN5	1	1	YES	0.9	0.9	161.91	1441	6.6292	0.0021008	1	0	>Quantification	E9PMR6			E9PMR6	28289	28289	0	4.45162	4.45162	#NUM!	1	1	1	1	0	0	0	0	E9PMR6	0.155016	0.07865	0.160953	0.0688614	0.29703	0.239489
>Proteimics identification	480	Q8NGL7	Q8NGL7	OR4P4	Olfactory receptor 4P4	1335	3605	Q8NGL7	1	1	YES	3.8	3.8	35.795	312	-2	1	1	0	>Quantification	Q8NGL7			Q8NGL7	0	0	0	#NUM!	#NUM!	#NUM!	1	1	1	1	0	0	0	0	Q8NGL7	0.0836173	0.0208135	0.0535997	0.0187494	0.0660539	0.757166
>Proteimics identification	106	C9JPM4	C9JPM4	ARF4	ADP-ribosylation factor 4 (Fragment)	234;902	2479;666;667	C9JPM4;P18085	2	1	YES	16.5	7.9	14.553	127	6.3534	0.0059406	1	1	>Quantification	C9JPM4				29412	15334	14078	4.46852	4.18566	4.14854	1	1	1	1	2	1	1	1	C9JPM4	0.134527	0.039235	0.17643	0.0505515	0.38718	0.212075	0.148148	0.0769421	0.146143	0
>Proteimics identification	531	Q9UM22	Q9UM22	EPDR1	Mammalian ependymin-related protein 1	85;1054;1585	210;2848;2849;2850;4299	Q9UM22	3	3	NO	14.3	14.3	25.437	224	19.383	0	1	3	>Quantification	Q9UM22	Q9UM22			116630	37283	79351	5.06681	4.57151	4.89955	2	2	2	2	3	3	3	3	Q9UM22	0.0982452	0.583212	0.0593881	0.033216	0.103433	0.122505	0.183566	0.157859	0.115547	0.0854666
>Proteimics identification	423	P63261	P63261	ACTG1	Actin, cytoplasmic 2	141;142;305;310;348;449;811;837;1029;1584;1692;1725	1234;1235;2218;2219;2288;2289;2789;2790;363;364;365;4295;4296;4297;4298;4530;4629;4630;4631;4632;871;882;968;969	P63261;P60709	12	5	NO	45.3	27.2	41.792	375	101.22	0	3	5	>Quantification	P63261	P63261			1293900	559510	734340	6.1119	5.74781	5.8659	12	4	3	3	12	6	5	5	P63261	0.199649	0.0592793	0.328999	0.0647962	0.16739	0.179885	0.100591	0.0511124	0.15564	0.0468463
>Proteimics identification	70	F5H4Q5	F5H4Q5	VPS37C	Vacuolar protein sorting-associated protein 37C (Fragment)	594;625;1279	1643;1644;1723;1724;1725;3481	F5H4Q5;A5D8V6	3	3	NO	34.5	34.5	17.143	148	19.058	0	2	3	>Quantification	F5H4Q5				82619	35077	47542	4.91708	4.54502	4.67708	3	3	3	3	3	3	3	3	F5H4Q5	0.248347	0	0.5	2.06e-06	0.00165848	0.249992	0.0629888	0.0242475	0.0458687	0.0179763
>Proteimics identification	227	O43653	O43653	PSCA	Prostate stem cell antigen	144;664	1805;370;371;372	O43653	2	2	NO	22	22	12.912	123	15.034	0	1	2	>Quantification	O43653				797230	550730	246500	5.90158	5.74094	5.39182	2	2	2	2	2	2	2	2	O43653	0	0.0513552	0.828819	0	0.00424145	0.115585	0.0396615	0.0609402	0.697863	0
>Proteimics identification	22	A0A087X2E9	A0A087X2E9	GSTP1	Glutathione S-transferase P (Fragment)	612	1688;1689;1690;1691	A0A087X2E9;A8MX94;P09211	1	1	YES	20.3	20.3	8.7859	79	11.561	0	1	1	>Quantification	A0A087X2E9	A0A087X2E9			320800	167850	152950	5.50623	5.22492	5.18455	2	2	2	2	2	2	2	2	A0A087X2E9	0.1843	0.0910547	0.139434	0.0910172	0.21893	0.275264	0.172571	0.0856269	0.141853	0.101647
>Proteimics identification	327	P14555	P14555	PLA2G2A	Phospholipase A2, membrane associated	184	556;557	P14555	1	1	YES	6.9	6.9	16.083	144	7.341	0	1	1	>Quantification	P14555	P14555			457430	241540	215890	5.66032	5.38299	5.33423	1	1	1	1	1	1	1	1	P14555	0.0777395	0.0396018	0.235958	0.0377662	0.293178	0.315757	0.0829982	0.0404855	0.227869	0.0316717
>Proteimics identification	301	Q6P452	Q6P452	ANXA4	Annexin	721;1476	1981;1982;4005	Q6P452;P09525	2	2	NO	10.7	10.7	33.552	299	11.957	0	1	2	>Quantification	Q6P452				18318	4848.4	13469	4.26288	3.6856	4.12934	1	1	1	1	2	2	1	1	Q6P452	0.192251	0.125772	0	0	0.267833	0.414144	0.121942	0.0305194	0.184461	0.0455593
>Proteimics identification	119	E5RH35	E5RH35	CPQ	Carboxypeptidase Q (Fragment)	56;61	153;154;161	E5RH35;E5RJZ7;E5RJP8;E5RJA8;Q9Y646	2	2	NO	20	20	14.594	130	33.306	0	1	2	>Quantification	E5RH35	E5RH35			168760	59334	109420	5.22727	4.7733	5.0391	1	1	1	1	2	2	2	2	E5RH35	0.147117	0.0796194	0.173436	0.0932319	0.180606	0.325989	0.185102	0.0802378	0.151034	0.101667
>Proteimics identification	133	E9PFW2	E9PFW2	MANBA	Beta-mannosidase	1646;1800	4416;4417;4418;4419;4860;4861	E9PFW2;O00462	2	2	NO	3	3	94.411	822	17.077	0	1	2	>Quantification	E9PFW2	E9PFW2			56811	20106	36705	4.75443	4.30333	4.56473	2	2	2	2	4	4	4	4	E9PFW2	0.149723	0.120631	0.145628	0.0947545	0.183176	0.306087	0.156084	0.0930819	0.174548	0.0813698
>Proteimics identification	500	Q99497	Q99497	PARK7	Protein/nucleic acid deglycase DJ-1	98;373;427;745;1831	1057;1058;1059;1178;2036;2037;238;239;4942;4943	Q99497	5	5	NO	39.7	39.7	19.891	189	37.212	0	5	4	>Quantification	Q99497	Q99497			1280700	793280	487440	6.10745	5.89943	5.68792	6	6	6	5	4	4	4	4	Q99497	0.24712	0.10464	0.0881433	0.0900592	0.205128	0.264909	0.22828	0.0946194	0.191255	0.0899511
>Proteimics identification	57	A0A182DWH7	A0A182DWH7	SELENOP	Selenoprotein P (Fragment)	197	585;586	A0A182DWH7;P49908	1	1	YES	2.6	2.6	35.116	310	6.4146	0.0060362	1	1	>Quantification	A0A182DWH7	A0A182DWH7			63615	31153	32462	4.80356	4.4935	4.51138	1	1	1	1	1	1	1	1	A0A182DWH7	0.165389	0.0881084	0.147289	0.0812144	0.194471	0.323529	0.178575	0.0940326	0.152892	0.0941917
>Proteimics identification	33	A0A0D9SF41	A0A0D9SF41	DOCK9	Dedicator of cytokinesis 9, isoform CRA_a	1241	3414	A0A0D9SF41;A0A0A0MT38;Q9BZ29-3;Q9BZ29;Q9BZ29-4	1	1	YES	26.1	26.1	7.1011	69	-2	1	1	0	>Quantification	A0A0D9SF41			A0A0D9SF41	161660	161660	0	5.2086	5.2086	#NUM!	1	1	1	1	0	0	0	0	A0A0D9SF41	0.171658	0.058153	0.166357	0.0656162	0.258177	0.280039
>Proteimics identification	420	P56851	P56851	EDDM3B	Epididymal secretory protein E3-beta	1253	3433;3434;3435	P56851	1	1	YES	7.5	7.5	17.584	147	9.0564	0	1	1	>Quantification	P56851	P56851			565590	442250	123330	5.7525	5.64567	5.09107	2	2	2	2	1	1	1	1	P56851	0.180054	0.0758791	0.363582	0.0793134	0.182403	0.118769	0.171757	0.0738533	0.352828	0.0859253
>Proteimics identification	409	P52209-2	P52209	PGD	Isoform 2 of 6-phosphogluconate dehydrogenase, decarboxylating	1202;1299	3260;3261;3524;3525	P52209-2;P52209	2	2	NO	7.2	7.2	51.872	470	19.979	0	2	2	>Quantification	P52209-2				31574	14708	16866	4.49933	4.16755	4.22701	2	2	1	1	2	2	2	2	P52209-2	0.210095	0.105429	0.311652	0.116149	0.256676	0	0.256859	0.0599115	0.298442	0.0922764
>Proteimics identification	196	I3L3C5	I3L3C5	BAIAP2	Brain-specific angiogenesis inhibitor 1-associated protein 2	67;807	170;2210	I3L3C5;I3L0M4;I3L3J7;I3L327;I3L4C2;Q9UQB8-3;Q9UQB8-5;Q9UQB8-4;Q9UQB8-6;Q9UQB8-2;Q9UQB8	2	2	NO	17	17	11.907	106	11.021	0	1	1	>Quantification	I3L3C5	I3L3C5			50720	20358	30362	4.70518	4.30874	4.48233	1	1	1	1	1	1	1	1	I3L3C5	0.212214	0.0490888	0.124094	0.0605725	0.262261	0.291769	0.218466	0.0762311	0.157416	0.0679897
>Proteimics identification	20	H0YBE4	H0YBE4	GPX3	Glutathione peroxidase 3 (Fragment)	1966	5254;5255	H0YBE4;A0A087X1J7;P22352	1	1	YES	21.5	21.5	8.733	79	14.767	0	1	1	>Quantification	H0YBE4	H0YBE4			248200	130530	117670	5.3948	5.11571	5.07067	1	1	1	1	1	1	1	1	H0YBE4	0.0511933	0.214506	0.0147852	0.125936	0.04871	0.54487	0.0729699	0.212156	0.0492228	0.106414
>Proteimics identification	521	Q9UBR2	Q9UBR2	CTSZ	Cathepsin Z	1319	3573;3574	Q9UBR2	1	1	YES	4	4	33.868	303	12.223	0	1	1	>Quantification	Q9UBR2	Q9UBR2			154520	92407	62112	5.18898	4.9657	4.79318	1	1	1	1	1	1	1	1	Q9UBR2	0.159334	0.164723	0.192836	0.146391	0.165426	0.17129	0.157968	0.155514	0.191101	0.159387
>Proteimics identification	532	Q9UNW1	Q9UNW1	MINPP1	Multiple inositol polyphosphate phosphatase 1	323;1017;1787	2763;4758;4759;903	Q9UNW1	3	3	NO	9.9	9.9	55.051	487	29.25	0	3	1	>Quantification	Q9UNW1	Q9UNW1			46689	30166	16523	4.66921	4.47952	4.21809	3	3	3	3	1	1	1	1	Q9UNW1	0.123466	0.104931	0.137589	0.105055	0.106144	0.422816	0.12974	0.0843994	0.216133	0.0741075
>Proteimics identification	403	P49223	P49223	SPINT3	Kunitz-type protease inhibitor 3	298;351	853;854;855;856;975;976;977;978;979	P49223	2	2	NO	19.1	19.1	10.252	89	18.39	0	2	2	>Quantification	P49223	P49223			2451500	1290200	1161300	6.38943	6.11066	6.06494	4	4	4	4	5	5	5	5	P49223	0.223777	0.0357245	0.311772	0.111509	0.196359	0.120858	0.210715	0.0463706	0.327159	0.118393
>Proteimics identification	485	Q92520	Q92520	FAM3C	Protein FAM3C	1070	2886;2887	Q92520	1	1	YES	7	7	24.68	227	8.7585	0	1	1	>Quantification	Q92520	Q92520			36871	19436	17435	4.56668	4.28861	4.24142	1	1	1	1	1	1	1	1	Q92520	0.0911238	0.092367	0.492681	0.067307	0.117049	0.139471	0.0731505	0.109643	0.533536	0.0480025
>Proteimics identification	43	A0A0C4DFZ2	A0A0C4DFZ2	ARSA	Arylsulfatase A	325;692;1400	1900;1901;3789;3790;905;906;907	A0A0C4DFZ2;P15289-2;P15289	3	3	NO	10.8	10.8	53.806	509	45.9	0	3	3	>Quantification	A0A0C4DFZ2	A0A0C4DFZ2			117830	74147	43687	5.07126	4.87009	4.64035	4	4	3	3	3	3	2	2	A0A0C4DFZ2	0.184504	0.120296	0.230176	0.103257	0.162363	0.199403	0.155231	0.0769059	0.205654	0.0860227
>Proteimics identification	137	E9PI70	E9PI70	CHID1	Chitinase domain-containing protein 1 (Fragment)	629	1736;1737	E9PI70;E9PIP0;E9PRL3;E9PPH0;E9PPA0;Q9BWS9-3;Q9BWS9;Q9BWS9-2	1	1	YES	10.4	10.4	12.924	115	6.7781	0	1	1	>Quantification	E9PI70	E9PI70			117960	54590	63374	5.07173	4.73711	4.80191	1	1	1	1	1	1	1	1	E9PI70	0.123905	0.181883	0.236941	0.148916	0.164661	0.143694	0.16774	0.198343	0.202651	0.133585
>Proteimics identification	138	E9PIF4	E9PIF4	NEU1	Sialidase-1	782	2155;2156	E9PIF4;Q99519	1	1	YES	3.7	3.7	29	267	6.3832	0.006012	1	1	>Quantification	E9PIF4	E9PIF4			65135	34525	30611	4.81381	4.53813	4.48588	1	1	1	1	1	1	1	1	E9PIF4	0.158766	0.155741	0.213901	0.141441	0.149338	0.180814	0.162659	0.136461	0.217168	0.150422
>Proteimics identification	142	E9PKE3	E9PKE3	HSPA8	Heat shock cognate 71 kDa protein	120;209;554;886;1118;1500;1697;1734	1551;2437;2438;295;2976;2977;2978;2979;4088;4089;4540;4541;4649;614;615;616;617	E9PKE3;P11142	8	3	NO	14.5	6.5	68.805	627	18.212	0	2	3	>Quantification	E9PKE3	E9PKE3			114460	31469	82990	5.05865	4.49788	4.91903	8	3	3	3	9	4	3	3	E9PKE3	0.150589	0.102619	0.199055	0.0992859	0.226143	0.222309	0.172267	0.0766829	0.148877	0.0935964
>Proteimics identification	491	Q93099	Q93099	HGD	Homogentisate 1,2-dioxygenase	252;740	2024;702;703;704;705	Q93099	2	2	NO	5.2	5.2	49.963	445	18.908	0	1	2	>Quantification	Q93099	Q93099			69807	30512	39295	4.8439	4.48447	4.59434	2	2	2	2	3	3	3	3	Q93099	0.0869979	0.158898	0.0584868	0.0422396	0.119879	0.533499	0.126149	0.118696	0.100316	0.0575521
>Proteimics identification	101	C9JIS1	C9JIS1	GNB2	Guanine nucleotide-binding protein G(I)/G(S)/G(T) subunit beta-2 (Fragment)	1080;1631	2906;4391	C9JIS1;C9JXA5;E7EP32;P62879	2	1	YES	9.9	5.2	25.538	232	7.62	0	1	0	>Quantification	C9JIS1			C9JIS1	34812	34812	0	4.54173	4.54173	#NUM!	2	1	1	1	0	0	0	0	C9JIS1	0.207317	0.0599632	0.115514	0.0598181	0.211587	0.3458
>Proteimics identification	86	F8VZU9	F8VZU9	MYL6	Myosin light polypeptide 6	1773	4731;4732	F8VZU9;G3V1Y7;F8VPF3;F8W1R7;J3KND3;G8JLA2;G3V1V0;F8W180;B7Z6Z4;P60660-2;P60660	1	1	YES	15.5	15.5	11.677	103	11.448	0	1	1	>Quantification	F8VZU9	F8VZU9			39156	17888	21268	4.5928	4.25256	4.32773	1	1	1	1	1	1	1	1	F8VZU9	0.178109	0.0822702	0.142774	0.0572056	0.290417	0.249224	0.185108	0.0740663	0.159204	0.0918235
>Proteimics identification	535	Q9Y287	Q9Y287	ITM2B	Integral membrane protein 2B	538;1281	1515;1516;3484;3485	Q9Y287	2	2	NO	7.1	7.1	30.338	266	19.265	0	2	2	>Quantification	Q9Y287	Q9Y287			72245	34981	37264	4.85881	4.54383	4.57129	2	2	2	2	2	2	2	2	Q9Y287	0.0420749	0.144917	0.119972	0.058356	0.558806	0.0758738	0.107703	0.151827	0.186614	0.0942187
>Proteimics identification	63	A0A286YEY1	A0A286YEY1	IGHA1	Immunoglobulin heavy constant alpha 1 (Fragment)	230;285;1359;1626;1679;1876	3667;3668;3669;3670;4384;4489;4490;5040;5041;659;660;661;662;826;827;828	A0A286YEY1;P01876	6	6	NO	21.6	21.6	42.848	398	85.949	0	6	5	>Quantification	A0A286YEY1	A0A286YEY1			1102200	620260	481990	6.04226	5.79257	5.68304	8	8	8	7	8	8	7	5	A0A286YEY1	0.472279	0.0341595	0.060863	0.0959435	0.275924	0.0608313	0.501658	0.043002	0.0829208	0.118885
>Proteimics identification	150	H0YGN8	H0YGN8	STARD10	START domain-containing protein 10 (Fragment)	1458	3966;3967	H0YGN8;H0YH17;H0YGA9;H0YFF3;F5GY11;F5H1Z6;F5H8H3;Q9Y365	1	1	YES	10.7	10.7	13.265	121	6.2483	0.0096154	1	1	>Quantification	H0YGN8	H0YGN8			46266	24113	22153	4.66526	4.38225	4.34543	1	1	1	1	1	1	1	1	H0YGN8	0.115136	0.0589533	0.218811	0.0665274	0.313179	0.227394	0.187442	0.0943794	0.141441	0.064209
>Proteimics identification	355	P22692-2	P22692	IGFBP4	Isoform 2 of Insulin-like growth factor-binding protein 4	1135;1638	3010;4403	P22692-2;P22692	2	2	NO	14.6	14.6	17.635	158	10.844	0	2	0	>Quantification	P22692-2			P22692-2	138890	138890	0	5.14267	5.14267	#NUM!	2	2	2	2	0	0	0	0	P22692-2	0.127548	0.246822	0.0256896	0.298594	0.130224	0.171123
>Proteimics identification	530	Q9UL25	Q9UL25	RAB21	Ras-related protein Rab-21	700	1935;1936	Q9UL25	1	1	YES	4.9	4.9	24.347	225	6.3359	0.0058939	1	1	>Quantification	Q9UL25	Q9UL25			22238	11061	11178	4.3471	4.04379	4.04836	1	1	1	1	1	1	1	1	Q9UL25	0.186758	0.0571245	0.173232	0.0971545	0.280295	0.205436	0.176669	0.0552938	0.120625	0.0781012
>Proteimics identification	398	P45974-2	P45974	USP5	Isoform Short of Ubiquitin carboxyl-terminal hydrolase 5	537;953	1514;2601;2602	P45974-2;P45974	2	2	NO	3	3	93.307	835	11.962	0	2	1	>Quantification	P45974-2	P45974-2			7402.4	4419.1	2983.3	3.86937	3.64533	3.4747	2	2	1	1	1	1	1	1	P45974-2	0.173888	0.0786192	0.145414	0.0447864	0.284698	0.272594	0.166097	0.0806703	0.135624	0.0467178
>Proteimics identification	306	P10599-2	P10599	TXN	Isoform 2 of Thioredoxin	1594	4317;4318;4319	P10599-2;P10599	1	1	YES	15.3	15.3	9.4519	85	7.4965	0	1	1	>Quantification	P10599-2	P10599-2			181550	73556	107990	5.259	4.86662	5.03338	1	1	1	1	2	2	2	2	P10599-2	0.166265	0.0941978	0.163987	0.0751611	0.252246	0.248143	0.155658	0.0827739	0.160975	0.0810406
>Proteimics identification	26	A0A0A0MRM8	A0A0A0MRM8	MYO6	Unconventional myosin-VI	949;1196	2591;3246;3247	A0A0A0MRM8;A0A0D9SGC1;E7EW20;Q9UM54-5;Q9UM54-2;Q9UM54-6;Q9UM54-4;Q9UM54-1;Q9UM54	2	2	NO	2.2	2.2	145.01	1253	13.34	0	1	2	>Quantification	A0A0A0MRM8	A0A0A0MRM8			1751.9	559.36	1192.5	3.24351	2.74769	3.07646	1	1	1	1	2	2	2	2	A0A0A0MRM8	0.125807	0.0735072	0.195327	0.0385516	0.275452	0.291355	0.087762	0.11125	0.224682	0.0744433
>Proteimics identification	37	A0A0A0MTN3	A0A0A0MTN3	GSTM3	Glutathione S-transferase	1034;1107	2807;2808;2809;2952	A0A0A0MTN3;P21266	2	2	NO	13.2	13.2	24.914	212	13.713	0	2	1	>Quantification	A0A0A0MTN3	A0A0A0MTN3			23195	11649	11546	4.36539	4.06629	4.06243	2	2	1	1	2	2	2	2	A0A0A0MTN3	0.215363	0.0781715	0.286897	0.0872217	0.140516	0.19183	0.299602	0.0939139	0.445524	0.0389032
>Proteimics identification	466	Q16706	Q16706	MAN2A1	Alpha-mannosidase 2	924;925	2523;2524;2525;2526	Q16706	2	2	NO	1.8	1.8	131.14	1144	12.875	0	2	2	>Quantification	Q16706	Q16706			6880.6	3203.6	3677	3.83763	3.50564	3.56549	2	2	2	2	2	2	2	2	Q16706	0.0602165	0.0473353	0.574674	0.0405343	0.110178	0.167062	0.349395	0.0527206	0.052885	0.0355055
>Proteimics identification	96	C9JB90	C9JB90	RAB6B	Ras-related protein Rab-6B (Fragment)	1155	3145;3146	C9JB90;C9JU14;J3KR73;P20340-4;Q9NRW1-2;Q9NRW1;P20340-2;P20340;Q14964	1	1	YES	22.4	22.4	5.8575	49	7.1339	0	1	1	>Quantification	C9JB90	C9JB90			700920	379890	321030	5.84567	5.57966	5.50655	1	1	1	1	1	1	1	1	C9JB90	0.175338	0.0584514	0.16915	0.0504104	0.268977	0.277673	0.176799	0.0541572	0.173731	0.047528
>Proteimics identification	321	P13639	P13639	EEF2	Elongation factor 2	81;512;959;1619;1964	1430;202;2614;2615;4370;4371;4372;5247;5248;5249	P13639	5	5	NO	10.3	10.3	95.337	858	45.17	0	4	4	>Quantification	P13639	P13639			43411	22349	21061	4.6376	4.34926	4.32348	5	5	5	4	5	5	4	4	P13639	0.25215	0.0490117	0.133483	0.0280423	0.342573	0.194741	0.194126	0.0690575	0.176086	0.0668929
>Proteimics identification	434	Q5VTE0	Q5VTE0	EEF1A1P5	Putative elongation factor 1-alpha-like 3	429;1138;1388;1404	1183;1184;3027;3767;3768;3798;3799	Q5VTE0;P68104;Q05639	4	4	NO	8	8	50.184	462	25.058	0	4	3	>Quantification	Q5VTE0	Q5VTE0			528490	325170	203320	5.72304	5.51211	5.30818	4	4	4	4	3	3	3	3	Q5VTE0	0.172143	0.161127	0.112663	0.113429	0.215541	0.225097	0.187368	0.0633899	0.162979	0.0476079
>Proteimics identification	32	A0A0A0MT32	A0A0A0MT32	LIPA	Lysosomal acid lipase/cholesteryl ester hydrolase	290;611	1687;839	A0A0A0MT32;P38571-2;P38571	2	2	NO	9.5	9.5	32.57	283	21.3	0	1	1	>Quantification	A0A0A0MT32	A0A0A0MT32			53277	36080	17197	4.72654	4.55727	4.23545	1	1	1	1	1	1	1	1	A0A0A0MT32	0.159019	0.100604	0.314023	0.137848	0.152623	0.135883	0.143874	0.122483	0.252735	0.127487
>Proteimics identification	294	P08238	P08238	HSP90AB1	Heat shock protein HSP 90-beta	28;462;803;1297;1506;1521;1904;1914	1269;1270;1271;2204;2205;3521;3522;4107;4137;5097;5119;5120;5121;65;66	P08238	8	3	NO	12.2	4.4	83.263	724	27.631	0	2	2	>Quantification	P08238	P08238			51341	21234	30107	4.71046	4.32703	4.47867	8	2	2	2	7	2	2	2	P08238	0.172921	0.0619639	0.207469	0.054736	0.254226	0.248684	0.182882	0.0938557	0.186696	0.0784637
>Proteimics identification	511	Q9HAT2-2	Q9HAT2	SIAE	Isoform 2 of Sialate O-acetylesterase	566;863;1551;1897	1578;1579;1580;1581;1582;1583;2389;4223;4224;5085;5086	Q9HAT2-2;Q9HAT2	4	4	NO	8.8	8.8	54.572	488	35.871	0	4	3	>Quantification	Q9HAT2-2	Q9HAT2-2			214420	127420	86998	5.33127	5.10524	4.93951	6	6	5	5	5	5	5	5	Q9HAT2-2	0.206622	0.0826501	0.251623	0.0779753	0.168339	0.21279	0.235962	0.0881004	0.2484	0.0909476
>Proteimics identification	113	E5RIF1	E5RIF1	UBE2V2	Ubiquitin-conjugating enzyme E2 variant 2 (Fragment)	1098	2940	E5RIF1;D6RG00;H0YBX6;I3L0A0;Q13404-8;Q15819;Q13404;Q13404-7;Q13404-2;Q13404-1	1	1	YES	19.2	19.2	5.7715	52	6.6448	0.0021053	1	0	>Quantification	E5RIF1			E5RIF1	64648	64648	0	4.81056	4.81056	#NUM!	1	1	1	1	0	0	0	0	E5RIF1	0.176768	0.0588084	0.188438	0.0963491	0.201644	0.277993
>Proteimics identification	293	P08118	P08118	MSMB	Beta-microseminoprotein	1605;1921	4342;5135	P08118	2	2	NO	13.2	13.2	12.865	114	12.153	0	2	0	>Quantification	P08118			P08118	61221000	61221000	0	7.7869	7.7869	#NUM!	2	2	2	2	0	0	0	0	P08118	0.321511	0.0814365	0.00645649	0.174922	0.351296	0.0643774
>Proteimics identification	48	A0A0G2JN42	A0A0G2JN42	MUC6	Mucin-6	111;133;190;193;221;223;224;226;269;341;491;501;508;571;857;870;905;954;968;1000;1031;1088;1168;1334;1534;1604;1829;1856;1881;1938;1959	1359;1360;1361;1379;1380;1381;1382;1420;1421;1422;1423;1592;1593;1594;1595;2366;2367;2368;2369;2370;2371;2402;2403;2482;2483;2484;2485;2603;2634;2635;2636;271;2718;272;273;274;2793;2794;2795;2796;2797;2918;2919;3166;3167;3168;326;327;3603;3604;4164;4165;4166;4167;4341;4938;4939;4940;5005;5006;5007;5051;5052;5174;5228;5229;5230;5231;5232;566;567;568;575;642;643;646;647;648;649;650;653;654;798;799;…	A0A0G2JN42;Q6W4X9	31	31	NO	19.9	19.9	257.03	2439	323.31	0	27	28	>Quantification	A0A0G2JN42	A0A0G2JN42			6146500	3323100	2823400	6.78863	6.52154	6.45077	43	43	37	31	44	44	37	30	A0A0G2JN42	0.196079	0.175617	0.102699	0.159831	0.251842	0.105427	0.227287	0.251949	0.0786556	0.180165
>Proteimics identification	143	E9PKL7	E9PKL7	RAB2A	Ras-related protein Rab-2A	648;1916	1777;5123;5124	E9PKL7;P61019;Q8WUD1	2	2	NO	13.3	13.3	20.779	181	12.98	0	1	2	>Quantification	E9PKL7	E9PKL7			40609	16737	23871	4.60862	4.22368	4.37787	1	1	1	1	2	2	1	1	E9PKL7	0.151986	0.0554477	0.196359	0.0483915	0.277585	0.270231	0.158416	0.0625839	0.203698	0.0623898
>Proteimics identification	349	P20336	P20336	RAB3A	Ras-related protein Rab-3A	1192;1717;1891	3237;4610;5074	P20336	3	1	YES	19.1	6.8	24.984	220	6.6957	0.0021142	1	0	>Quantification	P20336			P20336	207240	207240	0	5.31647	5.31647	#NUM!	1	1	1	1	2	0	0	0	P20336	0.164603	0.046536	0.186614	0.0394853	0.286909	0.275852
>Proteimics identification	0	A0A024QZ42	A0A024QZ42	PDCD6	HCG1985580, isoform CRA_c	1919	5131;5132	A0A024QZ42;O75340-2;O75340	1	1	YES	8.3	8.3	14.45	121	8.7824	0	1	1	>Quantification	A0A024QZ42	A0A024QZ42			92144	49888	42257	4.96447	4.698	4.6259	1	1	1	1	1	1	1	1	A0A024QZ42	0.219252	0.0636515	0.12555	0.0619372	0.24127	0.288338	0.246217	0.0652309	0.123265	0.0667624
>Proteimics identification	179	H3BLU7	H3BLU7	AKR7A2	Aflatoxin B1 aldehyde reductase member 2 (Fragment)	642	1764;1765	H3BLU7;Q8NHP1;O43488	1	1	YES	4.8	4.8	34.684	314	6.9149	0	1	1	>Quantification	H3BLU7	H3BLU7			35012	19930	15082	4.54422	4.29951	4.17846	1	1	1	1	1	1	1	1	H3BLU7	0.137452	0.0688606	0.198574	0.0643219	0.331328	0.199464	0.147405	0.0453917	0.32222	0.0740877
>Proteimics identification	83	B5MBZ8	B5MBZ8	PPP1R7	Protein phosphatase 1 regulatory subunit 7	51;861	130;2386	B5MBZ8;C9JD73;C9J177;H7C003;Q15435-5;Q15435-4;Q15435-3;Q15435-2;Q15435	2	2	NO	10.6	10.6	31.357	274	11.155	0	2	0	>Quantification	B5MBZ8			B5MBZ8	26300	26300	0	4.41996	4.41996	#NUM!	2	2	1	1	0	0	0	0	B5MBZ8	0.152441	0.0633315	0.196749	0.0587162	0.273152	0.25561
>Proteimics identification	395	P43251-4	P43251	BTD	Isoform 4 of Biotinidase	229;904;1178;1688	2481;3208;4520;4521;4522;4523;657;658	P43251-4;P43251;P43251-3;P43251-2	4	4	NO	9.9	9.9	58.913	523	29.033	0	1	4	>Quantification	P43251-4	P43251-4			146380	6761.6	139620	5.16548	3.83005	5.14495	2	2	2	2	6	6	6	5	P43251-4	0.0748275	0.0495236	0.562202	0.0526145	0.118832	0.142001	0.152652	0.0789645	0.214819	0.075159
>Proteimics identification	13	Q6ICJ4	Q6ICJ4	Em:AP000351.3	Em:AP000351.3 protein	157;716	1969;489;490	Q6ICJ4;A0A087WY67;P0CG30;P0CG29	2	2	NO	9.1	9.1	25.948	230	12.649	0	1	2	>Quantification	Q6ICJ4				84078	39499	44579	4.92468	4.59659	4.64913	1	1	1	1	2	2	1	1	Q6ICJ4	0.0946791	0.277067	0	0.137307	0.379521	0.111425	0.0897788	0.288068	0	0.153639
>Proteimics identification	66	A0A286YFJ8	A0A286YFJ8	IGHG4	Immunoglobulin heavy constant gamma 4 (Fragment)	689;1304;1564;1696;1910	1894;1895;1896;3532;3533;3534;3535;4247;4248;4249;4250;4538;4539;5109;5110	A0A286YFJ8;P01861	5	2	NO	22.7	11.1	43.831	396	30.03	0	2	2	>Quantification	A0A286YFJ8	A0A286YFJ8			51262	26038	25224	4.7098	4.41561	4.40181	7	2	1	1	8	2	2	2	A0A286YFJ8	0.0190402	0.0401943	0.224161	0.0651586	0.0361093	0.615336	0.0243073	0.015114	0.100747	0.0330224
>Proteimics identification	461	Q16222-2	Q16222	UAP1	Isoform AGX1 of UDP-N-acetylhexosamine pyrophosphorylase	633	1747;1748	Q16222-2;Q16222-3;Q16222	1	1	YES	2	2	57.028	505	7.3223	0	1	1	>Quantification	Q16222-2	Q16222-2			1244.2	596.29	647.95	3.09489	2.77546	2.81154	1	1	1	1	1	1	1	1	Q16222-2	0.118502	0.0299217	0.223368	0.0220973	0.222585	0.383526	0.156473	0.0242427	0.241352	0.0211712
>Proteimics identification	1	A0A1B0GWI2	A0A1B0GWI2	CLN5	Ceroid-lipofuscinosis neuronal protein 5 (Fragment)	945;1145;1654	2584;2585;3045;4436	A0A1B0GWI2;A0A0A0MRU5;A0A024R644;O75503	3	3	NO	8.9	8.9	35.444	304	19.148	0	2	2	>Quantification	A0A1B0GWI2	A0A1B0GWI2			241410	114310	127100	5.38276	5.05808	5.10415	2	2	2	2	2	2	2	2	A0A1B0GWI2	0.182922	0.0967746	0.189577	0.104329	0.208465	0.217933	0.184371	0.0907154	0.189257	0.108984
>Proteimics identification	199	I3L397	I3L397	EIF5A	Eukaryotic translation initiation factor 5A (Fragment)	1256;1765	3440;3441;4712;4713	I3L397;I3L504;P63241;P63241-2	2	2	NO	24	24	16.019	146	24.117	0	2	2	>Quantification	I3L397	I3L397			209500	99641	109860	5.32118	4.99844	5.04084	2	2	1	1	2	2	1	1	I3L397	0.132409	0.0646542	0.210245	0.0463327	0.292079	0.254281	0.169997	0.0608935	0.219737	0.0376036
>Proteimics identification	134	E9PFZ2	E9PFZ2	CP	Ceruloplasmin	262;312	720;721;884	E9PFZ2;P00450	2	2	NO	3	3	108.82	946	14.334	0	1	2	>Quantification	E9PFZ2	E9PFZ2			16569	7363.5	9205.1	4.2193	3.86708	3.96403	1	1	1	1	2	2	1	1	E9PFZ2	0.30438	0.0145695	0.0630711	0.131358	0.341326	0.145295	0.327069	0.0457077	0.116718	0.0866157
>Proteimics identification	242	P00492	P00492	HPRT1	Hypoxanthine-guanine phosphoribosyltransferase	558	1559;1560;1561	P00492	1	1	YES	4.6	4.6	24.579	218	11.325	0	1	1	>Quantification	P00492	P00492			14562	7122.4	7440.1	4.16322	3.85263	3.87158	1	1	1	1	2	2	1	1	P00492	0.196083	0.0624583	0.341921	0.0275582	0.194292	0.177689	0.20952	0.0609027	0.334068	0.0278285
>Proteimics identification	270	P04350	P04350	TUBB4A	Tubulin beta-4A chain	450;1066;1311	1236;1237;2875;2876;3549	P04350;P68371	3	1	YES	10.1	3.8	49.585	444	17.901	0	1	1	>Quantification	P04350	P04350			93355	48892	44464	4.97014	4.68924	4.64801	2	2	2	2	3	3	3	3	P04350	0.176937	0.0619034	0.160119	0.0582328	0.174124	0.368684	0.191481	0.0592676	0.156526	0.0645006
>Proteimics identification	192	H7C2V1	H7C2V1	PLOD3	Procollagen-lysine,2-oxoglutarate 5-dioxygenase 3 (Fragment)	873	2409	H7C2V1;O60568	1	1	YES	5.6	5.6	31.129	270	6.9923	0	1	0	>Quantification	H7C2V1			H7C2V1	9656.6	9656.6	0	3.98482	3.98482	#NUM!	1	1	1	1	0	0	0	0	H7C2V1	0	0.233317	0.126415	0.234821	0.405447	0
>Proteimics identification	104	C9JLV0	C9JLV0	CPVL	Carboxypeptidase (Fragment)	988;1393	2684;2685;3775	C9JLV0;Q9H3G5	2	2	NO	5.3	5.3	27.788	244	24.422	0	1	2	>Quantification	C9JLV0	C9JLV0			191050	65778	125270	5.28115	4.81808	5.09785	1	1	1	1	2	2	2	2	C9JLV0	0.189952	0.0990578	0.276549	0.0903029	0.125113	0.219025	0.203493	0.109855	0.346957	0.0832651
>Proteimics identification	85	C9J3E2	C9J3E2	AGR2	Anterior gradient protein 2 homolog (Fragment)	805;1008	2207;2743;2744	C9J3E2;B5MC07;O95994	2	2	NO	26.7	26.7	15.014	131	17.332	0	1	2	>Quantification	C9J3E2				77617	19329	58288	4.88996	4.28621	4.76558	1	1	1	1	2	2	2	2	C9J3E2	0	0.50266	0.181062	0.315111	0	0.00116765	0.0744273	0.467592	0	0.200782
>Proteimics identification	36	A0A0A0MTJ2	A0A0A0MTJ2	SPOCK3	Sparc/osteonectin, cwcv and kazal-like domains proteoglycan (Testican) 3, isoform CRA_b	551;1047	1545;1546;2831;2832	A0A0A0MTJ2;Q9BQ16-9;Q9BQ16-7;Q9BQ16-2;Q9BQ16-5;Q9BQ16-6;Q9BQ16-4;Q9BQ16-1;Q9BQ16	2	1	YES	5.8	2.9	39.4	344	6.9466	0	1	1	>Quantification	A0A0A0MTJ2	A0A0A0MTJ2			53019	31750	21270	4.72443	4.50174	4.32777	2	1	1	1	2	1	1	1	A0A0A0MTJ2	0.201192	0.0621342	0.136771	0.0452993	0.196554	0.358049	0.221563	0.0672363	0.116645	0.0549772
>Proteimics identification	377	P31946-2	P31946	YWHAB	Isoform Short of 14-3-3 protein beta/alpha	1283;1593	3492;3493;4316	P31946-2;P31946	2	1	YES	11.1	7.8	27.85	244	29.495	0	1	0	>Quantification	P31946-2			P31946-2	12802	12802	0	4.10728	4.10728	#NUM!	2	1	1	1	1	0	0	0	P31946-2	0.215356	0.0404518	0.160572	0.066118	0.281164	0.236339
>Proteimics identification	515	Q9NQE9	Q9NQE9	HINT3	Histidine triad nucleotide-binding protein 3	1351	3647	Q9NQE9	1	1	YES	10.4	10.4	20.361	182	12.176	0	1	0	>Quantification	Q9NQE9			Q9NQE9	18890	18890	0	4.27623	4.27623	#NUM!	1	1	1	1	0	0	0	0	Q9NQE9	0.198032	0.0758414	0.152439	0.0615807	0.266239	0.245868
>Proteimics identification	287	Q5T8F0	Q5T8F0	CTSL	Cathepsin L1	1757	4694;4695;4696;4697	Q5T8F0;P07711	1	1	YES	5.3	5.3	25.5	225	6.5507	0.0041322	1	1	>Quantification	Q5T8F0	Q5T8F0			524220	270430	253790	5.71951	5.43205	5.40447	2	2	2	2	2	2	2	2	Q5T8F0	0.138579	0.164114	0.182466	0.156861	0.184145	0.173835	0.080709	0.153878	0.213185	0.156097
>Proteimics identification	356	P22732	P22732	SLC2A5	Solute carrier family 2, facilitated glucose transporter member 5	1623	4378;4379	P22732	1	1	YES	2.2	2.2	54.973	501	9.1506	0	1	1	>Quantification	P22732	P22732			32639	15402	17237	4.51374	4.18758	4.23646	1	1	1	1	1	1	1	1	P22732	0.146149	0.0267085	0.202037	0.0189418	0.188504	0.417659	0.143258	0.0364156	0.186142	0.0163539
>Proteimics identification	224	O15230	O15230	LAMA5	Laminin subunit alpha-5	283;563;574;1662	1571;1572;1573;1600;4451;822;823;824	O15230	4	4	NO	1.5	1.5	399.73	3695	43.716	0	4	2	>Quantification	O15230	O15230			10199	7578.3	2620.7	4.00856	3.87957	3.41842	6	6	5	4	2	2	2	2	O15230	0.266533	0.153014	0.134014	0.0625755	0.197611	0.186252	0.139058	0.0666345	0.144144	0.076477
>Proteimics identification	460	Q15847	Q15847	ADIRF	Adipogenesis regulatory factor	1399	3788	Q15847	1	1	YES	40.8	40.8	7.8547	76	8.4676	0	1	0	>Quantification	Q15847			Q15847	85385	85385	0	4.93138	4.93138	#NUM!	1	1	1	1	0	0	0	0	Q15847	0	0.244923	0	0.000619311	0	0.754458
>Proteimics identification	465	Q16651-2	Q16651	PRSS8	Isoform 2 of Prostasin	1305	3536	Q16651-2;Q16651	1	1	YES	6.6	6.6	30.519	289	11.578	0	1	0	>Quantification	Q16651-2			Q16651-2	161970	161970	0	5.20943	5.20943	#NUM!	1	1	1	1	0	0	0	0	Q16651-2	0.16632	0.0580641	0.183338	0.0463462	0.195531	0.350401
>Proteimics identification	78	H0YHB7	H0YHB7	MSI1	RNA-binding protein Musashi homolog 1 (Fragment)	1731	4644	H0YHB7;B4DM51;B4DHE8;Q96DH6-3;Q96DH6-2;Q96DH6;O43347	1	1	YES	5.2	5.2	25.232	233	6.3356	0.0058824	1	0	>Quantification	H0YHB7			H0YHB7	32492	32492	0	4.51178	4.51178	#NUM!	1	1	1	1	0	0	0	0	H0YHB7	0.216628	0.0753578	0.279868	0.0676895	0.138005	0.222453
>Proteimics identification	304	P10253	P10253	GAA	Lysosomal alpha-glucosidase	47;254;482;660;672;1333;1561;1830	121;122;1320;1321;1798;1799;1846;3601;3602;4244;4941;708	P10253	8	8	NO	12.7	12.7	105.32	952	88.582	0	6	6	>Quantification	P10253	P10253			165550	92914	72640	5.21893	4.96808	4.86118	6	6	6	5	6	6	5	3	P10253	0.161199	0.243606	0.143678	0.0756565	0.173421	0.202439	0.219698	0.0783195	0.205095	0.0566753
>Proteimics identification	539	Q9Y5Z4-2	Q9Y5Z4	HEBP2	Isoform 2 of Heme-binding protein 2	1300	3526;3527	Q9Y5Z4-2;Q9Y5Z4	1	1	YES	7.1	7.1	20.859	184	8.0272	0	1	1	>Quantification	Q9Y5Z4-2				73803	35843	37960	4.86807	4.5544	4.57933	1	1	1	1	1	1	1	1	Q9Y5Z4-2	0.132166	0.0494475	0.432021	0.0655083	0.182954	0.137902	0	0.07609	0.460664	0.0843937
>Proteimics identification	473	Q6UX06	Q6UX06	OLFM4	Olfactomedin-4	736;1223	2017;2018;3322;3323	Q6UX06	2	2	NO	5.5	5.5	57.279	510	12.483	0	2	2	>Quantification	Q6UX06	Q6UX06			25800	15015	10785	4.41162	4.17653	4.03282	2	2	1	1	2	2	1	1	Q6UX06	0.409222	0.04395	0.149667	0.126003	0.186181	0.0849776	0.365077	0.0488106	0.172358	0.145386
>Proteimics identification	400	P48723	P48723	HSPA13	Heat shock 70 kDa protein 13	874;875;909;1053;1119	2410;2411;2412;2413;2491;2492;2846;2847;2980	P48723	5	5	NO	9.8	9.8	51.927	471	59.422	0	5	4	>Quantification	P48723	P48723			172080	114130	57945	5.23573	5.0574	4.76302	5	5	5	5	4	4	4	4	P48723	0.131261	0.158235	0.198882	0.180759	0.140605	0.190258	0.132555	0.158656	0.195263	0.197609
>Proteimics identification	11	F5H0D2	F5H0D2	CORO1B	Coronin (Fragment)	1834	4953	F5H0D2;A0A087WW53;F5H390;Q9BR76	1	1	YES	9.4	9.4	15.283	139	6.3533	0.0059289	1	0	>Quantification	F5H0D2			F5H0D2	43318	43318	0	4.63667	4.63667	#NUM!	1	1	1	1	0	0	0	0	F5H0D2	0.192218	0.0722868	0.174901	0.0752326	0.238037	0.247324
>Proteimics identification	341	P18669	P18669	PGAM1	Phosphoglycerate mutase 1	89;1893	218;219;220;221;5077;5078	P18669	2	2	NO	13.8	13.8	28.804	254	30.79	0	2	2	>Quantification	P18669	P18669			116840	57847	58991	5.06759	4.76228	4.77079	3	3	2	2	3	3	2	2	P18669	0.19694	0.0790172	0.189037	0.0908259	0.229034	0.215146	0.208047	0.0825983	0.192598	0.0971171
>Proteimics identification	241	P00441	P00441	SOD1	Superoxide dismutase [Cu-Zn]	668;1005	1811;1812;1813;2728	P00441	2	2	NO	15.6	15.6	15.936	154	23.324	0	1	2	>Quantification	P00441	P00441			670340	71213	599120	5.8263	4.85256	5.77751	1	1	1	1	3	3	3	3	P00441	0.198223	0.0670345	0.177086	0.085286	0.22967	0.242701	0.188655	0.152524	0.141314	0.1465
>Proteimics identification	165	G3V2H1	G3V2H1	MPP5	MAGUK p55 subfamily member 5 (Fragment)	898	2464;2465	G3V2H1;Q8N3R9-2;Q8N3R9	1	1	YES	8.1	8.1	17.187	149	9.1906	0	1	1	>Quantification	G3V2H1	G3V2H1			6899.9	3307.5	3592.4	3.83884	3.5195	3.55538	1	1	1	1	1	1	1	1	G3V2H1	0.186915	0.0469611	0.151618	0.0499614	0.115513	0.449032	0.181766	0.032336	0.108647	0.0530244
>Proteimics identification	16	B4DDC6	B4DDC6	PTGES3	Prostaglandin E synthase 3	1132	3003;3004	B4DDC6;A0A087WYT3;Q15185-4;Q15185	1	1	YES	9.7	9.7	14.573	124	7.5588	0	1	1	>Quantification	B4DDC6	B4DDC6			54256	28665	25591	4.73445	4.45735	4.40809	1	1	1	1	1	1	1	1	B4DDC6	0.218322	0.0842341	0.115789	0.0430345	0.335439	0.203181	0.19352	0.097977	0.0943265	0.0393232
>Proteimics identification	94	F8WEX5	F8WEX5	SUMF2	Sulfatase-modifying factor 2	1575	4272;4273	F8WEX5;E9PG02;E9PBT8;C9JL30;J3KQJ1;C9J660;F8WA42;Q8NBJ7-2;Q8NBJ7;Q8NBJ7-3	1	1	YES	6.1	6.1	18.584	165	6.9037	0	1	1	>Quantification	F8WEX5	F8WEX5			12286	5662.6	6623.5	4.08941	3.75302	3.82109	1	1	1	1	1	1	1	1	F8WEX5	0.0746764	0.291444	0.193996	0.104255	0.131981	0.203647	0.0994304	0.321365	0.169348	0.112566
>Proteimics identification	148	H0YEP5	H0YEP5	SMPD1	Sphingomyelin phosphodiesterase (Fragment)	162	499	H0YEP5;G3V1E1;E9PQT3;P17405-3;P17405-2;P17405-4;P17405	1	1	YES	3.8	3.8	36.132	317	7.7781	0	1	0	>Quantification	H0YEP5			H0YEP5	30928	30928	0	4.49035	4.49035	#NUM!	1	1	1	1	0	0	0	0	H0YEP5	0.147448	0.133939	0.178713	0.0962854	0.195601	0.248014
>Proteimics identification	59	A0A1B0GVD5	A0A1B0GVD5	CTSD	Cathepsin D	52;172;321;934;1096;1177;1191;1394;1409;1671;1819;1951	131;132;133;134;135;136;137;138;139;140;2543;2544;2545;2546;2547;2548;2549;2550;2551;2552;2553;2554;2555;2556;2557;2558;2559;2936;2937;2938;3206;3207;3233;3234;3235;3236;3776;3777;3778;3779;3816;4472;4473;4474;4908;4909;4910;4911;516;517;518;519;5214;5215;900;901	A0A1B0GVD5;A0A1B0GWE8;A0A1B0GU92;A0A1B0GU03;P07339	12	12	NO	40.8	40.8	44.237	409	129.65	0	11	12	>Quantification	A0A1B0GVD5	A0A1B0GVD5			2997400	1476100	1521300	6.47674	6.16912	6.18221	29	29	28	23	27	27	24	19	A0A1B0GVD5	0.163645	0.16071	0.150049	0.231365	0.115793	0.160314	0.200194	0.152014	0.175977	0.161552
>Proteimics identification	194	H9KV75	H9KV75	ACTN1	Alpha-actinin-1	1016;1750;1763	2761;2762;4685;4686;4707;4708	H9KV75;P12814-2;P12814;P12814-3;P12814-4	3	3	NO	5.7	5.7	94.825	822	23.031	0	3	3	>Quantification	H9KV75	H9KV75			18433	9142.5	9290.9	4.2656	3.96106	3.96806	3	3	2	2	3	3	2	2	H9KV75	0.235645	0.092571	0.114596	0.192306	0.174222	0.190659	0.225113	0.0947217	0.111763	0.204843
>Proteimics identification	17	A0A087WYV6	A0A087WYV6	TSPAN6	Tetraspanin-6	375	1063;1064	A0A087WYV6;A0A087WZU5;O43657	1	1	YES	8.5	8.5	14.958	129	8.5045	0	1	1	>Quantification	A0A087WYV6	A0A087WYV6			260660	140900	119760	5.41607	5.14891	5.07831	1	1	1	1	1	1	1	1	A0A087WYV6	0.180892	0.0597086	0.186906	0.0345901	0.250503	0.2874	0.178471	0.0520264	0.166786	0.0347457
>Proteimics identification	510	Q9H3Z4-2	Q9H3Z4	DNAJC5	Isoform 2 of DnaJ homolog subfamily C member 5	444	1217	Q9H3Z4-2;Q9H3Z4	1	1	YES	8.4	8.4	18.801	167	6.4656	0.0060852	1	0	>Quantification	Q9H3Z4-2			Q9H3Z4-2	106410	106410	0	5.02698	5.02698	#NUM!	1	1	1	1	0	0	0	0	Q9H3Z4-2	0.179501	0.0811982	0.185116	0.0690843	0.233707	0.251394
>Proteimics identification	19	A0A087X0D5	A0A087X0D5	CTSH	Pro-cathepsin H	1292;1301	3508;3509;3510;3528;3529	A0A087X0D5;P09668	2	2	NO	13.3	13.3	36.269	323	21.12	0	2	2	>Quantification	A0A087X0D5		A0A087X0D5	A0A087X0D5	55934	29753	26181	4.74768	4.47353	4.41799	3	3	1	1	2	2	2	2	A0A087X0D5	0	0.295173	0	0	0.704827	0	0	5.51e-07	0	0
>Proteimics identification	435	P78371-2	P78371	CCT2	Isoform 2 of T-complex protein 1 subunit beta	1415;1811	3829;3830;3831;4882	P78371-2;P78371	2	2	NO	7.6	7.6	52.717	488	15.34	0	1	2	>Quantification	P78371-2				11033	2638.3	8395.2	4.04269	3.42132	3.92403	1	1	1	1	3	3	3	3	P78371-2	0.220096	0	0.16806	0	0.42259	0.189254	0.103674	0.173464	0.122908	0.0255305
>Proteimics identification	95	C9J9B4	C9J9B4	ADAM10	Disintegrin and metalloproteinase domain-containing protein 10 (Fragment)	355	985	C9J9B4;O14672	1	1	YES	8	8	14.531	125	6.5377	0.0041068	1	0	>Quantification	C9J9B4			C9J9B4	22818	22818	0	4.35828	4.35828	#NUM!	1	1	1	1	0	0	0	0	C9J9B4	0.147365	0.146891	0.2282	0.172749	0.157637	0.147158
>Proteimics identification	72	E9PM31	E9PM31	CD81	CD81 antigen (Fragment)	1367	3689	E9PM31;H0YEE2;E9PJK1;E9PRJ8;H0YDL9;H0YDJ9;E9PIF1;A6NMH8;P60033	1	1	YES	21.7	21.7	10.027	92	9.9182	0	1	0	>Quantification	E9PM31			E9PM31	508960	508960	0	5.70668	5.70668	#NUM!	1	1	1	1	0	0	0	0	E9PM31	0.193192	0.0887848	0.163102	0.0631942	0.258017	0.23371
>Proteimics identification	262	P02787	P02787	TF	Serotransferrin	29;220;258;335;402;403;404;546;860;984;1086;1246;1285;1449;1453;1524;1573;1596;1928	1123;1124;1125;1126;1127;1128;1532;1533;1534;1535;2384;2385;2664;2915;2916;3420;3496;3497;3937;3938;3939;3945;3946;4142;4143;4144;4266;4267;4268;4324;4325;4326;4327;5146;5147;640;641;67;68;713;714;939	P02787	19	19	NO	32.2	32.2	77.063	698	251.14	0	15	19	>Quantification	P02787	P02787			1266700	722060	544590	6.10267	5.85857	5.73607	20	20	18	15	22	22	22	18	P02787	0.267104	0.0605182	0.185967	0.104412	0.18753	0.194469	0.252309	0.0600048	0.184342	0.101261
>Proteimics identification	225	O43286	O43286	B4GALT5	Beta-1,4-galactosyltransferase 5	1724	4627;4628	O43286	1	1	YES	2.1	2.1	45.118	388	6.3776	0.006	1	1	>Quantification	O43286	O43286			263840	135980	127850	5.42134	5.13348	5.1067	1	1	1	1	1	1	1	1	O43286	0.19257	0.12216	0.216133	0.138747	0.21082	0.119569	0.180054	0.124325	0.238427	0.147498
>Proteimics identification	212	O00115-2	O00115	DNASE2	Isoform 2 of Deoxyribonuclease-2-alpha	691	1899	O00115-2;O00115	1	1	YES	4.6	4.6	33.615	305	6.2629	0.0096525	1	0	>Quantification	O00115-2			O00115-2	22170	22170	0	4.34577	4.34577	#NUM!	1	1	1	1	0	0	0	0	O00115-2	0.0884779	0.1203	0.233519	0.0789129	0.189866	0.288924
>Proteimics identification	176	H0YKK6	H0YKK6	PSME1	Proteasome activator complex subunit 1	1251	3429;3430	H0YKK6;Q06323	1	1	YES	13.3	13.3	10.576	90	6.6838	0.0021097	1	1	>Quantification	H0YKK6				52435	26225	26210	4.71962	4.41872	4.41847	1	1	1	1	1	1	1	1	H0YKK6	0.227307	0.144833	0.21659	0.0486877	0.362583	0	0.229005	0.0436486	0.247997	0.0694802
>Proteimics identification	131	E9PC41	E9PC41	IL1RL1	Interleukin-1 receptor-like 1	248;600	1652;1653;691;692	E9PC41;Q01638-2;Q01638	2	2	NO	11.8	11.8	35.597	314	19.313	0	2	2	>Quantification	E9PC41	E9PC41			43005	16981	26024	4.63352	4.22996	4.41537	2	2	1	1	2	2	2	2	E9PC41	0.226089	0.0882228	0.137988	0.105912	0.276205	0.165583	0.234747	0.0999638	0.176955	0.101519
>Proteimics identification	421	P58499-3	P58499	FAM3B	Isoform C of Protein FAM3B	586;717;1239;1248;1516;1556;1948	1621;1622;1623;1970;3408;3422;3423;4129;4231;4232;5201;5202;5203;5204	P58499-3	7	7	NO	41.2	41.2	20.814	187	43.364	0	7	4	>Quantification	P58499-3	P58499-3			1317900	829130	488770	6.11988	5.91862	5.6891	9	9	9	7	5	5	5	4	P58499-3	0.149623	0.146719	0.182055	0.190878	0.129595	0.20113	0.139398	0.151641	0.208712	0.120801
>Proteimics identification	81	M0R1V7	M0R1V7	UBA52	Ubiquitin-60S ribosomal protein L40 (Fragment)	1649;1665	4424;4425;4426;4427;4457;4458	M0R1V7;J3QS39;Q49A90;J3QTR3;F5H6Q2;F5GYU3;F5H2Z3;F5H265;B4DV12;F5H388;F5H747;F5GXK7;J3QKN0;Q5PY61;Q96C32;P62987;P62979;P0CG47;P0CG48	2	2	NO	39.7	39.7	7.1321	63	92.708	0	2	2	>Quantification	M0R1V7	M0R1V7			2608000	1290500	1317600	6.41631	6.11076	6.11978	3	3	3	3	3	3	3	3	M0R1V7	0.224746	0.0677573	0.175283	0.0704887	0.224717	0.237008	0.231754	0.0744336	0.174938	0.0691003
>Proteimics identification	538	Q9Y5X9	Q9Y5X9	LIPG	Endothelial lipase	981;1176	2659;2660;3204;3205	Q9Y5X9	2	2	NO	7	7	56.794	500	27.269	0	2	2	>Quantification	Q9Y5X9	Q9Y5X9			127300	65927	61372	5.10483	4.81906	4.78797	2	2	2	2	2	2	2	2	Q9Y5X9	0.122154	0.124437	0.232681	0.172656	0.185187	0.162885	0.05346	0.148879	0.275781	0.177075
>Proteimics identification	12	A0A087WY45	A0A087WY45	ELSPBP1	Epididymal sperm-binding protein 1	159;195;540	1521;494;580;581	A0A087WY45;Q96BH3	3	3	NO	13.2	13.2	25.636	220	19.182	0	3	1	>Quantification	A0A087WY45	A0A087WY45			572120	401920	170200	5.75749	5.60414	5.23096	3	3	3	3	1	1	1	1	A0A087WY45	0.285803	0.123957	0.115465	0.138108	0.0888999	0.247767	0.276043	0.126886	0.131156	0.112698
>Proteimics identification	265	P03973	P03973	SLPI	Antileukoproteinase	180;203;982;1923	2661;2662;5137;5138;544;545;602	P03973	4	4	NO	27.3	27.3	14.326	132	24.538	0	3	4	>Quantification	P03973	P03973			11201000	2809200	8391900	7.04926	6.44858	6.92386	3	3	3	3	4	4	4	4	P03973	0.172246	0.15054	0.199878	0.173432	0.160159	0.143745	0.133533	0.132875	0.236114	0.167495
>Proteimics identification	80	C9JEN3	C9JEN3	TMBIM1	Protein lifeguard 3 (Fragment)	151	426;427	C9JEN3;C9IYT2;F8WDY4;C9IZ27;C9JW19;C9JWV9;B4DUD2;Q969X1	1	1	YES	13.2	13.2	11.535	106	7.6643	0	1	1	>Quantification	C9JEN3	C9JEN3			453880	265240	188640	5.65694	5.42364	5.27563	1	1	1	1	1	1	1	1	C9JEN3	0.154994	0.0766581	0.210103	0.047813	0.280389	0.230043	0.210839	0.0724029	0.19819	0.0480255
>Proteimics identification	140	E9PLJ3	E9PLJ3	CFL1	Cofilin-1 (Fragment)	147;1896	378;5083;5084	E9PLJ3;E9PQB7;G3V1A4;E9PP50;E9PK25;P23528	2	2	NO	27.8	27.8	9.0904	79	12.702	0	2	1	>Quantification	E9PLJ3	E9PLJ3			446960	365060	81899	5.65027	5.56236	4.91328	2	2	2	2	1	1	1	1	E9PLJ3	0.231554	0.11784	0.186832	0.102065	0.213341	0.148367	0.323244	0.169361	0.226275	0.138614
>Proteimics identification	111	D6RF35	D6RF35	GC	Vitamin D-binding protein	840;1639	2310;4404;4405	D6RF35;P02774-2;P02774;P02774-3	2	2	NO	6.7	6.7	53.02	476	48.899	0	2	1	>Quantification	D6RF35	D6RF35			57774	40802	16972	4.76173	4.61068	4.22973	2	2	2	2	1	1	1	1	D6RF35	0.171954	0.107432	0.197783	0.102765	0.195476	0.22459	0.184305	0.0925098	0.161757	0.120925
>Proteimics identification	440	Q01459	Q01459	CTBS	Di-N-acetylchitobiase	128;669;819;1398;1583	1814;2233;2234;316;3786;3787;4293;4294	Q01459	5	5	NO	16.6	16.6	43.759	385	35.464	0	4	4	>Quantification	Q01459	Q01459			640210	372590	267630	5.80632	5.57123	5.42753	4	4	4	4	4	4	4	4	Q01459	0.20882	0.0788144	0.192959	0.0699263	0.202694	0.246786	0.190258	0.0855086	0.154716	0.0813105
>Proteimics identification	42	A0A0C4DFS8	A0A0C4DFS8	NAMPT	Nicotinamide phosphoribosyltransferase	1776;1903	4738;5096	A0A0C4DFS8;P43490	2	2	NO	6	6	41.864	368	12.311	0	1	1	>Quantification	A0A0C4DFS8				16978	13015	3963.3	4.22989	4.11444	3.59806	1	1	1	1	1	1	1	1	A0A0C4DFS8	0.2185	0.0820071	0.15591	0.0684368	0.228287	0.246859	0.238903	0.0325392	0.183739	0
>Proteimics identification	517	Q9NZ08	Q9NZ08	ERAP1	Endoplasmic reticulum aminopeptidase 1	1162;1681	3158;4494;4495	Q9NZ08;Q9NZ08-2	2	2	NO	2.4	2.4	107.23	941	12.333	0	1	2	>Quantification	Q9NZ08	Q9NZ08			5915.1	2597.9	3317.2	3.77196	3.41462	3.52077	1	1	1	1	2	2	2	2	Q9NZ08	0.12185	0.0931736	0.243923	0.107211	0.169191	0.264651	0.154046	0.0969772	0.244259	0.104506
>Proteimics identification	431	P62873-2	P62873	GNB1	Isoform 2 of Guanine nucleotide-binding protein G(I)/G(S)/G(T) subunit beta-1	1080;1105	2906;2949	P62873-2;P62873	2	1	YES	8.7	5.4	36.297	332	19.26	0	1	0	>Quantification	P62873-2			P62873-2	10200	10200	0	4.0086	4.0086	#NUM!	2	1	1	1	0	0	0	0	P62873-2	0.345421	0	0.00233346	0	0	0.652246
>Proteimics identification	508	Q9GZX9	Q9GZX9	TWSG1	Twisted gastrulation protein homolog 1	70;1865	178;179;5025	Q9GZX9	2	2	NO	13	13	25.017	223	36.589	0	1	2	>Quantification	Q9GZX9	Q9GZX9			414240	204720	209520	5.61725	5.31116	5.32123	1	1	1	1	2	2	2	2	Q9GZX9	0.138073	0.147636	0.245961	0.0834124	0.211016	0.173902	0.120626	0.161494	0.266404	0.0957347
>Proteimics identification	2	C9JCK5	C9JCK5	PSMA2	Proteasome endopeptidase complex	1015;1939	2760;5175;5176;5177;5178	C9JCK5;A0A024RA52;P25787	2	2	NO	24.4	24.4	18.607	164	18.243	0	1	2	>Quantification	C9JCK5	C9JCK5			182450	81453	100990	5.26114	4.91091	5.00428	2	2	1	1	3	3	2	2	C9JCK5	0.218804	0.060083	0.177887	0.0760195	0.228656	0.238551	0.256897	0.103503	0.162742	0.126618
>Proteimics identification	168	H0YJN9	H0YJN9	LGMN	Legumain (Fragment)	380	1080;1081	H0YJN9;G3V2T4;G3V4E4;Q99538-3;Q99538-2;Q99538	1	1	YES	18.7	18.7	9.658	91	8.6933	0	1	1	>Quantification	H0YJN9				450760	235730	215040	5.65395	5.37241	5.33252	1	1	1	1	1	1	1	1	H0YJN9	0	0.169047	0.267354	0.0472069	0.235906	0.280486	0.197622	0.108821	0.140033	0.0676904
>Proteimics identification	472	Q6UWU2	Q6UWU2	GLB1L	Beta-galactosidase-1-like protein	1686;1883	4518;5054	Q6UWU2	2	2	NO	3.7	3.7	74.157	654	12.18	0	1	1	>Quantification	Q6UWU2				3073.3	846.54	2226.7	3.4876	2.92765	3.34766	1	1	1	1	1	1	1	1	Q6UWU2	0	0.196665	0.408665	0	0.39467	0	0	0.134075	0.367178	0.0832787
>Proteimics identification	76	B3KQV6	B3KQV6	PPP2R1A	Serine/threonine-protein phosphatase 2A 65 kDa regulatory subunit A alpha isoform	1127;1906	2993;5102	B3KQV6;P30153	2	2	NO	7.3	7.3	45.604	410	21.047	0	1	1	>Quantification	B3KQV6		B3KQV6	B3KQV6	16011	7923.9	8086.7	4.20442	3.89894	3.90777	1	1	1	1	1	1	1	1	B3KQV6	0.352895	0	0.00196749	0	0.645138	0	0	3.4e-07	0	0
>Proteimics identification	206	K7ENC0	K7ENC0	FUT5	Alpha-(1,3)-fucosyltransferase 5	1249	3424;3425	K7ENC0;P51993;P21217;P51993-2;Q11128	1	1	YES	4.3	4.3	42.989	374	7.2162	0	1	1	>Quantification	K7ENC0				27258	13271	13987	4.43549	4.1229	4.14572	1	1	1	1	1	1	1	1	K7ENC0	0.198818	0.126344	0.147107	0.090792	0.218354	0.218584	0	0.165078	0.271016	0.257379
>Proteimics identification	190	H7BZJ3	H7BZJ3	PDIA3	Protein disulfide-isomerase A3 (Fragment)	1466	3982;3983	H7BZJ3	1	1	YES	11.4	11.4	13.519	123	6.9195	0	1	1	>Quantification	H7BZJ3	H7BZJ3			58583	27821	30763	4.76777	4.44437	4.48803	1	1	1	1	1	1	1	1	H7BZJ3	0.166416	0.14289	0.219381	0.0790946	0.158701	0.233517	0.136808	0.0717465	0.218593	0.0880448
>Proteimics identification	407	P50995-2	P50995	ANXA11	Isoform 2 of Annexin A11	679;796;1680	1873;2192;2193;2194;4491;4492;4493	P50995-2;P50995	3	3	NO	9.1	9.1	51.242	472	22.822	0	2	3	>Quantification	P50995-2	P50995-2			87594	47352	40242	4.94247	4.67534	4.60468	4	4	4	4	3	3	3	3	P50995-2	0.285395	0.0454621	0.219387	0.0482386	0.190811	0.210707	0.24419	0.0742258	0.226531	0.0788476
>Proteimics identification	385	P36871-3	P36871	PGM1	Isoform 3 of Phosphoglucomutase-1	1494	4073;4074	P36871-3;P36871;P36871-2	1	1	YES	2.5	2.5	40.282	365	6.5065	0.0061224	1	1	>Quantification	P36871-3	P36871-3			21569	12577	8991.6	4.33383	4.09958	3.95384	1	1	1	1	1	1	1	1	P36871-3	0.154177	0.0480765	0.249101	0.056359	0.247707	0.24458	0.155302	0.0501167	0.271161	0.0512366
>Proteimics identification	397	P45877	P45877	PPIC	Peptidyl-prolyl cis-trans isomerase C	952;1678;1703	2599;2600;4487;4488;4559;4560	P45877	3	3	NO	14.6	14.6	22.763	212	20.916	0	3	3	>Quantification	P45877	P45877			411970	215230	196740	5.61487	5.3329	5.29389	3	3	3	3	3	3	3	3	P45877	0.122717	0.226153	0.178558	0.269819	0.120022	0.082731	0.105899	0.264429	0.12356	0.33652
>Proteimics identification	10	A0A087WVV1	A0A087WVV1	PSMB2	Proteasome subunit beta type-2	584	1617;1618	A0A087WVV1;P49721	1	1	YES	13.1	13.1	9.557	84	17.018	0	1	1	>Quantification	A0A087WVV1	A0A087WVV1			145220	71329	73896	5.16203	4.85327	4.86862	1	1	1	1	1	1	1	1	A0A087WVV1	0.19144	0.0426674	0.21852	0.0477268	0.242523	0.257123	0.195847	0.0437245	0.216279	0.0566773
>Proteimics identification	424	P60953	P60953	CDC42	Cell division control protein 42 homolog	1320;1377;1676;1962	3575;3576;3577;3578;3579;3580;3581;3743;4482;4483;4484;5242;5243;5244	P60953	4	4	NO	26.7	26.7	21.258	191	36.417	0	4	3	>Quantification	P60953	P60953			607720	379390	228330	5.7837	5.57909	5.35856	8	8	5	4	6	6	4	4	P60953	0.283373	0.0610008	0.124677	0.155885	0.191177	0.183886	0.304147	0.0309265	0.125934	0.0576395
>Proteimics identification	311	P11216	P11216	PYGB	Glycogen phosphorylase, brain form	1148;1795;1872	3051;3052;3053;4807;5034;5035	P11216	3	3	NO	5.2	5.2	96.695	843	20.155	0	3	2	>Quantification	P11216	P11216			8841.3	5560.3	3281	3.94652	3.7451	3.51601	4	4	4	4	2	2	1	1	P11216	0.16347	0.191041	0.112861	0.0458077	0.231801	0.25502	0.117358	0.105092	0.21848	0.101915
>Proteimics identification	449	Q075Z2	Q075Z2	BSPH1	Binder of sperm protein homolog 1	542	1525	Q075Z2	1	1	YES	12.9	12.9	15.693	132	7.1703	0	1	0	>Quantification	Q075Z2			Q075Z2	15482	15482	0	4.18983	4.18983	#NUM!	1	1	1	1	0	0	0	0	Q075Z2	0.207677	0.0937253	0.160297	0.100535	0.132889	0.304877
>Proteimics identification	172	H0Y3J4	H0Y3J4	SMOC2	SPARC-related modular calcium-binding protein 2 (Fragment)	1504	4100;4101	H0Y3J4;H0Y5I1;Q9H3U7;Q9H3U7-2	1	1	YES	22.4	22.4	7.7962	67	6.5126	0.006135	1	1	>Quantification	H0Y3J4	H0Y3J4			115480	47704	67772	5.06251	4.67855	4.83105	1	1	1	1	1	1	1	1	H0Y3J4	0.181362	0.0628409	0.215261	0.0593726	0.2465	0.234663	0.109618	0.0802194	0.227966	0.0599515
>Proteimics identification	536	Q9Y2H8	Q9Y2H8	ZNF510	Zinc finger protein 510	1442	3922	Q9Y2H8	1	1	YES	1.2	1.2	79.141	683	-2	1	1	0	>Quantification	Q9Y2H8			Q9Y2H8	47394	47394	0	4.67572	4.67572	#NUM!	1	1	1	1	0	0	0	0	Q9Y2H8	0.181088	0.179382	0.167012	0.257852	0.0860504	0.128616
>Proteimics identification	322	P13716	P13716	ALAD	Delta-aminolevulinic acid dehydratase	1009	2745;2746	P13716;P13716-2	1	1	YES	3	3	36.294	330	7.2739	0	1	1	>Quantification	P13716	P13716			18260	8198.3	10061	4.2615	3.91372	4.00264	1	1	1	1	1	1	1	1	P13716	0.273354	0.102899	0.161262	0.205088	0.205027	0.0523701	0.255447	0.103498	0.162841	0.191788
>Proteimics identification	493	Q96BT7-4	Q96BT7	ALKBH8	Isoform 4 of Alkylated DNA repair protein alkB homolog 8	1229	3336;3337	Q96BT7-4	1	1	YES	1.9	1.9	75.557	667	-2	1	1	0	>Quantification	Q96BT7-4			Q96BT7-4	7655.6	7655.6	0	3.88398	3.88398	#NUM!	2	2	2	2	0	0	0	0	Q96BT7-4	0.0829112	0.315416	0.00409664	0.520561	0.0444134	0.0326016
>Proteimics identification	189	H7BZI1	H7BZI1	NUCB1	Nucleobindin-1 (Fragment)	526;1143;1210;1934	1481;1482;3041;3042;3283;3284;3285;3286;3287;3288;5164;5165	H7BZI1;Q02818	4	4	NO	17.6	17.6	34.773	295	47.116	0	4	4	>Quantification	H7BZI1	H7BZI1			381290	190730	190550	5.58126	5.28042	5.28001	6	6	6	5	6	6	6	6	H7BZI1	0.106553	0.213797	0.19259	0.245836	0.114143	0.116121	0.111884	0.27942	0.108845	0.280852
>Proteimics identification	335	P16278-3	P16278	GLB1	Isoform 3 of Beta-galactosidase	171;1523;1552;1613	4139;4140;4141;4225;4358;4359;515	P16278-3;P16278	4	4	NO	8	8	72.75	647	26.864	0	3	3	>Quantification	P16278-3	P16278-3			96474	33293	63182	4.98441	4.52235	4.80059	3	3	3	3	4	4	4	4	P16278-3	0.162436	0.100001	0.254292	0.0984729	0.171897	0.212901	0.167635	0.121338	0.27105	0.129546
>Proteimics identification	164	G3V3U4	G3V3U4	PSMA6	Proteasome subunit alpha type	1224	3324;3325	G3V3U4;G3V3I1;G3V295;G3V5Z7;P60900	1	1	YES	8.4	8.4	11.57	107	6.3238	0.005848	1	1	>Quantification	G3V3U4	G3V3U4			108010	51960	56045	5.03346	4.71567	4.74854	1	1	1	1	1	1	1	1	G3V3U4	0.207248	0.0524066	0.198489	0.0560633	0.218649	0.267145	0.20632	0.0556738	0.198622	0.0570046
>Proteimics identification	361	P25791	P25791	LMO2	Rhombotin-2	929	2534	P25791;P25791-3	1	1	YES	7	7	18.358	158	-2	1	1	0	>Quantification	P25791			P25791	1463700	1463700	0	6.16545	6.16545	#NUM!	1	1	1	1	0	0	0	0	P25791	0.0988471	0.336387	0.11485	0.258404	0.153228	0.0382839
>Proteimics identification	250	P01034	P01034	CST3	Cystatin-C	37;73;986;1194;1195;1375;1421;1683	100;185;186;187;2679;2680;2681;2682;3239;3240;3241;3242;3243;3244;3245;3738;3739;3740;3741;3858;3859;4510;4511;4512;4513;4514;80;81;82;83;84;85;86;87;88;89;90;91;92;93;94;95;96;97;98;99	P01034	8	8	NO	56.2	56.2	15.799	146	125.05	0	8	8	>Quantification	P01034	P01034			11071000	4924300	6146800	7.04419	6.69234	6.78865	21	21	16	12	25	25	21	16	P01034	0.135511	0.13584	0.220593	0.121842	0.185766	0.19892	0.130221	0.210871	0.184743	0.123599
>Proteimics identification	339	P17174-2	P17174	GOT1	Isoform 2 of Aspartate aminotransferase, cytoplasmic	948	2589;2590	P17174-2;P17174	1	1	YES	5.1	5.1	44.147	392	16.816	0	1	1	>Quantification	P17174-2	P17174-2			35072	16976	18096	4.54496	4.22984	4.25758	1	1	1	1	1	1	1	1	P17174-2	0.215401	0.0580202	0.263837	0.0691842	0.231665	0.161893	0.185747	0.0873376	0.240626	0.066463
>Proteimics identification	232	O75629	O75629	CREG1	Protein CREG1	637	1755;1756	O75629	1	1	YES	9.5	9.5	24.074	220	17.122	0	1	1	>Quantification	O75629	O75629			49105	24538	24567	4.69113	4.38984	4.39035	1	1	1	1	1	1	1	1	O75629	0.213887	0.101856	0.208123	0.0883372	0.218138	0.16966	0.281925	0.0584575	0.193544	0.125708
>Proteimics identification	445	Q03167-2	Q03167	TGFBR3	Isoform 2 of Transforming growth factor beta receptor type 3	1266	3458;3459	Q03167-2;Q03167	1	1	YES	1.8	1.8	93.427	850	7.3078	0	1	1	>Quantification	Q03167-2				8294.7	4305.2	3989.5	3.9188	3.63399	3.60092	1	1	1	1	1	1	1	1	Q03167-2	0	0.119227	0.453994	0.122852	0.303928	0	0	0.158354	0.625775	0.215032
>Proteimics identification	436	X6R8F3	X6R8F3	LCN2	Neutrophil gelatinase-associated lipocalin	1630;1887	4390;5061;5062;5063;5064	X6R8F3;P80188-2;P80188	2	2	NO	15	15	22.788	200	15.611	0	1	2	>Quantification	X6R8F3	X6R8F3			164770	55358	109410	5.21688	4.74318	5.03906	2	2	2	2	3	3	3	3	X6R8F3	0.367972	0.0206807	0.0611154	0.15023	0.219026	0.180976	0.314334	0.0501883	0.0621026	0.109794
>Proteimics identification	512	Q9HB40	Q9HB40	SCPEP1	Retinoid-inducible serine carboxypeptidase	422;1276	1167;1168;3474;3475	Q9HB40	2	2	NO	5.8	5.8	50.83	452	14.092	0	2	2	>Quantification	Q9HB40	Q9HB40			73488	31028	42460	4.86622	4.49175	4.62798	2	2	2	2	2	2	2	2	Q9HB40	0.124415	0.0665951	0.336147	0.0661881	0.129221	0.277433	0.128944	0.0750563	0.331011	0.0666161
>Proteimics identification	464	Q16610	Q16610	ECM1	Extracellular matrix protein 1	17;161;178;179;271;319;463;516;539;618;1033;1112;1182;1275;1318;1368	1272;1273;1274;1275;1454;1455;1456;1457;1517;1518;1519;1520;1710;1711;1712;2800;2801;2802;2803;2804;2805;2806;2962;2963;2964;3215;3216;3217;3472;3473;3570;3571;3572;3690;3691;41;42;43;497;498;539;540;541;542;543;803;804;895;896;897;898	Q16610;Q16610-4	16	16	NO	38.9	38.9	60.673	540	154.34	0	14	16	>Quantification	Q16610	Q16610			4880200	2823600	2056600	6.68844	6.4508	6.31315	25	25	21	18	26	26	23	18	Q16610	0.183574	0.111857	0.198388	0.128222	0.186827	0.189647	0.174769	0.157006	0.225547	0.0938582
>Proteimics identification	248	P01024	P01024	C3	Complement C3	1531	4160	P01024	1	1	YES	1	1	187.15	1663	6.4973	0.00611	1	0	>Quantification	P01024			P01024	1269.3	1269.3	0	3.10356	3.10356	#NUM!	1	1	1	1	0	0	0	0	P01024	0.160538	0.0812543	0.230114	0.0794209	0.274229	0.174444
>Proteimics identification	214	O00292-2	O00292	LEFTY2	Isoform 2 of Left-right determination factor 2	38	101;102;103;104	O00292-2;O75610;O00292	1	1	YES	4.8	4.8	37.092	332	19.61	0	1	1	>Quantification	O00292-2	O00292-2			34054	18258	15796	4.53217	4.26145	4.19855	2	2	2	2	2	2	1	1	O00292-2	0.0776306	0.262909	0.109919	0.0187776	0.398845	0.131919	0.183667	0.136447	0.228359	0.0770182
>Proteimics identification	300	P09467	P09467	FBP1	Fructose-1,6-bisphosphatase 1	108;396;779;1668	1110;2150;2151;264;265;4464;4465	P09467	4	4	NO	18	18	36.842	338	50.21	0	3	4	>Quantification	P09467	P09467			122820	51044	71776	5.08927	4.70794	4.85598	3	3	3	3	4	4	4	4	P09467	0.221425	0.0782614	0.178732	0.131882	0.151885	0.237815	0.206675	0.0790711	0.175891	0.136313
>Proteimics identification	479	Q8NDH2	Q8NDH2	CCDC168	Coiled-coil domain-containing protein 168	408;1456	1134;3963	Q8NDH2	2	2	NO	1.4	1.4	277.95	2452	11.741	0	2	0	>Quantification	Q8NDH2			Q8NDH2	81775	81775	0	4.91262	4.91262	#NUM!	2	2	2	2	0	0	0	0	Q8NDH2	0.1447	0.195134	0.142952	0.161162	0.168184	0.187868
>Proteimics identification	483	Q8WXA2	Q8WXA2	PATE1	Prostate and testis expressed protein 1	260;1228;1255	3334;3335;3437;3438;3439;717;718	Q8WXA2	3	3	NO	27	27	14.271	126	25.96	0	3	3	>Quantification	Q8WXA2	Q8WXA2			501260	245160	256090	5.70006	5.38945	5.40839	3	3	3	3	4	4	4	4	Q8WXA2	0.113346	0.20813	0.192386	0.233506	0.0943087	0.158323	0.112622	0.224542	0.203915	0.210127
>Proteimics identification	366	P28066	P28066	PSMA5	Proteasome subunit alpha type-5	411;1060;1329	1139;2862;2863;3595;3596	P28066	3	3	NO	14.9	14.9	26.411	241	22.79	0	3	2	>Quantification	P28066	P28066			115110	64411	50697	5.06111	4.80896	4.70498	3	3	3	3	2	2	2	2	P28066	0.195094	0.0985111	0.220084	0.0646226	0.172879	0.248809	0.17055	0.0931237	0.203934	0.0730178
>Proteimics identification	28	A0A0A0MS51	A0A0A0MS51	GSN	Gelsolin	118	286	A0A0A0MS51;A0A0A0MT01;P06396-2;P06396-4;P06396-3;P06396	1	1	YES	2.9	2.9	82.525	748	13.952	0	1	0	>Quantification	A0A0A0MS51			A0A0A0MS51	5304.8	5304.8	0	3.72467	3.72467	#NUM!	1	1	1	1	0	0	0	0	A0A0A0MS51	0.11265	0.0634981	0.36258	0.0739408	0.153414	0.233917
>Proteimics identification	365	P27797	P27797	CALR	Calreticulin	641	1762;1763	P27797	1	1	YES	3.4	3.4	48.141	417	6.8043	0	1	1	>Quantification	P27797	P27797			31075	14797	16278	4.49241	4.17017	4.2116	1	1	1	1	1	1	1	1	P27797	0.178415	0.099298	0.24637	0.0621026	0.202563	0.211252	0.22632	0.110332	0.253153	0.0625129
>Proteimics identification	132	E9PF91	E9PF91	SPACA3	Sperm acrosome membrane-associated protein 3	306	872;873	E9PF91;Q8IXA5-2;Q8IXA5	1	1	YES	9.8	9.8	12.58	112	12.003	0	1	1	>Quantification	E9PF91	E9PF91			42920	22477	20443	4.63266	4.35174	4.31054	1	1	1	1	1	1	1	1	E9PF91	0.199477	0.0714627	0.203956	0.0567546	0.197139	0.271211	0.201626	0.10998	0.236798	0.0661397
>Proteimics identification	292	P07996-2	P07996	THBS1	Isoform 2 of Thrombospondin-1	634	1749;1750	P07996-2;P07996	1	1	YES	1.1	1.1	120.15	1085	9.3988	0	1	1	>Quantification	P07996-2	P07996-2			10537	5297	5240.3	4.02272	3.72403	3.71936	1	1	1	1	1	1	1	1	P07996-2	0.151547	0.0883546	0.283361	0.0797752	0.249512	0.14745	0.158353	0.0867969	0.280699	0.067536
>Proteimics identification	166	G3V2H3	G3V2H3	PNP	Purine nucleoside phosphorylase (Fragment)	1185	3220	G3V2H3;G3V5M2;P00491	1	1	YES	18.3	18.3	10.472	93	11.663	0	1	0	>Quantification	G3V2H3			G3V2H3	38878	38878	0	4.5897	4.5897	#NUM!	1	1	1	1	0	0	0	0	G3V2H3	6.74e-06	0	0.431637	0	0.568357	0
>Proteimics identification	146	E9PNW4	E9PNW4	CD59	CD59 glycoprotein	477;555;1163	1309;1310;1552;1553;1554;3159	E9PNW4;E9PR17;P13987	3	3	NO	22.2	22.2	11.985	108	56.376	0	3	2	>Quantification	E9PNW4	E9PNW4			3493500	2387700	1105800	6.54326	6.37798	6.04368	4	4	4	4	2	2	2	2	E9PNW4	0.181541	0.108845	0.216537	0.0971419	0.176539	0.219396	0.180498	0.124768	0.198928	0.104693
>Proteimics identification	260	P02763	P02763	ORM1	Alpha-1-acid glycoprotein 1	490;1868;1965	1356;1357;1358;5029;5030;5250;5251;5252;5253	P02763	3	2	NO	18.9	14.4	23.511	201	23.056	0	2	2	>Quantification	P02763	P02763			1118000	647880	470160	6.04844	5.81149	5.67225	5	4	4	4	4	3	3	3	P02763	0.300431	0.0375422	0.142729	0.0720065	0.280612	0.166679	0.33241	0.0571768	0.118774	0.129101
>Proteimics identification	454	Q13438-8	Q13438	OS9	Isoform 8 of Protein OS-9	437;883	1198;1199;2432	Q13438-8;Q13438-6;Q13438-5;Q13438-3;Q13438-2;Q13438-7;Q13438-4;Q13438	2	2	NO	6.1	6.1	60.846	538	12.385	0	2	1	>Quantification	Q13438-8	Q13438-8			51949	26707	25241	4.71558	4.42663	4.40211	2	2	1	1	1	1	1	1	Q13438-8	0.0998062	0.256596	0.163737	0.26742	0.0948549	0.117585	0.172766	0.217049	0.133678	0.224348
>Proteimics identification	522	Q9UBS3	Q9UBS3	DNAJB9	DnaJ homolog subfamily B member 9	1589	4306;4307	Q9UBS3	1	1	YES	4.5	4.5	25.518	223	6.5292	0.0040984	1	1	>Quantification	Q9UBS3	Q9UBS3			56086	28558	27528	4.74885	4.45573	4.43977	1	1	1	1	1	1	1	1	Q9UBS3	0.155275	0.213221	0.144961	0.245141	0.101969	0.139434	0.148975	0.221587	0.138992	0.232114
>Proteimics identification	18	A0A087X054	A0A087X054	HYOU1	Hypoxia up-regulated protein 1	236;523;1751;1788	1473;4687;4760;4761;669;670	A0A087X054;Q9Y4L1	4	4	NO	6.5	6.5	104.78	937	29.82	0	2	4	>Quantification	A0A087X054				25798	7571.4	18227	4.41159	3.87918	4.26072	2	2	1	1	4	4	3	3	A0A087X054	0	0.175168	0.283288	0.112556	0.428988	0	0.116174	0.0870855	0.144939	0.205236
>Proteimics identification	231	O60888-3	O60888	CUTA	Isoform C of Protein CutA	1002;1571;1684	2721;2722;2723;2724;4262;4263;4515;4516	O60888-3;O60888;O60888-2	3	3	NO	37.8	37.8	16.832	156	28.835	0	2	3	>Quantification	O60888-3	O60888-3			499740	143580	356170	5.69874	5.15709	5.55166	3	3	1	1	5	5	3	3	O60888-3	0.17125	0.120806	0.233409	0.0640879	0.345759	0.0646877	0.181349	0.125254	0.217549	0.0725026
>Proteimics identification	201	J3KPA1	J3KPA1	CRISP3	Cysteine-rich secretory protein 3	1902;1978	5094;5095;5282;5283;5284;5285	J3KPA1;P54108;P54108-2;P54108-3	2	2	NO	9.1	9.1	30.975	276	42.593	0	2	2	>Quantification	J3KPA1	J3KPA1			1823700	896760	926920	6.26095	5.95268	5.96704	3	3	3	3	3	3	3	3	J3KPA1	0.236242	0.0897018	0.184113	0.119297	0.255139	0.115508	0.242401	0.0877395	0.205922	0.128296
>Proteimics identification	208	K7ES70	K7ES70	MFAP4	Microfibril-associated glycoprotein 4	24	56;57	K7ES70;P55083;P55083-2	1	1	YES	6.4	6.4	31.326	280	36.077	0	1	1	>Quantification	K7ES70	K7ES70			37934	18892	19041	4.57903	4.27628	4.27969	1	1	1	1	1	1	1	1	K7ES70	0.210769	0.0551042	0.21384	0.0723855	0.160826	0.287076	0.177486	0.06657	0.189578	0.0979144
>Proteimics identification	141	E9PLG2	E9PLG2	PSMC3	26S proteasome regulatory subunit 6A (Fragment)	1405	3800;3801	E9PLG2;E9PMD8;E9PKD5;E9PM69;R4GNH3;P17980	1	1	YES	8.2	8.2	20.487	184	8.7882	0	1	1	>Quantification	E9PLG2	E9PLG2			23812	11284	12528	4.3768	4.05246	4.09788	1	1	1	1	1	1	1	1	E9PLG2	0.283931	0.0592177	0.174291	0.101252	0.217755	0.163554	0.174262	0.0575154	0.28504	0.0695735
>Proteimics identification	504	Q9BUD6	Q9BUD6	SPON2	Spondin-2	955;956	2604;2605;2606;2607;2608;2609;2610;2611	Q9BUD6	2	2	NO	6.9	6.9	35.846	331	21.919	0	2	2	>Quantification	Q9BUD6	Q9BUD6			193320	104090	89226	5.28628	5.01741	4.95049	4	4	2	2	4	4	3	3	Q9BUD6	0.12783	0.0168921	0.331364	0.0261705	0.277129	0.220614	0.153659	0.0266221	0.268433	0.0711491
>Proteimics identification	338	P17066	P17066	HSPA6	Heat shock 70 kDa protein 6	553;887;1118;1697;1747	1549;1550;2439;2440;2441;2442;2976;2977;2978;2979;4540;4541;4678;4679	P17066	5	1	YES	9.2	1.7	71.027	643	7.075	0	1	1	>Quantification	P17066	P17066			103190	59587	43602	5.01364	4.77515	4.63951	7	1	1	1	7	1	1	1	P17066	0.201714	0.11229	0.174354	0.0847408	0.223107	0.203795	0.227993	0.119997	0.1724	0.0775641
>Proteimics identification	218	O00560-3	O00560	SDCBP	Isoform 3 of Syntenin-1	103;344;1492	255;256;257;4068;4069;4070;959;960	O00560-3;O00560	3	3	NO	17.8	17.8	31.761	292	27.794	0	3	3	>Quantification	O00560-3	O00560-3			345670	170920	174750	5.53866	5.23279	5.24242	4	4	3	3	4	4	3	3	O00560-3	0.205778	0.0568083	0.247767	0.0893008	0.126347	0.273999	0.202456	0.0847718	0.139524	0.0861346
>Proteimics identification	392	P41222	P41222	PTGDS	Prostaglandin-H2 D-isomerase	115;1670	279;280;281;4470;4471	P41222	2	2	NO	17.4	17.4	21.029	190	35.044	0	2	2	>Quantification	P41222	P41222			581260	513230	68034	5.76437	5.71031	4.83273	3	3	3	3	2	2	2	2	P41222	0.178208	0.0872463	0.245123	0.0803424	0.12896	0.280121	0.175976	0.0590342	0.278345	0.0798198
>Proteimics identification	320	P13489	P13489	RNH1	Ribonuclease inhibitor	1091;1858	2923;2924;2925;5010;5011	P13489	2	2	NO	7.4	7.4	49.973	461	14.754	0	2	2	>Quantification	P13489				47028	24522	22506	4.67236	4.38956	4.3523	3	3	1	1	2	2	1	1	P13489	0.44661	0	0.00300484	0	0	0.550385	0.398113	0	0.00242411	0
>Proteimics identification	127	E7EQR4	E7EQR4	EZR	Ezrin	65;528;644;852;1055;1541	1486;167;1767;2359;2851;2852;4181;4182	E7EQR4;P15311	6	5	NO	11.9	10.8	69.371	586	39.47	0	2	4	>Quantification	E7EQR4	E7EQR4			62283	25740	36543	4.79437	4.41061	4.5628	3	3	3	3	5	5	4	4	E7EQR4	0.256956	0.0394816	0.220005	0.0639797	0.283169	0.136408	0.125549	0.0494132	0.0990919	0.0440314
>Proteimics identification	121	F8WBR5	F8WBR5	CALM2	Calmodulin-2	385	1089;1090	F8WBR5;M0QZ52;G3V479;P0DP25;P0DP24;P0DP23;E7ETZ0;H0Y7A7;E7EMB3	1	1	YES	26.2	26.2	7.372	65	10.714	0	1	1	>Quantification	F8WBR5	F8WBR5			742090	383910	358190	5.87046	5.58423	5.55411	1	1	1	1	1	1	1	1	F8WBR5	0.282736	0.0560079	0.175899	0.114264	0.172783	0.19831	0.257513	0.0747996	0.161244	0.116267
>Proteimics identification	289	P07858	P07858	CTSB	Cathepsin B	273;330;749;856;1026;1269	2045;2046;2364;2365;2783;2784;3462;806;930;931	P07858	6	6	NO	26	26	37.821	339	53.364	0	5	5	>Quantification	P07858	P07858			809090	488960	320130	5.908	5.68927	5.50533	5	5	5	5	5	5	5	5	P07858	0.162664	0.168271	0.172103	0.146035	0.150735	0.200192	0.152808	0.168464	0.161516	0.153219
>Proteimics identification	286	P07686	P07686	HEXB	Beta-hexosaminidase subunit beta	337;447;773;979;1012;1332;1749;1774;1785;1911;1974	1229;1230;1231;1232;2136;2137;2138;2655;2751;2752;3600;4683;4684;4733;4734;4735;4736;4754;4755;5111;5112;5113;5271;5272;941;942	P07686	11	11	NO	22.7	22.7	63.111	556	106.73	0	11	9	>Quantification	P07686	P07686			1146800	610300	536460	6.05949	5.78554	5.72954	15	15	15	14	11	11	11	9	P07686	0.185182	0.0925902	0.216357	0.0911098	0.174377	0.234392	0.193371	0.0926502	0.215046	0.099004
>Proteimics identification	481	Q8WUM4	Q8WUM4	PDCD6IP	Programmed cell death 6-interacting protein	602;643;774;1011;1094;1273;1277;1563;1572;1971	1663;1664;1766;2139;2140;2749;2750;2933;2934;3468;3469;3476;3477;3478;4246;4264;4265;5264;5265	Q8WUM4;Q8WUM4-2	10	10	NO	15.7	15.7	96.022	868	108.49	0	10	8	>Quantification	Q8WUM4	Q8WUM4			207320	99297	108020	5.31664	4.99694	5.0335	10	10	10	9	9	9	9	7	Q8WUM4	0.301722	0.0669844	0.124053	0.0591683	0.182688	0.265384	0.17336	0.0953669	0.107736	0.0642602
>Proteimics identification	226	O43581	O43581	SYT7	Synaptotagmin-7	1257;1286	3442;3498	O43581;O43581-6;O43581-2;O43581-5;O43581-4;O43581-3	2	2	NO	7.9	7.9	45.501	403	13.369	0	1	1	>Quantification	O43581	O43581			24621	14480	10142	4.39131	4.16077	4.00612	1	1	1	1	1	1	1	1	O43581	0.176351	0.102456	0.233214	0.0705133	0.23344	0.184026	0.127255	0.0654816	0.147291	0.0536516
>Proteimics identification	492	Q96BQ1	Q96BQ1	FAM3D	Protein FAM3D	347	966;967	Q96BQ1	1	1	YES	4	4	24.963	224	6.5568	0.0041494	1	1	>Quantification	Q96BQ1	Q96BQ1			48425	25033	23392	4.68507	4.39851	4.36907	1	1	1	1	1	1	1	1	Q96BQ1	0.18421	0.148902	0.17306	0.191225	0.10357	0.199033	0.182917	0.152549	0.167795	0.188585
>Proteimics identification	340	P17900	P17900	GM2A	Ganglioside GM2 activator	514;865;1473	1450;1451;2394;2395;3997;3998;3999;4000	P17900	3	3	NO	19.7	19.7	20.838	193	35.7	0	3	3	>Quantification	P17900	P17900			741970	386690	355280	5.87039	5.58736	5.55057	4	4	4	4	4	4	4	4	P17900	0.281606	0.127559	0.0993689	0.0949218	0.174943	0.221601	0.142761	0.262727	0.0951365	0.105785
>Proteimics identification	205	K7EP45	K7EP45	VPS25	Vacuolar protein-sorting-associated protein 25	610	1685;1686	K7EP45;K7EKV4;Q9BRG1	1	1	YES	14.1	14.1	11.57	99	6.3491	0.0059172	1	1	>Quantification	K7EP45			K7EP45	26832	13599	13233	4.42865	4.13351	4.12166	1	1	1	1	1	1	0	0	K7EP45	0.210248	0	0.268871	0.186444	0	0.334437
>Proteimics identification	290	P07900	P07900	HSP90AA1	Heat shock protein HSP 90-alpha	28;334;803;817;824;1667;1904;1914	2204;2205;2230;2231;2246;4463;5097;5119;5120;5121;65;66;937;938	P07900;P07900-2	8	4	NO	13.4	7.4	84.659	732	113.88	0	4	2	>Quantification	P07900	P07900			97451	71668	25783	4.98879	4.85533	4.41133	8	4	4	4	6	2	2	2	P07900	0.188245	0.103414	0.212663	0.103273	0.192946	0.199458	0.176402	0.0820401	0.244806	0.0824468
>Proteimics identification	8	A0A087WUL2	A0A087WUL2	PSMB3	Proteasome subunit beta type-3 (Fragment)	576;1222	1603;1604;3320;3321	A0A087WUL2;P49720	2	2	NO	23.4	23.4	16.161	145	22.95	0	2	2	>Quantification	A0A087WUL2	A0A087WUL2			149150	67903	81243	5.17362	4.83189	4.90979	2	2	2	2	2	2	2	2	A0A087WUL2	0.190841	0.0572675	0.259276	0.0736127	0.165078	0.253925	0.0774005	0.0945709	0.239825	0.0757044
>Proteimics identification	401	P48745	P48745	NOV	Protein NOV homolog	54;146;997	146;2713;374;375;376;377	P48745	3	3	NO	9	9	39.162	357	19.296	0	2	2	>Quantification	P48745	P48745			191150	87329	103820	5.28137	4.94116	5.01628	3	3	3	3	3	3	3	3	P48745	0.17583	0.0879951	0.231396	0.091253	0.197375	0.21615	0.187182	0.0920519	0.199078	0.111869
>Proteimics identification	428	P61981	P61981	YWHAG	14-3-3 protein gamma	1283;1591	3492;3493;4312;4313	P61981	2	1	YES	10.9	7.7	28.302	247	22.509	0	1	1	>Quantification	P61981				22203	12271	9931.5	4.34641	4.08888	3.99701	2	1	1	1	2	1	1	1	P61981	0.19466	0.115064	0.200833	0	0.223484	0.265958	0.193642	0.0475363	0.147649	0.0716723
>Proteimics identification	282	P07237	P07237	P4HB	Protein disulfide-isomerase	383;897;1362	1085;1086;2462;2463;3681	P07237	3	3	NO	8.5	8.5	57.116	508	22.863	0	3	2	>Quantification	P07237	P07237			57536	29965	27570	4.75994	4.47661	4.44044	3	3	2	2	2	2	2	2	P07237	0.154778	0.13222	0.210713	0.13005	0.179002	0.193238	0.164469	0.148233	0.222371	0.144179
>Proteimics identification	418	P55259-3	P55259	GP2	Isoform Alpha of Pancreatic secretory granule membrane major glycoprotein GP2	204;1254;1315;1899	3436;3561;3562;3563;3564;5088;603;604;605	P55259-3	4	4	NO	10.3	10.3	59.127	534	41.654	0	3	3	>Quantification	P55259-3	P55259-3			188530	103110	85426	5.27538	5.0133	4.93159	5	5	4	4	4	4	3	3	P55259-3	0.28158	0.10872	0.114723	0.0480123	0.218417	0.228547	0.260579	0.116648	0.076897	0.0778688
>Proteimics identification	157	F5H5D3	F5H5D3	TUBA1C	Tubulin alpha chain	143;548;880;1083;1386;1645;1648	1540;1541;2420;2421;2909;366;367;368;369;3762;3763;4414;4415;4421;4422;4423	F5H5D3;Q9BQE3	7	7	NO	21.4	21.4	57.73	519	52.941	0	6	7	>Quantification	F5H5D3	F5H5D3			376780	184880	191910	5.57609	5.26689	5.2831	8	8	7	6	8	8	7	6	F5H5D3	0.179598	0.0704731	0.246958	0.0481384	0.228929	0.225903	0.168279	0.0727886	0.213873	0.0493119
>Proteimics identification	277	P06280	P06280	GLA	Alpha-galactosidase A	549;789;1263;1496;1587	1542;1543;2175;3454;3455;4077;4078;4301	P06280	5	5	NO	15.6	15.6	48.766	429	35.854	0	3	5	>Quantification	P06280	P06280			177590	74926	102660	5.24942	4.87463	5.0114	3	3	3	3	5	5	5	5	P06280	0.110804	0.14339	0.248579	0.0955932	0.174611	0.227022	0.123622	0.158628	0.255266	0.0956033
>Proteimics identification	358	P23284	P23284	PPIB	Peptidyl-prolyl cis-trans isomerase B	354;607;866;867;1702;1768;1770;1775	1678;2396;2397;2398;4556;4557;4558;4725;4726;4728;4737;983;984	P23284	8	8	NO	35.2	35.2	23.742	216	76.331	0	7	5	>Quantification	P23284	P23284			2399200	1138900	1260400	6.38007	6.05649	6.10051	7	7	7	6	6	6	6	6	P23284	0.179048	0.124809	0.194097	0.265468	0.136437	0.100141	0.18414	0.102953	0.223678	0.235158
>Proteimics identification	120	E5RIP7	E5RIP7	IMPA1	Inositol-1-monophosphatase (Fragment)	1160;1497	3156;4079	E5RIP7;H0YBL1;P29218;P29218-3	2	2	NO	18.9	18.9	19.925	180	15.699	0	2	0	>Quantification	E5RIP7			E5RIP7	28974	28974	0	4.46201	4.46201	#NUM!	2	2	2	2	0	0	0	0	E5RIP7	0.104306	0.0405885	0.365002	0.0176793	0.0665633	0.405861
>Proteimics identification	526	Q9UHL4	Q9UHL4	DPP7	Dipeptidyl peptidase 2	291;654	1786;1787;840;841	Q9UHL4	2	2	NO	4.5	4.5	54.341	492	16.51	0	2	2	>Quantification	Q9UHL4	Q9UHL4			75799	40492	35308	4.87966	4.60737	4.54787	2	2	2	2	2	2	2	2	Q9UHL4	0.209904	0.0875606	0.204992	0.135832	0.285409	0.0763016	0.242781	0.0617971	0.185071	0.141126
>Proteimics identification	112	D6RFL4	D6RFL4	CD14	Monocyte differentiation antigen CD14 (Fragment)	41	109;110	D6RFL4;P08571	1	1	YES	8.9	8.9	23.313	213	22.529	0	1	1	>Quantification	D6RFL4	D6RFL4			141250	67163	74092	5.14999	4.82713	4.86977	1	1	1	1	1	1	1	1	D6RFL4	0.167453	0.112827	0.217433	0.0782296	0.232322	0.191735	0.194081	0.0694111	0.17653	0.0849279
>Proteimics identification	467	Q5GAN3	Q5GAN3	RNASE13	Probable inactive ribonuclease-like protein 13	998	2714;2715	Q5GAN3	1	1	YES	10.3	10.3	17.845	156	6.7198	0	1	1	>Quantification	Q5GAN3	Q5GAN3			49418	24175	25243	4.69389	4.38337	4.40214	1	1	1	1	1	1	1	1	Q5GAN3	0.215697	0.100273	0.181523	0.0836624	0.157783	0.261062	0.216751	0.0875654	0.164647	0.0856462
>Proteimics identification	210	M0R0Z5	M0R0Z5	CPAMD8	C3 and PZP-like alpha-2-macroglobulin domain-containing protein 8 (Fragment)	25	58;59;60	M0R0Z5;Q8IZJ3-2;Q8IZJ3	1	1	YES	3.8	3.8	36.018	338	6.9058	0	1	1	>Quantification	M0R0Z5				15486	7753.1	7732.8	4.18994	3.88948	3.88834	2	2	2	2	1	1	1	1	M0R0Z5	0.179255	0.0489509	0.274544	0.11721	0.28347	0.0965693	0.191629	0	0.323527	0.114946
>Proteimics identification	484	Q92484-2	Q92484	SMPDL3A	Isoform 2 of Acid sphingomyelinase-like phosphodiesterase 3a	1075;1857	2898;5008;5009	Q92484-2;Q92484	2	2	NO	9	9	37.285	322	11.254	0	2	1	>Quantification	Q92484-2			Q92484-2	55722	48002	7720.4	4.74603	4.68126	3.88764	2	2	1	1	1	1	0	0	Q92484-2	0.227046	0.0629214	0.212443	0.041681	0.173858	0.282051
>Proteimics identification	45	H7C5H1	H7C5H1	CFB	Complement factor B (Fragment)	386	1091;1092;1093	H7C5H1;A0A0G2JH38;E7ETN3;B4E1Z4;P00751	1	1	YES	5.2	5.2	34.581	305	9.3997	0	1	1	>Quantification	H7C5H1	H7C5H1			90483	39428	51055	4.95657	4.5958	4.70804	1	1	1	1	2	2	2	2	H7C5H1	0.206833	0.0672024	0.22454	0.107548	0.231947	0.161928	0.223144	0.0957363	0.266757	0.155029
>Proteimics identification	273	P05060	P05060	CHGB	Secretogranin-1	196;1061;1328;1726	2864;3594;4633;4634;582;583;584	P05060	4	4	NO	6.9	6.9	78.275	677	28.142	0	3	3	>Quantification	P05060	P05060			59829	25575	34254	4.77691	4.40782	4.53471	3	3	3	3	4	4	4	4	P05060	0.136728	0.261241	0.102908	0.215037	0.253468	0.0306175	0.163096	0.199533	0.142632	0.224143
>Proteimics identification	524	Q9UBX7-1	Q9UBX7	KLK11	Isoform 1 of Kallikrein-11	338;1092;1873;1920;1961	2926;2927;5036;5133;5134;5237;5238;5239;5240;5241;943	Q9UBX7-1;Q9UBX7	5	5	NO	30.8	30.8	27.465	250	48.853	0	5	3	>Quantification	Q9UBX7-1	Q9UBX7-1			623810	366070	257740	5.79505	5.56356	5.41118	6	6	5	4	5	5	5	4	Q9UBX7-1	0.171228	0.0483898	0.280755	0.0489612	0.209414	0.241252	0.318612	0.0508934	0.156775	0.166393
>Proteimics identification	68	A2A437	A2A437	PTPRF	Receptor-type tyrosine-protein phosphatase F (Fragment)	557	1557;1558	A2A437;P10586-2;P10586	1	1	YES	5.7	5.7	27.952	262	8.1215	0	1	0	>Quantification	A2A437			A2A437	26548	26548	0	4.42403	4.42403	#NUM!	2	2	2	2	0	0	0	0	A2A437	0.230519	0.0911946	0.178194	0.117234	0.251834	0.131024
>Proteimics identification	299	P09466-3	P09466	PAEP	Isoform 3 of Glycodelin	356;831;1793	2267;2268;2269;2270;4771;4772;4773;4774;4775;4776;4777;4778;4779;4780;4781;4782;4783;4784;4785;4786;4787;4788;4789;4790;4791;4792;4793;4794;4795;4796;4797;4798;4799;4800;4801;4802;986	P09466-3	3	1	YES	45.3	18.6	9.9528	86	-2	1	0	1	>Quantification	P09466-3			P09466-3	13461	0	13461	4.12908	#NUM!	4.12908	17	0	0	0	20	1	1	1	P09466-3							0	0.589708	0	0.275287
>Proteimics identification	291	P07954-2	P07954	FH	Isoform Cytoplasmic of Fumarate hydratase, mitochondrial	506	1415	P07954-2;P07954	1	1	YES	4.5	4.5	50.212	467	7.701	0	0	1	>Quantification	P07954-2			P07954-2	2703.5	0	2703.5	3.43193	#NUM!	3.43193	0	0	0	0	1	1	1	1	P07954-2							0.194251	0.065275	0.480597	0.039186
>Proteimics identification	195	I3L0K2	I3L0K2	TXNDC17	Thioredoxin domain-containing protein 17	1644	4413	I3L0K2;I3L3M7;Q9BRA2	1	1	YES	13.3	13.3	8.3713	75	6.5583	0.0041667	0	1	>Quantification	I3L0K2			I3L0K2	49897	0	49897	4.69807	#NUM!	4.69807	0	0	0	0	1	1	1	1	I3L0K2							0.158518	0.0845237	0.160147	0.0829053
>Proteimics identification	197	I3L1D5	I3L1D5	ALOX15B	Arachidonate 15-lipoxygenase B	107;1562	263;4245	I3L1D5;O15296-2;O15296-3;O15296-4;O15296	2	2	NO	5.1	5.1	74.486	664	17.289	0	0	2	>Quantification	I3L1D5			I3L1D5	19471	0	19471	4.28939	#NUM!	4.28939	0	0	0	0	2	2	2	2	I3L1D5							0.107783	0.0629799	2.07e-05	0.0759318
>Proteimics identification	193	H7C320	H7C320	GALM	Aldose 1-epimerase (Fragment)	121	296	H7C320;Q96C23	1	1	YES	8.8	8.8	21.349	194	8.6404	0	0	1	>Quantification	H7C320		H7C320	H7C320	14769	0	14769	4.16935	#NUM!	4.16935	0	0	0	0	1	1	1	1	H7C320							0	7.05e-07	0	0
>Proteimics identification	278	P06312	P06312	IGKV4-1	Immunoglobulin kappa variable 4-1	1103	2947	P06312	1	1	YES	7.4	7.4	13.38	121	6.4622	0.0060729	0	1	>Quantification	P06312			P06312	28874	0	28874	4.46051	#NUM!	4.46051	0	0	0	0	1	1	1	1	P06312							0.170769	0.0710914	0.154141	0.0547813
>Proteimics identification	520	Q9P2K2	Q9P2K2	TXNDC16	Thioredoxin domain-containing protein 16	1927	5145	Q9P2K2	1	1	YES	1.6	1.6	93.571	825	7.3453	0	0	1	>Quantification	Q9P2K2			Q9P2K2	6302.7	0	6302.7	3.79953	#NUM!	3.79953	0	0	0	0	1	1	1	1	Q9P2K2							0.174509	0.124286	0.246579	0.06958
>Proteimics identification	528	Q9UJJ9	Q9UJJ9	GNPTG	N-acetylglucosamine-1-phosphotransferase subunit gamma	1652	4433	Q9UJJ9	1	1	YES	3.3	3.3	33.973	305	8.4863	0	0	1	>Quantification	Q9UJJ9			Q9UJJ9	20894	0	20894	4.32002	#NUM!	4.32002	0	0	0	0	1	1	1	1	Q9UJJ9							0.159375	0.170875	0.197755	0.202184
>Proteimics identification	102	C9JKV5	C9JKV5	MLPH	Melanophilin (Fragment)	206	608	C9JKV5;Q9BV36-5;Q9BV36-3;Q9BV36-4;Q9BV36-2;Q9BV36	1	1	YES	9.2	9.2	15.368	131	6.3304	0.0058708	0	1	>Quantification	C9JKV5			C9JKV5	48276	0	48276	4.68373	#NUM!	4.68373	0	0	0	0	1	1	1	1	C9JKV5							0.22648	0.0720445	0.143474	0.0441468
>Proteimics identification	100	C9JLK2	C9JLK2	APEH	Acylamino-acid-releasing enzyme (Fragment)	1452	3944	C9JLK2;H7C393;H7C1U0;C9JIF9;P13798	1	1	YES	5.2	5.2	26.028	232	7.5521	0	0	1	>Quantification	C9JLK2			C9JLK2	11851	0	11851	4.07375	#NUM!	4.07375	0	0	0	0	1	1	1	1	C9JLK2							0.239547	0.0825462	0.253942	0.0961687
>Proteimics identification	333	P15374	P15374	UCHL3	Ubiquitin carboxyl-terminal hydrolase isozyme L3	1874	5037	P15374	1	1	YES	7	7	26.182	230	8.8046	0	0	1	>Quantification	P15374			P15374	25783	0	25783	4.41133	#NUM!	4.41133	0	0	0	0	1	1	1	1	P15374							0.187961	0.0711047	0.174357	0.0543113
>Proteimics identification	90	E7ENZ3	E7ENZ3	CCT5	T-complex protein 1 subunit epsilon	1882	5053	E7ENZ3;B7ZAR1;E9PCA1;P48643-2;P48643	1	1	YES	3.5	3.5	53.848	486	6.8326	0	0	1	>Quantification	E7ENZ3			E7ENZ3	1631.3	0	1631.3	3.21253	#NUM!	3.21253	0	0	0	0	1	1	1	1	E7ENZ3							1.62e-05	0	0.996781	0
>Proteimics identification	93	C9J0J0	C9J0J0	CCDC126	Coiled-coil domain-containing protein 126 (Fragment)	1643	4411;4412	C9J0J0;Q96EE4	1	1	YES	10.9	10.9	12.711	110	6.8666	0	1	1	>Quantification	C9J0J0			C9J0J0	8232.6	3433.5	4799.1	3.91554	3.53574	3.68116	1	1	0	0	1	1	1	1	C9J0J0							1.62e-05	0	0.996781	0
>Proteimics identification	234	O75882-3	O75882	ATRN	Isoform 3 of Attractin	1184	3219	O75882-3;O75882-2;O75882	1	1	YES	0.8	0.8	133.7	1198	6.6112	0.0020921	0	1	>Quantification	O75882-3			O75882-3	5866.7	0	5866.7	3.76839	#NUM!	3.76839	0	0	0	0	1	1	1	1	O75882-3							0.186963	0.102977	0.133694	0.108559
>Proteimics identification	236	Q5SR54	Q5SR54	CLSTN1	Calsyntenin-1 (Fragment)	10	28	Q5SR54;O94985-2;O94985	1	1	YES	2.3	2.3	88.039	782	6.5855	0.0041754	0	1	>Quantification	Q5SR54			Q5SR54	15366	0	15366	4.18656	#NUM!	4.18656	0	0	0	0	1	1	1	1	Q5SR54							0.0842672	0.172287	0.133702	0.034429
>Proteimics identification	136	E9PHK0	E9PHK0	CLEC3B	Tetranectin	1038	2814;2815	E9PHK0;P05452	1	1	YES	7.5	7.5	17.794	160	6.3605	0.0059642	0	1	>Quantification	E9PHK0			E9PHK0	18367	0	18367	4.26404	#NUM!	4.26404	0	0	0	0	2	2	2	2	E9PHK0							0.0539656	0.214037	0.0585615	0.200265
>Proteimics identification	494	Q96EY7	Q96EY7	PTCD3	Pentatricopeptide repeat domain-containing protein 3, mitochondrial	1051	2837	Q96EY7	1	1	YES	1.5	1.5	78.549	689	6.742	0	0	1	>Quantification	Q96EY7			Q96EY7	394.37	0	394.37	2.5959	#NUM!	2.5959	0	0	0	0	1	1	1	1	Q96EY7							0.24357	0.0584658	0.100832	0.0589842
>Proteimics identification	139	E9PLY4	E9PLY4	PRCP	Lysosomal Pro-X carboxypeptidase (Fragment)	829	2263;2264	E9PLY4;E9PNF7;E9PQB5;E9PL85;E9PNJ1;E9PQN3;E9PKN6;E9PIG4;P42785;P42785-2	1	1	YES	19.2	19.2	11.004	99	7.1375	0	0	1	>Quantification	E9PLY4			E9PLY4	65860	0	65860	4.81862	#NUM!	4.81862	0	0	0	0	2	2	2	2	E9PLY4							0.0840833	0.0670736	0.634076	0.0496026
>Proteimics identification	405	Q5JUV6	Q5JUV6	NT5C2	Cytosolic purine 5'-nucleotidase (Fragment)	272	805	Q5JUV6;P49902-2;P49902	1	1	YES	10.3	10.3	16.474	146	8.2001	0	0	1	>Quantification	Q5JUV6			Q5JUV6	15874	0	15874	4.20069	#NUM!	4.20069	0	0	0	0	1	1	1	1	Q5JUV6							0.142553	0.0662471	0.148998	0.114942
>Proteimics identification	373	P30085-2	P30085	CMPK1	Isoform 2 of UMP-CMP kinase	1569	4259	P30085-2;P30085	1	1	YES	10.2	10.2	16.548	147	6.5566	0.0041408	0	1	>Quantification	P30085-2		P30085-2	P30085-2	13388	0	13388	4.12672	#NUM!	4.12672	0	0	0	0	1	1	1	1	P30085-2							0	1.06e-05	0	0.239411
>Proteimics identification	89	E9PCC0	E9PCC0	STK32B	Serine/threonine-protein kinase 32B	1245	3419	E9PCC0;B7Z9H7;Q8WU08-2;Q8WU08-3;Q9NY57-2;Q86UX6-2;Q8WU08;Q9NY57;Q86UX6	1	1	YES	2.7	2.7	39.389	337	-2	1	0	1	>Quantification	E9PCC0			E9PCC0	5124600	0	5124600	6.70966	#NUM!	6.70966	0	0	0	0	1	1	1	1	E9PCC0							0.176276	0.237539	0.116942	0.202822
>Proteimics identification	396	P43686-2	P43686	PSMC4	Isoform 2 of 26S proteasome regulatory subunit 6B	475	1306	P43686-2;P43686	1	1	YES	4.7	4.7	43.507	387	6.7455	0	0	1	>Quantification	P43686-2			P43686-2	5330.5	0	5330.5	3.72677	#NUM!	3.72677	0	0	0	0	1	1	1	1	P43686-2							0.439919	0.119707	0	0.000366273
>Proteimics identification	84	C9JLP2	C9JLP2	STEAP2	Metalloreductase STEAP2 (Fragment)	916	2504	C9JLP2;B5MC02;Q8NFT2-3;Q8NFT2-2;Q8NFT2	1	1	YES	12.7	12.7	20.209	181	6.7243	0	0	1	>Quantification	C9JLP2		C9JLP2	C9JLP2	4870.5	0	4870.5	3.68757	#NUM!	3.68757	0	0	0	0	1	1	1	1	C9JLP2							0	1.21e-05	0	0.298599
>Proteimics identification	240	Q5SYQ7	Q5SYQ7	ALDH1A1	Retinal dehydrogenase 1 (Fragment)	1225;1647	3326;4420	Q5SYQ7;Q5SYQ9;Q5SYQ8;P00352	2	2	NO	13.8	13.8	22.654	203	11.639	0	0	2	>Quantification	Q5SYQ7			Q5SYQ7	46912	0	46912	4.67128	#NUM!	4.67128	0	0	0	0	2	2	2	2	Q5SYQ7							0.151627	0.0940635	0.210721	0.0976091
>Proteimics identification	519	Q9P0K7-4	Q9P0K7	RAI14	Isoform 4 of Ankycorbin	392	1103	Q9P0K7-4;Q9P0K7-3;Q9P0K7;Q9P0K7-2	1	1	YES	1.3	1.3	106.9	951	-2	1	0	1	>Quantification	Q9P0K7-4			Q9P0K7-4	6366.6	0	6366.6	3.80391	#NUM!	3.80391	0	0	0	0	1	1	1	1	Q9P0K7-4							0.101878	0.414933	0.0264096	0.136778
>Proteimics identification	459	Q14515-2	Q14515	SPARCL1	Isoform 2 of SPARC-like protein 1	1502	4097	Q14515-2;Q14515	1	1	YES	3	3	61.759	539	8.6169	0	0	1	>Quantification	Q14515-2			Q14515-2	2977.4	0	2977.4	3.47384	#NUM!	3.47384	0	0	0	0	1	1	1	1	Q14515-2							0.340021	0.12988	0.281371	0.247822
>Proteimics identification	170	G3V3G0	G3V3G0	PROX2	Prospero homeobox protein 2	1235	3358	G3V3G0;Q3B8N5-2;Q3B8N5	1	1	YES	3.4	3.4	65.571	592	-2	1	0	1	>Quantification	G3V3G0			G3V3G0	23886	0	23886	4.37814	#NUM!	4.37814	0	0	0	0	1	1	1	1	G3V3G0							0.0319682	0.0462423	0.86528	0.000652768
>Proteimics identification	187	H7C457	H7C457	COL18A1	Collagen alpha-1(XVIII) chain (Fragment)	1150	3056	H7C457;H7BXV5;P39060-2;P39060-1;P39060	1	1	YES	3.2	3.2	30.917	280	6.3238	0.0058366	0	1	>Quantification	H7C457			H7C457	43041	0	43041	4.63388	#NUM!	4.63388	0	0	0	0	1	1	1	1	H7C457							0.173189	0.115771	0.29702	0.137295
>Proteimics identification	188	H7BXY3	H7BXY3	DHX30	Putative ATP-dependent RNA helicase DHX30	1931	5158	H7BXY3;Q7L2E3-3;Q7L2E3;Q7L2E3-2	1	1	YES	1.4	1.4	130.55	1166	-2	1	0	1	>Quantification	H7BXY3			H7BXY3	1862.3	0	1862.3	3.27005	#NUM!	3.27005	0	0	0	0	1	1	1	1	H7BXY3							0.129256	0.108162	0.489184	0.0796233
>Proteimics identification	15	A0A087WYS1	A0A087WYS1	UGP2	UTP--glucose-1-phosphate uridylyltransferase	728;871	2002;2404	A0A087WYS1;E7EUC7;Q16851-2;Q16851	2	2	NO	5.3	5.3	56.967	508	11.748	0	0	2	>Quantification	A0A087WYS1			A0A087WYS1	7065.7	0	7065.7	3.84916	#NUM!	3.84916	0	0	0	0	2	2	2	2	A0A087WYS1							0.158035	0.0408327	0.235785	0.0566887
>Proteimics identification	207	K7EP32	K7EP32	UBXN6	UBX domain-containing protein 6 (Fragment)	390	1098	K7EP32;Q9BZV1-2;Q9BZV1	1	1	YES	5.1	5.1	41.958	371	8.1541	0	0	1	>Quantification	K7EP32			K7EP32	2228.8	0	2228.8	3.34807	#NUM!	3.34807	0	0	0	0	1	1	1	1	K7EP32							0.227243	0.0979683	0.175302	0
>Proteimics identification	129	G3XAM2	G3XAM2	CFI	Complement factor I	1758	4698	G3XAM2;E7ETH0;P05156	1	1	YES	1.7	1.7	65.059	576	7.0379	0	0	1	>Quantification	G3XAM2			G3XAM2	6833.5	0	6833.5	3.83464	#NUM!	3.83464	0	0	0	0	1	1	1	1	G3XAM2							0.196273	0.102376	0.273074	0.062604
>Proteimics identification	384	P35270	P35270	SPR	Sepiapterin reductase	1121;1805	2983;4870;4871	P35270	2	2	NO	11.5	11.5	28.048	261	14.727	0	1	2	>Quantification	P35270			P35270	18397	8899.2	9497.4	4.26475	3.94935	3.9776	1	1	0	0	2	2	1	1	P35270							0.159217	0.0649009	0.124291	0.0743524
>Proteimics identification	386	P36955	P36955	SERPINF1	Pigment epithelium-derived factor	1035	2810	P36955	1	1	YES	3.6	3.6	46.312	418	6.3259	0.0058594	0	1	>Quantification	P36955			P36955	3711.6	0	3711.6	3.56956	#NUM!	3.56956	0	0	0	0	1	1	1	1	P36955							0	0.275359	0.52033	0.203527
>Proteimics identification	388	P38606-2	P38606	ATP6V1A	Isoform 2 of V-type proton ATPase catalytic subunit A	441	1207	P38606-2;P38606	1	1	YES	3.1	3.1	64.735	584	7.6298	0	0	1	>Quantification	P38606-2			P38606-2	5698.8	0	5698.8	3.75578	#NUM!	3.75578	0	0	0	0	1	1	1	1	P38606-2							0.206933	0.0628644	0.219645	0.0521897
>Proteimics identification	69	A2IDB2	A2IDB2	YWHAH	14-3-3 protein eta (Fragment)	457;1283	1251;3492;3493	A2IDB2;Q04917	2	1	YES	14.2	9.3	18.675	162	6.8043	0	0	1	>Quantification	A2IDB2			A2IDB2	7656.1	0	7656.1	3.88401	#NUM!	3.88401	1	0	0	0	2	1	1	1	A2IDB2							0.175178	0.0975559	0	0
>Proteimics identification	468	Q5T6H7	Q5T6H7	XPNPEP1	Xaa-Pro aminopeptidase 1	233	665	Q5T6H7;Q9NQW7-2;Q9NQW7;Q9NQW7-4;Q9NQW7-3	1	1	YES	2.5	2.5	62.138	552	6.7631	0	0	1	>Quantification	Q5T6H7			Q5T6H7	3853.7	0	3853.7	3.58588	#NUM!	3.58588	0	0	0	0	1	1	1	1	Q5T6H7							0.18999	0.0633855	0	0.135473
>Proteimics identification	462	Q16401-2	Q16401	PSMD5	Isoform 2 of 26S proteasome non-ATPase regulatory subunit 5	950	2592	Q16401-2;Q16401	1	1	YES	4.1	4.1	51.311	461	7.7566	0	0	1	>Quantification	Q16401-2			Q16401-2	3079.8	0	3079.8	3.48852	#NUM!	3.48852	0	0	0	0	1	1	1	1	Q16401-2							0.176396	0.086985	0.162818	0.0444325
>Proteimics identification	167	G3V5D6	G3V5D6	ZFYVE21	Zinc finger FYVE domain-containing protein 21	1242	3415	G3V5D6;G3V2M2;Q9BQ24;Q9BQ24-2	1	1	YES	19.4	19.4	7.0329	62	-2	1	0	1	>Quantification	G3V5D6			G3V5D6	446110	0	446110	5.64944	#NUM!	5.64944	0	0	0	0	1	1	1	1	G3V5D6							0.189195	0.103276	0.198995	0.0862989
>Proteimics identification	160	J3QS47	J3QS47	CYB561	Cytochrome b561	389	1097	J3QS47;J3QRH5;J3KSL5;F5H757;P49447	1	1	YES	4.5	4.5	24.68	222	8.4863	0	0	1	>Quantification	J3QS47			J3QS47	35775	0	35775	4.55358	#NUM!	4.55358	0	0	0	0	1	1	1	1	J3QS47							0.180421	0.0839177	0.27322	0.0827374
>Proteimics identification	161	F6TLX2	F6TLX2	GLOD4	Glyoxalase domain-containing protein 4	468	1288	F6TLX2;Q9HC38-2;Q9HC38	1	1	YES	2	2	54.719	502	6.3456	0.0059055	0	1	>Quantification	F6TLX2			F6TLX2	3533.6	0	3533.6	3.54822	#NUM!	3.54822	0	0	0	0	1	1	1	1	F6TLX2							0.163091	0.0589923	0.14583	0.0817036
>Proteimics identification	162	F8VWZ8	F8VWZ8	ARHGAP29	Rho GTPase-activating protein 29	1423	3861	F8VWZ8;Q52LW3-2;Q52LW3	1	1	YES	1.9	1.9	117.42	1035	-2	1	0	1	>Quantification	F8VWZ8			F8VWZ8	15387	0	15387	4.18715	#NUM!	4.18715	0	0	0	0	1	1	1	1	F8VWZ8							0.168326	0.22129	0.608292	0
>Proteimics identification	163	F8W1V3	F8W1V3	TMBIM6	Bax inhibitor 1	1125	2991	F8W1V3;P55061;P55061-2	1	1	YES	6	6	22.228	200	-2	1	0	1	>Quantification	F8W1V3			F8W1V3	170040	0	170040	5.23055	#NUM!	5.23055	0	0	0	0	1	1	1	1	F8W1V3							0.13947	0.212844	0.132751	0.182055
>Proteimics identification	352	P21399	P21399	ACO1	Cytoplasmic aconitate hydratase	104;915;1536	2503;258;4172	P21399	3	3	NO	6.4	6.4	98.398	889	21.662	0	0	3	>Quantification	P21399			P21399	6252.2	0	6252.2	3.79603	#NUM!	3.79603	0	0	0	0	3	3	1	1	P21399							0.152061	0.0542192	0.244968	0.0645108
>Proteimics identification	351	P20618	P20618	PSMB1	Proteasome subunit beta type-1	659	1797	P20618	1	1	YES	5.8	5.8	26.489	241	7.5046	0	0	1	>Quantification	P20618			P20618	15844	0	15844	4.19986	#NUM!	4.19986	0	0	0	0	1	1	1	1	P20618							0.212635	0.0818718	0.202038	0.0942624
>Proteimics identification	359	P23381-2	P23381	WARS	Isoform 2 of Tryptophan--tRNA ligase, cytoplasmic	79;932	199;2540	P23381-2;P23381	2	2	NO	8.6	8.6	48.851	430	13.03	0	1	1	>Quantification	P23381-2			P23381-2	17236	4075.2	13161	4.23644	3.61015	4.11929	1	1	0	0	1	1	1	1	P23381-2							0.623413	0.162939	0	0.212911
>Proteimics identification	54	K7ES72	K7ES72	CAPS	Calcyphosin (Fragment)	395	1109	K7ES72;A0A0X1KG78;K7EL21;Q13938-3;Q13938	1	1	YES	7.5	7.5	14.593	134	6.2608	0.0096339	0	1	>Quantification	K7ES72			K7ES72	9868.3	0	9868.3	3.99424	#NUM!	3.99424	0	0	0	0	1	1	1	1	K7ES72							0.131264	0.0942821	0.193903	0.0850942
>Proteimics identification	52	A0A0J9YXZ5	A0A0J9YXZ5	IQGAP1	Ras GTPase-activating-like protein IQGAP1	894	2457	A0A0J9YXZ5;P46940	1	1	YES	1.5	1.5	136	1191	28.528	0	0	1	>Quantification	A0A0J9YXZ5			A0A0J9YXZ5	1776.1	0	1776.1	3.24947	#NUM!	3.24947	0	0	0	0	1	1	1	1	A0A0J9YXZ5							0.163739	0.0776571	0.216574	0.0964889
>Proteimics identification	533	Q9Y263	Q9Y263	PLAA	Phospholipase A-2-activating protein	59	159	Q9Y263	1	1	YES	2.1	2.1	87.156	795	6.3066	0.0077519	0	1	>Quantification	Q9Y263		Q9Y263	Q9Y263	699.56	0	699.56	2.84482	#NUM!	2.84482	0	0	0	0	1	1	1	1	Q9Y263							0.99362	0	0.00637059	8.25e-06
>Proteimics identification	220	O00755	O00755	WNT7A	Protein Wnt-7a	983	2663	O00755	1	1	YES	3.4	3.4	39.005	349	-2	1	0	1	>Quantification	O00755			O00755	25572	0	25572	4.40776	#NUM!	4.40776	0	0	0	0	1	1	1	1	O00755							0.153751	0.251242	0.0892536	0.249083
>Proteimics identification	390	P40227-2	P40227	CCT6A	Isoform 2 of T-complex protein 1 subunit zeta	93	228	P40227-2;P40227	1	1	YES	1.9	1.9	53.288	486	8.1894	0	0	1	>Quantification	P40227-2			P40227-2	6663.5	0	6663.5	3.8237	#NUM!	3.8237	0	0	0	0	1	1	1	1	P40227-2							0.166361	0.0862978	0.273612	0.0473804
>Proteimics identification	151	H3BN68	H3BN68	TMC5	Transmembrane channel-like protein	1309	3547	H3BN68;F5GYU8;Q6UXY8-4;Q6UXY8-3;Q6UXY8-2;Q6UXY8	1	1	YES	2.2	2.2	80.141	689	6.314	0.0058252	0	1	>Quantification	H3BN68		H3BN68	H3BN68	1041.9	0	1041.9	3.01783	#NUM!	3.01783	0	0	0	0	1	1	1	1	H3BN68							0	7.05e-07	0	0
[truncated: 39 more columns]
