# Supplementary material for: Quantitative Proteomic Analysis of Human Seminal Plasma from Normozoospermic and Asthenozoospermic Individuals
Source: Biomed Res Int. 2019 Mar 10;2019:2735038. doi: 10.1155/2019/2735038 (PMC6431472; doi:10.1155/2019/2735038)
Supplement: Supplementary 8 — Supplementary Data 3. Detailed information for functional annotation. [file 2735038.f8.xlsx]

## Sheet: GO-CC
Category	ID	Name	Source	p-value	FDR	Hit Count in Query List	Hit Count in Genome	Hit in Query List
GO: Cellular Component	GO:0005615	extracellular space		3.742e-96	2.41e-93	203	1449	HEXB,A2M,AOC1,MAN2A1,MAN2B1,MANBA,CES5A,CFL1,ACPP,SERPINF1,ACTB,CD109,ACTG2,GOLM1,CRISP3,ACTN1,AKR1A1,MDH1,PFN1,PGC,IGLL5,TTR,LRG1,CKB,S100A11,SIAE,UBA52,SERPINA1,SERPINA4,EFEMP1,CPQ,PIGR,WFDC2,CLU,CRISP1,CLIC1,LIPG,SPON2,BSPH1,AGT,PIP,HPX,PLA2G2A,ALAD,SPARCL1,ALB,MMP2,PRDX5,SERPINF2,ALDOA,ITM2B,HSPA1A,HSPA2,HSPA6,HSPA8,NAXE,SDCBP,HSPB1,EZR,SEMG1,ATRN,SEMG2,COL6A2,SELENOP,SEMA3C,COL12A1,VTN,FMOD,…
GO: Cellular Component	GO:0031410	cytoplasmic vesicle		1.778e-47	4.561e-45	141	1355	HEXA,HEXB,A2M,HSP90B1,ACR,ESD,ACPP,SERPINF1,CRISP3,ACTN1,CHGB,ADAM10,UBA52,SERPINA1,FASN,SERPINA4,PIGR,PLA1A,CLU,TPP1,ZFYVE21,HPX,PLA2G2A,FAM3C,ALB,MME,BAIAP2,PRDX5,SERPINF2,ALDOA,ITM2B,MLPH,HSPA5,HSPA8,SDCBP,HSP90AA1,HSP90AB1,DPP7,SELENOP,ANG,HYOU1,FN1,ADAMTS1,ANXA1,ANXA2,ANXA3,WNT7A,ANXA5,ANXA7,ANXA11,OLFM4,RAB3D,APLP2,APOA1,CPE,APOH,APP,PPIB,RAB6B,YWHAB,YWHAE,YWHAG,YWHAH,YWHAZ,PRDX6,CARTPT,ARS…
GO: Cellular Component	GO:0030141	secretory granule		4.301e-38	6.924e-36	71	400	HEXA,HEXB,A2M,ACR,ACPP,CRISP3,ACTN1,CHGB,SERPINA1,SERPINA4,PLA1A,CLU,PLA2G2A,FAM3C,ALB,BAIAP2,SERPINF2,ALDOA,SELENOP,FN1,ANXA3,ANXA7,ANXA11,OLFM4,RAB3D,APLP2,APOA1,CPE,APOH,APP,CARTPT,ARSA,SMPD1,CTSH,SOD1,SPINK2,ACRBP,GARS,PATE4,QSOX1,RAB10,TEX101,SERPING1,RAB7A,RAB3A,RAB3B,RAB27A,RAB27B,CA4,CALR,CAMP,LAMP1,LAMP2,ECM1,SYT7,TF,PDIA3,LGALS3BP,LEFTY2,CCT6A,ORM1,ORM2,THBS1,CD9,TIMP1,CLEC3B,LTF,LYZ,CD…
GO: Cellular Component	GO:0005764	lysosome		4.589e-37	4.925e-35	80	539	HEXA,HEXB,MAN2B1,MANBA,ACPP,SIAE,UBA52,UBA1,CPQ,TPP1,CLN5,HSPA8,HSP90AA1,HSP90AB1,DPP7,FMOD,ANPEP,ANXA1,ANXA2,ANXA11,OLFM4,CP,NPC2,YWHAZ,PRDX6,ARSA,IGF2R,ASAH1,PRCP,RNASET2,CST3,DNAJC5,CTBS,SMPD1,CHID1,FUCA1,EPDR1,CTSB,CTSD,CTSH,CTSL,CTSZ,GAA,SOD1,LGMN,ATP6V1A,CTSF,GALNS,PSAP,MYO6,NAGLU,GC,ACE,TMBIM1,PEBP4,GGH,NEU1,GLA,GLB1,RAB7A,GM2A,GNB1,GNB2,RAB2A,GNS,RAB27A,DNASE2,GOT1,GPC1,DPP4,LAMP1,LAMP2,N…
GO: Cellular Component	GO:0099503	secretory vesicle		1.436e-35	1.321e-33	78	535	HEXA,HEXB,A2M,ACR,ACPP,CRISP3,ACTN1,CHGB,SERPINA1,SERPINA4,PLA1A,CLU,PLA2G2A,FAM3C,ALB,MME,BAIAP2,SERPINF2,ALDOA,HSPA8,SELENOP,FN1,ANXA3,ANXA5,ANXA7,ANXA11,OLFM4,RAB3D,APLP2,APOA1,CPE,APOH,APP,CARTPT,ARSA,DNAJC5,SMPD1,CTSH,SOD1,SPINK2,ACRBP,GARS,DBI,PATE4,QSOX1,RAB10,TEX101,SERPING1,RAB7A,RAB3A,RAB3B,RAB27A,RAB27B,CA4,CALR,CAMP,LAMP1,LAMP2,ECM1,SYT7,TF,PDIA3,LGALS3BP,LEFTY2,CCT6A,ORM1,ORM2,THBS1,…
GO: Cellular Component	GO:0005773	vacuole		6.487e-32	5.222e-30	112	1223	HEXA,HEXB,MAN2B1,MANBA,ACR,ACPP,TSG101,SIAE,UBA52,UBA1,MVB12A,CPQ,PIGR,LIPG,TPP1,CLN5,ZFYVE21,ITM2B,HSPA8,HSP90AA1,HSP90AB1,DPP7,EZR,FMOD,ANPEP,ANXA1,ANXA2,ANXA11,OLFM4,CP,APOA1,NPC2,VPS25,APP,YWHAZ,PRDX6,ZFYVE28,ARSA,IGF2R,ASAH1,PRCP,RNASET2,CST3,DNAJC5,CTBS,SMPD1,CHID1,FUCA1,EPDR1,RAB21,CTSB,CTSD,CTSH,CTSL,CTSZ,GAA,SOD1,LGMN,ATP6V1A,CTSF,GALNS,PSAP,MYO6,GLB1L,B2M,NAGLU,RAB11A,GC,STEAP2,ACE,TMBI…
GO: Cellular Component	GO:0005925	focal adhesion		7.405e-22	2.384e-20	52	393	HSP90B1,RPLP1,CFL1,ACTB,ACTN1,PFN1,ADAM10,ZFYVE21,MME,HSPA1A,HSPA5,HSPA8,SDCBP,HSPB1,VCL,CAP1,EZR,HYOU1,ANXA1,ANXA5,PPIA,PPIB,YWHAB,YWHAE,YWHAG,YWHAZ,PPP1CB,IGF2R,PRKAR2A,RAB21,B2M,GDI2,IQGAP1,RAB10,CAPN5,YWHAQ,NME2,GNB2,DPP4,PDCD6IP,CALR,CORO1B,NCSTN,LCP1,PDIA3,GSN,CD9,P4HB,CD59,CD81,CDC42,CDH1
GO: Cellular Component	GO:0005604	basement membrane		9.658e-13	2.073e-11	21	109	MATN2,SERPINF1,EFEMP1,ALB,VTN,ANG,FN1,ADAMTS1,ANXA2,VWA1,CST3,SMOC2,PTN,LAMA5,LAMB2,LAMC1,TF,COL18A1,TIMP1,TIMP2,AGRN
GO: Cellular Component	GO:0009986	cell surface		4.979e-12	1.002e-10	61	873	CD109,ADAM10,IGLL5,CLU,LIPG,BSPH1,SERPINF2,HSPA2,HSPA5,HSPA8,HSP90AA1,HSP90AB1,ANPEP,FOLH1,ANXA1,ANXA2,ANXA4,WNT7A,ANXA5,APOA1,CPM,APOH,APP,CLSTN1,RHOC,ARSA,IGF2R,RAB21,CTSB,IL6ST,B2M,RAB11A,ACE,GGT1,B4GALT1,PTN,NEU1,CAPN5,CA4,DPP4,CALR,LAMP1,TF,PDIA3,TGFBR3,THBS1,CD9,CD14,TIMP2,ADGRG2,P4HB,PEBP1,LPL,CD38,CD59,IL1RL1,LTF,CDH1,AGRN,SERPINA5,MSLN
GO: Cellular Component	GO:0005794	Golgi apparatus		5.576e-09	8.977e-08	79	1518	MAN2A1,ACO1,ACR,ACPP,GOLM1,ADAM10,B4GALT5,SERPINA1,FASN,CPQ,CLU,LIPG,CLN5,FAM3C,ALB,ITM2B,DPP7,VTN,FMOD,WNT7A,ST6GAL1,CPD,CPE,APP,CLSTN1,RAB6B,ARF3,ARF4,AKR7A2,IGF2R,RUVBL1,CHID1,FUT5,RAB21,MUC6,CTSZ,SOD3,CAND1,MYO6,B2M,PSMB3,RAB11A,DBI,GNPTG,PTGDS,STEAP2,GDI2,TMBIM1,B4GALT1,QSOX1,RAB10,GLA,GLB1,CANT1,GLG1,RAB7A,RAB1A,RAB2A,RAB27A,RAB27B,CA4,DOPEY2,GPC1,KLK11,DPP4,CALR,NUCB1,STEAP4,MUC5B,NCSTN,TG…
GO: Cellular Component	GO:0097708	intracellular vesicle		2.125e-47	4.561e-45	141	1357	HEXA,HEXB,A2M,HSP90B1,ACR,ESD,ACPP,SERPINF1,CRISP3,ACTN1,CHGB,ADAM10,UBA52,SERPINA1,FASN,SERPINA4,PIGR,PLA1A,CLU,TPP1,ZFYVE21,HPX,PLA2G2A,FAM3C,ALB,MME,BAIAP2,PRDX5,SERPINF2,ALDOA,ITM2B,MLPH,HSPA5,HSPA8,SDCBP,HSP90AA1,HSP90AB1,DPP7,SELENOP,ANG,HYOU1,FN1,ADAMTS1,ANXA1,ANXA2,ANXA3,WNT7A,ANXA5,ANXA7,ANXA11,OLFM4,RAB3D,APLP2,APOA1,CPE,APOH,APP,PPIB,RAB6B,YWHAB,YWHAE,YWHAG,YWHAH,YWHAZ,PRDX6,CARTPT,ARS…
GO: Cellular Component	GO:0000323	lytic vacuole		4.589e-37	4.925e-35	80	539	HEXA,HEXB,MAN2B1,MANBA,ACPP,SIAE,UBA52,UBA1,CPQ,TPP1,CLN5,HSPA8,HSP90AA1,HSP90AB1,DPP7,FMOD,ANPEP,ANXA1,ANXA2,ANXA11,OLFM4,CP,NPC2,YWHAZ,PRDX6,ARSA,IGF2R,ASAH1,PRCP,RNASET2,CST3,DNAJC5,CTBS,SMPD1,CHID1,FUCA1,EPDR1,CTSB,CTSD,CTSH,CTSL,CTSZ,GAA,SOD1,LGMN,ATP6V1A,CTSF,GALNS,PSAP,MYO6,NAGLU,GC,ACE,TMBIM1,PEBP4,GGH,NEU1,GLA,GLB1,RAB7A,GM2A,GNB1,GNB2,RAB2A,GNS,RAB27A,DNASE2,GOT1,GPC1,DPP4,LAMP1,LAMP2,N…
GO: Cellular Component	GO:0005775	vacuolar lumen		1.032e-28	7.386e-27	36	116	HEXA,HEXB,MAN2B1,MANBA,TPP1,CLN5,HSPA8,HSP90AA1,FMOD,APP,ARSA,ASAH1,RNASET2,SMPD1,FUCA1,CTSB,CTSD,CTSH,CTSL,GAA,LGMN,CTSF,GALNS,PSAP,B2M,NAGLU,GC,NEU1,GLA,GLB1,GM2A,GNS,GPC1,LAMP2,LNPEP,AGRN
GO: Cellular Component	GO:0043202	lysosomal lumen		8.178e-27	5.266e-25	31	88	HEXA,HEXB,MAN2B1,MANBA,TPP1,HSPA8,HSP90AA1,FMOD,ARSA,ASAH1,RNASET2,SMPD1,FUCA1,CTSB,CTSD,CTSL,GAA,LGMN,CTSF,GALNS,PSAP,NAGLU,GC,NEU1,GLA,GLB1,GM2A,GNS,GPC1,LAMP2,AGRN
GO: Cellular Component	GO:0042470	melanosome		1.295e-26	6.952e-25	33	105	HSP90B1,SERPINF1,FASN,TPP1,MLPH,HSPA5,HSPA8,SDCBP,HSP90AA1,HSP90AB1,ANXA2,ANXA11,PPIB,YWHAB,YWHAE,YWHAZ,DNAJC5,CTSB,CTSD,NAP1L1,GGH,RAB7A,RAB1A,RAB2A,RAB27A,RAB27B,PDCD6IP,LAMP1,NCSTN,PDIA3,P4HB,PRDX1,SYTL1
GO: Cellular Component	GO:0048770	pigment granule		1.295e-26	6.952e-25	33	105	HSP90B1,SERPINF1,FASN,TPP1,MLPH,HSPA5,HSPA8,SDCBP,HSP90AA1,HSP90AB1,ANXA2,ANXA11,PPIB,YWHAB,YWHAE,YWHAZ,DNAJC5,CTSB,CTSD,NAP1L1,GGH,RAB7A,RAB1A,RAB2A,RAB27A,RAB27B,PDCD6IP,LAMP1,NCSTN,PDIA3,P4HB,PRDX1,SYTL1
GO: Cellular Component	GO:0044437	vacuolar part		4.609e-26	2.283e-24	76	700	HEXA,HEXB,MAN2B1,MANBA,ACR,ACPP,TSG101,UBA52,UBA1,MVB12A,PIGR,TPP1,CLN5,ITM2B,HSPA8,HSP90AA1,HSP90AB1,FMOD,ANPEP,ANXA1,ANXA2,CP,VPS25,APP,ZFYVE28,ARSA,IGF2R,ASAH1,RNASET2,DNAJC5,SMPD1,FUCA1,RAB21,CTSB,CTSD,CTSH,CTSL,GAA,LGMN,ATP6V1A,CTSF,GALNS,PSAP,MYO6,B2M,NAGLU,RAB11A,GC,STEAP2,TMBIM1,RAB10,NEU1,GLA,GLB1,RAB7A,GM2A,GNB1,GNB2,RAB2A,GNS,RAB27A,RAB27B,GPC1,VPS37C,DPP4,LAMP1,LAMP2,NCSTN,VPS37B,SYT7…
GO: Cellular Component	GO:0031012	extracellular matrix		1.327e-25	6.106e-24	60	444	HSP90B1,MATN2,SERPINF1,CRISP3,MFAP4,SERPINA1,FBLN2,EFEMP1,CLU,SPON2,PKM,SPARCL1,ALB,MMP2,HSP90AA1,COL6A2,COL12A1,VTN,FMOD,ANG,FN1,ADAMTS1,ANXA2,WNT7A,APCS,CPZ,VWA1,APOH,SLPI,CST3,CTSD,SOD1,SOD3,SPOCK1,SMOC2,PTN,SPOCK3,GLG1,NOV,GPC1,CRISPLD2,CALR,LAMA5,LAMB2,LAMC1,CRTAC1,ECM1,TF,LGALS3BP,LEFTY2,TGM4,TGFBR3,COL18A1,THBS1,TIMP1,TIMP2,LPL,CLEC3B,IL1RL1,AGRN
GO: Cellular Component	GO:0031983	vesicle lumen		6.164e-25	2.646e-23	32	108	A2M,HSP90B1,ACTN1,SERPINA1,SERPINA4,CLU,HPX,FAM3C,ALB,SERPINF2,ALDOA,HSP90AA1,SELENOP,HYOU1,FN1,ANPEP,APOA1,APOH,APP,QSOX1,SERPING1,CALR,ECM1,TF,LGALS3BP,LEFTY2,ORM1,ORM2,THBS1,TIMP1,CLEC3B,LTF
GO: Cellular Component	GO:0044433	cytoplasmic vesicle part		2.403e-24	9.67e-23	69	619	A2M,HSP90B1,ACR,ACTN1,UBA52,SERPINA1,SERPINA4,PLA1A,CLU,HPX,FAM3C,ALB,SERPINF2,ALDOA,ITM2B,HSPA8,HSP90AA1,SELENOP,HYOU1,FN1,ANXA1,ANXA3,WNT7A,ANXA7,APLP2,APOA1,CPE,APOH,APP,YWHAB,YWHAE,YWHAG,YWHAH,YWHAZ,DNAJC5,RAB21,MYO6,B2M,RAB11A,QSOX1,RAB10,TEX101,SERPING1,RAB7A,YWHAQ,RAB3A,RAB27A,RAB27B,CA4,SFN,CALR,LAMP1,LAMP2,ECM1,SYT7,TF,LGALS3BP,LEFTY2,ORM1,ORM2,THBS1,CD9,TIMP1,LNPEP,CD59,CLEC3B,LTF,SERPI…
GO: Cellular Component	GO:0060205	cytoplasmic vesicle lumen		2.779e-24	1.053e-22	31	104	A2M,HSP90B1,ACTN1,SERPINA1,SERPINA4,CLU,HPX,FAM3C,ALB,SERPINF2,ALDOA,HSP90AA1,SELENOP,HYOU1,FN1,APOA1,APOH,APP,QSOX1,SERPING1,CALR,ECM1,TF,LGALS3BP,LEFTY2,ORM1,ORM2,THBS1,TIMP1,CLEC3B,LTF
GO: Cellular Component	GO:0043209	myelin sheath		1.274e-22	4.559e-21	39	202	ACTB,MDH1,PGAM1,CKB,TUBB4A,PKM,ALB,HSPA2,HSPA5,HSPA8,VCP,HSP90AA1,EZR,ANXA2,CCT2,PPIA,YWHAG,CCT5,SOD1,ATP6V1A,GDI2,PHGDH,GNB1,NME2,GNB2,CA2,GPI,PDCD6IP,PRDX2,LDHB,PDIA3,GSN,MPP5,PEBP1,PRDX1,CD59,CDC42,CDH1,ENO1
GO: Cellular Component	GO:0072562	blood microparticle		7.007e-22	2.375e-20	33	143	A2M,ACTB,ACTG2,PFN1,IGLL5,CLU,CLIC1,AGT,HPX,ALB,SERPINF2,HSPA1A,HSPA2,HSPA6,HSPA8,SDCBP,VTN,FN1,ANXA5,APCS,CP,APOA1,YWHAZ,GC,CFB,SERPING1,C3,C4A,TF,GSN,LGALS3BP,ORM1,ORM2
GO: Cellular Component	GO:0005924	cell-substrate adherens junction		1.327e-21	4.069e-20	52	398	HSP90B1,RPLP1,CFL1,ACTB,ACTN1,PFN1,ADAM10,ZFYVE21,MME,HSPA1A,HSPA5,HSPA8,SDCBP,HSPB1,VCL,CAP1,EZR,HYOU1,ANXA1,ANXA5,PPIA,PPIB,YWHAB,YWHAE,YWHAG,YWHAZ,PPP1CB,IGF2R,PRKAR2A,RAB21,B2M,GDI2,IQGAP1,RAB10,CAPN5,YWHAQ,NME2,GNB2,DPP4,PDCD6IP,CALR,CORO1B,NCSTN,LCP1,PDIA3,GSN,CD9,P4HB,CD59,CD81,CDC42,CDH1
GO: Cellular Component	GO:0030055	cell-substrate junction		2.355e-21	6.895e-20	52	403	HSP90B1,RPLP1,CFL1,ACTB,ACTN1,PFN1,ADAM10,ZFYVE21,MME,HSPA1A,HSPA5,HSPA8,SDCBP,HSPB1,VCL,CAP1,EZR,HYOU1,ANXA1,ANXA5,PPIA,PPIB,YWHAB,YWHAE,YWHAG,YWHAZ,PPP1CB,IGF2R,PRKAR2A,RAB21,B2M,GDI2,IQGAP1,RAB10,CAPN5,YWHAQ,NME2,GNB2,DPP4,PDCD6IP,CALR,CORO1B,NCSTN,LCP1,PDIA3,GSN,CD9,P4HB,CD59,CD81,CDC42,CDH1
GO: Cellular Component	GO:0034774	secretory granule lumen		1.158e-19	3.242e-18	25	85	A2M,ACTN1,SERPINA1,SERPINA4,CLU,FAM3C,ALB,SERPINF2,ALDOA,SELENOP,FN1,APOA1,APOH,APP,QSOX1,SERPING1,ECM1,TF,LGALS3BP,LEFTY2,ORM1,ORM2,THBS1,TIMP1,CLEC3B
GO: Cellular Component	GO:0070161	anchoring junction		3.881e-19	1.041e-17	55	503	HSP90B1,RPLP1,CFL1,ACTB,ACTN1,PFN1,ADAM10,UBA1,ZFYVE21,MME,HSPA1A,HSPA5,HSPA8,SDCBP,HSPB1,VCL,CAP1,EZR,HYOU1,ANXA1,ANXA5,PPIA,PPIB,YWHAB,YWHAE,YWHAG,YWHAZ,PPP1CB,IGF2R,PRKAR2A,RAB21,B2M,GDI2,IQGAP1,B4GALT1,RAB10,CAPN5,YWHAQ,NME2,GNB2,DPP4,PDCD6IP,DSC2,CALR,CORO1B,NCSTN,LCP1,PDIA3,GSN,CD9,P4HB,CD59,CD81,CDC42,CDH1
GO: Cellular Component	GO:0005912	adherens junction		1.685e-18	4.339e-17	53	484	HSP90B1,RPLP1,CFL1,ACTB,ACTN1,PFN1,ADAM10,ZFYVE21,MME,HSPA1A,HSPA5,HSPA8,SDCBP,HSPB1,VCL,CAP1,EZR,HYOU1,ANXA1,ANXA5,PPIA,PPIB,YWHAB,YWHAE,YWHAG,YWHAZ,PPP1CB,IGF2R,PRKAR2A,RAB21,B2M,GDI2,IQGAP1,RAB10,CAPN5,YWHAQ,NME2,GNB2,DPP4,PDCD6IP,DSC2,CALR,CORO1B,NCSTN,LCP1,PDIA3,GSN,CD9,P4HB,CD59,CD81,CDC42,CDH1
GO: Cellular Component	GO:0005578	proteinaceous extracellular matrix		6.271e-18	1.553e-16	46	379	MATN2,SERPINF1,CRISP3,MFAP4,SERPINA1,FBLN2,EFEMP1,SPON2,SPARCL1,ALB,MMP2,COL6A2,COL12A1,VTN,FMOD,ANG,FN1,ADAMTS1,ANXA2,WNT7A,CPZ,VWA1,CST3,SPOCK1,SMOC2,PTN,SPOCK3,GLG1,NOV,GPC1,CRISPLD2,CALR,LAMA5,LAMB2,LAMC1,CRTAC1,ECM1,TF,LGALS3BP,TGFBR3,COL18A1,TIMP1,TIMP2,CLEC3B,IL1RL1,AGRN
GO: Cellular Component	GO:0031091	platelet alpha granule		6.116e-14	1.459e-12	19	75	A2M,ACTN1,SERPINA1,CLU,ALB,SERPINF2,ALDOA,FN1,APLP2,APP,QSOX1,SERPING1,LEFTY2,ORM1,ORM2,THBS1,CD9,TIMP1,SERPINA5
GO: Cellular Component	GO:0005788	endoplasmic reticulum lumen		2.484e-13	5.713e-12	29	207	HSP90B1,ESD,DNAJB9,SERPINA1,TXNDC16,HSPA5,COL6A2,SUMF2,COL12A1,VTN,HYOU1,WNT7A,APOA1,MINPP1,PPIB,ARSA,RNASET2,DNAJC3,CTSZ,ERAP1,B2M,OS9,CALR,PDIA3,SIL1,COL18A1,THBS1,P4HB,LYZ
GO: Cellular Component	GO:0031093	platelet alpha granule lumen		5.681e-13	1.262e-11	16	55	A2M,ACTN1,SERPINA1,CLU,ALB,SERPINF2,ALDOA,FN1,APP,QSOX1,SERPING1,LEFTY2,ORM1,ORM2,THBS1,TIMP1
GO: Cellular Component	GO:0044420	extracellular matrix component		3.08e-12	6.398e-11	23	141	MATN2,SERPINF1,MFAP4,EFEMP1,ALB,COL12A1,VTN,ANG,FN1,ADAMTS1,ANXA2,VWA1,CST3,SMOC2,PTN,LAMA5,LAMB2,LAMC1,TF,COL18A1,TIMP1,TIMP2,AGRN
GO: Cellular Component	GO:0005774	vacuolar membrane		2.509e-11	4.769e-10	47	593	ACPP,TSG101,UBA52,UBA1,MVB12A,PIGR,CLN5,ITM2B,HSPA8,HSP90AB1,ANPEP,ANXA1,ANXA2,CP,VPS25,ZFYVE28,IGF2R,DNAJC5,RAB21,GAA,ATP6V1A,PSAP,MYO6,B2M,RAB11A,STEAP2,TMBIM1,RAB10,NEU1,RAB7A,GNB1,GNB2,RAB2A,RAB27A,RAB27B,VPS37C,DPP4,LAMP1,LAMP2,NCSTN,VPS37B,SYT7,TF,TSPAN1,CD14,LNPEP,VPS28
GO: Cellular Component	GO:0030054	cell junction		2.518e-11	4.769e-10	73	1200	HSP90B1,AOC1,RPLP1,CFL1,ACTB,ACTN1,PFN1,ADAM10,UBA1,BASP1,ZFYVE21,MME,HSPA1A,HSPA5,HSPA8,SDCBP,HSPB1,VCL,CAP1,EZR,HYOU1,ANXA1,ANXA2,ANXA5,APP,CLSTN1,PPIA,PPIB,YWHAB,YWHAE,YWHAG,YWHAH,YWHAZ,PPP1CB,IGF2R,PRKAR2A,RAB21,B2M,STARD10,FBP2,GDI2,IQGAP1,B4GALT1,RAB10,NEU1,F11R,GLRA2,CAPN5,YWHAQ,NME2,GNB2,NOV,DPP4,RAP1B,PDCD6IP,DSC2,CALR,CAPZA1,CORO1B,NCSTN,LCP1,SYT7,PDIA3,GSN,MPP5,NAMPT,CD9,P4HB,CD59,CD81…
GO: Cellular Component	GO:0048471	perinuclear region of cytoplasm		7.917e-11	1.457e-09	52	724	HSP90B1,SERPINF1,ADAM10,CLU,CLIC1,CLN5,PLA2G2A,PRDX5,HSPA1A,MLPH,HSPA8,VCP,HSP90AA1,EZR,ANXA2,ANXA4,OLFM4,CPD,APOD,APP,PPIB,YWHAB,YWHAZ,ARF3,IGF2R,CST3,PRKAR2A,CTSB,PTGES3,GAPDH,MYO6,RAB11A,PSMC3,GC,DBI,PTGDS,PTN,RAB10,GLB1,KIF5B,NME2,GNB2,RAB3B,CA4,CALR,LAMP1,CORO1B,TF,GSN,TSPAN1,LNPEP,CDH1
GO: Cellular Component	GO:0012506	vesicle membrane		4.076e-10	7.292e-09	42	535	ACPP,ACTN1,UBA52,PLA1A,ITM2B,HSPA8,ANPEP,ANXA1,ANXA3,ANXA4,WNT7A,ANXA7,APLP2,CPE,YWHAB,YWHAE,YWHAG,YWHAH,YWHAZ,DNAJC5,RAB21,MYO6,B2M,RAB11A,RAB10,TEX101,RAB7A,YWHAQ,RAB3A,RAB27A,RAB27B,CA4,SFN,LAMP1,LAMP2,SYT7,TF,CD9,LNPEP,CD59,SERPINA5,SPACA3
GO: Cellular Component	GO:0005765	lysosomal membrane		1.59e-09	2.695e-08	28	277	ACPP,UBA52,UBA1,CLN5,HSPA8,HSP90AB1,ANPEP,ANXA2,CP,IGF2R,DNAJC5,GAA,ATP6V1A,PSAP,MYO6,TMBIM1,NEU1,RAB7A,GNB1,GNB2,RAB2A,DPP4,LAMP1,LAMP2,NCSTN,SYT7,TSPAN1,LNPEP
GO: Cellular Component	GO:0098852	lytic vacuole membrane		1.59e-09	2.695e-08	28	277	ACPP,UBA52,UBA1,CLN5,HSPA8,HSP90AB1,ANPEP,ANXA2,CP,IGF2R,DNAJC5,GAA,ATP6V1A,PSAP,MYO6,TMBIM1,NEU1,RAB7A,GNB1,GNB2,RAB2A,DPP4,LAMP1,LAMP2,NCSTN,SYT7,TSPAN1,LNPEP
GO: Cellular Component	GO:0030659	cytoplasmic vesicle membrane		4.361e-09	7.201e-08	39	513	ACTN1,UBA52,PLA1A,ITM2B,HSPA8,ANXA1,ANXA3,WNT7A,ANXA7,APLP2,CPE,YWHAB,YWHAE,YWHAG,YWHAH,YWHAZ,DNAJC5,RAB21,MYO6,B2M,RAB11A,RAB10,TEX101,RAB7A,YWHAQ,RAB3A,RAB27A,RAB27B,CA4,SFN,LAMP1,LAMP2,SYT7,TF,CD9,LNPEP,CD59,SERPINA5,SPACA3
GO: Cellular Component	GO:0005768	endosome		7.847e-09	1.233e-07	52	826	ACPP,TSG101,UBA52,UBA1,MVB12A,PIGR,LIPG,ZFYVE21,ITM2B,HSPA8,EZR,ANXA1,ANXA2,APOA1,VPS25,APP,ZFYVE28,ARSA,IGF2R,CST3,SMPD1,CHID1,RAB21,CTSB,CTSH,CTSL,LGMN,B2M,RAB11A,STEAP2,ACE,TMBIM1,RAB10,PTPRF,RAB7A,RAB1A,RAB3A,RAB27A,RAB27B,GPC1,VPS37C,PDCD6,NUCB1,STEAP4,LAMP1,LAMP2,VPS37B,TF,CD14,LNPEP,VPS28,CDH1
GO: Cellular Component	GO:0000502	proteasome complex		1.598e-08	2.45e-07	14	78	HSPB1,VCP,PSMA2,PSMA4,PSMA5,PSMA6,PSMB1,PSMB2,PSMB3,PSMC3,PSMC4,PSMD5,PSME1,OS9
GO: Cellular Component	GO:0097223	sperm part		2.174e-08	3.256e-07	21	184	HEXB,ACR,PLA1A,ALDOA,HSP90AA1,HSP90AB1,ARSA,CTSH,SPINK2,ACRBP,ACE,PATE4,TEX101,RAB3A,CALR,LDHA,PDIA3,GSTM3,CCT6A,SERPINA5,SPACA3
GO: Cellular Component	GO:0042827	platelet dense granule		2.255e-08	3.3e-07	8	20	SERPINA4,FAM3C,SELENOP,APOH,LAMP2,ECM1,LGALS3BP,CLEC3B
GO: Cellular Component	GO:0031089	platelet dense granule lumen		2.639e-08	3.777e-07	7	14	SERPINA4,FAM3C,SELENOP,APOH,ECM1,LGALS3BP,CLEC3B
GO: Cellular Component	GO:0045177	apical part of cell		5.014e-08	7.02e-07	33	428	ACPP,AKR1A1,PIP,HSPA1A,HSP90AA1,HSP90AB1,EZR,FN1,ANXA1,ANXA4,APP,SLC2A5,CTSB,LGMN,ATP6V1A,MYO6,REEP6,BTD,GM2A,RAB27A,RAB27B,CA2,CA4,GP2,DPP4,TF,PDIA3,CD9,ADGRG2,PEBP1,CD81,CDC42,CDH1
GO: Cellular Component	GO:0071682	endocytic vesicle lumen		1.395e-07	1.912e-06	7	17	HSP90B1,HPX,HSP90AA1,HYOU1,APOA1,CALR,LTF
GO: Cellular Component	GO:0030139	endocytic vesicle		1.905e-07	2.556e-06	24	265	HSP90B1,UBA52,HPX,HSP90AA1,HYOU1,ANXA3,WNT7A,ANXA11,APOA1,IGF2R,MYO6,B2M,RAB11A,RAB10,RAB7A,KIF5B,DPP4,CALR,LAMP1,LAMP2,SYT7,TF,CD9,LTF
GO: Cellular Component	GO:0001669	acrosomal vesicle		3.175e-07	4.173e-06	15	113	HEXB,ACR,PLA1A,ARSA,CTSH,SPINK2,ACRBP,PATE4,TEX101,RAB3A,CALR,PDIA3,CCT6A,SERPINA5,SPACA3
GO: Cellular Component	GO:0005839	proteasome core complex		5.188e-07	6.682e-06	7	20	PSMA2,PSMA4,PSMA5,PSMA6,PSMB1,PSMB2,PSMB3
GO: Cellular Component	GO:0030667	secretory granule membrane		6.364e-07	8.036e-06	13	89	ACTN1,PLA1A,ANXA7,APLP2,CPE,TEX101,RAB27A,RAB27B,CA4,LAMP2,CD9,SERPINA5,SPACA3
GO: Cellular Component	GO:0044440	endosomal part		6.829e-07	8.458e-06	31	434	TSG101,UBA52,UBA1,MVB12A,PIGR,ITM2B,ANXA1,ANXA2,VPS25,APP,ZFYVE28,RAB21,CTSB,CTSH,CTSL,B2M,RAB11A,STEAP2,TMBIM1,RAB10,RAB7A,RAB27A,RAB27B,VPS37C,LAMP1,LAMP2,VPS37B,TF,CD14,LNPEP,VPS28
GO: Cellular Component	GO:0042581	specific granule		8.612e-07	1.046e-05	6	14	CRISP3,ANXA3,ANXA11,OLFM4,CAMP,LTF
GO: Cellular Component	GO:0031225	anchored component of membrane		1.321e-06	1.575e-05	17	160	CD109,CP,CPM,LYPD3,PRSS8,GGT1,TEX101,CA4,GP2,GPC1,CD177,PSCA,CD14,LPL,CD59,LSAMP,MSLN
GO: Cellular Component	GO:0000813	ESCRT I complex		1.506e-06	1.742e-05	5	9	TSG101,MVB12A,VPS37C,VPS37B,VPS28
GO: Cellular Component	GO:0043005	neuron projection		1.515e-06	1.742e-05	60	1194	PARK7,SERPINF1,ACTB,ACTN1,PFN1,TXN,TUBB4A,CLU,BASP1,MME,BAIAP2,MLPH,HSPA8,HSPB1,HSP90AA1,ANG,ANXA3,ANXA5,CPE,APOD,APP,YWHAE,ARF4,CST3,DNAJC5,RAB21,PTGES3,IL6ST,SOD1,IMPA1,MYO6,SPOCK1,GARS,RAB11A,NAP1L1,GC,IQGAP1,PTPRF,REEP6,RAB7A,PYGB,KIF5B,GNB1,RAB3A,RAB27A,GOT1,CA2,NOV,GPI,CALM1,LAMP1,CRTAC1,SYT7,TIMP2,PEBP1,EIF5A,CDC42,CDH1,ENO1,AGRN
GO: Cellular Component	GO:0005770	late endosome		2.483e-06	2.805e-05	20	224	ACPP,TSG101,MVB12A,HSPA8,ANXA2,IGF2R,CST3,CHID1,CTSH,LGMN,RAB11A,RAB7A,RAB27A,RAB27B,VPS37C,LAMP1,LAMP2,VPS37B,TF,VPS28
GO: Cellular Component	GO:0030133	transport vesicle		2.947e-06	3.272e-05	27	374	SERPINA1,PIGR,MME,HSPA8,ANXA5,RAB3D,CPE,APP,IGF2R,DNAJC5,CTSZ,B2M,RAB11A,DBI,STEAP2,RAB3A,RAB3B,RAB27A,RAB27B,CA4,CRISPLD2,LAMP1,SYT7,PEBP1,CD59,SYTL1,LYZ
GO: Cellular Component	GO:0005783	endoplasmic reticulum		5.289e-06	5.773e-05	76	1706	HSP90B1,ACO1,ESD,PARK7,DNAJB9,ADAM10,SERPINA1,UBA1,CPQ,CLU,CLN5,TXNDC16,PLA2G2A,ALB,PLOD1,HSPA5,SDCBP,VCP,COL6A2,SUMF2,COL12A1,VTN,HYOU1,WNT7A,ANXA5,ANXA7,AGR2,APOA1,ST6GAL1,NPC2,MINPP1,APOD,APP,CLSTN1,PPIB,ARSA,RNASET2,CST3,RAB21,DNAJC3,CTSZ,ERAP1,B2M,DBI,PTGDS,HSPA13,PTN,QSOX1,RAB10,CANT1,REEP6,OS9,RAB1A,RAB2A,CA4,DPP4,CACNA2D1,PLOD3,PDCD6IP,PDCD6,CALR,NUCB1,NCSTN,TMBIM6,PDIA3,SIL1,TGFBR3,COL18…
GO: Cellular Component	GO:0005790	smooth endoplasmic reticulum		7.057e-06	7.496e-05	8	39	HSP90B1,HSPA5,HYOU1,APP,PPIB,DNAJC3,CALR,PDIA3
GO: Cellular Component	GO:0098552	side of membrane		7.1e-06	7.496e-05	32	510	IGLL5,HSPA8,EZR,ANPEP,ANXA1,ANXA5,ARSA,RAB21,CTSB,IL6ST,B2M,ACE,GGT1,IQGAP1,B4GALT1,GM2A,GNB1,GNB2,CA4,CALR,NUCB1,LAMP1,TF,TGFBR3,THBS1,CD9,CD14,P4HB,CD59,IL1RL1,CDH1,SERPINA5
GO: Cellular Component	GO:0097458	neuron part		7.457e-06	7.746e-05	70	1545	PARK7,SERPINF1,ACTB,ACTN1,PFN1,TXN,TUBB4A,CLU,BASP1,MME,BAIAP2,MLPH,PLS3,HSPA8,HSPB1,HSP90AA1,ANG,ANXA3,WNT7A,ANXA5,CPE,APOD,APP,CLSTN1,YWHAE,ARF4,CST3,DNAJC5,RAB21,PTGES3,IL6ST,SOD1,IMPA1,MYO6,SPOCK1,GARS,RAB11A,NAP1L1,GC,DBI,IQGAP1,PTPRF,REEP6,BTD,RAB7A,PYGB,KIF5B,GNB1,RAB1A,RAB2A,RAB3A,RAB3B,RAB27A,GOT1,CA2,NOV,GPC1,GPI,CALM1,LAMP1,CRTAC1,SYT7,TIMP2,PEBP1,EIF5A,SYTL1,CDC42,CDH1,ENO1,AGRN
GO: Cellular Component	GO:0034663	endoplasmic reticulum chaperone complex		8.858e-06	9.054e-05	5	12	HSP90B1,HSPA5,HYOU1,PPIB,P4HB
GO: Cellular Component	GO:0030424	axon		9.653e-06	9.714e-05	34	567	PARK7,SERPINF1,ACTB,TXN,TUBB4A,MME,HSPA8,HSPB1,ANXA3,ANXA5,APP,YWHAE,CST3,DNAJC5,RAB21,SOD1,IMPA1,MYO6,SPOCK1,GARS,RAB11A,GC,IQGAP1,RAB7A,PYGB,KIF5B,RAB3A,GOT1,CA2,NOV,SYT7,PEBP1,CDH1,AGRN
GO: Cellular Component	GO:0009897	external side of plasma membrane		1.024e-05	0.0001014	23	310	IGLL5,ANPEP,ANXA1,ANXA5,ARSA,CTSB,IL6ST,B2M,ACE,GGT1,B4GALT1,CA4,CALR,LAMP1,TF,TGFBR3,THBS1,CD9,CD14,P4HB,CD59,IL1RL1,SERPINA5
GO: Cellular Component	GO:0043260	laminin-11 complex		1.923e-05	0.0001877	3	3	LAMA5,LAMB2,LAMC1
GO: Cellular Component	GO:0044297	cell body		2.058e-05	0.0001978	38	691	PARK7,SERPINF1,ACTG2,TXN,TUBB4A,BAIAP2,HSPA8,NAXE,HSPB1,HSP90AA1,EZR,ANG,ANXA3,ANXA5,CCT2,CPE,APOD,CCT5,CST3,PTGES3,IL6ST,SOD1,IMPA1,MYO6,PTPRF,BTD,GNB1,GNB2,RAB1A,RAB2A,NOV,GPC1,LAMP1,CCT6A,TIMP2,PEBP1,EIF5A,CDC42
GO: Cellular Component	GO:0005605	basal lamina		2.361e-05	0.0002236	6	23	ANG,FN1,LAMA5,LAMB2,LAMC1,AGRN
GO: Cellular Component	GO:0005771	multivesicular body		2.542e-05	0.0002372	8	46	ACPP,TSG101,CST3,CTSH,RAB11A,RAB27A,RAB27B,LAMP1
GO: Cellular Component	GO:0010008	endosome membrane		2.713e-05	0.0002496	26	399	TSG101,UBA52,UBA1,MVB12A,PIGR,ITM2B,ANXA1,ANXA2,VPS25,ZFYVE28,RAB21,B2M,RAB11A,STEAP2,TMBIM1,RAB10,RAB7A,RAB27A,RAB27B,VPS37C,LAMP1,LAMP2,VPS37B,TF,CD14,VPS28
GO: Cellular Component	GO:0019773	proteasome core complex, alpha-subunit complex		3.181e-05	0.0002885	4	8	PSMA2,PSMA4,PSMA5,PSMA6
GO: Cellular Component	GO:0005791	rough endoplasmic reticulum		3.256e-05	0.0002913	11	92	UBA1,PLOD1,VTN,APP,DNAJC3,PTGDS,CA4,PLOD3,NUCB1,PEBP1,LYZ
GO: Cellular Component	GO:0044431	Golgi apparatus part		3.818e-05	0.0003368	46	928	MAN2A1,ACR,ACPP,ADAM10,B4GALT5,SERPINA1,ITM2B,VTN,FMOD,WNT7A,ST6GAL1,CPD,APP,CLSTN1,RAB6B,ARF3,IGF2R,CHID1,FUT5,RAB21,MUC6,CTSZ,SOD3,B2M,RAB11A,GNPTG,STEAP2,B4GALT1,QSOX1,RAB10,CANT1,GLG1,RAB1A,RAB2A,RAB27B,CA4,DOPEY2,GPC1,NUCB1,STEAP4,MUC5B,CD59,LYZ,CDC42,CDH1,AGRN
GO: Cellular Component	GO:0005903	brush border		4.057e-05	0.000353	13	129	ACTN1,CLIC1,MME,VCL,HSP90AA1,HSP90AB1,EZR,MYL6,MYO6,ACE,B4GALT1,CA4,CAPZA1
GO: Cellular Component	GO:0036452	ESCRT complex		5.031e-05	0.0004178	6	26	TSG101,MVB12A,VPS25,VPS37C,VPS37B,VPS28
GO: Cellular Component	GO:0031904	endosome lumen		5.031e-05	0.0004178	6	26	APP,CTSB,CTSH,CTSL,B2M,LNPEP
GO: Cellular Component	GO:0098857	membrane microdomain		5.06e-05	0.0004178	23	343	PARK7,PGK1,HSPA8,SDCBP,VCL,EZR,ANXA2,CPE,APP,PRKAR2A,CTSB,CTSD,PRSS8,IQGAP1,TEX101,GPC1,DPP4,RAP1B,LAMP2,LDHB,EEF2,CD14,CDH1
GO: Cellular Component	GO:0045121	membrane raft		5.06e-05	0.0004178	23	343	PARK7,PGK1,HSPA8,SDCBP,VCL,EZR,ANXA2,CPE,APP,PRKAR2A,CTSB,CTSD,PRSS8,IQGAP1,TEX101,GPC1,DPP4,RAP1B,LAMP2,LDHB,EEF2,CD14,CDH1
GO: Cellular Component	GO:0042383	sarcolemma		5.638e-05	0.0004596	14	152	VCL,EZR,COL6A2,ANXA1,ANXA2,ANXA5,SLC2A5,PRKAR2A,CTSB,CA4,CACNA2D1,LAMP1,CD59,AGRN
GO: Cellular Component	GO:0098589	membrane region		6.899e-05	0.0005554	57	1267	CFL1,PARK7,AKR1A1,PGK1,PIP,HSPA1A,HSPA8,SDCBP,HSPB1,VCL,HSP90AA1,HSP90AB1,EZR,FN1,ANXA1,ANXA2,ANXA4,CPE,APP,CLSTN1,SLC2A5,ARF4,PRKAR2A,CTSB,CTSD,ATP6V1A,PRSS8,MYO6,ACE,IQGAP1,B4GALT1,GLRA2,TEX101,GNB1,RAB27A,RAB27B,CA2,CA4,GP2,GPC1,GPI,DPP4,RAP1B,LAMP2,LCP1,LDHB,SYT7,TF,PDIA3,EEF2,CD9,CD14,ADGRG2,EIF5A,CD81,CDH1,ENO1
GO: Cellular Component	GO:0016324	apical plasma membrane		9.949e-05	0.000791	22	335	AKR1A1,PIP,HSPA1A,HSP90AA1,HSP90AB1,EZR,FN1,ANXA1,ANXA4,SLC2A5,CTSB,ATP6V1A,RAB27A,RAB27B,CA4,GP2,DPP4,TF,PDIA3,CD9,ADGRG2,CD81
GO: Cellular Component	GO:0005739	mitochondrion		0.000103	0.000809	73	1769	RIDA,AARS,DDAH1,ACAT2,HEBP2,ACLY,ACO1,PARK7,MDH1,TXN,CKB,ADH5,FASN,UBA1,CLU,CLIC1,TPP1,PKM,MMP2,FH,PRDX5,ALDOA,HSPA1A,HSPA2,HSPA5,NAXE,HSP90AB1,ANXA1,AGR2,OLFM4,RAB3D,VPS25,IDH1,YWHAB,YWHAE,YWHAG,YWHAH,YWHAZ,PRDX6,DHX30,AKR7A2,PPP2R1A,CRYM,DNAJC5,RAI14,CTSB,CTSD,SOD1,SORD,ATP6V1A,PSAP,GAPDH,SPR,GARS,PSMB3,RAB11A,DBI,BTD,GM2A,YWHAQ,NME2,GOT1,SFN,PTCD3,GLOD4,PRDX2,TMBIM6,LDHA,LDHB,PDIA3,GSTP1,PEBP1…
GO: Cellular Component	GO:0045335	phagocytic vesicle		0.0001142	0.0008865	10	88	ANXA3,ANXA11,B2M,RAB11A,RAB10,RAB7A,LAMP1,LAMP2,SYT7,LTF
GO: Cellular Component	GO:0005793	endoplasmic reticulum-Golgi intermediate compartment		0.0001206	0.0009248	11	106	SERPINA1,HSPA5,FN1,ANPEP,RAB6B,CTSZ,RAB2A,CA4,NUCB1,P4HB,CD59
GO: Cellular Component	GO:0098791	Golgi subcompartment		0.0001856	0.001407	21	326	ACPP,ADAM10,B4GALT5,ST6GAL1,CPD,APP,IGF2R,CHID1,FUT5,RAB21,SOD3,RAB11A,B4GALT1,RAB10,CANT1,GLG1,RAB27B,CA4,NUCB1,LYZ,CDH1
GO: Cellular Component	GO:0046658	anchored component of plasma membrane		0.0002261	0.001681	7	47	CP,LYPD3,PRSS8,GGT1,CA4,CD14,CD59
GO: Cellular Component	GO:0044432	endoplasmic reticulum part		0.0002271	0.001681	52	1177	HSP90B1,ESD,DNAJB9,ADAM10,SERPINA1,UBA1,TXNDC16,PLA2G2A,PLOD1,HSPA5,SDCBP,VCP,COL6A2,SUMF2,COL12A1,VTN,HYOU1,WNT7A,ANXA7,APOA1,MINPP1,CLSTN1,PPIB,ARSA,RNASET2,RAB21,DNAJC3,CTSZ,ERAP1,B2M,DBI,PTGDS,RAB10,CANT1,REEP6,OS9,RAB1A,RAB2A,PLOD3,PDCD6IP,PDCD6,CALR,TMBIM6,PDIA3,SIL1,COL18A1,THBS1,P4HB,EIF5A,CD59,LYZ,CDC42
GO: Cellular Component	GO:0098862	cluster of actin-based cell projections		0.000253	0.001852	14	175	ACTN1,CLIC1,MME,PLS3,VCL,HSP90AA1,HSP90AB1,EZR,MYL6,MYO6,ACE,B4GALT1,CA4,CAPZA1
GO: Cellular Component	GO:0030863	cortical cytoskeleton		0.0002573	0.001862	10	97	CFL1,ACTB,ACTN1,MLPH,VCL,CAP1,EZR,CAPZA1,GSN,CDH1
GO: Cellular Component	GO:0044448	cell cortex part		0.0003227	0.002309	12	138	CFL1,ACTB,ACTN1,MLPH,VCL,CAP1,EZR,RAB10,GM2A,CAPZA1,GSN,CDH1
GO: Cellular Component	GO:0031985	Golgi cisterna		0.00033	0.002335	10	100	ACPP,B4GALT5,ST6GAL1,FUT5,RAB21,B4GALT1,CANT1,GLG1,NUCB1,LYZ
GO: Cellular Component	GO:0031984	organelle subcompartment		0.0003408	0.002385	21	341	ACPP,ADAM10,B4GALT5,ST6GAL1,CPD,APP,IGF2R,CHID1,FUT5,RAB21,SOD3,RAB11A,B4GALT1,RAB10,CANT1,GLG1,RAB27B,CA4,NUCB1,LYZ,CDH1
GO: Cellular Component	GO:0098858	actin-based cell projection		0.0003839	0.002658	15	204	ACPP,ACTG2,BAIAP2,PLS3,EZR,APP,ATP6V1A,MYO6,STARD10,B4GALT1,CA2,LCP1,CBR1,LYZ,CDC42
GO: Cellular Component	GO:0001726	ruffle		0.0006051	0.004145	13	169	CFL1,ACTN1,S100A11,BAIAP2,HSP90AA1,EZR,ANXA2,ARF4,MYO6,IQGAP1,NME2,LCP1,GSN
GO: Cellular Component	GO:0031902	late endosome membrane		0.0006114	0.004145	10	108	TSG101,MVB12A,ANXA2,RAB7A,RAB27A,RAB27B,VPS37C,LAMP2,VPS37B,VPS28
GO: Cellular Component	GO:0031045	dense core granule		0.0006979	0.004682	4	16	ACTN1,CPE,SOD1,SYT7
GO: Cellular Component	GO:0032311	angiogenin-PRI complex		0.0007259	0.00477	2	2	ANG,RNH1
GO: Cellular Component	GO:1990836	lysosomal matrix		0.0007259	0.00477	2	2	HSPA8,LAMP2
GO: Cellular Component	GO:0030135	coated vesicle		0.0007635	0.004966	16	241	SERPINA1,HSPA8,APP,IGF2R,DNAJC5,CTSZ,MYO6,B2M,STEAP2,RAB3A,RAB27A,RAB27B,TF,CD9,CD59,LYZ
GO: Cellular Component	GO:0005795	Golgi stack		0.0008101	0.005168	11	132	ACPP,B4GALT5,ST6GAL1,FUT5,RAB21,B4GALT1,CANT1,GLG1,RAB27B,NUCB1,LYZ
GO: Cellular Component	GO:0005938	cell cortex		0.0008106	0.005168	17	266	CFL1,ACTB,ACTN1,PFN1,MLPH,VCL,CAP1,EZR,ANXA2,RAI14,MYO6,RAB10,GM2A,ITCH,CAPZA1,GSN,CDH1
GO: Cellular Component	GO:0043256	laminin complex		0.0009482	0.005871	3	8	LAMA5,LAMB2,LAMC1
GO: Cellular Component	GO:0061202	clathrin-sculpted gamma-aminobutyric acid transport vesicle membrane		0.0009482	0.005871	3	8	HSPA8,DNAJC5,RAB3A
GO: Cellular Component	GO:0061200	clathrin-sculpted gamma-aminobutyric acid transport vesicle		0.0009482	0.005871	3	8	HSPA8,DNAJC5,RAB3A
GO: Cellular Component	GO:0030670	phagocytic vesicle membrane		0.001032	0.006328	7	60	ANXA3,B2M,RAB10,RAB7A,LAMP1,LAMP2,SYT7
GO: Cellular Component	GO:0042582	azurophil granule		0.001125	0.006771	4	18	HEXA,HEXB,ANXA11,OLFM4
GO: Cellular Component	GO:0005766	primary lysosome		0.001125	0.006771	4	18	HEXA,HEXB,ANXA11,OLFM4
GO: Cellular Component	GO:0099568	cytoplasmic region		0.001192	0.00711	19	325	CFL1,ACTB,ACTN1,PFN1,MLPH,VCL,CAP1,EZR,ANXA2,RAI14,RAB21,SOD1,MYO6,RAB10,GM2A,ITCH,CAPZA1,GSN,CDH1
GO: Cellular Component	GO:0005577	fibrinogen complex		0.001394	0.007952	3	9	SERPINF2,FN1,THBS1
GO: Cellular Component	GO:0031232	extrinsic component of external side of plasma membrane		0.001394	0.007952	3	9	ANXA1,ARSA,TF
GO: Cellular Component	GO:0005832	chaperonin-containing T-complex		0.001394	0.007952	3	9	CCT2,CCT5,CCT6A
GO: Cellular Component	GO:0097208	alveolar lamellar body		0.001394	0.007952	3	9	CTSH,RAB7A,LAMP1
GO: Cellular Component	GO:0043218	compact myelin		0.001395	0.007952	4	19	ANXA2,MPP5,CD59,CDH1
GO: Cellular Component	GO:0042599	lamellar body		0.001708	0.009647	4	20	SMPD1,CTSH,RAB7A,LAMP1
GO: Cellular Component	GO:0044463	cell projection part		0.001891	0.01059	47	1139	CFL1,SERPINF1,ACTN1,TUBB4A,CLU,BASP1,MME,BAIAP2,ALDOA,HSPA8,HSP90AA1,HSP90AB1,EZR,ANG,ANXA5,APP,CLSTN1,ARF4,PRKAR2A,DNAJC5,RAB21,CTSH,SOD1,MYO6,SPOCK1,ACE,IQGAP1,B4GALT1,PTPRF,RAB7A,KIF5B,GNB1,RAB3A,GOT1,CA4,GPI,DPP4,CALM1,CRTAC1,LCP1,LDHA,SYT7,GSTM3,TIMP2,PEBP1,CDH1,AGRN
GO: Cellular Component	GO:0005798	Golgi-associated vesicle		0.002047	0.01136	8	86	ACR,ADAM10,ITM2B,IGF2R,STEAP2,RAB27B,NUCB1,LYZ
GO: Cellular Component	GO:0030867	rough endoplasmic reticulum membrane		0.002066	0.01136	4	21	UBA1,PLOD1,DNAJC3,PLOD3
GO: Cellular Component	GO:0043259	laminin-10 complex		0.002082	0.01136	2	3	LAMA5,LAMC1
GO: Cellular Component	GO:0030864	cortical actin cytoskeleton		0.002159	0.01169	7	68	CFL1,ACTN1,MLPH,VCL,CAP1,GSN,CDH1
GO: Cellular Component	GO:0070382	exocytic vesicle		0.002231	0.01197	12	172	MME,HSPA8,ANXA5,DNAJC5,DBI,RAB3A,RAB3B,RAB27A,LAMP1,SYT7,PEBP1,SYTL1
GO: Cellular Component	GO:0043025	neuronal cell body		0.002252	0.01199	29	616	SERPINF1,TXN,TUBB4A,BAIAP2,HSPA8,HSPB1,HSP90AA1,ANG,ANXA3,ANXA5,CPE,APOD,CST3,PTGES3,IL6ST,SOD1,IMPA1,MYO6,PTPRF,BTD,RAB1A,RAB2A,NOV,GPC1,LAMP1,TIMP2,PEBP1,EIF5A,CDC42
GO: Cellular Component	GO:0019897	extrinsic component of plasma membrane		0.002526	0.01333	11	152	ANXA1,ANXA2,ARSA,PRSS8,IQGAP1,GNB1,GNB2,TF,SYTL1,CDH1,ENO1
GO: Cellular Component	GO:0002199	zona pellucida receptor complex		0.002632	0.01378	3	11	CCT2,CCT5,CCT6A
GO: Cellular Component	GO:0031362	anchored component of external side of plasma membrane		0.00293	0.01522	4	23	GGT1,CA4,CD14,CD59
GO: Cellular Component	GO:0031514	motile cilium		0.002963	0.01527	10	133	ALDOA,HSP90AA1,ANXA1,CTSH,SORD,STARD10,ACE,LDHA,LDHC,GSTM3
GO: Cellular Component	GO:0036477	somatodendritic compartment		0.003268	0.0167	37	867	SERPINF1,ACTN1,TXN,TUBB4A,CLU,MME,BAIAP2,MLPH,HSPA8,HSPB1,HSP90AA1,ANG,ANXA3,ANXA5,CPE,APOD,APP,ARF4,CST3,PTGES3,IL6ST,SOD1,IMPA1,MYO6,PTPRF,BTD,GNB1,RAB1A,RAB2A,RAB27A,NOV,GPC1,LAMP1,TIMP2,PEBP1,EIF5A,CDC42
GO: Cellular Component	GO:0005641	nuclear envelope lumen		0.00344	0.0168	3	12	APP,IGF2R,FAM3B
GO: Cellular Component	GO:0035686	sperm fibrous sheath		0.00344	0.0168	3	12	ALDOA,LDHA,GSTM3
GO: Cellular Component	GO:0060198	clathrin-sculpted vesicle		0.00344	0.0168	3	12	HSPA8,DNAJC5,RAB3A
GO: Cellular Component	GO:0008540	proteasome regulatory particle, base subcomplex		0.00344	0.0168	3	12	PSMC3,PSMC4,PSMD5
GO: Cellular Component	GO:0002080	acrosomal membrane		0.003444	0.0168	4	24	PLA1A,TEX101,SERPINA5,SPACA3
GO: Cellular Component	GO:0022624	proteasome accessory complex		0.003444	0.0168	4	24	PSMC3,PSMC4,PSMD5,PSME1
GO: Cellular Component	GO:0016234	inclusion body		0.003499	0.01694	7	74	MVB12A,CLU,HSPA1A,HSP90AB1,PSMC4,EEF2,CDH1
GO: Cellular Component	GO:0005884	actin filament		0.003573	0.01717	8	94	ACTN1,VCL,EZR,PTGES3,MYO6,IQGAP1,CORO1B,LCP1
GO: Cellular Component	GO:0032580	Golgi cisterna membrane		0.003773	0.018	7	75	B4GALT5,ST6GAL1,FUT5,RAB21,B4GALT1,CANT1,NUCB1
GO: Cellular Component	GO:0033267	axon part		0.003944	0.01867	17	309	SERPINF1,TUBB4A,HSPA8,ANXA5,APP,DNAJC5,RAB21,SOD1,SPOCK1,RAB7A,KIF5B,RAB3A,GOT1,SYT7,PEBP1,CDH1,AGRN
GO: Cellular Component	GO:0031252	cell leading edge		0.004006	0.01867	20	389	CFL1,ACTG2,ACTN1,S100A11,BAIAP2,HSP90AA1,EZR,ANXA2,APP,YWHAZ,ARF4,MYO6,IQGAP1,NME2,DPP4,CORO1B,LCP1,GSN,CDC42,CDH1
GO: Cellular Component	GO:0005796	Golgi lumen		0.004066	0.01867	8	96	VTN,FMOD,WNT7A,MUC6,SOD3,GPC1,MUC5B,AGRN
GO: Cellular Component	GO:0036021	endolysosome lumen		0.004089	0.01867	2	4	CTSB,CTSL
GO: Cellular Component	GO:0097524	sperm plasma membrane		0.004089	0.01867	2	4	HSP90AA1,HSP90AB1
GO: Cellular Component	GO:0031905	early endosome lumen		0.004089	0.01867	2	4	B2M,LNPEP
GO: Cellular Component	GO:0042627	chylomicron		0.004385	0.01989	3	13	APOA1,APOH,LPL
GO: Cellular Component	GO:0030057	desmosome		0.004646	0.02092	4	26	UBA1,VCL,B4GALT1,DSC2
GO: Cellular Component	GO:0030175	filopodium		0.005862	0.02622	8	102	ACPP,ACTG2,BAIAP2,EZR,APP,B4GALT1,LCP1,CDC42
GO: Cellular Component	GO:0042824	MHC class I peptide loading complex		0.006695	0.02938	2	5	CALR,PDIA3
GO: Cellular Component	GO:0048237	rough endoplasmic reticulum lumen		0.006695	0.02938	2	5	VTN,LYZ
GO: Cellular Component	GO:0043220	Schmidt-Lanterman incisure		0.006706	0.02938	3	15	ANXA2,MPP5,CDH1
GO: Cellular Component	GO:0031233	intrinsic component of external side of plasma membrane		0.006933	0.03017	4	29	GGT1,CA4,CD14,CD59
GO: Cellular Component	GO:0019898	extrinsic component of membrane		0.007776	0.03361	15	278	ALOX15B,EZR,ANXA1,ANXA2,ARSA,PRSS8,IQGAP1,RAB7A,GNB1,GNB2,NUCB1,TF,SYTL1,CDH1,ENO1
GO: Cellular Component	GO:0030140	trans-Golgi network transport vesicle		0.007834	0.03363	4	30	IGF2R,STEAP2,RAB27B,LYZ
GO: Cellular Component	GO:0005911	cell-cell junction		0.008656	0.03672	20	418	AOC1,CFL1,ACTN1,UBA1,VCL,ANXA5,APP,YWHAH,STARD10,IQGAP1,B4GALT1,F11R,NOV,DPP4,RAP1B,DSC2,CAPZA1,MPP5,CDC42,CDH1
GO: Cellular Component	GO:0001725	stress fiber		0.008723	0.03672	6	67	ACTN1,MLPH,VCL,ANXA2,CORO1B,LCP1
GO: Cellular Component	GO:0097517	contractile actin filament bundle		0.008723	0.03672	6	67	ACTN1,MLPH,VCL,ANXA2,CORO1B,LCP1
GO: Cellular Component	GO:0015629	actin cytoskeleton		0.008938	0.03716	22	476	CFL1,ACTG2,ACTN1,PGM1,BAIAP2,ALDOA,MLPH,VCL,CAP1,EZR,ANXA2,RAI14,PTGES3,MYL6,MYO6,PSMB3,IQGAP1,CAPZA1,CORO1B,LCP1,GSN,CDH1
GO: Cellular Component	GO:0030666	endocytic vesicle membrane		0.009002	0.03716	10	156	UBA52,ANXA3,WNT7A,B2M,RAB10,RAB7A,LAMP1,LAMP2,SYT7,CD9
GO: Cellular Component	GO:0008021	synaptic vesicle		0.009002	0.03716	10	156	MME,HSPA8,ANXA5,DNAJC5,DBI,RAB3A,RAB3B,LAMP1,SYT7,PEBP1
GO: Cellular Component	GO:0005902	microvillus		0.009552	0.03918	7	89	EZR,ATP6V1A,MYO6,STARD10,CA2,CBR1,LYZ
GO: Cellular Component	GO:0030426	growth cone		0.009641	0.0393	11	182	CLU,BASP1,ANG,APP,IQGAP1,PTPRF,KIF5B,CALM1,CRTAC1,TIMP2,AGRN
GO: Cellular Component	GO:0035749	myelin sheath adaxonal region		0.009866	0.03996	2	6	ANXA2,MPP5
GO: Cellular Component	GO:0030136	clathrin-coated vesicle		0.01155	0.04649	10	162	HSPA8,IGF2R,DNAJC5,MYO6,STEAP2,RAB3A,RAB27A,RAB27B,CD9,LYZ
GO: Cellular Component	GO:0030427	site of polarized growth		0.01165	0.04662	11	187	CLU,BASP1,ANG,APP,IQGAP1,PTPRF,KIF5B,CALM1,CRTAC1,TIMP2,AGRN
GO: Cellular Component	GO:0008180	COP9 signalosome		0.0122	0.04849	4	34	BASP1,HSPA5,HSPA6,HSP90AB1
GO: Cellular Component	GO:0098590	plasma membrane region		0.01268	0.05012	40	1041	CFL1,AKR1A1,PIP,HSPA1A,HSPB1,HSP90AA1,HSP90AB1,EZR,FN1,ANXA1,ANXA2,ANXA4,CPE,CLSTN1,SLC2A5,ARF4,PRKAR2A,CTSB,ATP6V1A,MYO6,ACE,B4GALT1,GLRA2,GNB1,RAB27A,RAB27B,CA2,CA4,GP2,GPI,DPP4,LCP1,SYT7,TF,PDIA3,CD9,ADGRG2,CD81,CDH1,ENO1
GO: Cellular Component	GO:0032432	actin filament bundle		0.01304	0.05119	6	73	ACTN1,MLPH,VCL,ANXA2,CORO1B,LCP1
GO: Cellular Component	GO:0005802	trans-Golgi network		0.01319	0.05147	12	216	ADAM10,CPD,APP,IGF2R,CHID1,RAB21,SOD3,RAB11A,RAB10,CA4,NUCB1,CDH1
GO: Cellular Component	GO:0016235	aggresome		0.01349	0.05171	4	35	MVB12A,CLU,EEF2,CDH1
GO: Cellular Component	GO:0043219	lateral loop		0.01357	0.05171	2	7	MPP5,CDH1
GO: Cellular Component	GO:0097433	dense body		0.01357	0.05171	2	7	ACTB,TF
GO: Cellular Component	GO:0000138	Golgi trans cisterna		0.01357	0.05171	2	7	ST6GAL1,B4GALT1
GO: Cellular Component	GO:0042579	microbody		0.01378	0.05189	9	142	EPHX2,RIDA,AOC1,PRDX5,IDH1,CRYM,SOD1,SYT7,PRDX1
GO: Cellular Component	GO:0005777	peroxisome		0.01378	0.05189	9	142	EPHX2,RIDA,AOC1,PRDX5,IDH1,CRYM,SOD1,SYT7,PRDX1
GO: Cellular Component	GO:0016528	sarcoplasm		0.01388	0.05196	6	74	SPOCK1,CA4,CACNA2D1,CALR,GSN,THBS1
GO: Cellular Component	GO:0034385	triglyceride-rich plasma lipoprotein particle		0.01523	0.05637	3	20	APOA1,APOH,LPL
GO: Cellular Component	GO:0034361	very-low-density lipoprotein particle		0.01523	0.05637	3	20	APOA1,APOH,LPL
GO: Cellular Component	GO:0045202	synapse		0.01649	0.0605	34	870	PARK7,ACTB,ACTN1,PFN1,ADAM10,SPARCL1,MME,BAIAP2,HSPA8,HSPB1,WNT7A,ANXA5,CPE,APP,CLSTN1,YWHAZ,ARF4,DNAJC5,MYO6,SPOCK1,DBI,PTN,PTPRF,GLRA2,RAB7A,RAB3A,RAB3B,LAMB2,LAMP1,SYT7,PEBP1,SYTL1,ENO1,AGRN
GO: Cellular Component	GO:0042641	actomyosin		0.01663	0.0605	6	77	ACTN1,MLPH,VCL,ANXA2,CORO1B,LCP1
GO: Cellular Component	GO:0036126	sperm flagellum		0.01663	0.0605	6	77	ALDOA,HSP90AA1,CTSH,ACE,LDHA,GSTM3
GO: Cellular Component	GO:0005838	proteasome regulatory particle		0.01742	0.06126	3	21	PSMC3,PSMC4,PSMD5
GO: Cellular Component	GO:0036056	filtration diaphragm		0.01778	0.06126	2	8	IQGAP1,F11R
GO: Cellular Component	GO:0031595	nuclear proteasome complex		0.01778	0.06126	2	8	PSMC3,PSMC4
GO: Cellular Component	GO:0000306	extrinsic component of vacuolar membrane		0.01778	0.06126	2	8	ANXA1,RAB7A
GO: Cellular Component	GO:0016461	unconventional myosin complex		0.01778	0.06126	2	8	MYL6,MYO6
GO: Cellular Component	GO:0034366	spherical high-density lipoprotein particle		0.01778	0.06126	2	8	CLU,APOA1
GO: Cellular Component	GO:0036057	slit diaphragm		0.01778	0.06126	2	8	IQGAP1,F11R
GO: Cellular Component	GO:0042587	glycogen granule		0.01778	0.06126	2	8	FASN,PPP1CB
GO: Cellular Component	GO:1990712	HFE-transferrin receptor complex		0.01778	0.06126	2	8	B2M,TF
GO: Cellular Component	GO:0044306	neuron projection terminus		0.01779	0.06126	11	199	MME,HSPA8,ANXA5,APP,DNAJC5,RAB7A,RAB3A,GOT1,SYT7,PEBP1,CDH1
GO: Cellular Component	GO:0014704	intercalated disc		0.01883	0.0645	5	58	ACTN1,VCL,ANXA5,YWHAH,DSC2
GO: Cellular Component	GO:1990777	lipoprotein particle		0.02123	0.07197	4	40	CLU,APOA1,APOH,LPL
GO: Cellular Component	GO:0034358	plasma lipoprotein particle		0.02123	0.07197	4	40	CLU,APOA1,APOH,LPL
GO: Cellular Component	GO:0005769	early endosome		0.02145	0.07232	15	314	TSG101,LIPG,ANXA1,ANXA2,APOA1,ZFYVE28,IGF2R,RAB21,B2M,STEAP2,RAB1A,NUCB1,TF,LNPEP,VPS28
GO: Cellular Component	GO:0031430	M band		0.02231	0.07417	3	23	ALDOA,HSPB1,ENO1
GO: Cellular Component	GO:0046581	intercellular canaliculus		0.02246	0.07417	2	9	STARD10,DPP4
GO: Cellular Component	GO:0042583	chromaffin granule		0.02246	0.07417	2	9	CLU,ANXA7
GO: Cellular Component	GO:0032585	multivesicular body membrane		0.02246	0.07417	2	9	RAB27A,RAB27B
GO: Cellular Component	GO:0043292	contractile fiber		0.02316	0.07611	12	234	ACTN1,MMP2,ALDOA,HSPB1,VCL,ANXA5,CST3,PSMA6,FBP2,DBI,CALM1,ENO1
GO: Cellular Component	GO:0032587	ruffle membrane		0.02445	0.07844	6	84	CFL1,HSP90AA1,EZR,ARF4,MYO6,LCP1
GO: Cellular Component	GO:0032994	protein-lipid complex		0.02495	0.07844	4	42	CLU,APOA1,APOH,LPL
GO: Cellular Component	GO:0005595	collagen type XII trimer		0.02734	0.07844	1	1	COL12A1
GO: Cellular Component	GO:0036026	protein C inhibitor-PLAT complex		0.02734	0.07844	1	1	SERPINA5
GO: Cellular Component	GO:0097182	protein C inhibitor-coagulation factor Xa complex		0.02734	0.07844	1	1	SERPINA5
GO: Cellular Component	GO:0036029	protein C inhibitor-KLK3 complex		0.02734	0.07844	1	1	SERPINA5
GO: Cellular Component	GO:0097181	protein C inhibitor-coagulation factor V complex		0.02734	0.07844	1	1	SERPINA5
GO: Cellular Component	GO:0097183	protein C inhibitor-coagulation factor XI complex		0.02734	0.07844	1	1	SERPINA5
GO: Cellular Component	GO:0036028	protein C inhibitor-thrombin complex		0.02734	0.07844	1	1	SERPINA5
GO: Cellular Component	GO:0036025	protein C inhibitor-TMPRSS11E complex		0.02734	0.07844	1	1	SERPINA5
GO: Cellular Component	GO:0061474	phagolysosome membrane		0.02734	0.07844	1	1	LAMP1
GO: Cellular Component	GO:0061742	chaperone-mediated autophagy translocation complex		0.02734	0.07844	1	1	LAMP2
GO: Cellular Component	GO:0005895	interleukin-5 receptor complex		0.02734	0.07844	1	1	SDCBP
GO: Cellular Component	GO:0090637	inner dense plaque of desmosome		0.02734	0.07844	1	1	VCL
GO: Cellular Component	GO:0097179	protease inhibitor complex		0.02734	0.07844	1	1	SERPINA5
GO: Cellular Component	GO:0032419	extrinsic component of lysosome membrane		0.02734	0.07844	1	1	RAB7A
GO: Cellular Component	GO:0098547	lumenal side of Golgi membrane		0.02734	0.07844	1	1	NUCB1
GO: Cellular Component	GO:0097180	serine protease inhibitor complex		0.02734	0.07844	1	1	SERPINA5
GO: Cellular Component	GO:1990913	sperm head plasma membrane		0.02734	0.07844	1	1	HSP90AB1
GO: Cellular Component	GO:0036030	protein C inhibitor-plasma kallikrein complex		0.02734	0.07844	1	1	SERPINA5
GO: Cellular Component	GO:0090636	outer dense plaque of desmosome		0.02734	0.07844	1	1	VCL
GO: Cellular Component	GO:0036024	protein C inhibitor-TMPRSS7 complex		0.02734	0.07844	1	1	SERPINA5
GO: Cellular Component	GO:0036027	protein C inhibitor-PLAU complex		0.02734	0.07844	1	1	SERPINA5
GO: Cellular Component	GO:0097013	phagocytic vesicle lumen		0.02734	0.07844	1	1	LTF
GO: Cellular Component	GO:0098839	postsynaptic density membrane		0.02734	0.07844	1	1	HSPB1
GO: Cellular Component	GO:0099634	postsynaptic specialization membrane		0.02734	0.07844	1	1	HSPB1
GO: Cellular Component	GO:1990917	ooplasm		0.02734	0.07844	1	1	HSP90AB1
GO: Cellular Component	GO:0043679	axon terminus		0.02742	0.07844	10	186	HSPA8,ANXA5,APP,DNAJC5,RAB7A,RAB3A,GOT1,SYT7,PEBP1,CDH1
GO: Cellular Component	GO:0005797	Golgi medial cisterna		0.02758	0.07844	2	10	ST6GAL1,GLG1
GO: Cellular Component	GO:0035253	ciliary rootlet		0.02758	0.07844	2	10	APP,KIF5B
GO: Cellular Component	GO:0000139	Golgi membrane		0.02765	0.07844	28	716	MAN2A1,B4GALT5,SERPINA1,ITM2B,ST6GAL1,APP,CLSTN1,RAB6B,ARF3,IGF2R,FUT5,RAB21,CTSZ,B2M,GNPTG,STEAP2,B4GALT1,QSOX1,RAB10,CANT1,GLG1,RAB1A,RAB2A,DOPEY2,NUCB1,STEAP4,CD59,CDC42
GO: Cellular Component	GO:0031526	brush border membrane		0.02923	0.08257	5	65	HSP90AA1,HSP90AB1,ACE,B4GALT1,CA4
GO: Cellular Component	GO:0016323	basolateral plasma membrane		0.03067	0.08626	12	244	HSPA1A,HSP90AA1,HSP90AB1,EZR,ANXA1,ANXA2,ACE,B4GALT1,CA2,CA4,TF,CDH1
GO: Cellular Component	GO:0005811	lipid droplet		0.03276	0.09172	5	67	VCP,ANXA2,GAPDH,RAB7A,RAP1B
GO: Cellular Component	GO:0070971	endoplasmic reticulum exit site		0.03313	0.09196	2	11	PDCD6IP,PDCD6
GO: Cellular Component	GO:0042612	MHC class I protein complex		0.03313	0.09196	2	11	AZGP1,B2M
GO: Cellular Component	GO:0031970	organelle envelope lumen		0.03442	0.09515	6	91	PARK7,APP,IGF2R,SOD1,FAM3B,PDIA3
GO: Cellular Component	GO:0030662	coated vesicle membrane		0.03622	0.09969	8	142	HSPA8,DNAJC5,MYO6,B2M,RAB3A,TF,CD9,CD59
GO: Cellular Component	GO:0034364	high-density lipoprotein particle		0.03745	0.1026	3	28	CLU,APOA1,APOH
GO: Cellular Component	GO:0005782	peroxisomal matrix		0.03836	0.1042	4	48	PRDX5,IDH1,CRYM,PRDX1
GO: Cellular Component	GO:0031907	microbody lumen		0.03836	0.1042	4	48	PRDX5,IDH1,CRYM,PRDX1
GO: Cellular Component	GO:0031597	cytosolic proteasome complex		0.03907	0.1053	2	12	PSMC3,PSMC4
GO: Cellular Component	GO:0030312	external encapsulating structure		0.03907	0.1053	2	12	B4GALT1,CAMP
GO: Cellular Component	GO:0044456	synapse part		0.03934	0.1056	27	708	PARK7,ACTB,ACTN1,ADAM10,MME,BAIAP2,HSPA8,HSPB1,WNT7A,ANXA5,CPE,APP,CLSTN1,YWHAZ,ARF4,DNAJC5,SPOCK1,DBI,GLRA2,RAB7A,RAB3A,RAB3B,LAMP1,SYT7,PEBP1,SYTL1,ENO1
GO: Cellular Component	GO:0030017	sarcomere		0.0395	0.1056	10	198	ACTN1,MMP2,ALDOA,HSPB1,VCL,ANXA5,PSMA6,FBP2,CALM1,ENO1
GO: Cellular Component	GO:0098793	presynapse		0.04012	0.1068	15	341	PARK7,MME,HSPA8,WNT7A,ANXA5,APP,DNAJC5,DBI,RAB7A,RAB3A,RAB3B,LAMP1,SYT7,PEBP1,SYTL1
GO: Cellular Component	GO:0044291	cell-cell contact zone		0.04057	0.1071	5	71	ACTN1,VCL,ANXA5,YWHAH,DSC2
GO: Cellular Component	GO:0030134	COPII-coated ER to Golgi transport vesicle		0.04057	0.1071	5	71	SERPINA1,APP,CTSZ,B2M,CD59
GO: Cellular Component	GO:0005844	polysome		0.04092	0.1076	4	49	MSI1,PSMA6,CALR,EEF2
GO: Cellular Component	GO:0031092	platelet alpha granule membrane		0.04537	0.1178	2	13	APLP2,CD9
GO: Cellular Component	GO:0097449	astrocyte projection		0.04537	0.1178	2	13	EZR,APP
GO: Cellular Component	GO:0005916	fascia adherens		0.04537	0.1178	2	13	ACTN1,VCL
GO: Cellular Component	GO:0031256	leading edge membrane		0.04746	0.1227	8	150	CFL1,HSP90AA1,EZR,ARF4,MYO6,DPP4,LCP1,CDC42
GO: Cellular Component	GO:0035770	ribonucleoprotein granule		0.05058	0.1276	8	152	ACTB,DHX30,PSMA2,PSMA4,PSMA6,PSMC3,IQGAP1,CDC42
GO: Cellular Component	GO:0005929	cilium		0.0515	0.1276	21	537	TUBB4A,PKM,ALDOA,NAXE,HSP90AA1,EZR,ANXA1,APP,PRKAR2A,CTSH,SORD,STARD10,ACE,RAB10,KIF5B,GNB1,RAB27A,GPI,LDHA,LDHC,GSTM3
GO: Cellular Component	GO:1990730	VCP-NSFL1C complex		0.05251	0.1276	1	2	VCP
GO: Cellular Component	GO:0044317	rod spherule		0.05251	0.1276	1	2	REEP6
GO: Cellular Component	GO:0098559	cytoplasmic side of early endosome membrane		0.05251	0.1276	1	2	RAB21
GO: Cellular Component	GO:0098592	cytoplasmic side of apical plasma membrane		0.05251	0.1276	1	2	EZR
GO: Cellular Component	GO:0030112	glycocalyx		0.05251	0.1276	1	2	B4GALT1
GO: Cellular Component	GO:0031372	UBC13-MMS2 complex		0.05251	0.1276	1	2	UBE2V2
GO: Cellular Component	GO:0005900	oncostatin-M receptor complex		0.05251	0.1276	1	2	IL6ST
GO: Cellular Component	GO:0098575	lumenal side of lysosomal membrane		0.05251	0.1276	1	2	HSPA8
GO: Cellular Component	GO:1990667	PCSK9-AnxA2 complex		0.05251	0.1276	1	2	ANXA2
GO: Cellular Component	GO:0005618	cell wall		0.05251	0.1276	1	2	CAMP
GO: Cellular Component	GO:0072563	endothelial microparticle		0.05251	0.1276	1	2	ANXA5
GO: Cellular Component	GO:0097226	sperm mitochondrial sheath		0.05251	0.1276	1	2	HSP90AA1
GO: Cellular Component	GO:0097057	TRAF2-GSTP1 complex		0.05251	0.1276	1	2	GSTP1
GO: Cellular Component	GO:0005889	potassium:proton exchanging ATPase complex		0.05251	0.1276	1	2	GM2A
GO: Cellular Component	GO:0031312	extrinsic component of organelle membrane		0.05665	0.1366	3	33	ANXA1,RAB7A,NUCB1
GO: Cellular Component	GO:0098576	lumenal side of membrane		0.05665	0.1366	3	33	HSPA8,CALR,NUCB1
GO: Cellular Component	GO:0097038	perinuclear endoplasmic reticulum		0.059	0.1418	2	15	ADAM10,DBI
GO: Cellular Component	GO:0044449	contractile fiber part		0.06222	0.149	10	215	ACTN1,MMP2,ALDOA,HSPB1,VCL,ANXA5,PSMA6,FBP2,CALM1,ENO1
GO: Cellular Component	GO:0001772	immunological synapse		0.0654	0.156	3	35	EZR,PDCD6IP,CD81
GO: Cellular Component	GO:0033268	node of Ranvier		0.06627	0.1569	2	16	SPOCK1,CDH1
GO: Cellular Component	GO:0005614	interstitial matrix		0.06627	0.1569	2	16	VWA1,SMOC2
GO: Cellular Component	GO:0030016	myofibril		0.07024	0.1652	10	220	ACTN1,MMP2,ALDOA,HSPB1,VCL,ANXA5,PSMA6,FBP2,CALM1,ENO1
GO: Cellular Component	GO:0030665	clathrin-coated vesicle membrane		0.07027	0.1652	5	83	HSPA8,DNAJC5,MYO6,RAB3A,CD9
GO: Cellular Component	GO:0030496	midbody		0.07354	0.1668	7	137	HSP90B1,HSPA5,ANXA2,ANXA11,IQGAP1,VPS37B,CDC42
GO: Cellular Component	GO:0036019	endolysosome		0.07382	0.1668	2	17	CTSB,CTSL
GO: Cellular Component	GO:1990761	growth cone lamellipodium		0.0777	0.1668	1	3	APP
GO: Cellular Component	GO:0036398	TCR signalosome		0.0777	0.1668	1	3	EZR
GO: Cellular Component	GO:0005608	laminin-3 complex		0.0777	0.1668	1	3	LAMB2
GO: Cellular Component	GO:0060201	clathrin-sculpted acetylcholine transport vesicle membrane		0.0777	0.1668	1	3	RAB3A
GO: Cellular Component	GO:0008537	proteasome activator complex		0.0777	0.1668	1	3	PSME1
GO: Cellular Component	GO:0097454	Schwann cell microvillus		0.0777	0.1668	1	3	EZR
GO: Cellular Component	GO:0031205	endoplasmic reticulum Sec complex		0.0777	0.1668	1	3	DNAJC3
GO: Cellular Component	GO:0005896	interleukin-6 receptor complex		0.0777	0.1668	1	3	IL6ST
GO: Cellular Component	GO:1990812	growth cone filopodium		0.0777	0.1668	1	3	APP
GO: Cellular Component	GO:0005606	laminin-1 complex		0.0777	0.1668	1	3	LAMC1
GO: Cellular Component	GO:0090498	extrinsic component of Golgi membrane		0.0777	0.1668	1	3	NUCB1
GO: Cellular Component	GO:0070110	ciliary neurotrophic factor receptor complex		0.0777	0.1668	1	3	IL6ST
GO: Cellular Component	GO:0034365	discoidal high-density lipoprotein particle		0.0777	0.1668	1	3	APOA1
GO: Cellular Component	GO:0010009	cytoplasmic side of endosome membrane		0.0777	0.1668	1	3	RAB21
GO: Cellular Component	GO:0097512	cardiac myofibril		0.0777	0.1668	1	3	HSPB1
GO: Cellular Component	GO:0043159	acrosomal matrix		0.0777	0.1668	1	3	ACR
GO: Cellular Component	GO:0044393	microspike		0.0777	0.1668	1	3	EZR
GO: Cellular Component	GO:0034673	inhibin-betaglycan-ActRII complex		0.0777	0.1668	1	3	TGFBR3
GO: Cellular Component	GO:0000814	ESCRT II complex		0.0777	0.1668	1	3	VPS25
GO: Cellular Component	GO:0060200	clathrin-sculpted acetylcholine transport vesicle		0.0777	0.1668	1	3	RAB3A
GO: Cellular Component	GO:0032127	dense core granule membrane		0.0777	0.1668	1	3	ACTN1
GO: Cellular Component	GO:0071062	alphav-beta3 integrin-vitronectin complex		0.0777	0.1668	1	3	VTN
GO: Cellular Component	GO:0016222	procollagen-proline 4-dioxygenase complex		0.0777	0.1668	1	3	P4HB
GO: Cellular Component	GO:0030934	anchoring collagen complex		0.0777	0.1668	1	3	COL12A1
GO: Cellular Component	GO:0043195	terminal bouton		0.07852	0.168	6	112	HSPA8,APP,DNAJC5,RAB7A,RAB3A,SYT7
GO: Cellular Component	GO:0097386	glial cell projection		0.08163	0.1741	2	18	EZR,APP
GO: Cellular Component	GO:0033116	endoplasmic reticulum-Golgi intermediate compartment membrane		0.08663	0.1841	4	63	SERPINA1,CTSZ,RAB2A,CD59
GO: Cellular Component	GO:0031258	lamellipodium membrane		0.08968	0.1875	2	19	CFL1,DPP4
GO: Cellular Component	GO:1902562	H4 histone acetyltransferase complex		0.08968	0.1875	2	19	ACTB,RUVBL1
GO: Cellular Component	GO:0043189	H4/H2A histone acetyltransferase complex		0.08968	0.1875	2	19	ACTB,RUVBL1
GO: Cellular Component	GO:0035267	NuA4 histone acetyltransferase complex		0.08968	0.1875	2	19	ACTB,RUVBL1
GO: Cellular Component	GO:0001891	phagocytic cup		0.08968	0.1875	2	19	ANXA1,LCP1
GO: Cellular Component	GO:0036464	cytoplasmic ribonucleoprotein granule		0.09017	0.1879	7	144	ACTB,PSMA2,PSMA4,PSMA6,PSMC3,IQGAP1,CDC42
GO: Cellular Component	GO:0016529	sarcoplasmic reticulum		0.09869	0.2026	4	66	CA4,CACNA2D1,CALR,THBS1
GO: Cellular Component	GO:0042825	TAP complex		0.1022	0.2026	1	4	PDIA3
GO: Cellular Component	GO:0033269	internode region of axon		0.1022	0.2026	1	4	TUBB4A
GO: Cellular Component	GO:0060203	clathrin-sculpted glutamate transport vesicle membrane		0.1022	0.2026	1	4	RAB3A
GO: Cellular Component	GO:0042567	insulin-like growth factor ternary complex		0.1022	0.2026	1	4	IGFBP5
GO: Cellular Component	GO:0016942	insulin-like growth factor binding protein complex		0.1022	0.2026	1	4	IGFBP5
GO: Cellular Component	GO:0030478	actin cap		0.1022	0.2026	1	4	GSN
GO: Cellular Component	GO:0044194	cytolytic granule		0.1022	0.2026	1	4	LAMP1
GO: Cellular Component	GO:0000322	storage vacuole		0.1022	0.2026	1	4	CDC42
GO: Cellular Component	GO:0005610	laminin-5 complex		0.1022	0.2026	1	4	LAMA5
GO: Cellular Component	GO:0071953	elastic fiber		0.1022	0.2026	1	4	MFAP4
GO: Cellular Component	GO:0036454	growth factor complex		0.1022	0.2026	1	4	IGFBP5
GO: Cellular Component	GO:0005642	annulate lamellae		0.1022	0.2026	1	4	EIF5A
GO: Cellular Component	GO:0000015	phosphopyruvate hydratase complex		0.1022	0.2026	1	4	ENO1
GO: Cellular Component	GO:0097452	GAIT complex		0.1022	0.2026	1	4	GAPDH
GO: Cellular Component	GO:0060199	clathrin-sculpted glutamate transport vesicle		0.1022	0.2026	1	4	RAB3A
GO: Cellular Component	GO:0031672	A band		0.1059	0.2092	3	43	ALDOA,HSPB1,ENO1
GO: Cellular Component	GO:0005913	cell-cell adherens junction		0.1071	0.2109	4	68	ACTN1,VCL,DSC2,CDH1
GO: Cellular Component	GO:0031253	cell projection membrane		0.1074	0.2109	13	332	CFL1,HSP90AA1,HSP90AB1,EZR,ARF4,MYO6,ACE,B4GALT1,GNB1,CA4,GPI,DPP4,LCP1
GO: Cellular Component	GO:0030425	dendrite		0.1089	0.2131	21	590	ACTN1,TXN,CLU,MME,BAIAP2,MLPH,HSPA8,HSPB1,ANXA3,ANXA5,CPE,APOD,APP,ARF4,IL6ST,SOD1,GNB1,RAB27A,NOV,LAMP1,EIF5A
GO: Cellular Component	GO:0044439	peroxisomal part		0.1129	0.2196	5	96	PRDX5,IDH1,CRYM,SYT7,PRDX1
GO: Cellular Component	GO:0044438	microbody part		0.1129	0.2196	5	96	PRDX5,IDH1,CRYM,SYT7,PRDX1
GO: Cellular Component	GO:0055038	recycling endosome membrane		0.1173	0.2275	3	45	PIGR,RAB11A,RAB10
GO: Cellular Component	GO:0042629	mast cell granule		0.1239	0.2354	2	23	ANXA1,YWHAZ
GO: Cellular Component	GO:0030027	lamellipodium		0.1241	0.2354	8	186	CFL1,ACTG2,APP,NME2,DPP4,CORO1B,GSN,CDH1
GO: Cellular Component	GO:0000932	P-body		0.125	0.2354	4	72	PSMA2,PSMA4,PSMA6,PSMC3
GO: Cellular Component	GO:0032010	phagolysosome		0.1261	0.2354	1	5	LAMP1
GO: Cellular Component	GO:0070081	clathrin-sculpted monoamine transport vesicle		0.1261	0.2354	1	5	RAB3A
GO: Cellular Component	GO:1990357	terminal web		0.1261	0.2354	1	5	VCL
GO: Cellular Component	GO:0031088	platelet dense granule membrane		0.1261	0.2354	1	5	LAMP2
GO: Cellular Component	GO:0097255	R2TP complex		0.1261	0.2354	1	5	RUVBL1
GO: Cellular Component	GO:0097418	neurofibrillary tangle		0.1261	0.2354	1	5	CLU
GO: Cellular Component	GO:0070083	clathrin-sculpted monoamine transport vesicle membrane		0.1261	0.2354	1	5	RAB3A
GO: Cellular Component	GO:0031313	extrinsic component of endosome membrane		0.1261	0.2354	1	5	ANXA1
GO: Cellular Component	GO:0033093	Weibel-Palade body		0.1261	0.2354	1	5	RAB27A
GO: Cellular Component	GO:0000836	Hrd1p ubiquitin ligase complex		0.1261	0.2354	1	5	OS9
GO: Cellular Component	GO:0042588	zymogen granule		0.1329	0.2474	2	24	RAB3D,RAB27B
GO: Cellular Component	GO:0044304	main axon		0.1343	0.2493	4	74	TUBB4A,APP,SPOCK1,CDH1
GO: Cellular Component	GO:0032154	cleavage furrow		0.1412	0.2606	3	49	RHOC,RAB21,RAB11A
GO: Cellular Component	GO:0097610	cell surface furrow		0.1412	0.2606	3	49	RHOC,RAB21,RAB11A
GO: Cellular Component	GO:0042584	chromaffin granule membrane		0.1494	0.2672	1	6	ANXA7
GO: Cellular Component	GO:1990454	L-type voltage-gated calcium channel complex		0.1494	0.2672	1	6	CACNA2D1
GO: Cellular Component	GO:0071438	invadopodium membrane		0.1494	0.2672	1	6	DPP4
GO: Cellular Component	GO:0000835	ER ubiquitin ligase complex		0.1494	0.2672	1	6	OS9
GO: Cellular Component	GO:0001652	granular component		0.1494	0.2672	1	6	CLEC3B
GO: Cellular Component	GO:0044352	pinosome		0.1494	0.2672	1	6	ANXA2
GO: Cellular Component	GO:0005828	kinetochore microtubule		0.1494	0.2672	1	6	RAB11A
GO: Cellular Component	GO:0044354	macropinosome		0.1494	0.2672	1	6	ANXA2
GO: Cellular Component	GO:0005593	FACIT collagen trimer		0.1494	0.2672	1	6	COL12A1
GO: Cellular Component	GO:0046696	lipopolysaccharide receptor complex		0.1494	0.2672	1	6	CD14
GO: Cellular Component	GO:0032009	early phagosome		0.1494	0.2672	1	6	SYT7
GO: Cellular Component	GO:0031674	I band		0.1513	0.2692	6	135	ACTN1,ALDOA,HSPB1,VCL,ANXA5,FBP2
GO: Cellular Component	GO:0002102	podosome		0.1513	0.2692	2	26	LCP1,GSN
GO: Cellular Component	GO:0042611	MHC protein complex		0.1607	0.2851	2	27	AZGP1,B2M
GO: Cellular Component	GO:0009898	cytoplasmic side of plasma membrane		0.1648	0.2916	7	169	EZR,RAB21,IQGAP1,GM2A,GNB1,GNB2,CDH1
GO: Cellular Component	GO:0016328	lateral plasma membrane		0.1667	0.2941	3	53	ANXA1,IQGAP1,CDH1
GO: Cellular Component	GO:0072357	PTW/PP1 phosphatase complex		0.172	0.3002	1	7	PPP1CB
GO: Cellular Component	GO:0097486	multivesicular body lumen		0.172	0.3002	1	7	CTSH
GO: Cellular Component	GO:0031906	late endosome lumen		0.172	0.3002	1	7	CTSH
GO: Cellular Component	GO:0097197	tetraspanin-enriched microdomain		0.172	0.3002	1	7	ADAM10
GO: Cellular Component	GO:0030173	integral component of Golgi membrane		0.1732	0.3015	3	54	ST6GAL1,STEAP2,QSOX1
GO: Cellular Component	GO:0044445	cytosolic part		0.1758	0.3052	9	235	RPLP1,UBA52,CCT2,APOD,CCT5,PSMC3,PSMC4,CCT6A,ENO1
GO: Cellular Component	GO:0044295	axonal growth cone		0.1797	0.3112	2	29	KIF5B,AGRN
GO: Cellular Component	GO:0051233	spindle midzone		0.1894	0.327	2	30	APP,CDC42
GO: Cellular Component	GO:0032153	cell division site		0.1933	0.328	3	57	RHOC,RAB21,RAB11A
GO: Cellular Component	GO:0032155	cell division site part		0.1933	0.328	3	57	RHOC,RAB21,RAB11A
GO: Cellular Component	GO:0005952	cAMP-dependent protein kinase complex		0.194	0.328	1	8	PRKAR2A
GO: Cellular Component	GO:0042788	polysomal ribosome		0.194	0.328	1	8	EEF2
GO: Cellular Component	GO:0005767	secondary lysosome		0.194	0.328	1	8	LAMP1
GO: Cellular Component	GO:0000137	Golgi cis cisterna		0.194	0.328	1	8	LYZ
GO: Cellular Component	GO:0043203	axon hillock		0.194	0.328	1	8	SERPINF1
GO: Cellular Component	GO:0033018	sarcoplasmic reticulum lumen		0.194	0.328	1	8	CALR
GO: Cellular Component	GO:0098796	membrane protein complex		0.1951	0.3289	33	1059	PARK7,TSG101,MVB12A,CLIC1,HSPA2,SDCBP,VCP,VTN,VPS25,IGF2R,DNAJC3,IL6ST,ATP6V1A,AZGP1,B2M,GLRA2,RAB7A,GM2A,OS9,GNB1,GNB2,VPS37C,CACNA2D1,CALM1,CALR,LAMP2,VPS37B,TF,PDIA3,TGFBR3,CD14,VPS28,CDH1
GO: Cellular Component	GO:0031228	intrinsic component of Golgi membrane		0.207	0.3478	3	59	ST6GAL1,STEAP2,QSOX1
GO: Cellular Component	GO:0030018	Z disc		0.2107	0.3478	5	119	ACTN1,HSPB1,VCL,ANXA5,FBP2
GO: Cellular Component	GO:0030315	T-tubule		0.214	0.3478	3	60	EZR,PRKAR2A,CACNA2D1
GO: Cellular Component	GO:0031594	neuromuscular junction		0.214	0.3478	3	60	APP,SPOCK1,PTN
GO: Cellular Component	GO:0000812	Swr1 complex		0.2155	0.3478	1	9	RUVBL1
GO: Cellular Component	GO:0051286	cell tip		0.2155	0.3478	1	9	EZR
GO: Cellular Component	GO:0031371	ubiquitin conjugating enzyme complex		0.2155	0.3478	1	9	UBE2V2
GO: Cellular Component	GO:0036128	CatSper complex		0.2155	0.3478	1	9	HSPA2
GO: Cellular Component	GO:0032593	insulin-responsive compartment		0.2155	0.3478	1	9	RAB10
GO: Cellular Component	GO:0005915	zonula adherens		0.2155	0.3478	1	9	VCL
GO: Cellular Component	GO:0072687	meiotic spindle		0.2155	0.3478	1	9	HSPA2
GO: Cellular Component	GO:0045009	chitosome		0.2155	0.3478	1	9	RAB7A
GO: Cellular Component	GO:0033162	melanosome membrane		0.2155	0.3478	1	9	RAB7A
GO: Cellular Component	GO:0033180	proton-transporting V-type ATPase, V1 domain		0.2155	0.3478	1	9	ATP6V1A
GO: Cellular Component	GO:0034098	VCP-NPL4-UFD1 AAA ATPase complex		0.2155	0.3478	1	9	VCP
GO: Cellular Component	GO:0008290	F-actin capping protein complex		0.2155	0.3478	1	9	CAPZA1
GO: Cellular Component	GO:0016342	catenin complex		0.2155	0.3478	1	9	CDH1
GO: Cellular Component	GO:0098562	cytoplasmic side of membrane		0.2196	0.3535	7	184	EZR,RAB21,IQGAP1,GM2A,GNB1,GNB2,CDH1
GO: Cellular Component	GO:0044441	ciliary part		0.2324	0.3732	12	353	ALDOA,HSP90AA1,EZR,APP,PRKAR2A,CTSH,ACE,KIF5B,GNB1,GPI,LDHA,GSTM3
GO: Cellular Component	GO:0034704	calcium channel complex		0.2351	0.3749	3	63	HSPA2,CACNA2D1,CALM1
GO: Cellular Component	GO:0045179	apical cortex		0.2364	0.3749	1	10	GM2A
GO: Cellular Component	GO:1990124	messenger ribonucleoprotein complex		0.2364	0.3749	1	10	HSPA8
GO: Cellular Component	GO:0001527	microfibril		0.2364	0.3749	1	10	MFAP4
GO: Cellular Component	GO:0031588	nucleotide-activated protein kinase complex		0.2364	0.3749	1	10	PRKAR2A
GO: Cellular Component	GO:0045178	basal part of cell		0.2422	0.3832	3	64	PRCP,ACE,TF
GO: Cellular Component	GO:0030658	transport vesicle membrane		0.2449	0.3866	6	158	CPE,B2M,RAB3A,CA4,SYT7,CD59
GO: Cellular Component	GO:1904115	axon cytoplasm		0.2484	0.3911	2	36	RAB21,SOD1
GO: Cellular Component	GO:0036513	Derlin-1 retrotranslocation complex		0.2567	0.4002	1	11	VCP
GO: Cellular Component	GO:0031094	platelet dense tubular network		0.2567	0.4002	1	11	SERPINA5
GO: Cellular Component	GO:0001520	outer dense fiber		0.2567	0.4002	1	11	CTSH
GO: Cellular Component	GO:0016600	flotillin complex		0.2567	0.4002	1	11	CDH1
GO: Cellular Component	GO:0005834	heterotrimeric G-protein complex		0.2682	0.4172	2	38	GNB1,GNB2
GO: Cellular Component	GO:0043296	apical junction complex		0.2699	0.4189	5	131	AOC1,VCL,F11R,MPP5,CDH1
GO: Cellular Component	GO:0016459	myosin complex		0.2709	0.4194	3	68	ACTG2,MYL6,MYO6
GO: Cellular Component	GO:0071782	endoplasmic reticulum tubular network		0.2765	0.4225	1	12	RAB10
GO: Cellular Component	GO:0031254	cell trailing edge		0.2765	0.4225	1	12	EZR
GO: Cellular Component	GO:0001931	uropod		0.2765	0.4225	1	12	EZR
GO: Cellular Component	GO:0071203	WASH complex		0.2765	0.4225	1	12	CAPZA1
GO: Cellular Component	GO:0071437	invadopodium		0.2765	0.4225	1	12	DPP4
GO: Cellular Component	GO:0005905	clathrin-coated pit		0.2781	0.4225	3	69	APP,MYO6,TF
GO: Cellular Component	GO:0000795	synaptonemal complex		0.2781	0.4225	2	39	HSPA2,P3H4
GO: Cellular Component	GO:0005801	cis-Golgi network		0.2781	0.4225	2	39	MAN2A1,NUCB1
GO: Cellular Component	GO:0044322	endoplasmic reticulum quality control compartment		0.2957	0.446	1	13	OS9
GO: Cellular Component	GO:0045239	tricarboxylic acid cycle enzyme complex		0.2957	0.446	1	13	FH
GO: Cellular Component	GO:0000164	protein phosphatase type 1 complex		0.2957	0.446	1	13	PPP1CB
GO: Cellular Component	GO:0005891	voltage-gated calcium channel complex		0.298	0.4483	2	41	HSPA2,CACNA2D1
GO: Cellular Component	GO:0044853	plasma membrane raft		0.3057	0.4589	4	105	EZR,PRKAR2A,CTSB,CDH1
GO: Cellular Component	GO:0035097	histone methyltransferase complex		0.3073	0.4602	3	73	ACTB,PPP1CB,RUVBL1
GO: Cellular Component	GO:0031011	Ino80 complex		0.3145	0.4677	1	14	RUVBL1
GO: Cellular Component	GO:0042589	zymogen granule membrane		0.3145	0.4677	1	14	RAB27B
GO: Cellular Component	GO:0000974	Prp19 complex		0.3145	0.4677	1	14	HSPA8
GO: Cellular Component	GO:0009925	basal plasma membrane		0.3177	0.4714	2	43	ACE,TF
GO: Cellular Component	GO:0005635	nuclear envelope		0.3239	0.4795	14	454	CLIC1,ANXA4,ANXA7,ANXA11,APEH,APP,IGF2R,CST3,GAPDH,MYO6,PTGDS,PDCD6,FAM3B,EIF5A
GO: Cellular Component	GO:0043204	perikaryon		0.3269	0.4829	5	142	HSPA8,HSPB1,ANXA5,CPE,BTD
GO: Cellular Component	GO:0033202	DNA helicase complex		0.3327	0.487	1	15	RUVBL1
GO: Cellular Component	GO:0000177	cytoplasmic exosome (RNase complex)		0.3327	0.487	1	15	DIS3
GO: Cellular Component	GO:0000176	nuclear exosome (RNase complex)		0.3327	0.487	1	15	DIS3
GO: Cellular Component	GO:0000153	cytoplasmic ubiquitin ligase complex		0.3327	0.487	1	15	OS9
GO: Cellular Component	GO:0001917	photoreceptor inner segment		0.347	0.5068	2	46	HSPA8,GNB1
GO: Cellular Component	GO:0034045	phagophore assembly site membrane		0.3505	0.507	1	16	RAB7A
GO: Cellular Component	GO:0098827	endoplasmic reticulum subcompartment		0.3505	0.507	1	16	RAB10
GO: Cellular Component	GO:0032279	asymmetric synapse		0.3505	0.507	1	16	HSPA8
GO: Cellular Component	GO:0090533	cation-transporting ATPase complex		0.3505	0.507	1	16	GM2A
GO: Cellular Component	GO:0005758	mitochondrial intermembrane space		0.3511	0.507	3	79	PARK7,SOD1,PDIA3
GO: Cellular Component	GO:0060076	excitatory synapse		0.3562	0.5132	8	252	ACTB,ADAM10,BAIAP2,HSPA8,CLSTN1,YWHAZ,SPOCK1,PTPRF
GO: Cellular Component	GO:0031901	early endosome membrane		0.3601	0.5176	4	114	ANXA1,ZFYVE28,RAB21,B2M
GO: Cellular Component	GO:0099512	supramolecular fiber		0.3658	0.524	21	721	ACTN1,TUBB4A,MLPH,HSPA8,VCL,EZR,RAB3D,CCT2,CCT5,CTSH,PTGES3,MYO6,RAB11A,IQGAP1,KIF5B,NME2,CALM1,TUBA1C,CORO1B,LCP1,CCT6A
GO: Cellular Component	GO:0033178	proton-transporting two-sector ATPase complex, catalytic domain		0.3678	0.524	1	17	ATP6V1A
GO: Cellular Component	GO:0031143	pseudopodium		0.3678	0.524	1	17	ACTN1
GO: Cellular Component	GO:0097225	sperm midpiece		0.3678	0.524	1	17	ACE
GO: Cellular Component	GO:0015630	microtubule cytoskeleton		0.3725	0.5296	32	1125	MDH1,TUBB4A,MVB12A,HSPA1A,MLPH,HSPA2,HSPA6,HSPA8,HSPB1,EZR,ANXA11,RAB3D,CCT2,APP,YWHAE,PPP2R1A,RUVBL1,CCT5,PRKAR2A,GAPDH,RAB11A,IQGAP1,ALKBH8,F11R,KIF5B,PDCD6IP,CALM1,TUBA1C,NUCB1,UBXN6,CCT6A,CDC42
GO: Cellular Component	GO:0043197	dendritic spine		0.3744	0.5311	5	151	ACTN1,BAIAP2,HSPA8,APP,ARF4
GO: Cellular Component	GO:0097440	apical dendrite		0.3846	0.5385	1	18	CLU
GO: Cellular Component	GO:0000145	exocyst		0.3846	0.5385	1	18	RAB10
GO: Cellular Component	GO:0042622	photoreceptor outer segment membrane		0.3846	0.5385	1	18	GNB1
GO: Cellular Component	GO:0044309	neuron spine		0.385	0.5385	5	153	ACTN1,BAIAP2,HSPA8,APP,ARF4
GO: Cellular Component	GO:0008287	protein serine/threonine phosphatase complex		0.3854	0.5385	2	50	PPP1CB,PPP2R1A
GO: Cellular Component	GO:1903293	phosphatase complex		0.3854	0.5385	2	50	PPP1CB,PPP2R1A
GO: Cellular Component	GO:0034707	chloride channel complex		0.3854	0.5385	2	50	CLIC1,GLRA2
GO: Cellular Component	GO:0005697	telomerase holoenzyme complex		0.401	0.5565	1	19	PTGES3
GO: Cellular Component	GO:0097381	photoreceptor disc membrane		0.401	0.5565	1	19	GNB1
GO: Cellular Component	GO:0099738	cell cortex region		0.401	0.5565	1	19	GM2A
GO: Cellular Component	GO:0005789	endoplasmic reticulum membrane		0.4044	0.5601	28	994	HSP90B1,DNAJB9,UBA1,PLA2G2A,PLOD1,HSPA5,SDCBP,VCP,ANXA7,CLSTN1,RAB21,DNAJC3,ERAP1,PTGDS,RAB10,CANT1,REEP6,OS9,RAB1A,RAB2A,PLOD3,PDCD6,CALR,TMBIM6,PDIA3,EIF5A,CD59,CDC42
GO: Cellular Component	GO:0005581	collagen trimer		0.4161	0.5737	3	88	COL6A2,COL12A1,COL18A1
GO: Cellular Component	GO:0035371	microtubule plus-end		0.4169	0.5737	1	20	MLPH
GO: Cellular Component	GO:0000159	protein phosphatase type 2A complex		0.4169	0.5737	1	20	PPP2R1A
GO: Cellular Component	GO:0044430	cytoskeletal part		0.4211	0.5765	42	1520	CFL1,ACTG2,ACTN1,MDH1,TUBB4A,MVB12A,HSPA1A,MLPH,HSPA2,HSPA6,HSPA8,HSPB1,VCL,CAP1,EZR,ANXA2,ANXA11,RAB3D,CCT2,APP,YWHAE,RUVBL1,CCT5,PRKAR2A,PTGES3,MYL6,MYO6,RAB11A,IQGAP1,KIF5B,NME2,PDCD6IP,CALM1,TUBA1C,CAPZA1,UBXN6,CORO1B,LCP1,GSN,CCT6A,CDC42,CDH1
GO: Cellular Component	GO:0014069	postsynaptic density		0.4216	0.5765	7	232	ACTB,ADAM10,BAIAP2,HSPA8,CLSTN1,YWHAZ,SPOCK1
GO: Cellular Component	GO:0099572	postsynaptic specialization		0.4216	0.5765	7	232	ACTB,ADAM10,BAIAP2,HSPA8,CLSTN1,YWHAZ,SPOCK1
GO: Cellular Component	GO:0012507	ER to Golgi transport vesicle membrane		0.432	0.5814	2	55	B2M,CD59
GO: Cellular Component	GO:0005871	kinesin complex		0.432	0.5814	2	55	YWHAE,KIF5B
GO: Cellular Component	GO:0097346	INO80-type complex		0.4325	0.5814	1	21	RUVBL1
GO: Cellular Component	GO:0032839	dendrite cytoplasm		0.4325	0.5814	1	21	SOD1
GO: Cellular Component	GO:0031528	microvillus membrane		0.4325	0.5814	1	21	EZR
GO: Cellular Component	GO:0043034	costamere		0.4325	0.5814	1	21	VCL
GO: Cellular Component	GO:0001673	male germ cell nucleus		0.4325	0.5814	1	21	HSPA2
GO: Cellular Component	GO:0000178	exosome (RNase complex)		0.4325	0.5814	1	21	DIS3
GO: Cellular Component	GO:0099513	polymeric cytoskeletal fiber		0.4335	0.5816	20	712	ACTN1,TUBB4A,MLPH,HSPA8,VCL,EZR,RAB3D,CCT2,CCT5,PTGES3,MYO6,RAB11A,IQGAP1,KIF5B,NME2,CALM1,TUBA1C,CORO1B,LCP1,CCT6A
GO: Cellular Component	GO:0034708	methyltransferase complex		0.4444	0.595	3	92	ACTB,PPP1CB,RUVBL1
GO: Cellular Component	GO:0042175	nuclear outer membrane-endoplasmic reticulum membrane network		0.4488	0.5996	28	1015	HSP90B1,DNAJB9,UBA1,PLA2G2A,PLOD1,HSPA5,SDCBP,VCP,ANXA7,CLSTN1,RAB21,DNAJC3,ERAP1,PTGDS,RAB10,CANT1,REEP6,OS9,RAB1A,RAB2A,PLOD3,PDCD6,CALR,TMBIM6,PDIA3,EIF5A,CD59,CDC42
GO: Cellular Component	GO:0005874	microtubule		0.4611	0.6113	12	426	TUBB4A,MLPH,HSPA8,RAB3D,CCT2,CCT5,RAB11A,IQGAP1,KIF5B,CALM1,TUBA1C,CCT6A
GO: Cellular Component	GO:0042571	immunoglobulin complex, circulating		0.4623	0.6113	1	23	IGLL5
GO: Cellular Component	GO:0030904	retromer complex		0.4623	0.6113	1	23	RAB7A
GO: Cellular Component	GO:0032982	myosin filament		0.4623	0.6113	1	23	ACTG2
GO: Cellular Component	GO:0033176	proton-transporting V-type ATPase complex		0.4623	0.6113	1	23	ATP6V1A
GO: Cellular Component	GO:0044216	other organism cell		0.4766	0.6226	1	24	C4A
GO: Cellular Component	GO:0044217	other organism part		0.4766	0.6226	1	24	C4A
GO: Cellular Component	GO:0098533	ATPase dependent transmembrane transport complex		0.4766	0.6226	1	24	GM2A
GO: Cellular Component	GO:0044215	other organism		0.4766	0.6226	1	24	C4A
GO: Cellular Component	GO:0043198	dendritic shaft		0.4766	0.6226	2	60	HSPA8,APP
GO: Cellular Component	GO:0005876	spindle microtubule		0.4766	0.6226	2	60	RAB11A,CALM1
GO: Cellular Component	GO:0030687	preribosome, large subunit precursor		0.4905	0.6382	1	25	RPLP1
GO: Cellular Component	GO:1904949	ATPase complex		0.4905	0.6382	1	25	GM2A
GO: Cellular Component	GO:0032838	plasma membrane bounded cell projection cytoplasm		0.5024	0.651	2	63	RAB21,SOD1
GO: Cellular Component	GO:0005881	cytoplasmic microtubule		0.5024	0.651	2	63	RAB3D,TUBA1C
GO: Cellular Component	GO:0031965	nuclear membrane		0.5086	0.6577	8	290	CLIC1,ANXA4,APEH,CST3,GAPDH,MYO6,PTGDS,PDCD6
GO: Cellular Component	GO:0055037	recycling endosome		0.5134	0.6626	4	140	PIGR,RAB11A,RAB10,TF
GO: Cellular Component	GO:0043073	germ cell nucleus		0.5173	0.6637	1	27	HSPA2
GO: Cellular Component	GO:0031941	filamentous actin		0.5173	0.6637	1	27	MYO6
GO: Cellular Component	GO:0019814	immunoglobulin complex		0.5173	0.6637	1	27	IGLL5
GO: Cellular Component	GO:1990752	microtubule end		0.5302	0.6748	1	28	MLPH
GO: Cellular Component	GO:0000421	autophagosome membrane		0.5302	0.6748	1	28	RAB7A
GO: Cellular Component	GO:0044665	MLL1/2 complex		0.5302	0.6748	1	28	RUVBL1
GO: Cellular Component	GO:0071339	MLL1 complex		0.5302	0.6748	1	28	RUVBL1
GO: Cellular Component	GO:0016363	nuclear matrix		0.5319	0.6756	3	105	CFL1,RUVBL1,PSMA6
GO: Cellular Component	GO:0098794	postsynapse		0.5346	0.6774	12	449	ACTB,ACTN1,ADAM10,BAIAP2,HSPA8,HSPB1,APP,CLSTN1,YWHAZ,ARF4,SPOCK1,GLRA2
GO: Cellular Component	GO:0022625	cytosolic large ribosomal subunit		0.5354	0.6774	2	67	RPLP1,UBA52
GO: Cellular Component	GO:0098553	lumenal side of endoplasmic reticulum membrane		0.5427	0.6795	1	29	CALR
GO: Cellular Component	GO:0032809	neuronal cell body membrane		0.5427	0.6795	1	29	IL6ST
GO: Cellular Component	GO:0044298	cell body membrane		0.5427	0.6795	1	29	IL6ST
GO: Cellular Component	GO:0097546	ciliary base		0.5427	0.6795	1	29	PRKAR2A
GO: Cellular Component	GO:0071556	integral component of lumenal side of endoplasmic reticulum membrane		0.5427	0.6795	1	29	CALR
GO: Cellular Component	GO:0045334	clathrin-coated endocytic vesicle		0.5434	0.6795	2	68	MYO6,CD9
GO: Cellular Component	GO:0031234	extrinsic component of cytoplasmic side of plasma membrane		0.5447	0.6798	3	107	IQGAP1,GNB1,GNB2
GO: Cellular Component	GO:0043235	receptor complex		0.5496	0.6846	9	339	PIGR,SDCBP,APP,IL6ST,B2M,TF,TGFBR3,LIFR,CD14
GO: Cellular Component	GO:0098797	plasma membrane protein complex		0.5547	0.6885	14	532	HSPA2,SDCBP,VTN,IL6ST,AZGP1,B2M,GM2A,GNB1,GNB2,CACNA2D1,CALM1,TF,TGFBR3,CDH1
GO: Cellular Component	GO:0005719	nuclear euchromatin		0.5549	0.6885	1	30	PRDX1
GO: Cellular Component	GO:0000407	phagophore assembly site		0.5667	0.7019	1	31	RAB7A
GO: Cellular Component	GO:0035861	site of double-strand break		0.5895	0.7287	1	33	VCP
GO: Cellular Component	GO:0005923	bicellular tight junction		0.5937	0.7325	3	115	AOC1,F11R,MPP5
GO: Cellular Component	GO:0005921	gap junction		0.6004	0.7394	1	34	NOV
GO: Cellular Component	GO:0070160	occluding junction		0.6112	0.7511	3	118	AOC1,F11R,MPP5
GO: Cellular Component	GO:0022626	cytosolic ribosome		0.6169	0.7567	3	119	RPLP1,UBA52,APOD
GO: Cellular Component	GO:0031301	integral component of organelle membrane		0.6299	0.7713	7	283	ITM2B,HSPA5,ST6GAL1,STEAP2,QSOX1,CALR,PDIA3
GO: Cellular Component	GO:0005776	autophagosome		0.6453	0.7871	2	82	HSPA8,RAB7A
GO: Cellular Component	GO:0032588	trans-Golgi network membrane		0.6453	0.7871	2	82	APP,IGF2R
GO: Cellular Component	GO:0001750	photoreceptor outer segment		0.6519	0.7936	2	83	GNB1,RAB27A
GO: Cellular Component	GO:0000791	euchromatin		0.6602	0.8022	1	40	PRDX1
GO: Cellular Component	GO:0060170	ciliary membrane		0.6709	0.8137	2	86	GNB1,GPI
GO: Cellular Component	GO:0031300	intrinsic component of organelle membrane		0.6759	0.8178	7	296	ITM2B,HSPA5,ST6GAL1,STEAP2,QSOX1,CALR,PDIA3
GO: Cellular Component	GO:0000792	heterochromatin		0.6771	0.8178	2	87	UBA1,ALDOA
GO: Cellular Component	GO:0005720	nuclear heterochromatin		0.6781	0.8178	1	42	ALDOA
GO: Cellular Component	GO:0005747	mitochondrial respiratory chain complex I		0.6867	0.8235	1	43	PARK7
GO: Cellular Component	GO:0030964	NADH dehydrogenase complex		0.6867	0.8235	1	43	PARK7
GO: Cellular Component	GO:0045271	respiratory chain complex I		0.6867	0.8235	1	43	PARK7
GO: Cellular Component	GO:0000123	histone acetyltransferase complex		0.6892	0.8249	2	89	ACTB,RUVBL1
GO: Cellular Component	GO:0032420	stereocilium		0.695	0.8272	1	44	PLS3
GO: Cellular Component	GO:0045171	intercellular bridge		0.695	0.8272	1	44	QSOX1
GO: Cellular Component	GO:0030529	intracellular ribonucleoprotein complex		0.6962	0.8272	18	745	RPLP1,ACTB,UBA52,HSPA8,MSI1,APOD,DHX30,RUVBL1,PTGES3,GAPDH,PSMA2,PSMA4,PSMA6,PSMC3,IQGAP1,CALR,EEF2,CDC42
GO: Cellular Component	GO:1990904	ribonucleoprotein complex		0.6962	0.8272	18	745	RPLP1,ACTB,UBA52,HSPA8,MSI1,APOD,DHX30,RUVBL1,PTGES3,GAPDH,PSMA2,PSMA4,PSMA6,PSMC3,IQGAP1,CALR,EEF2,CDC42
GO: Cellular Component	GO:0034399	nuclear periphery		0.7004	0.8307	3	135	CFL1,RUVBL1,PSMA6
GO: Cellular Component	GO:0098802	plasma membrane receptor complex		0.7089	0.8387	4	180	SDCBP,IL6ST,B2M,TF
GO: Cellular Component	GO:0030176	integral component of endoplasmic reticulum membrane		0.7098	0.8387	3	137	HSPA5,CALR,PDIA3
GO: Cellular Component	GO:0042645	mitochondrial nucleoid		0.7111	0.8387	1	46	DHX30
GO: Cellular Component	GO:0005819	spindle		0.7151	0.8419	7	308	HSPA2,HSPB1,ANXA11,APP,RAB11A,CALM1,CDC42
GO: Cellular Component	GO:0030117	membrane coat		0.7231	0.8458	2	95	IGF2R,TF
GO: Cellular Component	GO:0048475	coated membrane		0.7231	0.8458	2	95	IGF2R,TF
GO: Cellular Component	GO:0009295	nucleoid		0.7263	0.8458	1	48	DHX30
GO: Cellular Component	GO:0030120	vesicle coat		0.7263	0.8458	1	48	TF
GO: Cellular Component	GO:0016469	proton-transporting two-sector ATPase complex		0.7263	0.8458	1	48	ATP6V1A
GO: Cellular Component	GO:0001533	cornified envelope		0.7263	0.8458	1	48	ANXA1
GO: Cellular Component	GO:0005901	caveola		0.7284	0.8468	2	96	CTSB,CDH1
GO: Cellular Component	GO:0031227	intrinsic component of endoplasmic reticulum membrane		0.7324	0.8483	3	142	HSPA5,CALR,PDIA3
GO: Cellular Component	GO:1990204	oxidoreductase complex		0.7337	0.8483	2	97	PARK7,P4HB
GO: Cellular Component	GO:0000794	condensed nuclear chromosome		0.7337	0.8483	2	97	HSPA2,P3H4
GO: Cellular Component	GO:0031226	intrinsic component of plasma membrane		0.7362	0.8496	42	1714	GOLM1,PIGR,MME,SDCBP,ATRN,ANPEP,FOLH1,CP,PODXL2,APP,SLC2A5,IGF2R,PLPP1,LYPD3,IL6ST,ATP6V1A,PRSS8,STEAP2,GGT1,PTPRF,PTPRS,GLRA2,GM2A,CA4,GPC1,CALM1,STEAP4,LAMP1,NCSTN,TMBIM6,TSPAN1,TGFBR3,LIFR,CD9,CD14,ADGRG2,LNPEP,TSPAN8,TSPAN6,CD59,TMPRSS2,CD81
GO: Cellular Component	GO:0030669	clathrin-coated endocytic vesicle membrane		0.7407	0.8523	1	50	CD9
GO: Cellular Component	GO:0005815	microtubule organizing center		0.7411	0.8523	15	646	MDH1,MVB12A,HSPA1A,MLPH,HSPA6,EZR,RUVBL1,CCT5,PRKAR2A,RAB11A,KIF5B,PDCD6IP,CALM1,UBXN6,CDC42
GO: Cellular Component	GO:0030118	clathrin coat		0.7476	0.8567	1	51	IGF2R
GO: Cellular Component	GO:1902493	acetyltransferase complex		0.7489	0.8567	2	100	ACTB,RUVBL1
GO: Cellular Component	GO:0031248	protein acetyltransferase complex		0.7489	0.8567	2	100	ACTB,RUVBL1
GO: Cellular Component	GO:0032421	stereocilium bundle		0.7609	0.8673	1	53	PLS3
GO: Cellular Component	GO:0030660	Golgi-associated vesicle membrane		0.7609	0.8673	1	53	ITM2B
GO: Cellular Component	GO:0005814	centriole		0.7727	0.8776	2	105	HSPA1A,HSPA6
GO: Cellular Component	GO:0015934	large ribosomal subunit		0.7727	0.8776	2	105	RPLP1,UBA52
GO: Cellular Component	GO:0031903	microbody membrane		0.7911	0.8954	1	58	SYT7
GO: Cellular Component	GO:0005778	peroxisomal membrane		0.7911	0.8954	1	58	SYT7
GO: Cellular Component	GO:0005759	mitochondrial matrix		0.8006	0.9045	9	425	PARK7,FH,PRDX5,NAXE,DHX30,SOD1,GARS,BTD,PRDX1
GO: Cellular Component	GO:0030672	synaptic vesicle membrane		0.8074	0.9079	1	61	SYT7
GO: Cellular Component	GO:0099501	exocytic vesicle membrane		0.8074	0.9079	1	61	SYT7
GO: Cellular Component	GO:0097060	synaptic membrane		0.8078	0.9079	6	298	HSPB1,CPE,CLSTN1,GLRA2,SYT7,ENO1
GO: Cellular Component	GO:0072686	mitotic spindle		0.8224	0.9227	1	64	CDC42
GO: Cellular Component	GO:0098803	respiratory chain complex		0.8363	0.9366	1	67	PARK7
GO: Cellular Component	GO:0044452	nucleolar part		0.849	0.9476	1	70	CLEC3B
GO: Cellular Component	GO:0030684	preribosome		0.849	0.9476	1	70	RPLP1
GO: Cellular Component	GO:0034703	cation channel complex		0.8507	0.9479	3	176	HSPA2,CACNA2D1,CALM1
GO: Cellular Component	GO:0000151	ubiquitin ligase complex		0.8571	0.9534	5	274	HSPA1A,HSPA8,CAND1,OS9,ITCH
GO: Cellular Component	GO:0070603	SWI/SNF superfamily-type complex		0.8645	0.9599	1	74	RUVBL1
GO: Cellular Component	GO:0005746	mitochondrial respiratory chain		0.8681	0.9621	1	75	PARK7
GO: Cellular Component	GO:1902495	transmembrane transporter complex		0.8703	0.9621	6	327	CLIC1,HSPA2,GLRA2,GM2A,CACNA2D1,CALM1
GO: Cellular Component	GO:0042734	presynaptic membrane		0.8716	0.9621	1	76	SYT7
GO: Cellular Component	GO:0000922	spindle pole		0.8724	0.9621	2	133	RAB11A,CALM1
GO: Cellular Component	GO:0005840	ribosome		0.8748	0.963	4	235	RPLP1,UBA52,APOD,EEF2
GO: Cellular Component	GO:1990351	transporter complex		0.8809	0.9673	6	333	CLIC1,HSPA2,GLRA2,GM2A,CACNA2D1,CALM1
GO: Cellular Component	GO:0017053	transcriptional repressor complex		0.8817	0.9673	1	79	YWHAB
GO: Cellular Component	GO:1902554	serine/threonine protein kinase complex		0.8879	0.9725	1	81	PRKAR2A
GO: Cellular Component	GO:0034702	ion channel complex		0.8896	0.9727	5	291	CLIC1,HSPA2,GLRA2,CACNA2D1,CALM1
GO: Cellular Component	GO:0005643	nuclear pore		0.8966	0.9787	1	84	EIF5A
GO: Cellular Component	GO:0044450	microtubule organizing center part		0.9055	0.9867	2	147	HSPA1A,HSPA6
GO: Cellular Component	GO:0070469	respiratory chain		0.9121	0.9923	1	90	PARK7
GO: Cellular Component	GO:0005887	integral component of plasma membrane		0.9141	0.9923	36	1651	GOLM1,PIGR,MME,SDCBP,ATRN,ANPEP,FOLH1,PODXL2,APP,SLC2A5,IGF2R,PLPP1,IL6ST,ATP6V1A,STEAP2,GGT1,PTPRF,PTPRS,GLRA2,GM2A,GPC1,CALM1,STEAP4,LAMP1,NCSTN,TMBIM6,TSPAN1,TGFBR3,LIFR,CD9,ADGRG2,LNPEP,TSPAN8,TSPAN6,TMPRSS2,CD81
GO: Cellular Component	GO:1902911	protein kinase complex		0.9168	0.9923	1	92	PRKAR2A
GO: Cellular Component	GO:0008076	voltage-gated potassium channel complex		0.9168	0.9923	1	92	CALM1
GO: Cellular Component	GO:0034705	potassium channel complex		0.919	0.993	1	93	CALM1
GO: Cellular Component	GO:0005875	microtubule associated complex		0.9224	0.9931	2	156	YWHAE,KIF5B
GO: Cellular Component	GO:0031967	organelle envelope		0.9273	0.9931	24	1169	PARK7,CLU,CLIC1,ANXA1,ANXA4,ANXA7,ANXA11,APEH,APP,IGF2R,CST3,SOD1,SORD,GAPDH,MYO6,PTGDS,NME2,PTCD3,PDCD6,FAM3B,TMBIM6,PDIA3,PEBP1,EIF5A
GO: Cellular Component	GO:0016591	DNA-directed RNA polymerase II, holoenzyme		0.9293	0.9931	1	98	MYO6
GO: Cellular Component	GO:0031975	envelope		0.9306	0.9931	24	1174	PARK7,CLU,CLIC1,ANXA1,ANXA4,ANXA7,ANXA11,APEH,APP,IGF2R,CST3,SOD1,SORD,GAPDH,MYO6,PTGDS,NME2,PTCD3,PDCD6,FAM3B,TMBIM6,PDIA3,PEBP1,EIF5A
GO: Cellular Component	GO:0005930	axoneme		0.9312	0.9931	1	99	CTSH
GO: Cellular Component	GO:0097014	ciliary plasm		0.9312	0.9931	1	99	CTSH
GO: Cellular Component	GO:0016605	PML body		0.9312	0.9931	1	99	PARK7
GO: Cellular Component	GO:0000781	chromosome, telomeric region		0.932	0.9931	2	162	PPP1CB,PTGES3
GO: Cellular Component	GO:0036064	ciliary basal body		0.933	0.9931	1	100	EZR
GO: Cellular Component	GO:0045211	postsynaptic membrane		0.9408	0.9998	3	225	HSPB1,CLSTN1,GLRA2
GO: Cellular Component	GO:0044391	ribosomal subunit		0.9491	1	2	175	RPLP1,UBA52
GO: Cellular Component	GO:0098800	inner mitochondrial membrane protein complex		0.9516	1	1	112	PARK7
GO: Cellular Component	GO:0005813	centrosome		0.9585	1	8	501	MDH1,MVB12A,HSPA1A,HSPA6,CCT5,PRKAR2A,RAB11A,CALM1
GO: Cellular Component	GO:0000428	DNA-directed RNA polymerase complex		0.9621	1	1	121	MYO6
GO: Cellular Component	GO:0055029	nuclear DNA-directed RNA polymerase complex		0.9621	1	1	121	MYO6
GO: Cellular Component	GO:0030880	RNA polymerase complex		0.9651	1	1	124	MYO6
GO: Cellular Component	GO:0005882	intermediate filament		0.9718	1	2	201	HSPA8,NME2
GO: Cellular Component	GO:0000784	nuclear chromosome, telomeric region		0.9726	1	1	133	PPP1CB
GO: Cellular Component	GO:0000790	nuclear chromatin		0.9746	1	4	324	ACTB,ALDOA,RUVBL1,PRDX1
GO: Cellular Component	GO:0000793	condensed chromosome		0.976	1	2	208	HSPA2,P3H4
GO: Cellular Component	GO:0005730	nucleolus		0.9808	1	15	891	ACAT2,TSG101,DNAJB9,HSPA8,EZR,ANG,VPS25,DIS3,P3H4,PPP1CB,CCT5,CTSB,BTD,PRDX1,CLEC3B
GO: Cellular Component	GO:0044429	mitochondrial part		0.9815	1	17	987	PARK7,CLU,FH,PRDX5,NAXE,ANXA1,DHX30,SOD1,SORD,GARS,BTD,NME2,PTCD3,TMBIM6,PDIA3,PEBP1,PRDX1
GO: Cellular Component	GO:0098798	mitochondrial protein complex		0.9823	1	1	149	PARK7
GO: Cellular Component	GO:0031461	cullin-RING ubiquitin ligase complex		0.9845	1	1	154	CAND1
GO: Cellular Component	GO:1990234	transferase complex		0.986	1	11	722	ACTB,UBE2V2,HSPA1A,HSPA8,PPP1CB,RUVBL1,PRKAR2A,CAND1,MYO6,OS9,ITCH
GO: Cellular Component	GO:0044454	nuclear chromosome part		0.9885	1	7	531	ACTB,ALDOA,HSPA2,P3H4,PPP1CB,RUVBL1,PRDX1
GO: Cellular Component	GO:1902494	catalytic complex		0.9893	1	18	1077	PARK7,ACTB,UBE2V2,HSPA1A,HSPA8,PPP1CB,PPP2R1A,RUVBL1,PRKAR2A,CAND1,MYO6,GM2A,OS9,GNB1,GNB2,ITCH,P4HB,ENO1
GO: Cellular Component	GO:0045111	intermediate filament cytoskeleton		0.9897	1	2	244	HSPA8,NME2
GO: Cellular Component	GO:0061695	transferase complex, transferring phosphorus-containing groups		0.9897	1	2	244	PRKAR2A,MYO6
GO: Cellular Component	GO:0005741	mitochondrial outer membrane		0.9903	1	1	171	PEBP1
GO: Cellular Component	GO:0000785	chromatin		0.9904	1	6	487	PARK7,ACTB,UBA1,ALDOA,RUVBL1,PRDX1
GO: Cellular Component	GO:0005681	spliceosomal complex		0.9908	1	1	173	HSPA8
GO: Cellular Component	GO:0000775	chromosome, centromeric region		0.9933	1	1	185	PPP2R1A
GO: Cellular Component	GO:0044455	mitochondrial membrane part		0.994	1	1	189	PARK7
GO: Cellular Component	GO:0000228	nuclear chromosome		0.9941	1	7	569	ACTB,ALDOA,HSPA2,P3H4,PPP1CB,RUVBL1,PRDX1
GO: Cellular Component	GO:0005740	mitochondrial envelope		0.9948	1	10	736	PARK7,CLU,ANXA1,SOD1,SORD,NME2,PTCD3,TMBIM6,PDIA3,PEBP1
GO: Cellular Component	GO:0044427	chromosomal part		0.9949	1	12	839	PARK7,ACTB,UBA1,ALDOA,HSPA2,VCP,P3H4,PPP1CB,PPP2R1A,RUVBL1,PTGES3,PRDX1
GO: Cellular Component	GO:0031968	organelle outer membrane		0.9951	1	1	196	PEBP1
GO: Cellular Component	GO:0098687	chromosomal region		0.9952	1	3	344	PPP1CB,PPP2R1A,PTGES3
GO: Cellular Component	GO:0016607	nuclear speck		0.9957	1	1	201	BASP1
GO: Cellular Component	GO:0019867	outer membrane		0.9959	1	1	203	PEBP1
GO: Cellular Component	GO:0005694	chromosome		0.9977	1	13	941	PARK7,ACTB,UBA1,ALDOA,HSPA2,VCP,P3H4,PPP1CB,PPP1R7,PPP2R1A,RUVBL1,PTGES3,PRDX1
GO: Cellular Component	GO:0031966	mitochondrial membrane		0.9983	1	8	694	PARK7,CLU,ANXA1,SORD,NME2,PTCD3,TMBIM6,PEBP1
GO: Cellular Component	GO:0016604	nuclear body		0.9994	1	2	364	PARK7,BASP1
GO: Cellular Component	GO:0005667	transcription factor complex		0.9995	1	2	368	CREG1,LMO2
GO: Cellular Component	GO:0044451	nucleoplasm part		0.9999	1	6	732	PARK7,ACTB,BASP1,PPP1CB,RUVBL1,MYO6
GO: Cellular Component	GO:0005743	mitochondrial inner membrane		1	1	2	507	PARK7,PTCD3
GO: Cellular Component	GO:0019866	organelle inner membrane		1	1	2	564	PARK7,PTCD3

## Sheet: GO-MF
Category	ID	Name	Source	p-value	FDR	Hit Count in Query List	Hit Count in Genome	Hit in Query List
GO: Molecular Function	GO:0061134	peptidase regulator activity		2.346e-17	2.546e-14	35	222	A2M,SERPINF1,CD109,SERPINA1,SERPINA4,WFDC2,AGT,PRDX5,SERPINF2,VCP,FN1,APLP2,APP,CST1,SLPI,CST3,CST4,CTSH,CPAMD8,SPINK2,SPINT1,ACRBP,SPOCK1,SPINT3,PSME1,SPOCK3,SERPING1,C3,C4A,LCN1,PI15,TIMP1,TIMP2,PEBP1,SERPINA5
GO: Molecular Function	GO:0004857	enzyme inhibitor activity		3.666e-17	2.546e-14	46	393	A2M,SERPINF1,CD109,SERPINA1,SERPINA4,WFDC2,AGT,PRDX5,SERPINF2,HSPB1,ANXA1,ANXA2,ANXA3,ANXA4,ANXA5,APLP2,APOA1,APP,YWHAG,CST1,SLPI,CST3,CST4,PRKAR2A,DNAJC3,CPAMD8,SPINK2,SPINT1,SPOCK1,SPINT3,IQGAP1,PTN,SPOCK3,SERPING1,C3,C4A,SFN,LCN1,TMBIM6,PI15,RNH1,TIMP1,TIMP2,PEBP1,AGRN,SERPINA5
GO: Molecular Function	GO:0008233	peptidase activity		9.559e-16	2.768e-13	59	673	ACR,PARK7,ADAM10,PGC,CPQ,TPP1,UCHL3,PIP,MME,MMP2,CPVL,DPP7,ANPEP,ADAMTS1,FOLH1,APEH,CPD,CPE,CPZ,XPNPEP1,CPM,KLK3,CFI,PRCP,CNDP2,CTSB,CTSD,CTSH,CTSL,CTSZ,LGMN,CTSF,PRSS8,ERAP1,PSMA2,PSMA4,PSMA5,PSMA6,PSMB1,PSMB2,PSMB3,ACE,CFB,GGT1,GGH,C3,C4A,CAPN5,KLK2,KLK11,DPP4,PDCD6,NCSTN,PDIA3,USP5,LNPEP,TMPRSS2,SCPEP1,LTF
GO: Molecular Function	GO:0008238	exopeptidase activity		2.749e-14	4.773e-12	23	113	CPQ,TPP1,MME,CPVL,DPP7,ANPEP,FOLH1,APEH,CPD,CPE,CPZ,XPNPEP1,CPM,PRCP,CNDP2,CTSH,ERAP1,ACE,GGT1,GGH,DPP4,LNPEP,SCPEP1
GO: Molecular Function	GO:1901681	sulfur compound binding		6.876e-13	8.682e-11	32	260	AOC1,LIPG,BSPH1,VTN,FMOD,ANG,FN1,ADAMTS1,APLP2,APOH,APP,SOD3,DBI,SMOC2,PTN,PTPRF,GNS,NOV,GPC1,CRISPLD2,GPX3,GSS,GSTM3,GSTP1,TGFBR3,THBS1,FSTL1,LPL,CLEC3B,LTF,AGRN,SERPINA5
GO: Molecular Function	GO:0004175	endopeptidase activity		1.44e-11	1.429e-09	41	457	ACR,ADAM10,PGC,TPP1,PIP,MME,MMP2,ADAMTS1,APEH,KLK3,CFI,CTSB,CTSD,CTSH,CTSL,CTSZ,LGMN,CTSF,PRSS8,ERAP1,PSMA2,PSMA4,PSMA5,PSMA6,PSMB1,PSMB2,PSMB3,ACE,CFB,C3,C4A,CAPN5,KLK2,KLK11,DPP4,PDCD6,NCSTN,PDIA3,USP5,TMPRSS2,LTF
GO: Molecular Function	GO:0030246	carbohydrate binding		5.785e-11	5.022e-09	31	289	HEXB,MAN2A1,MAN2B1,MANBA,ACR,REG3G,PGD,FBP1,CLN5,UGP2,PGLS,ALDOA,PLOD1,ATRN,VTN,APCS,SLC2A5,IGF2R,CHID1,FUCA1,GAA,SORD,UAP1,GALM,PYGB,OS9,C4A,GPI,PLOD3,CALR,CLEC3B
GO: Molecular Function	GO:0005102	signaling receptor binding		3.291e-10	2.406e-08	86	1601	A2M,EPHX2,HSP90B1,PARK7,ACTN1,CHGB,PFN1,ADAM10,IGLL5,FAM3D,TTR,LRG1,EFEMP1,PIGR,SPON2,AGT,FAM3C,PRDX5,HSPA1A,HSPA8,SDCBP,VCP,HSP90AA1,HSP90AB1,SEMA3C,VTN,FMOD,ANG,FN1,ANXA1,GDF15,WNT7A,ANXA5,ANXA7,AGR2,APOA1,CPE,IDH1,APP,KLK3,YWHAG,YWHAH,ARF4,CARTPT,IGFBP4,IL6ST,PSAP,ERAP1,DBI,ACE,TMBIM1,PTN,GLA,PTPRF,GLG1,C3,GNB1,NOV,GPI,DPP4,ITCH,PDCD6IP,CALM1,CALR,ARHGEF12,LAMA5,LAMB2,FAM3B,ECM1,TF,PDIA3,LEFTY…
GO: Molecular Function	GO:0042277	peptide binding		3.667e-08	1.643e-06	26	278	TPP1,MME,ITM2B,PLOD1,HSPA8,ANG,ANPEP,FOLH1,ANXA5,APOA1,CLSTN1,PPIA,PPIB,PPIC,CST3,CTSB,CTSD,ERAP1,AZGP1,DPP4,CALR,GPX3,GSS,GSTM3,GSTP1,LNPEP
GO: Molecular Function	GO:0016491	oxidoreductase activity		4.103e-07	1.5e-05	45	749	HGD,AOC1,PARK7,AKR1A1,MDH1,PGD,TXN,ADH5,FASN,UGDH,ALDH1A1,PRDX5,PLOD1,ALOX15B,CP,IDH1,PRDX6,AKR7A2,CRYM,SOD1,SOD3,SORD,CYB561,GAPDH,SPR,STEAP2,CREG1,GDI2,PHGDH,BLVRB,QSOX1,ALKBH8,PLOD3,GPX3,STEAP4,TXNDC17,PRDX2,LDHA,LDHB,CBR1,PDIA3,LDHC,GSTT2,P4HB,PRDX1
GO: Molecular Function	GO:0061135	endopeptidase regulator activity		6.192e-16	2.768e-13	30	177	A2M,SERPINF1,CD109,SERPINA1,SERPINA4,WFDC2,AGT,PRDX5,SERPINF2,APLP2,APP,CST1,SLPI,CST3,CST4,CPAMD8,SPINK2,SPINT1,SPOCK1,SPINT3,PSME1,SPOCK3,SERPING1,C3,C4A,LCN1,TIMP1,TIMP2,PEBP1,SERPINA5
GO: Molecular Function	GO:0030414	peptidase inhibitor activity		9.965e-16	2.768e-13	30	180	A2M,SERPINF1,CD109,SERPINA1,SERPINA4,WFDC2,AGT,PRDX5,SERPINF2,APLP2,APP,CST1,SLPI,CST3,CST4,CPAMD8,SPINK2,SPINT1,SPOCK1,SPINT3,SPOCK3,SERPING1,C3,C4A,LCN1,PI15,TIMP1,TIMP2,PEBP1,SERPINA5
GO: Molecular Function	GO:0070011	peptidase activity, acting on L-amino acid peptides		1.646e-15	3.73e-13	58	661	ACR,ADAM10,PGC,CPQ,TPP1,UCHL3,PIP,MME,MMP2,CPVL,DPP7,ANPEP,ADAMTS1,FOLH1,APEH,CPD,CPE,CPZ,XPNPEP1,CPM,KLK3,CFI,PRCP,CNDP2,CTSB,CTSD,CTSH,CTSL,CTSZ,LGMN,CTSF,PRSS8,ERAP1,PSMA2,PSMA4,PSMA5,PSMA6,PSMB1,PSMB2,PSMB3,ACE,CFB,GGT1,GGH,C3,C4A,CAPN5,KLK2,KLK11,DPP4,PDCD6,NCSTN,PDIA3,USP5,LNPEP,TMPRSS2,SCPEP1,LTF
GO: Molecular Function	GO:0004866	endopeptidase inhibitor activity		1.88e-15	3.73e-13	29	171	A2M,SERPINF1,CD109,SERPINA1,SERPINA4,WFDC2,AGT,PRDX5,SERPINF2,APLP2,APP,CST1,SLPI,CST3,CST4,CPAMD8,SPINK2,SPINT1,SPOCK1,SPINT3,SPOCK3,SERPING1,C3,C4A,LCN1,TIMP1,TIMP2,PEBP1,SERPINA5
GO: Molecular Function	GO:0042802	identical protein binding		4.042e-13	6.239e-11	84	1359	HEXB,A2M,EPHX2,RIDA,AOC1,PARK7,ACPP,ACTB,TSG101,ACTN1,ADAM10,TTR,ADH5,S100A11,SERPINA1,FASN,FBP1,CPQ,HPRT1,UGP2,ALAD,ALB,ALDH1A1,BAIAP2,SERPINF2,ALDOA,PLOD1,NAXE,SDCBP,HSPB1,VCP,HSP90AA1,SUMF2,VTN,ANG,FN1,ANXA1,ANXA4,AGR2,OLFM4,APLP2,APOA1,XPNPEP1,VPS25,VWA1,IDH1,APOH,APP,YWHAZ,CRYM,IGF2R,CST3,PRKAR2A,IL6ST,SOD1,SORD,UAP1,IMPA1,GALM,GAPDH,SPR,B2M,GNPTG,B4GALT1,GLA,PYGB,GOT1,DPP4,PDCD6IP,PDCD6,COR…
GO: Molecular Function	GO:0030234	enzyme regulator activity		4.497e-13	6.246e-11	70	1023	A2M,RPLP1,PARK7,SERPINF1,CD109,PFN1,SERPINA1,SERPINA4,PLAA,WFDC2,AGT,ARHGAP29,ALDH1A1,PRDX5,SERPINF2,HSPB1,VCP,HSP90AA1,HSP90AB1,FN1,ANXA1,ANXA2,ANXA3,ANXA4,ANXA5,APLP2,APOA1,APOH,APP,YWHAG,PPP1R7,PPP2R1A,CST1,SLPI,CST3,CST4,PRKAR2A,CTSH,DNAJC3,CPAMD8,PSAP,SPINK2,SPINT1,ACRBP,SPOCK1,SPINT3,PSME1,GDI2,IQGAP1,PTN,SPOCK3,SERPING1,GM2A,C3,C4A,RAB3A,SFN,CALM1,ARHGEF12,LCN1,TMBIM6,PI15,GSTP1,RNH1,TIMP1…
GO: Molecular Function	GO:0005539	glycosaminoglycan binding		7.716e-12	8.913e-10	28	219	AOC1,LIPG,BSPH1,VTN,FMOD,ANG,FN1,ADAMTS1,APLP2,PODXL2,APOH,APP,SOD3,SMOC2,PTN,PTPRF,SPOCK3,GNS,NOV,CRISPLD2,TGFBR3,THBS1,FSTL1,LPL,CLEC3B,LTF,AGRN,SERPINA5
GO: Molecular Function	GO:0004867	serine-type endopeptidase inhibitor activity		8.342e-12	8.913e-10	19	96	A2M,SERPINF1,CD109,SERPINA1,SERPINA4,WFDC2,AGT,SERPINF2,APLP2,APP,SLPI,CPAMD8,SPINK2,SPINT1,SPOCK1,SPINT3,SERPING1,PEBP1,SERPINA5
GO: Molecular Function	GO:0008201	heparin binding		2.04e-11	1.889e-09	24	167	AOC1,LIPG,BSPH1,VTN,FMOD,ANG,FN1,ADAMTS1,APLP2,APOH,APP,SOD3,SMOC2,PTN,PTPRF,NOV,CRISPLD2,TGFBR3,THBS1,FSTL1,LPL,CLEC3B,LTF,SERPINA5
GO: Molecular Function	GO:0008236	serine-type peptidase activity		8.523e-11	6.964e-09	28	242	ACR,TPP1,MMP2,CPVL,DPP7,APEH,CPD,CPE,CPZ,CPM,KLK3,CFI,PRCP,CTSB,CTSD,CTSH,CTSL,PRSS8,ACE,CFB,C3,C4A,KLK2,KLK11,DPP4,TMPRSS2,SCPEP1,LTF
GO: Molecular Function	GO:0017171	serine hydrolase activity		1.14e-10	8.798e-09	28	245	ACR,TPP1,MMP2,CPVL,DPP7,APEH,CPD,CPE,CPZ,CPM,KLK3,CFI,PRCP,CTSB,CTSD,CTSH,CTSL,PRSS8,ACE,CFB,C3,C4A,KLK2,KLK11,DPP4,TMPRSS2,SCPEP1,LTF
GO: Molecular Function	GO:0016798	hydrolase activity, acting on glycosyl bonds		3.554e-10	2.469e-08	25	207	HEXA,HEXB,MAN2A1,MAN2B1,MANBA,B4GALT5,PLA1A,PRDX6,CTBS,SMPD1,CHID1,FUCA1,FUCA2,GAA,GLB1L,NAGLU,ACE,B4GALT1,NEU1,GLA,GLB1,GM2A,CD38,LYZ,SPACA3
GO: Molecular Function	GO:0004180	carboxypeptidase activity		4.788e-10	3.099e-08	12	41	CPQ,CPVL,DPP7,FOLH1,CPD,CPE,CPZ,CPM,PRCP,CNDP2,ACE,SCPEP1
GO: Molecular Function	GO:0031489	myosin V binding		4.908e-10	3.099e-08	9	19	MLPH,RAB3D,RAB6B,RAB11A,RAB10,RAB3A,RAB3B,RAB27A,RAB27B
GO: Molecular Function	GO:0098772	molecular function regulator		5.446e-10	3.289e-08	79	1430	A2M,RPLP1,PARK7,SERPINF1,CD109,PFN1,SERPINA1,SERPINA4,PLAA,WFDC2,CRISP1,AGT,ARHGAP29,ALDH1A1,PRDX5,SERPINF2,HSPB1,VCP,HSP90AA1,HSP90AB1,FN1,ANXA1,ANXA2,ANXA3,ANXA4,WNT7A,ANXA5,APLP2,APOA1,APOH,APP,YWHAE,YWHAG,YWHAH,DIS3,ARF4,PPP1R7,PPP2R1A,CST1,SLPI,CST3,CST4,PRKAR2A,CTSH,DNAJC3,CPAMD8,PRSS8,PSAP,SPINK2,SPINT1,ACRBP,SPOCK1,SPINT3,PSME1,GDI2,IQGAP1,PTN,SPOCK3,SERPING1,GM2A,C3,C4A,GNB2,RAB3A,SFN,CA…
GO: Molecular Function	GO:0004185	serine-type carboxypeptidase activity		6.655e-10	3.851e-08	8	14	CPVL,DPP7,CPD,CPE,CPZ,CPM,PRCP,SCPEP1
GO: Molecular Function	GO:0004553	hydrolase activity, hydrolyzing O-glycosyl compounds		7.382e-10	4.101e-08	23	182	HEXA,HEXB,MAN2A1,MAN2B1,MANBA,B4GALT5,PLA1A,PRDX6,CTBS,CHID1,FUCA1,FUCA2,GAA,GLB1L,NAGLU,ACE,B4GALT1,NEU1,GLA,GLB1,GM2A,LYZ,SPACA3
GO: Molecular Function	GO:0002020	protease binding		1.662e-09	8.88e-08	18	115	A2M,ACR,PARK7,SERPINA1,SERPINF2,HSPA1A,VCP,SEMG2,FN1,ANXA2,CST3,OS9,DPP4,LCN2,ECM1,TIMP1,TIMP2,SERPINA5
GO: Molecular Function	GO:0051082	unfolded protein binding		2.041e-09	1.05e-07	17	103	HSP90B1,HSPA1A,HSPA2,HSPA5,HSPA6,HSPA8,HSP90AA1,HSP90AB1,APCS,CCT2,PPIA,PPIB,CCT5,PTGES3,CALR,SIL1,CCT6A
GO: Molecular Function	GO:0019899	enzyme binding		3.181e-09	1.578e-07	95	1929	A2M,HSP90B1,ACR,PARK7,ACTB,TSG101,PFN1,ADAM10,PGAM1,TXN,CKB,SERPINA1,CLU,UBE2V2,ALB,SERPINF2,HSPA1A,MLPH,HSPA2,HSPA5,HSPA6,HSPA8,HSPB1,VCL,VCP,HSP90AA1,HSP90AB1,EZR,SEMG2,FN1,ANXA2,ANXA5,RAB3D,APOA1,CCT2,NPC2,CPD,APP,PPIB,YWHAB,YWHAE,YWHAG,YWHAH,YWHAZ,PRDX6,PPP1CB,CUTA,IGF2R,RUVBL1,SLPI,CST3,PRKAR2A,PTGES3,DNAJC3,SOD1,NAP1L1,ACE,GDI2,IQGAP1,B4GALT1,PTPRF,RAB7A,OS9,KIF5B,GNB1,NME2,GNB2,RAB3A,SFN,G…
GO: Molecular Function	GO:0048306	calcium-dependent protein binding		4.114e-09	1.97e-07	14	70	A2M,TSG101,S100A11,ANXA1,ANXA2,ANXA3,ANXA4,ANXA7,ANXA11,VPS37C,PDCD6IP,PDCD6,CALM1,VPS37B
GO: Molecular Function	GO:0070008	serine-type exopeptidase activity		1.488e-08	6.887e-07	8	19	CPVL,DPP7,CPD,CPE,CPZ,CPM,PRCP,SCPEP1
GO: Molecular Function	GO:0033218	amide binding		8.229e-08	3.505e-06	27	309	FASN,TPP1,MME,ITM2B,PLOD1,HSPA8,ANG,ANPEP,FOLH1,ANXA5,APOA1,CLSTN1,PPIA,PPIB,PPIC,CST3,CTSB,CTSD,ERAP1,AZGP1,DPP4,CALR,GPX3,GSS,GSTM3,GSTP1,LNPEP
GO: Molecular Function	GO:0005509	calcium ion binding		8.327e-08	3.505e-06	45	708	HSP90B1,AOC1,MATN2,ACTN1,S100A11,FBLN2,EFEMP1,PLA2G2A,SPARCL1,HSPA5,PLS3,ALOX15B,ANXA1,ANXA2,ANXA3,ANXA4,ANXA5,ANXA7,ANXA11,APCS,CLSTN1,ARSA,EPDR1,MYL6,SPOCK1,SMOC2,IQGAP1,CANT1,SPOCK3,DSC2,PDCD6,CALM1,CALR,NUCB1,CAPS,CRTAC1,LCP1,SYT7,GSN,THBS1,FSTL1,CLEC3B,SYTL1,CDH1,AGRN
GO: Molecular Function	GO:0023026	MHC class II protein complex binding		8.942e-08	3.653e-06	7	16	PKM,HSPA8,HSP90AA1,HSP90AB1,ANXA11,YWHAE,CD81
GO: Molecular Function	GO:0008235	metalloexopeptidase activity		1.288e-07	5.11e-06	11	53	CPQ,ANPEP,FOLH1,CPD,CPE,CPZ,XPNPEP1,CPM,ERAP1,ACE,LNPEP
GO: Molecular Function	GO:0048029	monosaccharide binding		1.969e-07	7.595e-06	13	80	MAN2B1,MANBA,ACR,FBP1,CLN5,UGP2,PGLS,ALDOA,PLOD1,SLC2A5,IGF2R,GPI,PLOD3
GO: Molecular Function	GO:0023023	MHC protein complex binding		3.672e-07	1.378e-05	7	19	PKM,HSPA8,HSP90AA1,HSP90AB1,ANXA11,YWHAE,CD81
GO: Molecular Function	GO:0008289	lipid binding		4.314e-07	1.519e-05	43	701	RIDA,CFL1,PFN1,ADH5,MVB12A,SPON2,PLA2G2A,ALB,ALDH1A1,HSPA2,HSPA8,VCP,ALOX15B,ANXA1,ANXA2,ANXA3,ANXA4,ANXA5,ANXA7,ANXA11,APOA1,NPC2,APOD,APOH,ZFYVE28,IGF2R,BPIFB2,PSAP,STARD10,GC,DBI,PTGDS,IQGAP1,C3,NME2,LAMC1,SYT7,THBS1,CD14,PEBP1,LPL,SYTL1,SERPINA5
GO: Molecular Function	GO:0042803	protein homodimerization activity		4.374e-07	1.519e-05	48	826	HEXB,A2M,EPHX2,RIDA,AOC1,PARK7,ACPP,TSG101,ACTN1,ADAM10,ADH5,S100A11,FASN,CPQ,HPRT1,SERPINF2,PLOD1,NAXE,SDCBP,HSP90AA1,SUMF2,ANG,ANXA1,AGR2,OLFM4,XPNPEP1,VPS25,IDH1,CRYM,PRKAR2A,IL6ST,SOD1,IMPA1,GALM,SPR,GNPTG,B4GALT1,GLA,PYGB,DPP4,PDCD6IP,PDCD6,LCN2,GSS,GSTM3,NAMPT,PRDX1,ENO1
GO: Molecular Function	GO:0051920	peroxiredoxin activity		7.163e-07	2.427e-05	5	8	PARK7,PRDX5,PRDX6,PRDX2,PRDX1
GO: Molecular Function	GO:0016616	oxidoreductase activity, acting on the CH-OH group of donors, NAD or NADP as acceptor		7.84e-07	2.553e-05	15	120	AKR1A1,MDH1,PGD,ADH5,FASN,UGDH,IDH1,AKR7A2,SORD,SPR,PHGDH,LDHA,LDHB,CBR1,LDHC
GO: Molecular Function	GO:0070003	threonine-type peptidase activity		8.087e-07	2.553e-05	7	21	PSMA2,PSMA4,PSMA5,PSMA6,PSMB1,PSMB2,PSMB3
GO: Molecular Function	GO:0004298	threonine-type endopeptidase activity		8.087e-07	2.553e-05	7	21	PSMA2,PSMA4,PSMA5,PSMA6,PSMB1,PSMB2,PSMB3
GO: Molecular Function	GO:0050839	cell adhesion molecule binding		8.964e-07	2.767e-05	20	208	ACTN1,ADAM10,SDCBP,VCL,EZR,VTN,FN1,ANXA7,OLFM4,CPE,NOV,CALR,LAMA5,LAMB2,THBS1,CD9,TIMP2,P4HB,TSPAN8,CDH1
GO: Molecular Function	GO:0003924	GTPase activity		1.701e-06	5.137e-05	21	236	TUBB4A,RAB3D,RAB6B,ARF3,ARF4,RAB21,RAB11A,RAB10,RAB7A,GNB1,GNB2,RAB1A,RAB2A,RAB3A,RAB3B,RAB27A,RAB27B,RAP1B,TUBA1C,EEF2,CDC42
GO: Molecular Function	GO:0005507	copper ion binding		4.021e-06	0.0001188	10	60	AOC1,ACR,PARK7,ALB,ANG,CP,CUTA,SOD1,SOD3,GPC1
GO: Molecular Function	GO:0005178	integrin binding		4.614e-06	0.0001335	14	121	ACTN1,ADAM10,VTN,FN1,ANXA7,NOV,CALR,LAMA5,LAMB2,THBS1,CD9,TIMP2,P4HB,TSPAN8
GO: Molecular Function	GO:0055102	lipase inhibitor activity		5.126e-06	0.0001453	6	18	ANXA1,ANXA2,ANXA3,ANXA4,ANXA5,APOA1
GO: Molecular Function	GO:0016209	antioxidant activity		5.546e-06	0.0001541	11	76	PARK7,ALB,PRDX5,PRDX6,SOD1,SOD3,GPX3,TXNDC17,PRDX2,GSTT2,PRDX1
GO: Molecular Function	GO:0004252	serine-type endopeptidase activity		5.841e-06	0.0001591	19	215	ACR,TPP1,MMP2,APEH,KLK3,CFI,CTSB,CTSD,CTSH,CTSL,PRSS8,CFB,C3,C4A,KLK2,KLK11,DPP4,TMPRSS2,LTF
GO: Molecular Function	GO:0019838	growth factor binding		6.608e-06	0.0001765	15	142	A2M,CD109,SDCBP,IGF2R,IGFBP4,IGFBP5,IL6ST,PTN,GLG1,NOV,GPC1,TGFBR3,LIFR,THBS1,AGRN
GO: Molecular Function	GO:0031406	carboxylic acid binding		8.081e-06	0.0002118	20	240	RIDA,AARS,DDAH1,PGD,ADH5,ALB,PLOD1,HSPA8,YWHAB,YWHAE,IGF2R,PTGDS,GLRA2,NME2,GOT1,PLOD3,GSS,THBS1,AGRN,SERPINA5
GO: Molecular Function	GO:0016788	hydrolase activity, acting on ester bonds		8.782e-06	0.0002259	43	788	EPHX2,RIDA,AARS,CES5A,ESD,PARK7,ACPP,PGAM1,SIAE,FASN,FBP1,PLA1A,LIPG,PGLS,PLA2G2A,ANG,MINPP1,DIS3,PRDX6,PPP1CB,PPP2R1A,ARSA,PLPP1,RNASET2,NT5C2,SMPD1,IMPA1,GALNS,AZGP1,FBP2,PTPRF,PTPRS,SMPDL3A,GNB1,GNS,DNASE2,CA2,RNASE13,PDIA3,RNASE1,LIPA,RNASE4,LPL
GO: Molecular Function	GO:0016614	oxidoreductase activity, acting on CH-OH group of donors		9.287e-06	0.0002345	15	146	AKR1A1,MDH1,PGD,ADH5,FASN,UGDH,IDH1,AKR7A2,SORD,SPR,PHGDH,LDHA,LDHB,CBR1,LDHC
GO: Molecular Function	GO:0043177	organic acid binding		9.719e-06	0.0002411	20	243	RIDA,AARS,DDAH1,PGD,ADH5,ALB,PLOD1,HSPA8,YWHAB,YWHAE,IGF2R,PTGDS,GLRA2,NME2,GOT1,PLOD3,GSS,THBS1,AGRN,SERPINA5
GO: Molecular Function	GO:0017022	myosin binding		1.28e-05	0.0003119	10	68	MLPH,RAB3D,RAB6B,RAB11A,RAB10,RAB3A,RAB3B,RAB27A,RAB27B,GSN
GO: Molecular Function	GO:0001848	complement binding		1.399e-05	0.000335	6	21	APCS,CFB,SERPING1,C4A,CALR,CD59
GO: Molecular Function	GO:0044548	S100 protein binding		1.472e-05	0.0003408	5	13	S100A11,EZR,ANXA2,ANXA11,IQGAP1
GO: Molecular Function	GO:0004859	phospholipase inhibitor activity		1.472e-05	0.0003408	5	13	ANXA1,ANXA2,ANXA3,ANXA4,ANXA5
GO: Molecular Function	GO:0005544	calcium-dependent phospholipid binding		1.663e-05	0.0003788	9	56	ANXA1,ANXA2,ANXA3,ANXA4,ANXA5,ANXA7,ANXA11,SYT7,SYTL1
GO: Molecular Function	GO:0004197	cysteine-type endopeptidase activity		1.861e-05	0.000417	11	86	CTSB,CTSD,CTSH,CTSL,CTSZ,LGMN,CTSF,CAPN5,PDCD6,PDIA3,USP5
GO: Molecular Function	GO:0004177	aminopeptidase activity		1.932e-05	0.000426	8	44	DPP7,ANPEP,XPNPEP1,PRCP,CTSH,ERAP1,DPP4,LNPEP
GO: Molecular Function	GO:0008426	protein kinase C inhibitor activity		1.978e-05	0.0004293	3	3	HSPB1,YWHAG,SFN
GO: Molecular Function	GO:0048037	cofactor binding		2.046e-05	0.0004372	21	277	AOC1,ACLY,MDH1,PGD,FASN,UGDH,ALB,IDH1,CRYM,SORD,GAPDH,SPR,DBI,CREG1,PHGDH,PYGB,C3,GOT1,LDHA,LDHB,LMO2
GO: Molecular Function	GO:0016684	oxidoreductase activity, acting on peroxide as acceptor		3.195e-05	0.0006718	8	47	PARK7,PRDX5,PRDX6,GPX3,TXNDC17,PRDX2,GSTT2,PRDX1
GO: Molecular Function	GO:0015928	fucosidase activity		3.24e-05	0.0006718	6	24	MAN2B1,CTBS,FUCA1,FUCA2,GLB1L,ACE
GO: Molecular Function	GO:0043394	proteoglycan binding		3.376e-05	0.0006896	7	35	CTSB,CTSL,PTN,PTPRF,GPC1,THBS1,AGRN
GO: Molecular Function	GO:1900750	oligopeptide binding		4.673e-05	0.0009408	5	16	FOLH1,GPX3,GSS,GSTM3,GSTP1
GO: Molecular Function	GO:0008237	metallopeptidase activity		4.985e-05	0.0009892	16	188	ADAM10,CPQ,MME,MMP2,ANPEP,ADAMTS1,FOLH1,CPD,CPE,CPZ,XPNPEP1,CPM,CNDP2,ERAP1,ACE,LNPEP
GO: Molecular Function	GO:0015925	galactosidase activity		5.296e-05	0.001036	6	26	MAN2B1,CTBS,GLB1L,ACE,GLA,GLB1
GO: Molecular Function	GO:0016853	isomerase activity		5.638e-05	0.001088	15	170	PGAM1,PGM1,NAXE,PPIA,PPIB,PPIC,PTGES3,GALM,PTGDS,DDT,QSOX1,GPI,PDIA3,P4HB,TPI1
GO: Molecular Function	GO:0015923	mannosidase activity		6.798e-05	0.001294	8	52	MAN2A1,MAN2B1,MANBA,PLA1A,PRDX6,CTBS,GLB1L,ACE
GO: Molecular Function	GO:0046983	protein dimerization activity		7.352e-05	0.00138	59	1317	HEXA,HEXB,A2M,EPHX2,RIDA,AOC1,PARK7,ACPP,TSG101,ACTN1,ADAM10,TTR,ADH5,S100A11,FASN,CPQ,HPRT1,PIP,PRDX5,SERPINF2,PLOD1,NAXE,SDCBP,HSP90AA1,SUMF2,ANG,ANXA1,AGR2,OLFM4,XPNPEP1,VPS25,IDH1,YWHAE,YWHAH,PPP2R1A,CRYM,PRKAR2A,IL6ST,SOD1,IMPA1,GALM,SPR,GARS,DBI,GNPTG,B4GALT1,GLA,PYGB,DPP4,PDCD6IP,PDCD6,LCN2,GSS,GSTM3,LIFR,NAMPT,P4HB,PRDX1,ENO1
GO: Molecular Function	GO:0019834	phospholipase A2 inhibitor activity		7.543e-05	0.001397	3	4	ANXA1,ANXA2,ANXA3
GO: Molecular Function	GO:0008144	drug binding		7.722e-05	0.001411	13	136	AOC1,ACR,FASN,ALB,HSP90AB1,PPIA,PPIC,ACE,PYGB,NME2,PNP,GSTP1,NAMPT
GO: Molecular Function	GO:0003823	antigen binding		9.37e-05	0.001688	12	120	IGLL5,SPON2,PKM,HSPA8,HSP90AA1,HSP90AB1,ANXA11,YWHAE,PPP2R1A,AZGP1,GP2,CD81
GO: Molecular Function	GO:0016892	endoribonuclease activity, producing 3'-phosphomonoesters		9.479e-05	0.001688	4	10	RIDA,RNASET2,RNASE1,RNASE4
GO: Molecular Function	GO:0016860	intramolecular oxidoreductase activity		0.0001025	0.001802	8	55	PTGES3,PTGDS,DDT,QSOX1,GPI,PDIA3,P4HB,TPI1
GO: Molecular Function	GO:0005537	mannose binding		0.0001164	0.002021	5	19	MAN2B1,MANBA,ACR,CLN5,IGF2R
GO: Molecular Function	GO:0051287	NAD binding		0.0001327	0.002276	8	57	MDH1,UGDH,IDH1,SORD,GAPDH,PHGDH,LDHA,LDHB
GO: Molecular Function	GO:0046790	virion binding		0.0001458	0.00247	4	11	HSP90B1,TSG101,APCS,PPIA
GO: Molecular Function	GO:0016894	endonuclease activity, active with either ribo- or deoxyribonucleic acids and producing 3'-phosphomonoesters		0.0001518	0.00254	5	20	RIDA,RNASET2,DNASE2,RNASE1,RNASE4
GO: Molecular Function	GO:0019904	protein domain specific binding		0.0001662	0.002748	37	729	ACTN1,ADAM10,MVB12A,BASP1,ARHGAP29,BAIAP2,HSPA1A,HSPA5,HSPA8,VCP,HSP90AA1,HSP90AB1,EZR,CPE,APP,YWHAB,YWHAE,YWHAG,YWHAH,YWHAZ,PRKAR2A,IQGAP1,F11R,YWHAQ,RAB27A,RAB27B,SFN,PDCD6IP,CALM1,LAMP1,LAMP2,GSN,TGFBR3,CCT6A,MPP5,CLEC3B,CDH1
GO: Molecular Function	GO:0019003	GDP binding		0.00017	0.002778	8	59	RAB21,RAB10,RAB7A,RAB2A,RAB3B,RAB27A,RAB27B,RAP1B
GO: Molecular Function	GO:0004601	peroxidase activity		0.0001807	0.002884	7	45	PRDX5,PRDX6,GPX3,TXNDC17,PRDX2,GSTT2,PRDX1
GO: Molecular Function	GO:0004563	beta-N-acetylhexosaminidase activity		0.0001848	0.002884	3	5	HEXA,HEXB,GM2A
GO: Molecular Function	GO:0032557	pyrimidine ribonucleotide binding		0.0001848	0.002884	3	5	UGP2,HSP90AA1,HSP90AB1
GO: Molecular Function	GO:0004459	L-lactate dehydrogenase activity		0.0001848	0.002884	3	5	LDHA,LDHB,LDHC
GO: Molecular Function	GO:0015929	hexosaminidase activity		0.0001956	0.003019	10	93	HEXA,HEXB,MAN2B1,B4GALT5,CTBS,GLB1L,NAGLU,ACE,B4GALT1,GM2A
GO: Molecular Function	GO:0051787	misfolded protein binding		0.0003027	0.00462	4	13	DNAJB9,CLU,HSPA5,DNAJC3
GO: Molecular Function	GO:0017111	nucleoside-triphosphatase activity		0.0003472	0.00524	38	785	TUBB4A,CLU,HSPA1A,HSPA5,HSPA6,HSPA8,VCP,HSP90AA1,ANXA1,ANXA5,RAB3D,RAB6B,ARF3,ARF4,DHX30,RUVBL1,RAB21,ATP6V1A,MYL6,MYO6,RAB11A,PSMC3,PSMC4,RAB10,RAB7A,KIF5B,GNB1,GNB2,RAB1A,RAB2A,RAB3A,RAB3B,RAB27A,RAB27B,RAP1B,TUBA1C,EEF2,CDC42
GO: Molecular Function	GO:0015924	mannosyl-oligosaccharide mannosidase activity		0.0003544	0.00524	7	50	MAN2A1,MAN2B1,PLA1A,PRDX6,CTBS,GLB1L,ACE
GO: Molecular Function	GO:0004457	lactate dehydrogenase activity		0.0003622	0.00524	3	6	LDHA,LDHB,LDHC
GO: Molecular Function	GO:0008379	thioredoxin peroxidase activity		0.0003622	0.00524	3	6	PRDX5,PRDX2,PRDX1
GO: Molecular Function	GO:0070324	thyroid hormone binding		0.0003622	0.00524	3	6	TTR,CRYM,CTSH
GO: Molecular Function	GO:0016836	hydro-lyase activity		0.0003738	0.005352	8	66	ACO1,PARK7,FASN,ALAD,FH,CA2,CA4,ENO1
GO: Molecular Function	GO:0004559	alpha-mannosidase activity		0.0004014	0.005689	7	51	MAN2A1,MAN2B1,PLA1A,PRDX6,CTBS,GLB1L,ACE
GO: Molecular Function	GO:0008191	metalloendopeptidase inhibitor activity		0.0004148	0.005819	4	14	SPOCK1,SPOCK3,TIMP1,TIMP2
GO: Molecular Function	GO:0031625	ubiquitin protein ligase binding		0.0004432	0.006156	18	273	TSG101,CKB,CLU,UBE2V2,HSPA1A,HSPA5,HSPA8,VCL,VCP,CCT2,YWHAE,YWHAZ,PRDX6,PRKAR2A,GPI,CALR,TMBIM6,TPI1
GO: Molecular Function	GO:0052689	carboxylic ester hydrolase activity		0.0004675	0.006429	13	163	AARS,CES5A,ESD,PARK7,SIAE,PLA1A,LIPG,PGLS,PLA2G2A,PRDX6,CA2,LIPA,LPL
GO: Molecular Function	GO:0016462	pyrophosphatase activity		0.0004851	0.006606	39	827	TUBB4A,CLU,HSPA1A,HSPA5,HSPA6,HSPA8,VCP,HSP90AA1,ANXA1,ANXA5,RAB3D,RAB6B,ARF3,ARF4,DHX30,RUVBL1,RAB21,ATP6V1A,MYL6,MYO6,RAB11A,PSMC3,PSMC4,RAB10,CANT1,RAB7A,KIF5B,GNB1,GNB2,RAB1A,RAB2A,RAB3A,RAB3B,RAB27A,RAB27B,RAP1B,TUBA1C,EEF2,CDC42
GO: Molecular Function	GO:0016818	hydrolase activity, acting on acid anhydrides, in phosphorus-containing anhydrides		0.0005082	0.006807	39	829	TUBB4A,CLU,HSPA1A,HSPA5,HSPA6,HSPA8,VCP,HSP90AA1,ANXA1,ANXA5,RAB3D,RAB6B,ARF3,ARF4,DHX30,RUVBL1,RAB21,ATP6V1A,MYL6,MYO6,RAB11A,PSMC3,PSMC4,RAB10,CANT1,RAB7A,KIF5B,GNB1,GNB2,RAB1A,RAB2A,RAB3A,RAB3B,RAB27A,RAB27B,RAP1B,TUBA1C,EEF2,CDC42
GO: Molecular Function	GO:0008092	cytoskeletal protein binding		0.0005097	0.006807	41	886	CFL1,ACTB,ACTN1,PFN1,PIP,BAIAP2,ALDOA,MLPH,PLS3,SDCBP,VCL,CAP1,HSP90AA1,EZR,ANG,ANXA2,RAB3D,CLSTN1,RAB6B,YWHAH,CCT5,GAPDH,MYO6,RAB11A,GC,ACE,B4GALT1,RAB10,KIF5B,GNB1,RAB3A,RAB3B,RAB27A,RAB27B,CALM1,CAPZA1,CORO1B,LCP1,GSN,EEF2,CDH1
GO: Molecular Function	GO:0016817	hydrolase activity, acting on acid anhydrides		0.0005201	0.00688	39	830	TUBB4A,CLU,HSPA1A,HSPA5,HSPA6,HSPA8,VCP,HSP90AA1,ANXA1,ANXA5,RAB3D,RAB6B,ARF3,ARF4,DHX30,RUVBL1,RAB21,ATP6V1A,MYL6,MYO6,RAB11A,PSMC3,PSMC4,RAB10,CANT1,RAB7A,KIF5B,GNB1,GNB2,RAB1A,RAB2A,RAB3A,RAB3B,RAB27A,RAB27B,RAP1B,TUBA1C,EEF2,CDC42
GO: Molecular Function	GO:0044389	ubiquitin-like protein ligase binding		0.0005264	0.006898	18	277	TSG101,CKB,CLU,UBE2V2,HSPA1A,HSPA5,HSPA8,VCL,VCP,CCT2,YWHAE,YWHAZ,PRDX6,PRKAR2A,GPI,CALR,TMBIM6,TPI1
GO: Molecular Function	GO:0043295	glutathione binding		0.0005536	0.00712	4	15	GPX3,GSS,GSTM3,GSTP1
GO: Molecular Function	GO:0044183	protein binding involved in protein folding		0.0005536	0.00712	4	15	HSPA1A,CCT2,CALR,CCT6A
GO: Molecular Function	GO:0005525	GTP binding		0.0006054	0.007715	22	378	TUBB4A,HSP90AA1,HSP90AB1,RAB3D,RAB6B,ARF3,ARF4,RHOC,RAB21,RAB11A,RAB10,RAB7A,RAB1A,RAB2A,RAB3A,RAB3B,RAB27A,RAB27B,RAP1B,TUBA1C,EEF2,CDC42
GO: Molecular Function	GO:0090599	alpha-glucosidase activity		0.0006768	0.008397	5	27	MAN2B1,CTBS,GAA,GLB1L,ACE
GO: Molecular Function	GO:0004181	metallocarboxypeptidase activity		0.0006768	0.008397	5	27	FOLH1,CPD,CPE,CPZ,CPM
GO: Molecular Function	GO:0005518	collagen binding		0.0006771	0.008397	8	72	VTN,FN1,PPIB,CTSB,CTSL,GPC1,DPP4,THBS1
GO: Molecular Function	GO:0050840	extracellular matrix binding		0.0007166	0.008634	7	56	FBLN2,VTN,LYPD3,GPC1,ECM1,THBS1,AGRN
GO: Molecular Function	GO:0016805	dipeptidase activity		0.0007226	0.008634	4	16	CPQ,FOLH1,CNDP2,ACE
GO: Molecular Function	GO:0043531	ADP binding		0.0007356	0.008634	6	41	PGK1,PKM,HSPA8,VCP,RUVBL1,MYO6
GO: Molecular Function	GO:0004923	leukemia inhibitory factor receptor activity		0.0007397	0.008634	2	2	IL6ST,LIFR
GO: Molecular Function	GO:0042132	fructose 1,6-bisphosphate 1-phosphatase activity		0.0007397	0.008634	2	2	FBP1,FBP2
GO: Molecular Function	GO:0004560	alpha-L-fucosidase activity		0.0007397	0.008634	2	2	FUCA1,FUCA2
GO: Molecular Function	GO:0002135	CTP binding		0.0007397	0.008634	2	2	HSP90AA1,HSP90AB1
GO: Molecular Function	GO:0004869	cysteine-type endopeptidase inhibitor activity		0.0008872	0.01027	7	58	WFDC2,PRDX5,CST1,CST3,CST4,SPOCK1,LCN1
GO: Molecular Function	GO:0070006	metalloaminopeptidase activity		0.000925	0.01062	4	17	ANPEP,XPNPEP1,ERAP1,LNPEP
GO: Molecular Function	GO:0016504	peptidase activator activity		0.0009533	0.01085	6	43	VCP,FN1,APP,CTSH,ACRBP,PSME1
GO: Molecular Function	GO:0031995	insulin-like growth factor II binding		0.000974	0.01091	3	8	IGF2R,IGFBP4,IGFBP5
GO: Molecular Function	GO:0001849	complement component C1q binding		0.000974	0.01091	3	8	APCS,C4A,CALR
GO: Molecular Function	GO:0050431	transforming growth factor beta binding		0.001164	0.01283	4	18	CD109,TGFBR3,THBS1,AGRN
GO: Molecular Function	GO:0016722	oxidoreductase activity, oxidizing metal ions		0.001164	0.01283	4	18	CP,CYB561,STEAP2,STEAP4
GO: Molecular Function	GO:0032561	guanyl ribonucleotide binding		0.001225	0.0134	22	399	TUBB4A,HSP90AA1,HSP90AB1,RAB3D,RAB6B,ARF3,ARF4,RHOC,RAB21,RAB11A,RAB10,RAB7A,RAB1A,RAB2A,RAB3A,RAB3B,RAB27A,RAB27B,RAP1B,TUBA1C,EEF2,CDC42
GO: Molecular Function	GO:0033293	monocarboxylic acid binding		0.001254	0.01361	8	79	RIDA,ADH5,ALB,HSPA8,IGF2R,PTGDS,NME2,SERPINA5
GO: Molecular Function	GO:0019001	guanyl nucleotide binding		0.001265	0.01362	22	400	TUBB4A,HSP90AA1,HSP90AB1,RAB3D,RAB6B,ARF3,ARF4,RHOC,RAB21,RAB11A,RAB10,RAB7A,RAB1A,RAB2A,RAB3A,RAB3B,RAB27A,RAB27B,RAP1B,TUBA1C,EEF2,CDC42
GO: Molecular Function	GO:0016765	transferase activity, transferring alkyl or aryl (other than methyl) groups		0.001455	0.01555	7	63	CLIC1,SMS,GSTM3,GSTP1,GSTT2,EEF1G,NANS
GO: Molecular Function	GO:0043236	laminin binding		0.001512	0.01603	5	32	LYPD3,GPC1,ECM1,THBS1,AGRN
GO: Molecular Function	GO:0005504	fatty acid binding		0.001534	0.01614	6	47	RIDA,ADH5,ALB,HSPA8,PTGDS,NME2
GO: Molecular Function	GO:0051087	chaperone binding		0.001597	0.01668	8	82	CLU,ALB,HSPA5,HYOU1,CP,DNAJC3,SOD1,CALR
GO: Molecular Function	GO:0050661	NADP binding		0.001714	0.01777	6	48	PGD,FASN,IDH1,CRYM,GAPDH,SPR
GO: Molecular Function	GO:0019955	cytokine binding		0.001815	0.01868	9	103	A2M,PARK7,CD109,IL6ST,TGFBR3,LIFR,THBS1,IL1RL1,AGRN
GO: Molecular Function	GO:0004364	glutathione transferase activity		0.001999	0.0199	5	34	CLIC1,GSTM3,GSTP1,GSTT2,EEF1G
GO: Molecular Function	GO:0015926	glucosidase activity		0.001999	0.0199	5	34	MAN2B1,CTBS,GAA,GLB1L,ACE
GO: Molecular Function	GO:0002162	dystroglycan binding		0.002005	0.0199	3	10	VCL,AGR2,AGRN
GO: Molecular Function	GO:0030235	nitric-oxide synthase regulator activity		0.002005	0.0199	3	10	HSP90AA1,HSP90AB1,CALM1
GO: Molecular Function	GO:0050662	coenzyme binding		0.002106	0.0199	13	192	MDH1,PGD,FASN,UGDH,IDH1,CRYM,SORD,GAPDH,SPR,DBI,PHGDH,LDHA,LDHB
GO: Molecular Function	GO:0070573	metallodipeptidase activity		0.00212	0.0199	2	3	CPQ,ACE
GO: Molecular Function	GO:0008428	ribonuclease inhibitor activity		0.00212	0.0199	2	3	TMBIM6,RNH1
GO: Molecular Function	GO:0008240	tripeptidyl-peptidase activity		0.00212	0.0199	2	3	TPP1,ACE
GO: Molecular Function	GO:0017098	sulfonylurea receptor binding		0.00212	0.0199	2	3	HSP90AA1,HSP90AB1
GO: Molecular Function	GO:0002060	purine nucleobase binding		0.00212	0.0199	2	3	APRT,PNP
GO: Molecular Function	GO:0035373	chondroitin sulfate proteoglycan binding		0.00212	0.0199	2	3	PTN,PTPRF
GO: Molecular Function	GO:0004924	oncostatin-M receptor activity		0.00212	0.0199	2	3	IL6ST,LIFR
GO: Molecular Function	GO:0008475	procollagen-lysine 5-dioxygenase activity		0.00212	0.0199	2	3	PLOD1,PLOD3
GO: Molecular Function	GO:0016835	carbon-oxygen lyase activity		0.002332	0.02174	8	87	ACO1,PARK7,FASN,ALAD,FH,CA2,CA4,ENO1
GO: Molecular Function	GO:0016829	lyase activity		0.002413	0.02234	13	195	ACO1,PARK7,FASN,ALAD,FH,ALDOA,DDT,GLO1,GOT1,CA2,CA4,CD38,ENO1
GO: Molecular Function	GO:0052859	glucan endo-1,4-beta-glucosidase activity		0.002556	0.02276	4	22	MAN2B1,CTBS,GLB1L,ACE
GO: Molecular Function	GO:0044653	dextrin alpha-glucosidase activity		0.002556	0.02276	4	22	MAN2B1,CTBS,GLB1L,ACE
GO: Molecular Function	GO:0052769	beta-6-sulfate-N-acetylglucosaminidase activity		0.002556	0.02276	4	22	MAN2B1,CTBS,GLB1L,ACE
GO: Molecular Function	GO:0044654	starch alpha-glucosidase activity		0.002556	0.02276	4	22	MAN2B1,CTBS,GLB1L,ACE
GO: Molecular Function	GO:0030742	GTP-dependent protein binding		0.002556	0.02276	4	22	RAB3D,RAB3A,RAB3B,CDC42
GO: Molecular Function	GO:0052736	beta-glucanase activity		0.002556	0.02276	4	22	MAN2B1,CTBS,GLB1L,ACE
GO: Molecular Function	GO:0019103	pyrimidine nucleotide binding		0.002702	0.02361	3	11	UGP2,HSP90AA1,HSP90AB1
GO: Molecular Function	GO:0008430	selenium binding		0.002702	0.02361	3	11	SELENOP,GPX3,PRDX2
GO: Molecular Function	GO:0016723	oxidoreductase activity, oxidizing metal ions, NAD or NADP as acceptor		0.002702	0.02361	3	11	CYB561,STEAP2,STEAP4
GO: Molecular Function	GO:0015927	trehalase activity		0.00303	0.0263	4	23	MAN2B1,CTBS,GLB1L,ACE
GO: Molecular Function	GO:0072341	modified amino acid binding		0.00368	0.03175	7	74	FASN,HSPA8,GPX3,GSS,GSTM3,GSTP1,THBS1
GO: Molecular Function	GO:0005543	phospholipid binding		0.003951	0.03343	20	385	CFL1,PFN1,PLA2G2A,HSPA8,ANXA1,ANXA2,ANXA3,ANXA4,ANXA5,ANXA7,ANXA11,APOA1,APOH,ZFYVE28,IQGAP1,SYT7,THBS1,PEBP1,SYTL1,SERPINA5
GO: Molecular Function	GO:0016757	transferase activity, transferring glycosyl groups		0.004048	0.03343	17	307	HEXA,HEXB,MAN2B1,B4GALT5,HPRT1,ST6GAL1,APRT,CTBS,FUT5,GLB1L,CCDC126,ACE,B4GALT1,PYGB,PNP,PLOD3,NAMPT
GO: Molecular Function	GO:0032551	pyrimidine ribonucleoside binding		0.004164	0.03343	2	4	HSP90AA1,HSP90AB1
GO: Molecular Function	GO:0070815	peptidyl-lysine 5-dioxygenase activity		0.004164	0.03343	2	4	PLOD1,PLOD3
GO: Molecular Function	GO:0034191	apolipoprotein A-I receptor binding		0.004164	0.03343	2	4	APOA1,CDC42
GO: Molecular Function	GO:0032564	dATP binding		0.004164	0.03343	2	4	HSP90AA1,HSP90AB1
GO: Molecular Function	GO:0004897	ciliary neurotrophic factor receptor activity		0.004164	0.03343	2	4	IL6ST,LIFR
GO: Molecular Function	GO:0070052	collagen V binding		0.004164	0.03343	2	4	GPC1,THBS1
GO: Molecular Function	GO:0030984	kininogen binding		0.004164	0.03343	2	4	CTSB,CTSH
GO: Molecular Function	GO:0045340	mercury ion binding		0.004164	0.03343	2	4	PARK7,FN1
GO: Molecular Function	GO:0002134	UTP binding		0.004164	0.03343	2	4	HSP90AA1,HSP90AB1
GO: Molecular Function	GO:0004522	ribonuclease A activity		0.004164	0.03343	2	4	RNASE1,RNASE4
GO: Molecular Function	GO:0008239	dipeptidyl-peptidase activity		0.0045	0.03593	3	13	DPP7,PRCP,DPP4
GO: Molecular Function	GO:0017134	fibroblast growth factor binding		0.005518	0.0438	4	27	GLG1,GPC1,TGFBR3,THBS1
GO: Molecular Function	GO:0060229	lipase activator activity		0.005615	0.04406	3	14	PLAA,APOH,GM2A
GO: Molecular Function	GO:0001846	opsonin binding		0.005615	0.04406	3	14	APCS,C4A,CALR
GO: Molecular Function	GO:0005520	insulin-like growth factor binding		0.006303	0.04856	4	28	IGF2R,IGFBP4,IGFBP5,NOV
GO: Molecular Function	GO:0008422	beta-glucosidase activity		0.006303	0.04856	4	28	MAN2B1,CTBS,GLB1L,ACE
GO: Molecular Function	GO:0016160	amylase activity		0.006303	0.04856	4	28	MAN2B1,CTBS,GLB1L,ACE
GO: Molecular Function	GO:0004540	ribonuclease activity		0.006554	0.04856	8	103	RIDA,ANG,DIS3,RNASET2,AZGP1,RNASE13,RNASE1,RNASE4
GO: Molecular Function	GO:0008047	enzyme activator activity		0.006562	0.04856	24	515	A2M,RPLP1,PARK7,PLAA,AGT,ARHGAP29,ALDH1A1,VCP,FN1,APOA1,APOH,APP,CTSH,PSAP,ACRBP,PSME1,GDI2,IQGAP1,GM2A,RAB3A,CALM1,ARHGEF12,TIMP2,LTF
GO: Molecular Function	GO:0016721	oxidoreductase activity, acting on superoxide radicals as acceptor		0.006817	0.04856	2	5	SOD1,SOD3
GO: Molecular Function	GO:0030911	TPR domain binding		0.006817	0.04856	2	5	HSP90AA1,HSP90AB1
GO: Molecular Function	GO:0004784	superoxide dismutase activity		0.006817	0.04856	2	5	SOD1,SOD3
GO: Molecular Function	GO:0070061	fructose binding		0.006817	0.04856	2	5	ALDOA,SLC2A5
GO: Molecular Function	GO:0002054	nucleobase binding		0.006817	0.04856	2	5	APRT,PNP
GO: Molecular Function	GO:0052851	ferric-chelate reductase (NADPH) activity		0.006817	0.04856	2	5	STEAP2,STEAP4
GO: Molecular Function	GO:0008823	cupric reductase activity		0.006817	0.04856	2	5	STEAP2,STEAP4
GO: Molecular Function	GO:0050815	phosphoserine residue binding		0.006817	0.04856	2	5	YWHAB,YWHAE
GO: Molecular Function	GO:0001884	pyrimidine nucleoside binding		0.006817	0.04856	2	5	HSP90AA1,HSP90AB1
GO: Molecular Function	GO:0004565	beta-galactosidase activity		0.006817	0.04856	2	5	GLB1L,GLB1
GO: Molecular Function	GO:0005127	ciliary neurotrophic factor receptor binding		0.006817	0.04856	2	5	IL6ST,LIFR
GO: Molecular Function	GO:0051022	Rho GDP-dissociation inhibitor binding		0.006817	0.04856	2	5	HSP90AA1,CDC42
GO: Molecular Function	GO:0032558	adenyl deoxyribonucleotide binding		0.006817	0.04856	2	5	HSP90AA1,HSP90AB1
GO: Molecular Function	GO:0042043	neurexin family protein binding		0.00688	0.04876	3	15	SDCBP,CPE,SYTL1
GO: Molecular Function	GO:0044877	protein-containing complex binding		0.007213	0.05086	60	1626	AOC1,ACTB,ACTN1,ADAM10,PIP,PKM,MLPH,HSPA5,HSPA8,VCL,VCP,HSP90AA1,HSP90AB1,EZR,VTN,FN1,ANXA7,ANXA11,APOA1,CPD,PPIB,YWHAB,YWHAE,YWHAZ,DHX30,CTSB,CTSH,CTSL,GAPDH,MYO6,RAB11A,IQGAP1,PTPRF,KIF5B,GNB1,NME2,GNB2,NOV,PTCD3,GPC1,DPP4,RAP1B,ITCH,CALR,CAPZA1,LAMA5,LAMB2,CORO1B,LCP1,TGFBR3,THBS1,EEF2,CD9,TIMP2,LMO2,P4HB,TSPAN8,EIF5A,CD81,VPS28
GO: Molecular Function	GO:0051020	GTPase binding		0.007488	0.05253	17	327	PFN1,MLPH,VCL,HSP90AA1,ANXA2,RAB3D,SOD1,GDI2,IQGAP1,RAB7A,GNB1,GNB2,RAB3A,DOCK9,LCP1,SYTL1,ENO1
GO: Molecular Function	GO:0030291	protein serine/threonine kinase inhibitor activity		0.008089	0.05646	4	30	HSPB1,YWHAG,PRKAR2A,SFN
GO: Molecular Function	GO:0003779	actin binding		0.008189	0.05687	20	412	CFL1,ACTN1,PFN1,PIP,ALDOA,MLPH,PLS3,VCL,CAP1,EZR,ANG,YWHAH,MYO6,GC,ACE,CAPZA1,CORO1B,LCP1,GSN,EEF2
GO: Molecular Function	GO:0008234	cysteine-type peptidase activity		0.008278	0.05721	12	201	UCHL3,CTSB,CTSD,CTSH,CTSL,CTSZ,LGMN,CTSF,CAPN5,PDCD6,PDIA3,USP5
GO: Molecular Function	GO:0008484	sulfuric ester hydrolase activity		0.009881	0.06612	3	17	ARSA,GALNS,GNS
GO: Molecular Function	GO:0032554	purine deoxyribonucleotide binding		0.01004	0.06612	2	6	HSP90AA1,HSP90AB1
GO: Molecular Function	GO:0034416	bisphosphoglycerate phosphatase activity		0.01004	0.06612	2	6	PGAM1,MINPP1
GO: Molecular Function	GO:0036402	proteasome-activating ATPase activity		0.01004	0.06612	2	6	PSMC3,PSMC4
GO: Molecular Function	GO:0051021	GDP-dissociation inhibitor binding		0.01004	0.06612	2	6	HSP90AA1,CDC42
GO: Molecular Function	GO:0004308	exo-alpha-sialidase activity		0.01004	0.06612	2	6	NEU1,GLB1
GO: Molecular Function	GO:0016936	galactoside binding		0.01004	0.06612	2	6	GLA,GLB1
GO: Molecular Function	GO:0016997	alpha-sialidase activity		0.01004	0.06612	2	6	NEU1,GLB1
GO: Molecular Function	GO:0055131	C3HC4-type RING finger domain binding		0.01004	0.06612	2	6	HSPA1A,HSPA8
GO: Molecular Function	GO:0004301	epoxide hydrolase activity		0.01004	0.06612	2	6	EPHX2,AKR7A2
GO: Molecular Function	GO:0001968	fibronectin binding		0.01134	0.07361	4	33	MMP2,IGFBP5,CTSL,THBS1
GO: Molecular Function	GO:0005154	epidermal growth factor receptor binding		0.01134	0.07361	4	33	EFEMP1,PIGR,AGR2,ARF4
GO: Molecular Function	GO:0008933	lytic transglycosylase activity		0.01134	0.07361	4	33	MAN2B1,CTBS,GLB1L,ACE
GO: Molecular Function	GO:0016298	lipase activity		0.01225	0.07915	9	138	PLA1A,LIPG,PLA2G2A,PRDX6,SMPD1,SMPDL3A,PDIA3,LIPA,LPL
GO: Molecular Function	GO:0034190	apolipoprotein receptor binding		0.01381	0.08801	2	7	APOA1,CDC42
GO: Molecular Function	GO:0004568	chitinase activity		0.01381	0.08801	2	7	CTBS,CHID1
GO: Molecular Function	GO:0005138	interleukin-6 receptor binding		0.01381	0.08801	2	7	IL6ST,ERAP1
GO: Molecular Function	GO:0070851	growth factor receptor binding		0.01517	0.09624	9	143	EFEMP1,PIGR,SDCBP,AGR2,APP,ARF4,IL6ST,ERAP1,ECM1
GO: Molecular Function	GO:0001540	amyloid-beta binding		0.01533	0.0968	4	36	ITM2B,APOA1,CLSTN1,CST3
GO: Molecular Function	GO:0004602	glutathione peroxidase activity		0.01561	0.09811	3	20	PRDX6,GPX3,GSTT2
GO: Molecular Function	GO:0043539	protein serine/threonine kinase activator activity		0.01786	0.1088	3	21	IQGAP1,CALM1,LTF
GO: Molecular Function	GO:0003746	translation elongation factor activity		0.01786	0.1088	3	21	EEF1G,EEF2,EIF5A
GO: Molecular Function	GO:0016018	cyclosporin A binding		0.01809	0.1088	2	8	PPIA,PPIC
GO: Molecular Function	GO:0003831	beta-N-acetylglucosaminylglycopeptide beta-1,4-galactosyltransferase activity		0.01809	0.1088	2	8	B4GALT5,B4GALT1
GO: Molecular Function	GO:0032552	deoxyribonucleotide binding		0.01809	0.1088	2	8	HSP90AA1,HSP90AB1
GO: Molecular Function	GO:0004767	sphingomyelin phosphodiesterase activity		0.01809	0.1088	2	8	SMPD1,SMPDL3A
GO: Molecular Function	GO:0008061	chitin binding		0.01809	0.1088	2	8	CTBS,CHID1
GO: Molecular Function	GO:1990459	transferrin receptor binding		0.01809	0.1088	2	8	TF,CD81
GO: Molecular Function	GO:0004465	lipoprotein lipase activity		0.01809	0.1088	2	8	LIPG,LPL
GO: Molecular Function	GO:0016803	ether hydrolase activity		0.01809	0.1088	2	8	EPHX2,AKR7A2
GO: Molecular Function	GO:0004521	endoribonuclease activity		0.01822	0.1091	5	57	RIDA,DIS3,RNASET2,RNASE1,RNASE4
GO: Molecular Function	GO:0004620	phospholipase activity		0.01874	0.1096	8	124	PLA1A,LIPG,PLA2G2A,PRDX6,SMPD1,SMPDL3A,PDIA3,LPL
GO: Molecular Function	GO:0016597	amino acid binding		0.01874	0.1096	8	124	AARS,DDAH1,HSPA8,YWHAB,YWHAE,GLRA2,GSS,THBS1
GO: Molecular Function	GO:0019900	kinase binding		0.0205	0.1096	28	691	PARK7,ACTB,ADAM10,PGAM1,HSPB1,HSP90AA1,HSP90AB1,EZR,ANXA5,YWHAG,YWHAZ,PPP1CB,PRKAR2A,DNAJC3,NAP1L1,ACE,IQGAP1,B4GALT1,PTPRF,KIF5B,SFN,CALM1,LDHA,LDHB,GSTP1,EEF2,PEBP1,CDC42
GO: Molecular Function	GO:0044325	ion channel binding		0.02131	0.1096	8	127	ACTN1,HSP90AA1,HSP90AB1,YWHAE,YWHAH,YWHAQ,CALM1,AGRN
GO: Molecular Function	GO:0008429	phosphatidylethanolamine binding		0.02285	0.1096	2	9	ANXA11,PEBP1
GO: Molecular Function	GO:0017025	TBP-class protein binding		0.02286	0.1096	3	23	CAND1,PSMC3,PSMC4
GO: Molecular Function	GO:0016864	intramolecular oxidoreductase activity, transposing S-S bonds		0.02286	0.1096	3	23	QSOX1,PDIA3,P4HB
GO: Molecular Function	GO:0003756	protein disulfide isomerase activity		0.02286	0.1096	3	23	QSOX1,PDIA3,P4HB
GO: Molecular Function	GO:0008242	omega peptidase activity		0.02286	0.1096	3	23	APEH,GGT1,GGH
GO: Molecular Function	GO:0004033	aldo-keto reductase (NADP) activity		0.02375	0.1096	4	41	AKR1A1,ADH5,AKR7A2,SPR
GO: Molecular Function	GO:0042562	hormone binding		0.02415	0.1096	6	83	TTR,ALDH1A1,ANXA5,CRYM,CTSH,CALR
GO: Molecular Function	GO:0051015	actin filament binding		0.02612	0.1096	8	132	ACTN1,VCL,EZR,MYO6,CAPZA1,CORO1B,LCP1,EEF2
GO: Molecular Function	GO:0043130	ubiquitin binding		0.02641	0.1096	7	108	TSG101,MVB12A,UCHL3,HSPB1,VCP,USP5,VPS28
GO: Molecular Function	GO:0004317	3-hydroxypalmitoyl-[acyl-carrier-protein] dehydratase activity		0.02761	0.1096	1	1	FASN
GO: Molecular Function	GO:0035731	dinitrosyl-iron complex binding		0.02761	0.1096	1	1	GSTP1
GO: Molecular Function	GO:0002055	adenine binding		0.02761	0.1096	1	1	APRT
GO: Molecular Function	GO:0050115	myosin-light-chain-phosphatase activity		0.02761	0.1096	1	1	PPP1CB
GO: Molecular Function	GO:0004561	alpha-N-acetylglucosaminidase activity		0.02761	0.1096	1	1	NAGLU
GO: Molecular Function	GO:0031715	C5L2 anaphylatoxin chemotactic receptor binding		0.02761	0.1096	1	1	C3
GO: Molecular Function	GO:0047117	enoyl-[acyl-carrier-protein] reductase (NADPH, A-specific) activity		0.02761	0.1096	1	1	FASN
GO: Molecular Function	GO:0047444	N-acylneuraminate-9-phosphate synthase activity		0.02761	0.1096	1	1	NANS
GO: Molecular Function	GO:0032428	beta-N-acetylgalactosaminidase activity		0.02761	0.1096	1	1	GM2A
GO: Molecular Function	GO:0047280	nicotinamide phosphoribosyltransferase activity		0.02761	0.1096	1	1	NAMPT
GO: Molecular Function	GO:0047451	3-hydroxyoctanoyl-[acyl-carrier-protein] dehydratase activity		0.02761	0.1096	1	1	FASN
GO: Molecular Function	GO:0018738	S-formylglutathione hydrolase activity		0.02761	0.1096	1	1	ESD
GO: Molecular Function	GO:1903136	cuprous ion binding		0.02761	0.1096	1	1	PARK7
GO: Molecular Function	GO:0035730	S-nitrosoglutathione binding		0.02761	0.1096	1	1	GSTP1
GO: Molecular Function	GO:0003999	adenine phosphoribosyltransferase activity		0.02761	0.1096	1	1	APRT
GO: Molecular Function	GO:0008126	acetylesterase activity		0.02761	0.1096	1	1	SIAE
GO: Molecular Function	GO:0004316	3-oxoacyl-[acyl-carrier-protein] reductase (NADPH) activity		0.02761	0.1096	1	1	FASN
GO: Molecular Function	GO:0008114	phosphogluconate 2-dehydrogenase activity		0.02761	0.1096	1	1	PGD
GO: Molecular Function	GO:0031177	phosphopantetheine binding		0.02761	0.1096	1	1	FASN
GO: Molecular Function	GO:1904493	tetrahydrofolyl-poly(glutamate) polymer binding		0.02761	0.1096	1	1	FOLH1
GO: Molecular Function	GO:0033676	double-stranded DNA-dependent ATPase activity		0.02761	0.1096	1	1	ANXA1
GO: Molecular Function	GO:0052597	diamine oxidase activity		0.02761	0.1096	1	1	AOC1
GO: Molecular Function	GO:0004363	glutathione synthase activity		0.02761	0.1096	1	1	GSS
GO: Molecular Function	GO:0047677	arachidonate 8(R)-lipoxygenase activity		0.02761	0.1096	1	1	ALOX15B
GO: Molecular Function	GO:1904013	xenon atom binding		0.02761	0.1096	1	1	RIDA
GO: Molecular Function	GO:0003979	UDP-glucose 6-dehydrogenase activity		0.02761	0.1096	1	1	UGDH
GO: Molecular Function	GO:0042988	X11-like protein binding		0.02761	0.1096	1	1	CLSTN1
GO: Molecular Function	GO:0070123	transforming growth factor beta receptor activity, type III		0.02761	0.1096	1	1	TGFBR3
GO: Molecular Function	GO:0047939	L-glucuronate reductase activity		0.02761	0.1096	1	1	AKR1A1
GO: Molecular Function	GO:0061750	acid sphingomyelin phosphodiesterase activity		0.02761	0.1096	1	1	SMPD1
GO: Molecular Function	GO:1904492	Ac-Asp-Glu binding		0.02761	0.1096	1	1	FOLH1
GO: Molecular Function	GO:0003983	UTP:glucose-1-phosphate uridylyltransferase activity		0.02761	0.1096	1	1	UGP2
GO: Molecular Function	GO:0004347	glucose-6-phosphate isomerase activity		0.02761	0.1096	1	1	GPI
GO: Molecular Function	GO:0033885	10-hydroxy-9-(phosphonooxy)octadecanoate phosphatase activity		0.02761	0.1096	1	1	EPHX2
GO: Molecular Function	GO:0003939	L-iditol 2-dehydrogenase activity		0.02761	0.1096	1	1	SORD
GO: Molecular Function	GO:0031320	hexitol dehydrogenase activity		0.02761	0.1096	1	1	SORD
GO: Molecular Function	GO:0004034	aldose 1-epimerase activity		0.02761	0.1096	1	1	GALM
GO: Molecular Function	GO:1902118	calcidiol binding		0.02761	0.1096	1	1	GC
GO: Molecular Function	GO:0036470	tyrosine 3-monooxygenase activator activity		0.02761	0.1096	1	1	PARK7
GO: Molecular Function	GO:0004655	porphobilinogen synthase activity		0.02761	0.1096	1	1	ALAD
GO: Molecular Function	GO:0051903	S-(hydroxymethyl)glutathione dehydrogenase activity		0.02761	0.1096	1	1	ADH5
GO: Molecular Function	GO:1904593	prostaglandin binding		0.02761	0.1096	1	1	HSPA8
GO: Molecular Function	GO:0047860	diiodophenylpyruvate reductase activity		0.02761	0.1096	1	1	MDH1
GO: Molecular Function	GO:0002113	interleukin-33 binding		0.02761	0.1096	1	1	IL1RL1
GO: Molecular Function	GO:0030290	sphingolipid activator protein activity		0.02761	0.1096	1	1	GM2A
GO: Molecular Function	GO:0019171	3-hydroxyacyl-[acyl-carrier-protein] dehydratase activity		0.02761	0.1096	1	1	FASN
GO: Molecular Function	GO:0016768	spermine synthase activity		0.02761	0.1096	1	1	SMS
GO: Molecular Function	GO:0050146	nucleoside phosphotransferase activity		0.02761	0.1096	1	1	NT5C2
GO: Molecular Function	GO:0001792	polymeric immunoglobulin receptor activity		0.02761	0.1096	1	1	PIGR
GO: Molecular Function	GO:0031703	type 2 angiotensin receptor binding		0.02761	0.1096	1	1	AGT
GO: Molecular Function	GO:0052826	inositol hexakisphosphate 2-phosphatase activity		0.02761	0.1096	1	1	MINPP1
GO: Molecular Function	GO:0051748	UTP-monosaccharide-1-phosphate uridylyltransferase activity		0.02761	0.1096	1	1	UGP2
GO: Molecular Function	GO:0060001	minus-end directed microfilament motor activity		0.02761	0.1096	1	1	MYO6
GO: Molecular Function	GO:0050221	prostaglandin-E2 9-reductase activity		0.02761	0.1096	1	1	CBR1
GO: Molecular Function	GO:0004334	fumarylacetoacetase activity		0.02761	0.1096	1	1	FAH
GO: Molecular Function	GO:0033897	ribonuclease T2 activity		0.02761	0.1096	1	1	RNASET2
GO: Molecular Function	GO:0004446	inositol-hexakisphosphate phosphatase activity		0.02761	0.1096	1	1	MINPP1
GO: Molecular Function	GO:0004333	fumarate hydratase activity		0.02761	0.1096	1	1	FH
GO: Molecular Function	GO:0060698	endoribonuclease inhibitor activity		0.02761	0.1096	1	1	TMBIM6
GO: Molecular Function	GO:0052600	propane-1,3-diamine oxidase activity		0.02761	0.1096	1	1	AOC1
GO: Molecular Function	GO:0031714	C5a anaphylatoxin chemotactic receptor binding		0.02761	0.1096	1	1	C3
GO: Molecular Function	GO:0003878	ATP citrate synthase activity		0.02761	0.1096	1	1	ACLY
GO: Molecular Function	GO:0034722	gamma-glutamyl-peptidase activity		0.02761	0.1096	1	1	GGH
GO: Molecular Function	GO:0004098	cerebroside-sulfatase activity		0.02761	0.1096	1	1	ARSA
GO: Molecular Function	GO:0035800	deubiquitinase activator activity		0.02761	0.1096	1	1	VCP
GO: Molecular Function	GO:0004411	homogentisate 1,2-dioxygenase activity		0.02761	0.1096	1	1	HGD
GO: Molecular Function	GO:0097655	serpin family protein binding		0.02761	0.1096	1	1	CTSL
GO: Molecular Function	GO:0036143	kringle domain binding		0.02761	0.1096	1	1	CLEC3B
GO: Molecular Function	GO:0072541	peroxynitrite reductase activity		0.02761	0.1096	1	1	PRDX5
GO: Molecular Function	GO:0004567	beta-mannosidase activity		0.02761	0.1096	1	1	MANBA
GO: Molecular Function	GO:0033981	D-dopachrome decarboxylase activity		0.02761	0.1096	1	1	DDT
GO: Molecular Function	GO:1990833	clathrin-uncoating ATPase activity		0.02761	0.1096	1	1	HSPA8
GO: Molecular Function	GO:0035605	peptidyl-cysteine S-nitrosylase activity		0.02761	0.1096	1	1	GAPDH
GO: Molecular Function	GO:1990422	glyoxalase (glycolic acid-forming) activity		0.02761	0.1096	1	1	PARK7
GO: Molecular Function	GO:0102008	cytosolic dipeptidase activity		0.02761	0.1096	1	1	CNDP2
GO: Molecular Function	GO:0052692	raffinose alpha-galactosidase activity		0.02761	0.1096	1	1	GLA
GO: Molecular Function	GO:0034338	short-chain carboxylesterase activity		0.02761	0.1096	1	1	SIAE
GO: Molecular Function	GO:0004617	phosphoglycerate dehydrogenase activity		0.02761	0.1096	1	1	PHGDH
GO: Molecular Function	GO:0052598	histamine oxidase activity		0.02761	0.1096	1	1	AOC1
GO: Molecular Function	GO:0018467	formaldehyde dehydrogenase activity		0.02761	0.1096	1	1	ADH5
GO: Molecular Function	GO:0034417	bisphosphoglycerate 3-phosphatase activity		0.02761	0.1096	1	1	MINPP1
GO: Molecular Function	GO:0052657	guanine phosphoribosyltransferase activity		0.02761	0.1096	1	1	HPRT1
GO: Molecular Function	GO:0044388	small protein activating enzyme binding		0.02761	0.1096	1	1	PARK7
GO: Molecular Function	GO:0004319	enoyl-[acyl-carrier-protein] reductase (NADPH, B-specific) activity		0.02761	0.1096	1	1	FASN
GO: Molecular Function	GO:0036478	L-dopa decarboxylase activator activity		0.02761	0.1096	1	1	PARK7
GO: Molecular Function	GO:0042602	riboflavin reductase (NADPH) activity		0.02761	0.1096	1	1	BLVRB
GO: Molecular Function	GO:0004757	sepiapterin reductase activity		0.02761	0.1096	1	1	SPR
GO: Molecular Function	GO:0052599	methylputrescine oxidase activity		0.02761	0.1096	1	1	AOC1
GO: Molecular Function	GO:0047801	L-cysteine:2-oxoglutarate aminotransferase activity		0.02761	0.1096	1	1	GOT1
GO: Molecular Function	GO:0032791	lead ion binding		0.02761	0.1096	1	1	ALAD
GO: Molecular Function	GO:0004807	triose-phosphate isomerase activity		0.02761	0.1096	1	1	TPI1
GO: Molecular Function	GO:1904399	heparan sulfate binding		0.02761	0.1096	1	1	PTN
GO: Molecular Function	GO:0033823	procollagen glucosyltransferase activity		0.02761	0.1096	1	1	PLOD3
GO: Molecular Function	GO:0050462	N-acetylneuraminate synthase activity		0.02761	0.1096	1	1	NANS
GO: Molecular Function	GO:0004462	lactoylglutathione lyase activity		0.02761	0.1096	1	1	GLO1
GO: Molecular Function	GO:0042131	thiamine phosphate phosphatase activity		0.02761	0.1096	1	1	ACPP
GO: Molecular Function	GO:1904012	platinum binding		0.02761	0.1096	1	1	RIDA
GO: Molecular Function	GO:0047021	15-hydroxyprostaglandin dehydrogenase (NADP+) activity		0.02761	0.1096	1	1	CBR1
GO: Molecular Function	GO:0001681	sialate O-acetylesterase activity		0.02761	0.1096	1	1	SIAE
GO: Molecular Function	GO:0004313	[acyl-carrier-protein] S-acetyltransferase activity		0.02761	0.1096	1	1	FASN
GO: Molecular Function	GO:0046526	D-xylulose reductase activity		0.02761	0.1096	1	1	SORD
GO: Molecular Function	GO:0047127	thiomorpholine-carboxylate dehydrogenase activity		0.02761	0.1096	1	1	CRYM
GO: Molecular Function	GO:0043890	N-acetylgalactosamine-6-sulfatase activity		0.02761	0.1096	1	1	GALNS
GO: Molecular Function	GO:0030108	HLA-A specific activating MHC class I receptor activity		0.02761	0.1096	1	1	CTSH
GO: Molecular Function	GO:0032397	activating MHC class I receptor activity		0.02761	0.1096	1	1	CTSH
GO: Molecular Function	GO:0046914	transition metal ion binding		0.02797	0.1104	51	1448	RIDA,AARS,DDAH1,AOC1,MAN2A1,MAN2B1,ACR,PARK7,ADAM10,ADH5,ALAD,ALB,MME,MMP2,PLOD1,ALOX15B,ANG,FN1,ANPEP,ADAMTS1,CP,APLP2,CPD,CPE,CPZ,XPNPEP1,CPM,APP,CUTA,SMPD1,SOD1,SOD3,SORD,IMPA1,ERAP1,ACE,B4GALT1,ALKBH8,SMPDL3A,GLO1,CA2,CA4,GPC1,PLOD3,CALR,LCN2,TF,USP5,LMO2,LNPEP,LTF
GO: Molecular Function	GO:0050308	sugar-phosphatase activity		0.02807	0.1104	2	10	FBP1,FBP2
GO: Molecular Function	GO:0031702	type 1 angiotensin receptor binding		0.02807	0.1104	2	10	AGT,GNB1
GO: Molecular Function	GO:0017048	Rho GTPase binding		0.02959	0.1161	6	87	PFN1,VCL,SOD1,IQGAP1,RAB7A,DOCK9
GO: Molecular Function	GO:0019207	kinase regulator activity		0.03199	0.1252	11	216	RPLP1,HSPB1,HSP90AB1,YWHAG,PRKAR2A,DNAJC3,IQGAP1,SFN,CALM1,GSTP1,LTF
GO: Molecular Function	GO:0016861	intramolecular oxidoreductase activity, interconverting aldoses and ketoses		0.0337	0.1286	2	11	GPI,TPI1
GO: Molecular Function	GO:0019203	carbohydrate phosphatase activity		0.0337	0.1286	2	11	FBP1,FBP2
GO: Molecular Function	GO:0003993	acid phosphatase activity		0.0337	0.1286	2	11	ACPP,MINPP1
GO: Molecular Function	GO:0045294	alpha-catenin binding		0.0337	0.1286	2	11	VCL,CDH1
GO: Molecular Function	GO:0008970	phosphatidylcholine 1-acylhydrolase activity		0.0337	0.1286	2	11	PLA1A,LIPG
GO: Molecular Function	GO:0003796	lysozyme activity		0.0337	0.1286	2	11	LYZ,SPACA3
GO: Molecular Function	GO:0016868	intramolecular transferase activity, phosphotransferases		0.0337	0.1286	2	11	PGAM1,PGM1
GO: Molecular Function	GO:0042577	lipid phosphatase activity		0.0337	0.1286	2	11	EPHX2,PLPP1
GO: Molecular Function	GO:0016801	hydrolase activity, acting on ether bonds		0.0337	0.1286	2	11	EPHX2,AKR7A2
GO: Molecular Function	GO:0051213	dioxygenase activity		0.03415	0.13	6	90	HGD,PLOD1,ALOX15B,ALKBH8,PLOD3,P4HB
GO: Molecular Function	GO:0016866	intramolecular transferase activity		0.0349	0.1325	3	27	PGAM1,PGM1,GPI
GO: Molecular Function	GO:0008083	growth factor activity		0.03546	0.1342	9	166	EFEMP1,AGT,GDF15,KLK3,PTN,NOV,GPI,LEFTY2,TIMP1
GO: Molecular Function	GO:0001664	G-protein coupled receptor binding		0.03617	0.1365	13	276	AGT,HSPA1A,HSPA8,SDCBP,WNT7A,PSAP,ACE,C3,GNB1,ITCH,PDCD6IP,CALM1,ARHGEF12
GO: Molecular Function	GO:0005044	scavenger receptor activity		0.03694	0.139	4	47	VTN,CFI,LGALS3BP,TMPRSS2
GO: Molecular Function	GO:0019887	protein kinase regulator activity		0.03815	0.1432	10	195	RPLP1,HSPB1,HSP90AB1,YWHAG,PRKAR2A,DNAJC3,IQGAP1,SFN,CALM1,LTF
GO: Molecular Function	GO:0032553	ribonucleotide binding		0.03825	0.1432	63	1880	AARS,HSP90B1,ACLY,STK32B,ACTB,ACTG2,PGK1,CKB,TUBB4A,UBA1,FBP1,UGP2,PKM,ITM2B,HSPA1A,HSPA2,HSPA5,HSPA6,HSPA8,VCP,HSP90AA1,HSP90AB1,WARS,HYOU1,HSPA4L,RAB3D,CCT2,APRT,RAB6B,ARF3,ARF4,DHX30,RHOC,RUVBL1,CCT5,PRKAR2A,RAB21,ATP6V1A,CMPK1,MYO6,GARS,RAB11A,PSMC3,PSMC4,CREG1,HSPA13,RAB10,RAB7A,KIF5B,NME2,RAB1A,RAB2A,RAB3A,RAB3B,RAB27A,RAB27B,RAP1B,TUBA1C,GSS,CCT6A,EEF2,PEBP1,CDC42
GO: Molecular Function	GO:0031701	angiotensin receptor binding		0.03974	0.1472	2	12	AGT,GNB1
GO: Molecular Function	GO:0016004	phospholipase activator activity		0.03974	0.1472	2	12	PLAA,GM2A
GO: Molecular Function	GO:1990381	ubiquitin-specific protease binding		0.03974	0.1472	2	12	PARK7,VCP
GO: Molecular Function	GO:0031994	insulin-like growth factor I binding		0.03974	0.1472	2	12	IGFBP4,IGFBP5
GO: Molecular Function	GO:0016791	phosphatase activity		0.04179	0.1541	13	282	EPHX2,ACPP,PGAM1,FBP1,MINPP1,PPP1CB,PPP2R1A,PLPP1,NT5C2,IMPA1,FBP2,PTPRF,PTPRS
GO: Molecular Function	GO:0004032	alditol:NADP+ 1-oxidoreductase activity		0.04193	0.1541	3	29	AKR1A1,ADH5,AKR7A2
GO: Molecular Function	GO:0001618	virus receptor activity		0.04194	0.1541	5	71	HSPA1A,ANPEP,F11R,DPP4,LAMP1
GO: Molecular Function	GO:0042578	phosphoric ester hydrolase activity		0.0421	0.1543	18	429	EPHX2,RIDA,ACPP,PGAM1,FBP1,MINPP1,PPP1CB,PPP2R1A,PLPP1,NT5C2,SMPD1,IMPA1,FBP2,PTPRF,PTPRS,SMPDL3A,GNB1,PDIA3
GO: Molecular Function	GO:0051019	mitogen-activated protein kinase binding		0.04569	0.1611	3	30	ACE,IQGAP1,PEBP1
GO: Molecular Function	GO:0042301	phosphate ion binding		0.04614	0.1611	2	13	PTPRF,PNP
GO: Molecular Function	GO:0070569	uridylyltransferase activity		0.04614	0.1611	2	13	UGP2,UAP1
GO: Molecular Function	GO:0016775	phosphotransferase activity, nitrogenous group as acceptor		0.04614	0.1611	2	13	CKB,NME2
GO: Molecular Function	GO:0008432	JUN kinase binding		0.04614	0.1611	2	13	KIF5B,GSTP1
GO: Molecular Function	GO:0019901	protein kinase binding		0.04733	0.1611	24	620	ACTB,ADAM10,PGAM1,HSPB1,HSP90AA1,HSP90AB1,EZR,ANXA5,YWHAG,YWHAZ,PPP1CB,PRKAR2A,DNAJC3,ACE,IQGAP1,B4GALT1,PTPRF,KIF5B,SFN,CALM1,GSTP1,EEF2,PEBP1,CDC42
GO: Molecular Function	GO:0030545	receptor regulator activity		0.04766	0.1611	4	51	AGT,ANXA2,WNT7A,AGRN
GO: Molecular Function	GO:0001882	nucleoside binding		0.04813	0.1611	61	1838	AARS,HSP90B1,ACLY,STK32B,ACTB,ACTG2,PGK1,CKB,TUBB4A,UBA1,FBP1,PKM,ITM2B,HSPA1A,HSPA2,HSPA5,HSPA6,HSPA8,VCP,HSP90AA1,HSP90AB1,WARS,HYOU1,HSPA4L,RAB3D,CCT2,APRT,RAB6B,ARF3,ARF4,DHX30,RHOC,RUVBL1,CCT5,RAB21,ATP6V1A,CMPK1,MYO6,GARS,RAB11A,PSMC3,PSMC4,HSPA13,RAB10,RAB7A,KIF5B,NME2,RAB1A,RAB2A,RAB3A,RAB3B,RAB27A,RAB27B,PNP,RAP1B,TUBA1C,GSS,CCT6A,EEF2,PEBP1,CDC42
GO: Molecular Function	GO:0017076	purine nucleotide binding		0.05115	0.1611	62	1879	AARS,HSP90B1,ACLY,STK32B,ACTB,ACTG2,PFN1,PGK1,CKB,TUBB4A,UBA1,FBP1,PKM,ITM2B,HSPA1A,HSPA2,HSPA5,HSPA6,HSPA8,VCP,HSP90AA1,HSP90AB1,WARS,HYOU1,HSPA4L,RAB3D,CCT2,APRT,RAB6B,ARF3,ARF4,DHX30,RHOC,RUVBL1,CCT5,PRKAR2A,RAB21,ATP6V1A,CMPK1,MYO6,GARS,RAB11A,PSMC3,PSMC4,HSPA13,RAB10,RAB7A,KIF5B,NME2,RAB1A,RAB2A,RAB3A,RAB3B,RAB27A,RAB27B,RAP1B,TUBA1C,GSS,CCT6A,EEF2,PEBP1,CDC42
GO: Molecular Function	GO:0004089	carbonate dehydratase activity		0.0529	0.1611	2	14	CA2,CA4
GO: Molecular Function	GO:0031996	thioesterase binding		0.0529	0.1611	2	14	CALM1,CDC42
GO: Molecular Function	GO:0008253	5'-nucleotidase activity		0.0529	0.1611	2	14	ACPP,NT5C2
GO: Molecular Function	GO:0015643	toxic substance binding		0.0529	0.1611	2	14	EPHX2,ALB
GO: Molecular Function	GO:0016208	AMP binding		0.0529	0.1611	2	14	FBP1,APRT
GO: Molecular Function	GO:0051717	inositol-1,3,4,5-tetrakisphosphate 3-phosphatase activity		0.053	0.1611	1	2	MINPP1
GO: Molecular Function	GO:0019828	aspartic-type endopeptidase inhibitor activity		0.053	0.1611	1	2	WFDC2
GO: Molecular Function	GO:0017129	triglyceride binding		0.053	0.1611	1	2	LPL
GO: Molecular Function	GO:1902271	D3 vitamins binding		0.053	0.1611	1	2	GC
GO: Molecular Function	GO:0043120	tumor necrosis factor binding		0.053	0.1611	1	2	A2M
GO: Molecular Function	GO:0016295	myristoyl-[acyl-carrier-protein] hydrolase activity		0.053	0.1611	1	2	FASN
GO: Molecular Function	GO:0019970	interleukin-11 binding		0.053	0.1611	1	2	IL6ST
GO: Molecular Function	GO:0047708	biotinidase activity		0.053	0.1611	1	2	BTD
GO: Molecular Function	GO:0004743	pyruvate kinase activity		0.053	0.1611	1	2	PKM
GO: Molecular Function	GO:0004320	oleoyl-[acyl-carrier-protein] hydrolase activity		0.053	0.1611	1	2	FASN
GO: Molecular Function	GO:0045509	interleukin-27 receptor activity		0.053	0.1611	1	2	IL6ST
GO: Molecular Function	GO:0004040	amidase activity		0.053	0.1611	1	2	ACR
GO: Molecular Function	GO:0047134	protein-disulfide reductase activity		0.053	0.1611	1	2	TXNDC17
GO: Molecular Function	GO:0003994	aconitate hydratase activity		0.053	0.1611	1	2	ACO1
GO: Molecular Function	GO:0004574	oligo-1,6-glucosidase activity		0.053	0.1611	1	2	GAA
GO: Molecular Function	GO:0050135	NAD(P)+ nucleosidase activity		0.053	0.1611	1	2	CD38
GO: Molecular Function	GO:0004382	guanosine-diphosphatase activity		0.053	0.1611	1	2	CANT1
GO: Molecular Function	GO:0016231	beta-N-acetylglucosaminidase activity		0.053	0.1611	1	2	HEXB
GO: Molecular Function	GO:0052642	lysophosphatidic acid phosphatase activity		0.053	0.1611	1	2	ACPP
GO: Molecular Function	GO:0016296	palmitoyl-[acyl-carrier-protein] hydrolase activity		0.053	0.1611	1	2	FASN
GO: Molecular Function	GO:0005353	fructose transmembrane transporter activity		0.053	0.1611	1	2	SLC2A5
GO: Molecular Function	GO:0004572	mannosyl-oligosaccharide 1,3-1,6-alpha-mannosidase activity		0.053	0.1611	1	2	MAN2A1
GO: Molecular Function	GO:0004609	phosphatidylserine decarboxylase activity		0.053	0.1611	1	2	GOT1
GO: Molecular Function	GO:0004365	glyceraldehyde-3-phosphate dehydrogenase (NAD+) (phosphorylating) activity		0.053	0.1611	1	2	GAPDH
GO: Molecular Function	GO:0003977	UDP-N-acetylglucosamine diphosphorylase activity		0.053	0.1611	1	2	UAP1
GO: Molecular Function	GO:0030156	benzodiazepine receptor binding		0.053	0.1611	1	2	DBI
GO: Molecular Function	GO:0008781	N-acylneuraminate cytidylyltransferase activity		0.053	0.1611	1	2	NANS
GO: Molecular Function	GO:0004731	purine-nucleoside phosphorylase activity		0.053	0.1611	1	2	PNP
GO: Molecular Function	GO:0016297	acyl-[acyl-carrier-protein] hydrolase activity		0.053	0.1611	1	2	FASN
GO: Molecular Function	GO:0004820	glycine-tRNA ligase activity		0.053	0.1611	1	2	GARS
GO: Molecular Function	GO:0034701	tripeptidase activity		0.053	0.1611	1	2	CNDP2
GO: Molecular Function	GO:0004074	biliverdin reductase activity		0.053	0.1611	1	2	BLVRB
GO: Molecular Function	GO:0016165	linoleate 13S-lipoxygenase activity		0.053	0.1611	1	2	ALOX15B
GO: Molecular Function	GO:0004315	3-oxoacyl-[acyl-carrier-protein] synthase activity		0.053	0.1611	1	2	FASN
GO: Molecular Function	GO:0016005	phospholipase A2 activator activity		0.053	0.1611	1	2	PLAA
GO: Molecular Function	GO:0022852	glycine-gated chloride ion channel activity		0.053	0.1611	1	2	GLRA2
GO: Molecular Function	GO:0019118	phenanthrene-epoxide hydrolase activity		0.053	0.1611	1	2	AKR7A2
GO: Molecular Function	GO:0004915	interleukin-6 receptor activity		0.053	0.1611	1	2	IL6ST
GO: Molecular Function	GO:0033862	UMP kinase activity		0.053	0.1611	1	2	CMPK1
GO: Molecular Function	GO:0004422	hypoxanthine phosphoribosyltransferase activity		0.053	0.1611	1	2	HPRT1
GO: Molecular Function	GO:0004830	tryptophan-tRNA ligase activity		0.053	0.1611	1	2	WARS
GO: Molecular Function	GO:0005151	interleukin-1, Type II receptor binding		0.053	0.1611	1	2	ERAP1
GO: Molecular Function	GO:0043891	glyceraldehyde-3-phosphate dehydrogenase (NAD(P)+) (phosphorylating) activity		0.053	0.1611	1	2	GAPDH
GO: Molecular Function	GO:0004314	[acyl-carrier-protein] S-malonyltransferase activity		0.053	0.1611	1	2	FASN
GO: Molecular Function	GO:0004450	isocitrate dehydrogenase (NADP+) activity		0.053	0.1611	1	2	IDH1
GO: Molecular Function	GO:0019172	glyoxalase III activity		0.053	0.1611	1	2	PARK7
GO: Molecular Function	GO:1903135	cupric ion binding		0.053	0.1611	1	2	PARK7
GO: Molecular Function	GO:0031403	lithium ion binding		0.053	0.1611	1	2	IMPA1
GO: Molecular Function	GO:0003835	beta-galactoside alpha-2,6-sialyltransferase activity		0.053	0.1611	1	2	ST6GAL1
GO: Molecular Function	GO:0004557	alpha-galactosidase activity		0.053	0.1611	1	2	GLA
GO: Molecular Function	GO:0002114	interleukin-33 receptor activity		0.053	0.1611	1	2	IL1RL1
GO: Molecular Function	GO:0005093	Rab GDP-dissociation inhibitor activity		0.053	0.1611	1	2	GDI2
GO: Molecular Function	GO:0018479	benzaldehyde dehydrogenase (NAD+) activity		0.053	0.1611	1	2	ALDH1A1
GO: Molecular Function	GO:0017057	6-phosphogluconolactonase activity		0.053	0.1611	1	2	PGLS
GO: Molecular Function	GO:0004531	deoxyribonuclease II activity		0.053	0.1611	1	2	DNASE2
GO: Molecular Function	GO:0030060	L-malate dehydrogenase activity		0.053	0.1611	1	2	MDH1
GO: Molecular Function	GO:0016403	dimethylargininase activity		0.053	0.1611	1	2	DDAH1
GO: Molecular Function	GO:0003943	N-acetylgalactosamine-4-sulfatase activity		0.053	0.1611	1	2	GALNS
GO: Molecular Function	GO:0004618	phosphoglycerate kinase activity		0.053	0.1611	1	2	PGK1
GO: Molecular Function	GO:0019981	interleukin-6 binding		0.053	0.1611	1	2	IL6ST
GO: Molecular Function	GO:0043199	sulfate binding		0.053	0.1611	1	2	GNS
GO: Molecular Function	GO:0019119	phenanthrene-9,10-epoxide hydrolase activity		0.053	0.1611	1	2	AKR7A2
GO: Molecular Function	GO:0005137	interleukin-5 receptor binding		0.053	0.1611	1	2	SDCBP
GO: Molecular Function	GO:0004921	interleukin-11 receptor activity		0.053	0.1611	1	2	IL6ST
GO: Molecular Function	GO:0005160	transforming growth factor beta receptor binding		0.05359	0.1621	4	53	LRG1,GDF15,LEFTY2,TGFBR3
GO: Molecular Function	GO:0016667	oxidoreductase activity, acting on a sulfur group of donors		0.05359	0.1621	4	53	TXN,QSOX1,TXNDC17,PDIA3
GO: Molecular Function	GO:0060590	ATPase regulator activity		0.0537	0.1621	3	32	PFN1,RAB3A,AGRN
GO: Molecular Function	GO:0032182	ubiquitin-like protein binding		0.05538	0.1669	7	127	TSG101,MVB12A,UCHL3,HSPB1,VCP,USP5,VPS28
GO: Molecular Function	GO:0032550	purine ribonucleoside binding		0.05916	0.1779	60	1828	AARS,HSP90B1,ACLY,STK32B,ACTB,ACTG2,PGK1,CKB,TUBB4A,UBA1,FBP1,PKM,ITM2B,HSPA1A,HSPA2,HSPA5,HSPA6,HSPA8,VCP,HSP90AA1,HSP90AB1,WARS,HYOU1,HSPA4L,RAB3D,CCT2,APRT,RAB6B,ARF3,ARF4,DHX30,RHOC,RUVBL1,CCT5,RAB21,ATP6V1A,CMPK1,MYO6,GARS,RAB11A,PSMC3,PSMC4,HSPA13,RAB10,RAB7A,KIF5B,NME2,RAB1A,RAB2A,RAB3A,RAB3B,RAB27A,RAB27B,RAP1B,TUBA1C,GSS,CCT6A,EEF2,PEBP1,CDC42
GO: Molecular Function	GO:0034236	protein kinase A catalytic subunit binding		0.05998	0.1788	2	15	EZR,PRKAR2A
GO: Molecular Function	GO:0016671	oxidoreductase activity, acting on a sulfur group of donors, disulfide as acceptor		0.05998	0.1788	2	15	TXN,PDIA3
GO: Molecular Function	GO:0005159	insulin-like growth factor receptor binding		0.05998	0.1788	2	15	YWHAG,YWHAH
GO: Molecular Function	GO:0016594	glycine binding		0.05998	0.1788	2	15	GLRA2,GSS
GO: Molecular Function	GO:0032555	purine ribonucleotide binding		0.0601	0.1788	61	1864	AARS,HSP90B1,ACLY,STK32B,ACTB,ACTG2,PGK1,CKB,TUBB4A,UBA1,FBP1,PKM,ITM2B,HSPA1A,HSPA2,HSPA5,HSPA6,HSPA8,VCP,HSP90AA1,HSP90AB1,WARS,HYOU1,HSPA4L,RAB3D,CCT2,APRT,RAB6B,ARF3,ARF4,DHX30,RHOC,RUVBL1,CCT5,PRKAR2A,RAB21,ATP6V1A,CMPK1,MYO6,GARS,RAB11A,PSMC3,PSMC4,HSPA13,RAB10,RAB7A,KIF5B,NME2,RAB1A,RAB2A,RAB3A,RAB3B,RAB27A,RAB27B,RAP1B,TUBA1C,GSS,CCT6A,EEF2,PEBP1,CDC42
GO: Molecular Function	GO:0001883	purine nucleoside binding		0.06067	0.1797	60	1831	AARS,HSP90B1,ACLY,STK32B,ACTB,ACTG2,PGK1,CKB,TUBB4A,UBA1,FBP1,PKM,ITM2B,HSPA1A,HSPA2,HSPA5,HSPA6,HSPA8,VCP,HSP90AA1,HSP90AB1,WARS,HYOU1,HSPA4L,RAB3D,CCT2,APRT,RAB6B,ARF3,ARF4,DHX30,RHOC,RUVBL1,CCT5,RAB21,ATP6V1A,CMPK1,MYO6,GARS,RAB11A,PSMC3,PSMC4,HSPA13,RAB10,RAB7A,KIF5B,NME2,RAB1A,RAB2A,RAB3A,RAB3B,RAB27A,RAB27B,RAP1B,TUBA1C,GSS,CCT6A,EEF2,PEBP1,CDC42
GO: Molecular Function	GO:0032549	ribonucleoside binding		0.06067	0.1797	60	1831	AARS,HSP90B1,ACLY,STK32B,ACTB,ACTG2,PGK1,CKB,TUBB4A,UBA1,FBP1,PKM,ITM2B,HSPA1A,HSPA2,HSPA5,HSPA6,HSPA8,VCP,HSP90AA1,HSP90AB1,WARS,HYOU1,HSPA4L,RAB3D,CCT2,APRT,RAB6B,ARF3,ARF4,DHX30,RHOC,RUVBL1,CCT5,RAB21,ATP6V1A,CMPK1,MYO6,GARS,RAB11A,PSMC3,PSMC4,HSPA13,RAB10,RAB7A,KIF5B,NME2,RAB1A,RAB2A,RAB3A,RAB3B,RAB27A,RAB27B,RAP1B,TUBA1C,GSS,CCT6A,EEF2,PEBP1,CDC42
GO: Molecular Function	GO:0017080	sodium channel regulator activity		0.06232	0.1842	3	34	AGT,YWHAH,PRSS8
GO: Molecular Function	GO:0016763	transferase activity, transferring pentosyl groups		0.06322	0.1864	4	56	HPRT1,APRT,PNP,NAMPT
GO: Molecular Function	GO:0019205	nucleobase-containing compound kinase activity		0.06661	0.1884	4	57	NT5C2,CMPK1,NME2,MPP5
GO: Molecular Function	GO:0030546	receptor activator activity		0.06686	0.1884	3	35	AGT,ANXA2,WNT7A
GO: Molecular Function	GO:0051059	NF-kappaB binding		0.06686	0.1884	3	35	HSPA1A,ANXA4,PSMA6
GO: Molecular Function	GO:0008106	alcohol dehydrogenase (NADP+) activity		0.06686	0.1884	3	35	AKR1A1,ADH5,AKR7A2
GO: Molecular Function	GO:0008093	cytoskeletal adaptor activity		0.06736	0.1884	2	16	BAIAP2,SDCBP
GO: Molecular Function	GO:0005506	iron ion binding		0.06913	0.1884	8	161	PLOD1,ALOX15B,ALKBH8,PLOD3,CALR,LCN2,TF,LTF
GO: Molecular Function	GO:0035639	purine ribonucleoside triphosphate binding		0.07047	0.1884	59	1815	AARS,HSP90B1,ACLY,STK32B,ACTB,ACTG2,PGK1,CKB,TUBB4A,UBA1,PKM,ITM2B,HSPA1A,HSPA2,HSPA5,HSPA6,HSPA8,VCP,HSP90AA1,HSP90AB1,WARS,HYOU1,HSPA4L,RAB3D,CCT2,RAB6B,ARF3,ARF4,DHX30,RHOC,RUVBL1,CCT5,RAB21,ATP6V1A,CMPK1,MYO6,PSMA6,GARS,RAB11A,PSMC3,PSMC4,HSPA13,RAB10,RAB7A,KIF5B,NME2,RAB1A,RAB2A,RAB3A,RAB3B,RAB27A,RAB27B,RAP1B,TUBA1C,GSS,CCT6A,EEF2,PEBP1,CDC42
GO: Molecular Function	GO:0016790	thiolester hydrolase activity		0.07154	0.1884	3	36	ESD,PARK7,FASN
GO: Molecular Function	GO:0004190	aspartic-type endopeptidase activity		0.07154	0.1884	3	36	PGC,PIP,CTSD
GO: Molecular Function	GO:0016854	racemase and epimerase activity		0.07502	0.1884	2	17	NAXE,GALM
GO: Molecular Function	GO:0008252	nucleotidase activity		0.07502	0.1884	2	17	ACPP,NT5C2
GO: Molecular Function	GO:0048018	receptor ligand activity		0.07502	0.1884	2	17	AGT,WNT7A
GO: Molecular Function	GO:0005001	transmembrane receptor protein tyrosine phosphatase activity		0.07502	0.1884	2	17	PTPRF,PTPRS
GO: Molecular Function	GO:0070001	aspartic-type peptidase activity		0.07637	0.1884	3	37	PGC,PIP,CTSD
GO: Molecular Function	GO:0002161	aminoacyl-tRNA editing activity		0.07637	0.1884	3	37	AARS,PLA1A,PRDX6
GO: Molecular Function	GO:0016706	oxidoreductase activity, acting on paired donors, with incorporation or reduction of molecular oxygen, 2-oxoglutarate as one donor, and incorporation of one atom each of oxygen into both donors		0.07736	0.1884	4	60	PLOD1,ALKBH8,PLOD3,P4HB
GO: Molecular Function	GO:0018571	2,3-dihydroxy-p-cumate dioxygenase activity		0.0784	0.1884	1	3	ALOX15B
GO: Molecular Function	GO:0052857	NADPHX epimerase activity		0.0784	0.1884	1	3	NAXE
GO: Molecular Function	GO:0004332	fructose-bisphosphate aldolase activity		0.0784	0.1884	1	3	ALDOA
GO: Molecular Function	GO:0031800	type 3 metabotropic glutamate receptor binding		0.0784	0.1884	1	3	CALM1
GO: Molecular Function	GO:0009041	uridylate kinase activity		0.0784	0.1884	1	3	CMPK1
GO: Molecular Function	GO:0031686	A1 adenosine receptor binding		0.0784	0.1884	1	3	HSPA8
GO: Molecular Function	GO:0018572	3,5-dichlorocatechol 1,2-dioxygenase activity		0.0784	0.1884	1	3	ALOX15B
GO: Molecular Function	GO:0034922	4,5-dihydroxypyrene dioxygenase activity		0.0784	0.1884	1	3	ALOX15B
GO: Molecular Function	GO:0052856	NADHX epimerase activity		0.0784	0.1884	1	3	NAXE
GO: Molecular Function	GO:0034936	4,6-dichloro-3-methylcatechol 1,2-dioxygenase activity		0.0784	0.1884	1	3	ALOX15B
GO: Molecular Function	GO:0034803	3-hydroxy-2-naphthoate 2,3-dioxygenase activity		0.0784	0.1884	1	3	ALOX15B
GO: Molecular Function	GO:0034834	2-mercaptobenzothiazole dioxygenase activity		0.0784	0.1884	1	3	ALOX15B
GO: Molecular Function	GO:0016822	hydrolase activity, acting on acid carbon-carbon bonds		0.0784	0.1884	1	3	FAH
GO: Molecular Function	GO:0005010	insulin-like growth factor-activated receptor activity		0.0784	0.1884	1	3	IGF2R
GO: Molecular Function	GO:0016532	superoxide dismutase copper chaperone activity		0.0784	0.1884	1	3	PARK7
GO: Molecular Function	GO:0004514	nicotinate-nucleotide diphosphorylase (carboxylating) activity		0.0784	0.1884	1	3	NAMPT
GO: Molecular Function	GO:0004069	L-aspartate:2-oxoglutarate aminotransferase activity		0.0784	0.1884	1	3	GOT1
GO: Molecular Function	GO:0018575	chlorocatechol 1,2-dioxygenase activity		0.0784	0.1884	1	3	ALOX15B
GO: Molecular Function	GO:0031711	bradykinin receptor binding		0.0784	0.1884	1	3	ACE
GO: Molecular Function	GO:0008184	glycogen phosphorylase activity		0.0784	0.1884	1	3	PYGB
GO: Molecular Function	GO:0018573	2-aminophenol 1,6-dioxygenase activity		0.0784	0.1884	1	3	ALOX15B
GO: Molecular Function	GO:0034895	pyridine-3,4-diol dioxygenase activity		0.0784	0.1884	1	3	ALOX15B
GO: Molecular Function	GO:0032450	maltose alpha-glucosidase activity		0.0784	0.1884	1	3	GAA
GO: Molecular Function	GO:0018556	2,2',3-trihydroxybiphenyl dioxygenase activity		0.0784	0.1884	1	3	ALOX15B
GO: Molecular Function	GO:0018562	3,4-dihydroxyfluorene 4,4-alpha-dioxygenase activity		0.0784	0.1884	1	3	ALOX15B
GO: Molecular Function	GO:0018564	carbazole 1,9a-dioxygenase activity		0.0784	0.1884	1	3	ALOX15B
GO: Molecular Function	GO:0019959	interleukin-8 binding		0.0784	0.1884	1	3	A2M
GO: Molecular Function	GO:0018555	phenanthrene dioxygenase activity		0.0784	0.1884	1	3	ALOX15B
GO: Molecular Function	GO:0017060	3-galactosyl-N-acetylglucosaminide 4-alpha-L-fucosyltransferase activity		0.0784	0.1884	1	3	FUT5
GO: Molecular Function	GO:0047374	methylumbelliferyl-acetate deacetylase activity		0.0784	0.1884	1	3	ESD
GO: Molecular Function	GO:0004616	phosphogluconate dehydrogenase (decarboxylating) activity		0.0784	0.1884	1	3	PGD
GO: Molecular Function	GO:0034935	tetrachlorobenzene dioxygenase activity		0.0784	0.1884	1	3	ALOX15B
GO: Molecular Function	GO:0018542	2,3-dihydroxy DDT 1,2-dioxygenase activity		0.0784	0.1884	1	3	ALOX15B
GO: Molecular Function	GO:0018563	2,3-dihydroxy-ethylbenzene 1,2-dioxygenase activity		0.0784	0.1884	1	3	ALOX15B
GO: Molecular Function	GO:0018566	1,2-dihydroxynaphthalene-6-sulfonate 1,8a-dioxygenase activity		0.0784	0.1884	1	3	ALOX15B
GO: Molecular Function	GO:0050220	prostaglandin-E synthase activity		0.0784	0.1884	1	3	PTGES3
GO: Molecular Function	GO:0004167	dopachrome isomerase activity		0.0784	0.1884	1	3	DDT
GO: Molecular Function	GO:0018561	2'-aminobiphenyl-2,3-diol 1,2-dioxygenase activity		0.0784	0.1884	1	3	ALOX15B
GO: Molecular Function	GO:0016971	flavin-linked sulfhydryl oxidase activity		0.0784	0.1884	1	3	QSOX1
GO: Molecular Function	GO:0034813	benzo(a)pyrene 7,8-dioxygenase activity		0.0784	0.1884	1	3	ALOX15B
GO: Molecular Function	GO:0035374	chondroitin sulfate binding		0.0784	0.1884	1	3	AGRN
GO: Molecular Function	GO:0018560	protocatechuate 3,4-dioxygenase type II activity		0.0784	0.1884	1	3	ALOX15B
GO: Molecular Function	GO:0004461	lactose synthase activity		0.0784	0.1884	1	3	B4GALT1
GO: Molecular Function	GO:0034934	phenanthrene-4-carboxylate dioxygenase activity		0.0784	0.1884	1	3	ALOX15B
GO: Molecular Function	GO:0034812	9,10-dihydroxybenzo(a)pyrene dioxygenase activity		0.0784	0.1884	1	3	ALOX15B
GO: Molecular Function	GO:0070026	nitric oxide binding		0.0784	0.1884	1	3	GSTP1
GO: Molecular Function	GO:0036403	arachidonate 8(S)-lipoxygenase activity		0.0784	0.1884	1	3	ALOX15B
GO: Molecular Function	GO:0018565	dihydroxydibenzothiophene dioxygenase activity		0.0784	0.1884	1	3	ALOX15B
GO: Molecular Function	GO:0034955	2,3-dihydroxydiphenyl ether dioxygenase activity		0.0784	0.1884	1	3	ALOX15B
GO: Molecular Function	GO:0072510	trivalent inorganic cation transmembrane transporter activity		0.0784	0.1884	1	3	TF
GO: Molecular Function	GO:0018558	5,6-dihydroxy-3-methyl-2-oxo-1,2-dihydroquinoline dioxygenase activity		0.0784	0.1884	1	3	ALOX15B
GO: Molecular Function	GO:0031871	proteinase activated receptor binding		0.0784	0.1884	1	3	PDCD6IP
GO: Molecular Function	GO:0016823	hydrolase activity, acting on acid carbon-carbon bonds, in ketonic substances		0.0784	0.1884	1	3	FAH
GO: Molecular Function	GO:0034543	5-aminosalicylate dioxygenase activity		0.0784	0.1884	1	3	ALOX15B
GO: Molecular Function	GO:0047074	4-hydroxycatechol 1,2-dioxygenase activity		0.0784	0.1884	1	3	ALOX15B
GO: Molecular Function	GO:0042030	ATPase inhibitor activity		0.0784	0.1884	1	3	AGRN
GO: Molecular Function	GO:0018574	2,6-dichloro-p-hydroquinone 1,2-dioxygenase activity		0.0784	0.1884	1	3	ALOX15B
GO: Molecular Function	GO:0018568	3,4-dihydroxyphenanthrene dioxygenase activity		0.0784	0.1884	1	3	ALOX15B
GO: Molecular Function	GO:0019117	dihydroxyfluorene dioxygenase activity		0.0784	0.1884	1	3	ALOX15B
GO: Molecular Function	GO:0018569	hydroquinone 1,2-dioxygenase activity		0.0784	0.1884	1	3	ALOX15B
GO: Molecular Function	GO:0018567	styrene dioxygenase activity		0.0784	0.1884	1	3	ALOX15B
GO: Molecular Function	GO:0034827	1,2-dihydroxy-5,6,7,8-tetrahydronaphthalene extradiol dioxygenase activity		0.0784	0.1884	1	3	ALOX15B
GO: Molecular Function	GO:0030350	iron-responsive element binding		0.0784	0.1884	1	3	ACO1
GO: Molecular Function	GO:0034811	benzo(a)pyrene 9,10-dioxygenase activity		0.0784	0.1884	1	3	ALOX15B
GO: Molecular Function	GO:0018557	1,2-dihydroxyfluorene 1,1-alpha-dioxygenase activity		0.0784	0.1884	1	3	ALOX15B
GO: Molecular Function	GO:0034806	benzo(a)pyrene 11,12-dioxygenase activity		0.0784	0.1884	1	3	ALOX15B
GO: Molecular Function	GO:0034920	pyrene dioxygenase activity		0.0784	0.1884	1	3	ALOX15B
GO: Molecular Function	GO:0019153	protein-disulfide reductase (glutathione) activity		0.0784	0.1884	1	3	PDIA3
GO: Molecular Function	GO:0008241	peptidyl-dipeptidase activity		0.0784	0.1884	1	3	ACE
GO: Molecular Function	GO:0019114	catechol dioxygenase activity		0.0784	0.1884	1	3	ALOX15B
GO: Molecular Function	GO:0018559	1,1-dichloro-2-(dihydroxy-4-chlorophenyl)-(4-chlorophenyl)ethene 1,2-dioxygenase activity		0.0784	0.1884	1	3	ALOX15B
GO: Molecular Function	GO:0036042	long-chain fatty acyl-CoA binding		0.0784	0.1884	1	3	DBI
GO: Molecular Function	GO:0030144	alpha-1,6-mannosylglycoprotein 6-beta-N-acetylglucosaminyltransferase activity		0.0784	0.1884	1	3	CCDC126
GO: Molecular Function	GO:0008449	N-acetylglucosamine-6-sulfatase activity		0.0784	0.1884	1	3	GNS
GO: Molecular Function	GO:0003976	UDP-N-acetylglucosamine-lysosomal-enzyme N-acetylglucosaminephosphotransferase activity		0.0784	0.1884	1	3	GNPTG
GO: Molecular Function	GO:0050211	procollagen galactosyltransferase activity		0.0784	0.1884	1	3	PLOD3
GO: Molecular Function	GO:0031997	N-terminal myristoylation domain binding		0.0784	0.1884	1	3	CALM1
GO: Molecular Function	GO:0034808	benzo(a)pyrene 4,5-dioxygenase activity		0.0784	0.1884	1	3	ALOX15B
GO: Molecular Function	GO:0003953	NAD+ nucleosidase activity		0.0784	0.1884	1	3	CD38
GO: Molecular Function	GO:0080130	L-phenylalanine:2-oxoglutarate aminotransferase activity		0.0784	0.1884	1	3	GOT1
GO: Molecular Function	GO:0060230	lipoprotein lipase activator activity		0.0784	0.1884	1	3	APOH
GO: Molecular Function	GO:0004667	prostaglandin-D synthase activity		0.0784	0.1884	1	3	PTGDS
GO: Molecular Function	GO:0050473	arachidonate 15-lipoxygenase activity		0.0784	0.1884	1	3	ALOX15B
GO: Molecular Function	GO:0034956	diphenyl ether 1,2-dioxygenase activity		0.0784	0.1884	1	3	ALOX15B
GO: Molecular Function	GO:0018570	p-cumate 2,3-dioxygenase activity		0.0784	0.1884	1	3	ALOX15B
GO: Molecular Function	GO:0070653	high-density lipoprotein particle receptor binding		0.0784	0.1884	1	3	APOA1
GO: Molecular Function	GO:0034814	7,8-dihydroxy benzo(a)pyrene dioxygenase activity		0.0784	0.1884	1	3	ALOX15B
GO: Molecular Function	GO:0034810	4,5-dihydroxybenzo(a)pyrene dioxygenase activity		0.0784	0.1884	1	3	ALOX15B
GO: Molecular Function	GO:0004813	alanine-tRNA ligase activity		0.0784	0.1884	1	3	AARS
GO: Molecular Function	GO:0005006	epidermal growth factor-activated receptor activity		0.0784	0.1884	1	3	EFEMP1
GO: Molecular Function	GO:0015091	ferric iron transmembrane transporter activity		0.0784	0.1884	1	3	TF
GO: Molecular Function	GO:0043178	alcohol binding		0.08125	0.1948	6	112	ACPP,APOA1,NPC2,APOD,GC,SERPINA5
GO: Molecular Function	GO:0005501	retinoid binding		0.08133	0.1948	3	38	IGF2R,PTGDS,SERPINA5
GO: Molecular Function	GO:0004519	endonuclease activity		0.08152	0.1949	8	167	RIDA,ANG,DIS3,RNASET2,DNASE2,RNASE13,RNASE1,RNASE4
GO: Molecular Function	GO:0016620	oxidoreductase activity, acting on the aldehyde or oxo group of donors, NAD or NADP as acceptor		0.08644	0.2063	3	39	ADH5,ALDH1A1,GAPDH
GO: Molecular Function	GO:0019903	protein phosphatase binding		0.08845	0.2107	7	142	HSP90B1,VCP,HSP90AA1,CPD,SOD1,IQGAP1,CDH1
GO: Molecular Function	GO:0004029	aldehyde dehydrogenase (NAD) activity		0.09111	0.216	2	19	ADH5,ALDH1A1
GO: Molecular Function	GO:0016646	oxidoreductase activity, acting on the CH-NH group of donors, NAD or NADP as acceptor		0.09111	0.216	2	19	CRYM,BLVRB
GO: Molecular Function	GO:0004550	nucleoside diphosphate kinase activity		0.09111	0.216	2	19	CMPK1,NME2
GO: Molecular Function	GO:0004860	protein kinase inhibitor activity		0.09132	0.2161	5	89	HSPB1,YWHAG,PRKAR2A,DNAJC3,SFN
GO: Molecular Function	GO:0016811	hydrolase activity, acting on carbon-nitrogen (but not peptide) bonds, in linear amides		0.09468	0.2237	5	90	ACR,PARK7,KLK3,ASAH1,BTD
GO: Molecular Function	GO:0047485	protein N-terminus binding		0.09537	0.2249	6	117	CLU,SDCBP,VPS25,YWHAQ,CALM1,EIF5A
GO: Molecular Function	GO:0019840	isoprenoid binding		0.09703	0.2284	3	41	IGF2R,PTGDS,SERPINA5
GO: Molecular Function	GO:0019210	kinase inhibitor activity		0.09811	0.2285	5	91	HSPB1,YWHAG,PRKAR2A,DNAJC3,SFN
GO: Molecular Function	GO:0070064	proline-rich region binding		0.0995	0.2285	2	20	PFN1,BAIAP2
GO: Molecular Function	GO:0048365	Rac GTPase binding		0.1025	0.2285	3	42	SOD1,IQGAP1,RAB7A
GO: Molecular Function	GO:0001847	opsonin receptor activity		0.1031	0.2285	1	4	CD14
GO: Molecular Function	GO:0004090	carbonyl reductase (NADPH) activity		0.1031	0.2285	1	4	CBR1
GO: Molecular Function	GO:0042806	fucose binding		0.1031	0.2285	1	4	ACR
GO: Molecular Function	GO:0004634	phosphopyruvate hydratase activity		0.1031	0.2285	1	4	ENO1
GO: Molecular Function	GO:0048403	brain-derived neurotrophic factor binding		0.1031	0.2285	1	4	A2M
GO: Molecular Function	GO:0004470	malic enzyme activity		0.1031	0.2285	1	4	MDH1
GO: Molecular Function	GO:0017018	myosin phosphatase activity		0.1031	0.2285	1	4	PPP1CB
GO: Molecular Function	GO:0071987	WD40-repeat domain binding		0.1031	0.2285	1	4	CCT6A
GO: Molecular Function	GO:0052796	exo-alpha-(2->8)-sialidase activity		0.1031	0.2285	1	4	NEU1
GO: Molecular Function	GO:0004619	phosphoglycerate mutase activity		0.1031	0.2285	1	4	PGAM1
GO: Molecular Function	GO:0004558	alpha-1,4-glucosidase activity		0.1031	0.2285	1	4	GAA
GO: Molecular Function	GO:0016774	phosphotransferase activity, carboxyl group as acceptor		0.1031	0.2285	1	4	PGK1
GO: Molecular Function	GO:0001016	RNA polymerase III regulatory region DNA binding		0.1031	0.2285	1	4	PRDX5
GO: Molecular Function	GO:0045134	uridine-diphosphatase activity		0.1031	0.2285	1	4	CANT1
GO: Molecular Function	GO:0052832	inositol monophosphate 3-phosphatase activity		0.1031	0.2285	1	4	IMPA1
GO: Molecular Function	GO:0004656	procollagen-proline 4-dioxygenase activity		0.1031	0.2285	1	4	P4HB
GO: Molecular Function	GO:0000293	ferric-chelate reductase activity		0.1031	0.2285	1	4	CYB561
GO: Molecular Function	GO:0016972	thiol oxidase activity		0.1031	0.2285	1	4	QSOX1
GO: Molecular Function	GO:0003985	acetyl-CoA C-acetyltransferase activity		0.1031	0.2285	1	4	ACAT2
GO: Molecular Function	GO:0004082	bisphosphoglycerate mutase activity		0.1031	0.2285	1	4	PGAM1
GO: Molecular Function	GO:0008934	inositol monophosphate 1-phosphatase activity		0.1031	0.2285	1	4	IMPA1
GO: Molecular Function	GO:0051425	PTB domain binding		0.1031	0.2285	1	4	APP
GO: Molecular Function	GO:0046538	2,3-bisphosphoglycerate-dependent phosphoglycerate mutase activity		0.1031	0.2285	1	4	PGAM1
GO: Molecular Function	GO:0070546	L-phenylalanine aminotransferase activity		0.1031	0.2285	1	4	GOT1
GO: Molecular Function	GO:0004771	sterol esterase activity		0.1031	0.2285	1	4	LIPA
GO: Molecular Function	GO:1904288	BAT3 complex binding		0.1031	0.2285	1	4	VCP
GO: Molecular Function	GO:0052794	exo-alpha-(2->3)-sialidase activity		0.1031	0.2285	1	4	NEU1
GO: Molecular Function	GO:0052795	exo-alpha-(2->6)-sialidase activity		0.1031	0.2285	1	4	NEU1
GO: Molecular Function	GO:0004614	phosphoglucomutase activity		0.1031	0.2285	1	4	PGM1
GO: Molecular Function	GO:0005497	androgen binding		0.1031	0.2285	1	4	ALDH1A1
GO: Molecular Function	GO:0052833	inositol monophosphate 4-phosphatase activity		0.1031	0.2285	1	4	IMPA1
GO: Molecular Function	GO:0004127	cytidylate kinase activity		0.1031	0.2285	1	4	CMPK1
GO: Molecular Function	GO:0003945	N-acetyllactosamine synthase activity		0.1031	0.2285	1	4	B4GALT1
GO: Molecular Function	GO:0052834	inositol monophosphate phosphatase activity		0.1031	0.2285	1	4	IMPA1
GO: Molecular Function	GO:0019843	rRNA binding		0.1055	0.2334	4	67	RPLP1,ANG,PTCD3,EEF2
GO: Molecular Function	GO:0031418	L-ascorbic acid binding		0.1081	0.2376	2	21	PLOD1,PLOD3
GO: Molecular Function	GO:0004198	calcium-dependent cysteine-type endopeptidase activity		0.1081	0.2376	2	21	CAPN5,PDCD6
GO: Molecular Function	GO:0042288	MHC class I protein binding		0.1081	0.2376	2	21	VCP,PDIA3
GO: Molecular Function	GO:0015485	cholesterol binding		0.1081	0.2376	3	43	APOA1,NPC2,APOD
GO: Molecular Function	GO:0003725	double-stranded RNA binding		0.1099	0.2411	4	68	ACTN1,HSPA1A,HSP90AB1,DHX30
GO: Molecular Function	GO:0008375	acetylglucosaminyltransferase activity		0.1124	0.2463	5	95	HEXA,HEXB,B4GALT5,CCDC126,B4GALT1
GO: Molecular Function	GO:0016875	ligase activity, forming carbon-oxygen bonds		0.1138	0.2483	3	44	AARS,WARS,GARS
GO: Molecular Function	GO:0004812	aminoacyl-tRNA ligase activity		0.1138	0.2483	3	44	AARS,WARS,GARS
GO: Molecular Function	GO:0016776	phosphotransferase activity, phosphate group as acceptor		0.1138	0.2483	3	44	CMPK1,NME2,MPP5
GO: Molecular Function	GO:0008198	ferrous iron binding		0.1169	0.2537	2	22	PLOD1,TF
GO: Molecular Function	GO:0050998	nitric-oxide synthase binding		0.1169	0.2537	2	22	ACTB,CALM1
GO: Molecular Function	GO:0004806	triglyceride lipase activity		0.1169	0.2537	2	22	LIPG,LPL
GO: Molecular Function	GO:0038024	cargo receptor activity		0.1234	0.2642	4	71	VTN,CFI,LGALS3BP,TMPRSS2
GO: Molecular Function	GO:0043395	heparan sulfate proteoglycan binding		0.1258	0.2642	2	23	GPC1,AGRN
GO: Molecular Function	GO:0001972	retinoic acid binding		0.1258	0.2642	2	23	IGF2R,SERPINA5
GO: Molecular Function	GO:0031420	alkali metal ion binding		0.1258	0.2642	2	23	PKM,IMPA1
GO: Molecular Function	GO:0070325	lipoprotein particle receptor binding		0.1258	0.2642	2	23	HSP90B1,APOA1
GO: Molecular Function	GO:0031210	phosphatidylcholine binding		0.1258	0.2642	2	23	APOA1,SERPINA5
GO: Molecular Function	GO:0001530	lipopolysaccharide binding		0.1258	0.2642	2	23	SPON2,CD14
GO: Molecular Function	GO:0045159	myosin II binding		0.1272	0.2642	1	5	GSN
GO: Molecular Function	GO:0016176	superoxide-generating NADPH oxidase activator activity		0.1272	0.2642	1	5	AGT
GO: Molecular Function	GO:0099602	neurotransmitter receptor regulator activity		0.1272	0.2642	1	5	AGRN
GO: Molecular Function	GO:0004839	ubiquitin activating enzyme activity		0.1272	0.2642	1	5	UBA1
GO: Molecular Function	GO:0038085	vascular endothelial growth factor binding		0.1272	0.2642	1	5	PTN
GO: Molecular Function	GO:0046912	transferase activity, transferring acyl groups, acyl groups converted into alkyl on transfer		0.1272	0.2642	1	5	ACLY
GO: Molecular Function	GO:0047391	alkylglycerophosphoethanolamine phosphodiesterase activity		0.1272	0.2642	1	5	GNB1
GO: Molecular Function	GO:0017040	N-acylsphingosine amidohydrolase activity		0.1272	0.2642	1	5	ASAH1
GO: Molecular Function	GO:0030548	acetylcholine receptor regulator activity		0.1272	0.2642	1	5	AGRN
GO: Molecular Function	GO:0004849	uridine kinase activity		0.1272	0.2642	1	5	CMPK1
GO: Molecular Function	GO:0032190	acrosin binding		0.1272	0.2642	1	5	SERPINA5
GO: Molecular Function	GO:0031404	chloride ion binding		0.1272	0.2642	1	5	ACE
GO: Molecular Function	GO:0070891	lipoteichoic acid binding		0.1272	0.2642	1	5	CD14
GO: Molecular Function	GO:0042392	sphingosine-1-phosphate phosphatase activity		0.1272	0.2642	1	5	PLPP1
GO: Molecular Function	GO:0016453	C-acetyltransferase activity		0.1272	0.2642	1	5	ACAT2
GO: Molecular Function	GO:0016531	copper chaperone activity		0.1272	0.2642	1	5	PARK7
GO: Molecular Function	GO:0005134	interleukin-2 receptor binding		0.1272	0.2642	1	5	ECM1
GO: Molecular Function	GO:0070051	fibrinogen binding		0.1272	0.2642	1	5	THBS1
GO: Molecular Function	GO:0050145	nucleoside phosphate kinase activity		0.1272	0.2642	1	5	CMPK1
GO: Molecular Function	GO:0086007	voltage-gated calcium channel activity involved in cardiac muscle cell action potential		0.1272	0.2642	1	5	CACNA2D1
GO: Molecular Function	GO:0004083	bisphosphoglycerate 2-phosphatase activity		0.1272	0.2642	1	5	PGAM1
GO: Molecular Function	GO:0016019	peptidoglycan receptor activity		0.1272	0.2642	1	5	CD14
GO: Molecular Function	GO:1901981	phosphatidylinositol phosphate binding		0.1306	0.2709	6	128	CFL1,PFN1,ANXA2,ZFYVE28,IQGAP1,SYT7
GO: Molecular Function	GO:0032934	sterol binding		0.1378	0.2853	3	48	APOA1,NPC2,APOD
GO: Molecular Function	GO:0005496	steroid binding		0.1438	0.2954	5	103	ALDH1A1,APOA1,NPC2,APOD,GC
GO: Molecular Function	GO:0016903	oxidoreductase activity, acting on the aldehyde or oxo group of donors		0.1441	0.2954	3	49	ADH5,ALDH1A1,GAPDH
GO: Molecular Function	GO:0051861	glycolipid binding		0.1442	0.2954	2	25	HSPA2,LAMC1
GO: Molecular Function	GO:0016769	transferase activity, transferring nitrogenous groups		0.1442	0.2954	2	25	GAPDH,GOT1
GO: Molecular Function	GO:0051990	(R)-2-hydroxyglutarate dehydrogenase activity		0.1442	0.2954	2	25	ADH5,IDH1
GO: Molecular Function	GO:0016799	hydrolase activity, hydrolyzing N-glycosyl compounds		0.1442	0.2954	2	25	MAN2A1,CD38
GO: Molecular Function	GO:0005125	cytokine activity		0.1446	0.2954	9	222	FAM3D,FAM3C,GDF15,WNT7A,GPI,FAM3B,LEFTY2,NAMPT,TIMP1
GO: Molecular Function	GO:0019888	protein phosphatase regulator activity		0.1474	0.2954	4	76	PPP1R7,PPP2R1A,PTN,CALM1
GO: Molecular Function	GO:0016887	ATPase activity		0.1481	0.2954	16	446	CLU,HSPA1A,HSPA5,HSPA6,HSPA8,VCP,HSP90AA1,ANXA1,ANXA5,DHX30,RUVBL1,ATP6V1A,MYL6,PSMC3,PSMC4,KIF5B
GO: Molecular Function	GO:0004645	phosphorylase activity		0.1507	0.2954	1	6	PYGB
GO: Molecular Function	GO:0030020	extracellular matrix structural constituent conferring tensile strength		0.1507	0.2954	1	6	COL12A1
GO: Molecular Function	GO:0052715	mannosyl-diinositol phosphorylceramide phospholipase activity		0.1507	0.2954	1	6	SMPDL3A
GO: Molecular Function	GO:0008131	primary amine oxidase activity		0.1507	0.2954	1	6	AOC1
GO: Molecular Function	GO:0086083	cell adhesive protein binding involved in bundle of His cell-Purkinje myocyte communication		0.1507	0.2954	1	6	DSC2
GO: Molecular Function	GO:0036435	K48-linked polyubiquitin modification-dependent protein binding		0.1507	0.2954	1	6	VCP
GO: Molecular Function	GO:0016724	oxidoreductase activity, oxidizing metal ions, oxygen as acceptor		0.1507	0.2954	1	6	CP
GO: Molecular Function	GO:0044688	7,8-dihydro-D-neopterin 2',3'-cyclic phosphate phosphodiesterase activity		0.1507	0.2954	1	6	SMPDL3A
GO: Molecular Function	GO:0052712	inositol phosphosphingolipid phospholipase activity		0.1507	0.2954	1	6	SMPDL3A
GO: Molecular Function	GO:0045545	syndecan binding		0.1507	0.2954	1	6	SDCBP
GO: Molecular Function	GO:0004111	creatine kinase activity		0.1507	0.2954	1	6	CKB
GO: Molecular Function	GO:0060228	phosphatidylcholine-sterol O-acyltransferase activator activity		0.1507	0.2954	1	6	APOA1
GO: Molecular Function	GO:0043912	D-lysine oxidase activity		0.1507	0.2954	1	6	AOC1
GO: Molecular Function	GO:0004322	ferroxidase activity		0.1507	0.2954	1	6	CP
GO: Molecular Function	GO:0016933	extracellularly glycine-gated ion channel activity		0.1507	0.2954	1	6	GLRA2
GO: Molecular Function	GO:0061133	endopeptidase activator activity		0.1507	0.2954	1	6	PSME1
GO: Molecular Function	GO:0052714	mannosyl-inositol phosphorylceramide phospholipase activity		0.1507	0.2954	1	6	SMPDL3A
GO: Molecular Function	GO:0016934	extracellularly glycine-gated chloride channel activity		0.1507	0.2954	1	6	GLRA2
GO: Molecular Function	GO:0052713	inositol phosphorylceramide phospholipase activity		0.1507	0.2954	1	6	SMPDL3A
GO: Molecular Function	GO:0004120	photoreceptor cyclic-nucleotide phosphodiesterase activity		0.1507	0.2954	1	6	SMPDL3A
GO: Molecular Function	GO:0036374	glutathione hydrolase activity		0.1507	0.2954	1	6	GGT1
GO: Molecular Function	GO:0016530	metallochaperone activity		0.1507	0.2954	1	6	PARK7
GO: Molecular Function	GO:0004064	arylesterase activity		0.1507	0.2954	1	6	CA2
GO: Molecular Function	GO:0043908	Ser(Gly)-tRNA(Ala) hydrolase activity		0.1536	0.2954	2	26	PLA1A,PRDX6
GO: Molecular Function	GO:0043906	Ala-tRNA(Pro) hydrolase activity		0.1536	0.2954	2	26	PLA1A,PRDX6
GO: Molecular Function	GO:0043907	Cys-tRNA(Pro) hydrolase activity		0.1536	0.2954	2	26	PLA1A,PRDX6
GO: Molecular Function	GO:0034892	endosulfan lactone lactonase activity		0.1536	0.2954	2	26	PLA1A,PRDX6
GO: Molecular Function	GO:0018734	butyrolactone hydrolase activity		0.1536	0.2954	2	26	PLA1A,PRDX6
GO: Molecular Function	GO:0080031	methyl salicylate esterase activity		0.1536	0.2954	2	26	PLA1A,PRDX6
GO: Molecular Function	GO:0016755	transferase activity, transferring amino-acyl groups		0.1536	0.2954	2	26	GGT1,TGM4
GO: Molecular Function	GO:0010296	prenylcysteine methylesterase activity		0.1536	0.2954	2	26	PLA1A,PRDX6
GO: Molecular Function	GO:0035460	L-ascorbate 6-phosphate lactonase activity		0.1536	0.2954	2	26	PLA1A,PRDX6
GO: Molecular Function	GO:0018732	sulfolactone hydrolase activity		0.1536	0.2954	2	26	PLA1A,PRDX6
GO: Molecular Function	GO:0080030	methyl indole-3-acetate esterase activity		0.1536	0.2954	2	26	PLA1A,PRDX6
GO: Molecular Function	GO:0052767	mannosyl-oligosaccharide 1,6-alpha-mannosidase activity		0.1536	0.2954	2	26	PLA1A,PRDX6
GO: Molecular Function	GO:0043905	Ser-tRNA(Thr) hydrolase activity		0.1536	0.2954	2	26	PLA1A,PRDX6
GO: Molecular Function	GO:0052768	mannosyl-oligosaccharide 1,3-alpha-mannosidase activity		0.1536	0.2954	2	26	PLA1A,PRDX6
GO: Molecular Function	GO:0018731	1-oxa-2-oxocycloheptane lactonase activity		0.1536	0.2954	2	26	PLA1A,PRDX6
GO: Molecular Function	GO:0071814	protein-lipid complex binding		0.1536	0.2954	2	26	APOA1,THBS1
GO: Molecular Function	GO:0047376	all-trans-retinyl-palmitate hydrolase, all-trans-retinol forming activity		0.1536	0.2954	2	26	PLA1A,PRDX6
GO: Molecular Function	GO:0071813	lipoprotein particle binding		0.1536	0.2954	2	26	APOA1,THBS1
GO: Molecular Function	GO:0080032	methyl jasmonate esterase activity		0.1536	0.2954	2	26	PLA1A,PRDX6
GO: Molecular Function	GO:0005126	cytokine receptor binding		0.1564	0.2996	11	289	LRG1,SDCBP,GDF15,IL6ST,ERAP1,TMBIM1,ITCH,ECM1,LEFTY2,TGFBR3,LIFR
GO: Molecular Function	GO:0031072	heat shock protein binding		0.1565	0.2996	5	106	HSPA1A,HSPA6,HSPA8,PTGES3,ENO1
GO: Molecular Function	GO:0016830	carbon-carbon lyase activity		0.1568	0.2996	3	51	ALDOA,DDT,GOT1
GO: Molecular Function	GO:0030145	manganese ion binding		0.1568	0.2996	3	51	XPNPEP1,IMPA1,B4GALT1
GO: Molecular Function	GO:0003755	peptidyl-prolyl cis-trans isomerase activity		0.1568	0.2996	3	51	PPIA,PPIB,PPIC
GO: Molecular Function	GO:0051219	phosphoprotein binding		0.1575	0.2997	4	78	YWHAB,YWHAE,IGF2R,SFN
GO: Molecular Function	GO:0030295	protein kinase activator activity		0.1575	0.2997	4	78	RPLP1,IQGAP1,CALM1,LTF
GO: Molecular Function	GO:0005201	extracellular matrix structural constituent		0.1575	0.2997	4	78	FBLN2,COL12A1,MUC6,LAMC1
GO: Molecular Function	GO:0051723	protein methylesterase activity		0.1631	0.3086	2	27	PLA1A,PRDX6
GO: Molecular Function	GO:0016702	oxidoreductase activity, acting on single donors with incorporation of molecular oxygen, incorporation of two atoms of oxygen		0.1631	0.3086	2	27	HGD,ALOX15B
GO: Molecular Function	GO:0019201	nucleotide kinase activity		0.1631	0.3086	2	27	CMPK1,MPP5
GO: Molecular Function	GO:0018733	3,4-dihydrocoumarin hydrolase activity		0.1631	0.3086	2	27	PLA1A,PRDX6
GO: Molecular Function	GO:0004518	nuclease activity		0.1674	0.3163	9	230	RIDA,ANG,DIS3,RNASET2,AZGP1,DNASE2,RNASE13,RNASE1,RNASE4
GO: Molecular Function	GO:0016859	cis-trans isomerase activity		0.1699	0.3187	3	53	PPIA,PPIB,PPIC
GO: Molecular Function	GO:0016247	channel regulator activity		0.1713	0.3187	6	139	CRISP1,AGT,YWHAE,YWHAH,PRSS8,GNB2
GO: Molecular Function	GO:0016701	oxidoreductase activity, acting on single donors with incorporation of molecular oxygen		0.1727	0.3187	2	28	HGD,ALOX15B
GO: Molecular Function	GO:0050253	retinyl-palmitate esterase activity		0.1727	0.3187	2	28	PLA1A,PRDX6
GO: Molecular Function	GO:0004448	isocitrate dehydrogenase activity		0.1727	0.3187	2	28	ADH5,IDH1
GO: Molecular Function	GO:0045499	chemorepellent activity		0.1727	0.3187	2	28	SEMA3C,APOA1
GO: Molecular Function	GO:0045309	protein phosphorylated amino acid binding		0.1727	0.3187	2	28	YWHAB,YWHAE
GO: Molecular Function	GO:0008097	5S rRNA binding		0.1735	0.3187	1	7	EEF2
GO: Molecular Function	GO:0003988	acetyl-CoA C-acyltransferase activity		0.1735	0.3187	1	7	ACAT2
GO: Molecular Function	GO:0019958	C-X-C chemokine binding		0.1735	0.3187	1	7	A2M
GO: Molecular Function	GO:0004673	protein histidine kinase activity		0.1735	0.3187	1	7	NME2
GO: Molecular Function	GO:0015922	aspartate oxidase activity		0.1735	0.3187	1	7	AOC1
GO: Molecular Function	GO:0043140	ATP-dependent 3'-5' DNA helicase activity		0.1735	0.3187	1	7	RUVBL1
GO: Molecular Function	GO:0015037	peptide disulfide oxidoreductase activity		0.1735	0.3187	1	7	TXN
GO: Molecular Function	GO:0016443	bidentate ribonuclease III activity		0.1735	0.3187	1	7	DIS3
GO: Molecular Function	GO:0031685	adenosine receptor binding		0.1735	0.3187	1	7	HSPA8
GO: Molecular Function	GO:0048406	nerve growth factor binding		0.1735	0.3187	1	7	A2M
GO: Molecular Function	GO:0001094	TFIID-class transcription factor binding		0.1735	0.3187	1	7	RUVBL1
GO: Molecular Function	GO:0016670	oxidoreductase activity, acting on a sulfur group of donors, oxygen as acceptor		0.1735	0.3187	1	7	QSOX1
GO: Molecular Function	GO:0016615	malate dehydrogenase activity		0.1735	0.3187	1	7	MDH1
GO: Molecular Function	GO:0033265	choline binding		0.1735	0.3187	1	7	ACPP
GO: Molecular Function	GO:0043022	ribosome binding		0.1766	0.3231	3	54	HSPA5,EEF2,EIF5A
GO: Molecular Function	GO:0030170	pyridoxal phosphate binding		0.1766	0.3231	3	54	ALB,PYGB,GOT1
GO: Molecular Function	GO:0050997	quaternary ammonium group binding		0.1766	0.3231	3	54	ACPP,APOA1,SERPINA5
GO: Molecular Function	GO:1902936	phosphatidylinositol bisphosphate binding		0.1784	0.3261	4	82	CFL1,PFN1,ANXA2,SYT7
GO: Molecular Function	GO:0003723	RNA binding		0.18	0.3286	50	1632	RIDA,AARS,HSP90B1,RPLP1,ACO1,PARK7,ACTN1,PFN1,TXN,FASN,UBA1,PKM,ALDOA,HSPA1A,HSPA8,HSPB1,VCP,HSP90AA1,HSP90AB1,EZR,ANG,ANXA1,ANXA2,ANXA7,ANXA11,APEH,MSI1,PPIA,PPIB,YWHAE,YWHAG,DIS3,YWHAZ,DHX30,RNASET2,PSMA6,NAP1L1,GDI2,ALKBH8,PTCD3,CALR,PDIA3,CCT6A,EEF1G,EEF2,P4HB,PEBP1,PRDX1,EIF5A,ENO1
GO: Molecular Function	GO:0000287	magnesium ion binding		0.1908	0.3462	8	206	EPHX2,PGM1,HPRT1,PKM,IDH1,IMPA1,GSS,ENO1
GO: Molecular Function	GO:0016645	oxidoreductase activity, acting on the CH-NH group of donors		0.1921	0.3462	2	30	CRYM,BLVRB
GO: Molecular Function	GO:0042826	histone deacetylase binding		0.1923	0.3462	5	114	HSPA1A,HSP90AA1,HSP90AB1,YWHAB,YWHAE
GO: Molecular Function	GO:0004119	cGMP-inhibited cyclic-nucleotide phosphodiesterase activity		0.1957	0.3462	1	8	SMPDL3A
GO: Molecular Function	GO:0005499	vitamin D binding		0.1957	0.3462	1	8	GC
GO: Molecular Function	GO:0019763	immunoglobulin receptor activity		0.1957	0.3462	1	8	PIGR
GO: Molecular Function	GO:0003884	D-amino-acid oxidase activity		0.1957	0.3462	1	8	AOC1
GO: Molecular Function	GO:0004022	alcohol dehydrogenase (NAD) activity		0.1957	0.3462	1	8	ADH5
GO: Molecular Function	GO:0005114	type II transforming growth factor beta receptor binding		0.1957	0.3462	1	8	TGFBR3
GO: Molecular Function	GO:0004534	5'-3' exoribonuclease activity		0.1957	0.3462	1	8	DIS3
GO: Molecular Function	GO:0001091	RNA polymerase II basal transcription factor binding		0.1957	0.3462	1	8	RUVBL1
GO: Molecular Function	GO:0036310	annealing helicase activity		0.1957	0.3462	1	8	ANXA1
GO: Molecular Function	GO:0050897	cobalt ion binding		0.1957	0.3462	1	8	CPE
GO: Molecular Function	GO:0030368	interleukin-17 receptor activity		0.1957	0.3462	1	8	IL6ST
GO: Molecular Function	GO:0001758	retinal dehydrogenase activity		0.1957	0.3462	1	8	ALDH1A1
GO: Molecular Function	GO:0008603	cAMP-dependent protein kinase regulator activity		0.1957	0.3462	1	8	PRKAR2A
GO: Molecular Function	GO:0031545	peptidyl-proline 4-dioxygenase activity		0.1957	0.3462	1	8	P4HB
GO: Molecular Function	GO:0071933	Arp2/3 complex binding		0.1957	0.3462	1	8	CORO1B
GO: Molecular Function	GO:0015232	heme transporter activity		0.1957	0.3462	1	8	HPX
GO: Molecular Function	GO:0004908	interleukin-1 receptor activity		0.1957	0.3462	1	8	IL1RL1
GO: Molecular Function	GO:0072542	protein phosphatase activator activity		0.1957	0.3462	1	8	CALM1
GO: Molecular Function	GO:0005237	inhibitory extracellular ligand-gated ion channel activity		0.1957	0.3462	1	8	GLRA2
GO: Molecular Function	GO:0030957	Tat protein binding		0.1957	0.3462	1	8	ACTB
GO: Molecular Function	GO:0015220	choline transmembrane transporter activity		0.1957	0.3462	1	8	SLC44A4
GO: Molecular Function	GO:0019209	kinase activator activity		0.2002	0.3537	4	86	RPLP1,IQGAP1,CALM1,LTF
GO: Molecular Function	GO:0009055	electron transfer activity		0.2017	0.3559	5	116	AKR1A1,ADH5,UGDH,AKR7A2,PHGDH
GO: Molecular Function	GO:0042287	MHC protein binding		0.2019	0.3559	2	31	VCP,PDIA3
GO: Molecular Function	GO:0016758	transferase activity, transferring hexosyl groups		0.2045	0.3599	8	210	HEXA,HEXB,B4GALT5,FUT5,CCDC126,B4GALT1,PYGB,PLOD3
GO: Molecular Function	GO:0016810	hydrolase activity, acting on carbon-nitrogen (but not peptide) bonds		0.2079	0.3655	6	148	DDAH1,ACR,PARK7,KLK3,ASAH1,BTD
GO: Molecular Function	GO:0046920	alpha-(1->3)-fucosyltransferase activity		0.2108	0.3698	3	59	B4GALT5,FUT5,B4GALT1
GO: Molecular Function	GO:0005546	phosphatidylinositol-4,5-bisphosphate binding		0.2108	0.3698	3	59	PFN1,ANXA2,SYT7
GO: Molecular Function	GO:0019208	phosphatase regulator activity		0.2113	0.3702	4	88	PPP1R7,PPP2R1A,PTN,CALM1
GO: Molecular Function	GO:0045296	cadherin binding		0.2118	0.3703	2	32	VCL,OLFM4
GO: Molecular Function	GO:1901567	fatty acid derivative binding		0.2173	0.3703	1	9	HSPA8
GO: Molecular Function	GO:0043495	protein membrane anchor		0.2173	0.3703	1	9	PDCD6
GO: Molecular Function	GO:0050542	icosanoid binding		0.2173	0.3703	1	9	HSPA8
GO: Molecular Function	GO:0004117	calmodulin-dependent cyclic-nucleotide phosphodiesterase activity		0.2173	0.3703	1	9	SMPDL3A
GO: Molecular Function	GO:0034843	2-oxoglutaryl-CoA thioesterase activity		0.2173	0.3703	1	9	PARK7
GO: Molecular Function	GO:0003810	protein-glutamine gamma-glutamyltransferase activity		0.2173	0.3703	1	9	TGM4
GO: Molecular Function	GO:0004028	3-chloroallyl aldehyde dehydrogenase activity		0.2173	0.3703	1	9	ALDH1A1
GO: Molecular Function	GO:0030346	protein phosphatase 2B binding		0.2173	0.3703	1	9	SOD1
GO: Molecular Function	GO:0008035	high-density lipoprotein particle binding		0.2173	0.3703	1	9	APOA1
GO: Molecular Function	GO:0004118	cGMP-stimulated cyclic-nucleotide phosphodiesterase activity		0.2173	0.3703	1	9	SMPDL3A
GO: Molecular Function	GO:0035256	G-protein coupled glutamate receptor binding		0.2173	0.3703	1	9	CALM1
GO: Molecular Function	GO:0004862	cAMP-dependent protein kinase inhibitor activity		0.2173	0.3703	1	9	PRKAR2A
GO: Molecular Function	GO:0047498	calcium-dependent phospholipase A2 activity		0.2173	0.3703	1	9	PLA2G2A
GO: Molecular Function	GO:0044466	glutaryl-CoA hydrolase activity		0.2173	0.3703	1	9	PARK7
GO: Molecular Function	GO:0032393	MHC class I receptor activity		0.2173	0.3703	1	9	CTSH
GO: Molecular Function	GO:0043208	glycosphingolipid binding		0.2173	0.3703	1	9	LAMC1
GO: Molecular Function	GO:0048495	Roundabout binding		0.2173	0.3703	1	9	FMOD
GO: Molecular Function	GO:0019966	interleukin-1 binding		0.2173	0.3703	1	9	A2M
GO: Molecular Function	GO:0016832	aldehyde-lyase activity		0.2173	0.3703	1	9	ALDOA
GO: Molecular Function	GO:0034869	2,4,4-trimethyl-3-oxopentanoyl-CoA thioesterase activity		0.2173	0.3703	1	9	PARK7
GO: Molecular Function	GO:0034946	3-isopropylbut-3-enoyl-CoA thioesterase activity		0.2173	0.3703	1	9	PARK7
GO: Molecular Function	GO:0030971	receptor tyrosine kinase binding		0.2179	0.3709	3	60	ANXA5,YWHAG,PTPRF
GO: Molecular Function	GO:0043021	ribonucleoprotein complex binding		0.2209	0.3755	5	120	HSPA5,PTCD3,ITCH,EEF2,EIF5A
GO: Molecular Function	GO:0001786	phosphatidylserine binding		0.2217	0.3756	2	33	HSPA8,THBS1
GO: Molecular Function	GO:0015036	disulfide oxidoreductase activity		0.2217	0.3756	2	33	TXN,PDIA3
GO: Molecular Function	GO:0001965	G-protein alpha-subunit binding		0.2217	0.3756	2	33	IGF2R,NUCB1
GO: Molecular Function	GO:0019842	vitamin binding		0.2227	0.3767	4	90	FASN,PLOD1,GC,PLOD3
GO: Molecular Function	GO:0019902	phosphatase binding		0.2381	0.395	7	187	HSP90B1,VCP,HSP90AA1,CPD,SOD1,IQGAP1,CDH1
GO: Molecular Function	GO:0000774	adenyl-nucleotide exchange factor activity		0.2383	0.395	1	10	PFN1
GO: Molecular Function	GO:0070180	large ribosomal subunit rRNA binding		0.2383	0.395	1	10	RPLP1
GO: Molecular Function	GO:0008641	ubiquitin-like modifier activating enzyme activity		0.2383	0.395	1	10	UBA1
GO: Molecular Function	GO:0008199	ferric iron binding		0.2383	0.395	1	10	TF
GO: Molecular Function	GO:0033130	acetylcholine receptor binding		0.2383	0.395	1	10	APP
GO: Molecular Function	GO:0016857	racemase and epimerase activity, acting on carbohydrates and derivatives		0.2383	0.395	1	10	GALM
GO: Molecular Function	GO:0033691	sialic acid binding		0.2383	0.395	1	10	AGRN
GO: Molecular Function	GO:0005381	iron ion transmembrane transporter activity		0.2383	0.395	1	10	TF
GO: Molecular Function	GO:0016889	endodeoxyribonuclease activity, producing 3'-phosphomonoesters		0.2383	0.395	1	10	DNASE2
GO: Molecular Function	GO:0086080	protein binding involved in heterotypic cell-cell adhesion		0.2383	0.395	1	10	DSC2
GO: Molecular Function	GO:0008440	inositol-1,4,5-trisphosphate 3-kinase activity		0.2383	0.395	1	10	CALM1
GO: Molecular Function	GO:0005024	transforming growth factor beta-activated receptor activity		0.2383	0.395	1	10	TGFBR3
GO: Molecular Function	GO:0004525	ribonuclease III activity		0.2383	0.395	1	10	DIS3
GO: Molecular Function	GO:0032296	double-stranded RNA-specific ribonuclease activity		0.2383	0.395	1	10	DIS3
GO: Molecular Function	GO:0043008	ATP-dependent protein binding		0.2383	0.395	1	10	DNAJC5
GO: Molecular Function	GO:0016668	oxidoreductase activity, acting on a sulfur group of donors, NAD(P) as acceptor		0.2383	0.395	1	10	TXNDC17
GO: Molecular Function	GO:0008417	fucosyltransferase activity		0.2464	0.4079	3	64	B4GALT5,FUT5,B4GALT1
GO: Molecular Function	GO:0016831	carboxy-lyase activity		0.2517	0.4162	2	36	DDT,GOT1
GO: Molecular Function	GO:0008195	phosphatidate phosphatase activity		0.2588	0.4219	1	11	PLPP1
GO: Molecular Function	GO:0051010	microtubule plus-end binding		0.2588	0.4219	1	11	MLPH
GO: Molecular Function	GO:0043121	neurotrophin binding		0.2588	0.4219	1	11	A2M
GO: Molecular Function	GO:0017070	U6 snRNA binding		0.2588	0.4219	1	11	EIF5A
GO: Molecular Function	GO:0036122	BMP binding		0.2588	0.4219	1	11	AGRN
GO: Molecular Function	GO:0004312	fatty acid synthase activity		0.2588	0.4219	1	11	FASN
GO: Molecular Function	GO:0019211	phosphatase activator activity		0.2588	0.4219	1	11	CALM1
GO: Molecular Function	GO:0016813	hydrolase activity, acting on carbon-nitrogen (but not peptide) bonds, in linear amidines		0.2588	0.4219	1	11	DDAH1
GO: Molecular Function	GO:0016846	carbon-sulfur lyase activity		0.2588	0.4219	1	11	GLO1
GO: Molecular Function	GO:0048027	mRNA 5'-UTR binding		0.2588	0.4219	1	11	ACO1
GO: Molecular Function	GO:0070492	oligosaccharide binding		0.2588	0.4219	1	11	CHID1
GO: Molecular Function	GO:0005388	calcium-transporting ATPase activity		0.2588	0.4219	1	11	ANXA5
GO: Molecular Function	GO:1990782	protein tyrosine kinase binding		0.2609	0.4248	3	66	ANXA5,YWHAG,PTPRF
GO: Molecular Function	GO:0004629	phospholipase C activity		0.2617	0.4257	2	37	SMPDL3A,PDIA3
GO: Molecular Function	GO:0008194	UDP-glycosyltransferase activity		0.265	0.4305	6	161	HEXA,HEXB,B4GALT5,CCDC126,B4GALT1,PLOD3
GO: Molecular Function	GO:0008081	phosphoric diester hydrolase activity		0.2694	0.4372	4	98	SMPD1,SMPDL3A,GNB1,PDIA3
GO: Molecular Function	GO:0019798	procollagen-proline dioxygenase activity		0.2717	0.4394	2	38	ALKBH8,P4HB
GO: Molecular Function	GO:0005109	frizzled binding		0.2717	0.4394	2	38	SDCBP,WNT7A
GO: Molecular Function	GO:0005246	calcium channel regulator activity		0.2717	0.4394	2	38	CRISP1,GNB2
GO: Molecular Function	GO:0097617	annealing activity		0.2787	0.4465	1	12	ANXA1
GO: Molecular Function	GO:0004065	arylsulfatase activity		0.2787	0.4465	1	12	ARSA
GO: Molecular Function	GO:0031681	G-protein beta-subunit binding		0.2787	0.4465	1	12	CCT5
GO: Molecular Function	GO:0008179	adenylate cyclase binding		0.2787	0.4465	1	12	CALM1
GO: Molecular Function	GO:0098632	cell-cell adhesion mediator activity		0.2787	0.4465	1	12	DSC2
GO: Molecular Function	GO:0019864	IgG binding		0.2787	0.4465	1	12	PIP
GO: Molecular Function	GO:0043024	ribosomal small subunit binding		0.2787	0.4465	1	12	PTCD3
GO: Molecular Function	GO:0017166	vinculin binding		0.2787	0.4465	1	12	ACTN1
GO: Molecular Function	GO:0042623	ATPase activity, coupled		0.2808	0.4494	11	332	HSPA1A,HSPA6,HSPA8,ANXA1,ANXA5,DHX30,RUVBL1,ATP6V1A,MYL6,PSMC3,PSMC4
GO: Molecular Function	GO:0031267	small GTPase binding		0.2909	0.465	10	301	PFN1,MLPH,VCL,ANXA2,SOD1,GDI2,IQGAP1,RAB7A,DOCK9,SYTL1
GO: Molecular Function	GO:0019198	transmembrane receptor protein phosphatase activity		0.2918	0.4658	2	40	PTPRF,PTPRS
GO: Molecular Function	GO:0046527	glucosyltransferase activity		0.2975	0.4721	3	71	B4GALT5,B4GALT1,PLOD3
GO: Molecular Function	GO:0043138	3'-5' DNA helicase activity		0.2981	0.4721	1	13	RUVBL1
GO: Molecular Function	GO:0005092	GDP-dissociation inhibitor activity		0.2981	0.4721	1	13	GDI2
GO: Molecular Function	GO:0030898	actin-dependent ATPase activity		0.2981	0.4721	1	13	MYL6
GO: Molecular Function	GO:0048185	activin binding		0.2981	0.4721	1	13	TGFBR3
GO: Molecular Function	GO:0045295	gamma-catenin binding		0.2981	0.4721	1	13	CDH1
GO: Molecular Function	GO:0005536	glucose binding		0.2981	0.4721	1	13	UGP2
GO: Molecular Function	GO:0048487	beta-tubulin binding		0.3018	0.4768	2	41	CCT5,B4GALT1
GO: Molecular Function	GO:0050681	androgen receptor binding		0.3018	0.4768	2	41	PARK7,CALR
GO: Molecular Function	GO:0031543	peptidyl-proline dioxygenase activity		0.3117	0.4915	2	42	ALKBH8,P4HB
GO: Molecular Function	GO:0019894	kinesin binding		0.3117	0.4915	2	42	ACTB,CLSTN1
GO: Molecular Function	GO:0031432	titin binding		0.3169	0.4957	1	14	CALM1
GO: Molecular Function	GO:0016863	intramolecular oxidoreductase activity, transposing C=C bonds		0.3169	0.4957	1	14	DDT
GO: Molecular Function	GO:0005095	GTPase inhibitor activity		0.3169	0.4957	1	14	IQGAP1
GO: Molecular Function	GO:0017127	cholesterol transporter activity		0.3169	0.4957	1	14	APOA1
GO: Molecular Function	GO:0048156	tau protein binding		0.3169	0.4957	1	14	HSP90AA1
GO: Molecular Function	GO:0004385	guanylate kinase activity		0.3169	0.4957	1	14	MPP5
GO: Molecular Function	GO:0003720	telomerase activity		0.3169	0.4957	1	14	PTGES3
GO: Molecular Function	GO:0035250	UDP-galactosyltransferase activity		0.3196	0.4994	3	74	B4GALT5,B4GALT1,PLOD3
GO: Molecular Function	GO:0016641	oxidoreductase activity, acting on the CH-NH2 group of donors, oxygen as acceptor		0.3353	0.5203	1	15	AOC1
GO: Molecular Function	GO:0038191	neuropilin binding		0.3353	0.5203	1	15	SEMA3C
GO: Molecular Function	GO:0030955	potassium ion binding		0.3353	0.5203	1	15	PKM
GO: Molecular Function	GO:0070402	NADPH binding		0.3353	0.5203	1	15	FASN
GO: Molecular Function	GO:0070567	cytidylyltransferase activity		0.3353	0.5203	1	15	NANS
GO: Molecular Function	GO:0010181	FMN binding		0.3353	0.5203	1	15	CREG1
GO: Molecular Function	GO:0052745	inositol phosphate phosphatase activity		0.3414	0.5291	2	45	MINPP1,IMPA1
GO: Molecular Function	GO:0008378	galactosyltransferase activity		0.3418	0.5291	3	77	B4GALT5,B4GALT1,PLOD3
GO: Molecular Function	GO:0005200	structural constituent of cytoskeleton		0.3421	0.5291	4	110	ACTB,TUBB4A,TUBA1C,AGRN
GO: Molecular Function	GO:0017016	Ras GTPase binding		0.3427	0.5295	9	281	PFN1,MLPH,VCL,ANXA2,SOD1,IQGAP1,RAB7A,DOCK9,SYTL1
GO: Molecular Function	GO:0043028	cysteine-type endopeptidase regulator activity involved in apoptotic process		0.3512	0.5303	2	46	PRDX5,CTSH
GO: Molecular Function	GO:0008418	protein-N-terminal asparagine amidohydrolase activity		0.3531	0.5303	1	16	PARK7
GO: Molecular Function	GO:0034876	isonicotinic acid hydrazide hydrolase activity		0.3531	0.5303	1	16	PARK7
GO: Molecular Function	GO:0008759	UDP-3-O-[3-hydroxymyristoyl] N-acetylglucosamine deacetylase activity		0.3531	0.5303	1	16	PARK7
GO: Molecular Function	GO:0034885	gamma-N-formylaminovinylacetate hydrolase activity		0.3531	0.5303	1	16	PARK7
GO: Molecular Function	GO:0043141	ATP-dependent 5'-3' DNA helicase activity		0.3531	0.5303	1	16	RUVBL1
GO: Molecular Function	GO:0034237	protein kinase A regulatory subunit binding		0.3531	0.5303	1	16	EZR
GO: Molecular Function	GO:0019215	intermediate filament binding		0.3531	0.5303	1	16	NME2
GO: Molecular Function	GO:0052790	chitooligosaccharide deacetylase activity		0.3531	0.5303	1	16	PARK7
GO: Molecular Function	GO:0034781	N-cyclohexylformamide amidohydrolase activity		0.3531	0.5303	1	16	PARK7
GO: Molecular Function	GO:0034185	apolipoprotein binding		0.3531	0.5303	1	16	LPL
GO: Molecular Function	GO:0018748	iprodione amidohydrolase activity		0.3531	0.5303	1	16	PARK7
GO: Molecular Function	GO:0043748	O-succinylbenzoate synthase activity		0.3531	0.5303	1	16	PARK7
GO: Molecular Function	GO:0047419	N-acetylgalactosamine-6-phosphate deacetylase activity		0.3531	0.5303	1	16	PARK7
GO: Molecular Function	GO:0034571	4'-(2-hydroxyisopropyl)phenylurea amidohydrolase activity		0.3531	0.5303	1	16	PARK7
GO: Molecular Function	GO:0043747	N2-acetyl-L-lysine deacetylase activity		0.3531	0.5303	1	16	PARK7
GO: Molecular Function	GO:0034576	N-isopropylacetanilide amidohydrolase activity		0.3531	0.5303	1	16	PARK7
GO: Molecular Function	GO:0018749	(3,5-dichlorophenylurea)acetate amidohydrolase activity		0.3531	0.5303	1	16	PARK7
GO: Molecular Function	GO:0046625	sphingolipid binding		0.3531	0.5303	1	16	LAMC1
GO: Molecular Function	GO:0034573	didemethylisoproturon amidohydrolase activity		0.3531	0.5303	1	16	PARK7
GO: Molecular Function	GO:0043864	indoleacetamide hydrolase activity		0.3531	0.5303	1	16	PARK7
GO: Molecular Function	GO:0052773	diacetylchitobiose deacetylase activity		0.3531	0.5303	1	16	PARK7
GO: Molecular Function	GO:0030169	low-density lipoprotein particle binding		0.3531	0.5303	1	16	THBS1
GO: Molecular Function	GO:0070628	proteasome binding		0.3531	0.5303	1	16	VCP
GO: Molecular Function	GO:0034882	cis-aconitamide amidase activity		0.3531	0.5303	1	16	PARK7
GO: Molecular Function	GO:0043909	N-acetylcitrulline deacetylase activity		0.3531	0.5303	1	16	PARK7
GO: Molecular Function	GO:0070405	ammonium ion binding		0.3565	0.5348	3	79	ACPP,APOA1,SERPINA5
GO: Molecular Function	GO:0004222	metalloendopeptidase activity		0.3604	0.5401	4	113	ADAM10,MME,MMP2,ADAMTS1
GO: Molecular Function	GO:0051018	protein kinase A binding		0.361	0.5403	2	47	EZR,PRKAR2A
GO: Molecular Function	GO:0030165	PDZ domain binding		0.3665	0.548	4	114	ARHGAP29,BAIAP2,F11R,TGFBR3
GO: Molecular Function	GO:0008574	ATP-dependent microtubule motor activity, plus-end-directed		0.3705	0.551	1	17	KIF5B
GO: Molecular Function	GO:0045236	CXCR chemokine receptor binding		0.3705	0.551	1	17	ITCH
GO: Molecular Function	GO:0038187	pattern recognition receptor activity		0.3705	0.551	1	17	CD14
GO: Molecular Function	GO:0048038	quinone binding		0.3705	0.551	1	17	AOC1
GO: Molecular Function	GO:0008329	signaling pattern recognition receptor activity		0.3705	0.551	1	17	CD14
GO: Molecular Function	GO:0000049	tRNA binding		0.3803	0.565	2	49	AARS,ALKBH8
GO: Molecular Function	GO:0032794	GTPase activating protein binding		0.3874	0.5695	1	18	CDH1
GO: Molecular Function	GO:0036041	long-chain fatty acid binding		0.3874	0.5695	1	18	RIDA
GO: Molecular Function	GO:0015248	sterol transporter activity		0.3874	0.5695	1	18	APOA1
GO: Molecular Function	GO:0098631	cell adhesion mediator activity		0.3874	0.5695	1	18	DSC2
GO: Molecular Function	GO:0005355	glucose transmembrane transporter activity		0.3874	0.5695	1	18	SLC2A5
GO: Molecular Function	GO:0008266	poly(U) RNA binding		0.3874	0.5695	1	18	MSI1
GO: Molecular Function	GO:0001671	ATPase activator activity		0.3874	0.5695	1	18	RAB3A
GO: Molecular Function	GO:0051766	inositol trisphosphate kinase activity		0.3874	0.5695	1	18	CALM1
GO: Molecular Function	GO:0050750	low-density lipoprotein particle receptor binding		0.3874	0.5695	1	18	HSP90B1
GO: Molecular Function	GO:0008409	5'-3' exonuclease activity		0.3874	0.5695	1	18	DIS3
GO: Molecular Function	GO:0032813	tumor necrosis factor receptor superfamily binding		0.3899	0.5725	2	50	ERAP1,TMBIM1
GO: Molecular Function	GO:0008320	protein transmembrane transporter activity		0.4039	0.5887	1	19	AZGP1
GO: Molecular Function	GO:0031434	mitogen-activated protein kinase kinase binding		0.4039	0.5887	1	19	ACE
GO: Molecular Function	GO:0016638	oxidoreductase activity, acting on the CH-NH2 group of donors		0.4039	0.5887	1	19	AOC1
GO: Molecular Function	GO:0035259	glucocorticoid receptor binding		0.4039	0.5887	1	19	YWHAH
GO: Molecular Function	GO:0043139	5'-3' DNA helicase activity		0.4039	0.5887	1	19	RUVBL1
GO: Molecular Function	GO:1990939	ATP-dependent microtubule motor activity		0.4039	0.5887	1	19	KIF5B
GO: Molecular Function	GO:0015149	hexose transmembrane transporter activity		0.4039	0.5887	1	19	SLC2A5
GO: Molecular Function	GO:0051117	ATPase binding		0.4148	0.6039	3	87	EZR,RUVBL1,RAB3A
GO: Molecular Function	GO:0019206	nucleoside kinase activity		0.4199	0.6088	1	20	CMPK1
GO: Molecular Function	GO:0005112	Notch binding		0.4199	0.6088	1	20	NOV
GO: Molecular Function	GO:0008656	cysteine-type endopeptidase activator activity involved in apoptotic process		0.4199	0.6088	1	20	CTSH
GO: Molecular Function	GO:0005149	interleukin-1 receptor binding		0.4199	0.6088	1	20	ERAP1
GO: Molecular Function	GO:0005179	hormone activity		0.4273	0.6186	4	124	CHGB,TTR,AGT,CARTPT
GO: Molecular Function	GO:0030374	ligand-dependent nuclear receptor transcription coactivator activity		0.4275	0.6186	2	54	TSG101,ACTN1
GO: Molecular Function	GO:0035258	steroid hormone receptor binding		0.4291	0.6203	3	89	PARK7,YWHAH,CALR
GO: Molecular Function	GO:0016780	phosphotransferase activity, for other substituted phosphate groups		0.4355	0.623	1	21	GNPTG
GO: Molecular Function	GO:0019956	chemokine binding		0.4355	0.623	1	21	A2M
GO: Molecular Function	GO:0030506	ankyrin binding		0.4355	0.623	1	21	CDH1
GO: Molecular Function	GO:0005123	death receptor binding		0.4355	0.623	1	21	TMBIM1
GO: Molecular Function	GO:0008373	sialyltransferase activity		0.4355	0.623	1	21	ST6GAL1
GO: Molecular Function	GO:0015145	monosaccharide transmembrane transporter activity		0.4355	0.623	1	21	SLC2A5
GO: Molecular Function	GO:0003964	RNA-directed DNA polymerase activity		0.4355	0.623	1	21	PTGES3
GO: Molecular Function	GO:0004896	cytokine receptor activity		0.4363	0.623	3	90	IL6ST,LIFR,IL1RL1
GO: Molecular Function	GO:0008135	translation factor activity, RNA binding		0.4363	0.623	3	90	EEF1G,EEF2,EIF5A
GO: Molecular Function	GO:0019199	transmembrane receptor protein kinase activity		0.4433	0.623	3	91	EFEMP1,IGF2R,TGFBR3
GO: Molecular Function	GO:0003714	transcription corepressor activity		0.4442	0.623	7	235	TSG101,BASP1,YWHAB,CRYM,PSMC3,CREG1,ENO1
GO: Molecular Function	GO:0008921	lipopolysaccharide-1,6-galactosyltransferase activity		0.4459	0.623	2	56	B4GALT5,B4GALT1
GO: Molecular Function	GO:0019112	phenanthrol glycosyltransferase activity		0.4459	0.623	2	56	B4GALT5,B4GALT1
GO: Molecular Function	GO:0018715	9-phenanthrol UDP-glucuronosyltransferase activity		0.4459	0.623	2	56	B4GALT5,B4GALT1
GO: Molecular Function	GO:0008755	O antigen polymerase activity		0.4459	0.623	2	56	B4GALT5,B4GALT1
GO: Molecular Function	GO:0031278	alpha-1,2-galactosyltransferase activity		0.4459	0.623	2	56	B4GALT5,B4GALT1
GO: Molecular Function	GO:0052641	benzoic acid glucosyltransferase activity		0.4459	0.623	2	56	B4GALT5,B4GALT1
GO: Molecular Function	GO:0018716	1-phenanthrol glycosyltransferase activity		0.4459	0.623	2	56	B4GALT5,B4GALT1
GO: Molecular Function	GO:0052824	dolichyl-pyrophosphate Man7GlcNAc2 alpha-1,6-mannosyltransferase activity		0.4459	0.623	2	56	B4GALT5,B4GALT1
GO: Molecular Function	GO:0016759	cellulose synthase activity		0.4459	0.623	2	56	B4GALT5,B4GALT1
GO: Molecular Function	GO:0080062	cytokinin 9-beta-glucosyltransferase activity		0.4459	0.623	2	56	B4GALT5,B4GALT1
GO: Molecular Function	GO:0035496	lipopolysaccharide-1,5-galactosyltransferase activity		0.4459	0.623	2	56	B4GALT5,B4GALT1
GO: Molecular Function	GO:0052757	chondroitin hydrolase activity		0.4459	0.623	2	56	B4GALT5,B4GALT1
GO: Molecular Function	GO:0018717	9-phenanthrol glycosyltransferase activity		0.4459	0.623	2	56	B4GALT5,B4GALT1
GO: Molecular Function	GO:0042283	dolichyl pyrophosphate Glc1Man9GlcNAc2 alpha-1,3-glucosyltransferase activity		0.4459	0.623	2	56	B4GALT5,B4GALT1
GO: Molecular Function	GO:0033556	dolichyl pyrophosphate Man7GlcNAc2 alpha-1,3-glucosyltransferase activity		0.4459	0.623	2	56	B4GALT5,B4GALT1
GO: Molecular Function	GO:0045140	inositol phosphoceramide synthase activity		0.4459	0.623	2	56	B4GALT5,B4GALT1
GO: Molecular Function	GO:0043621	protein self-association		0.4459	0.623	2	56	CTSB,CTSH
GO: Molecular Function	GO:0033931	endogalactosaminidase activity		0.4459	0.623	2	56	B4GALT5,B4GALT1
GO: Molecular Function	GO:0052640	salicylic acid glucosyltransferase (glucoside-forming) activity		0.4459	0.623	2	56	B4GALT5,B4GALT1
GO: Molecular Function	GO:0018718	1,2-dihydroxy-phenanthrene glycosyltransferase activity		0.4459	0.623	2	56	B4GALT5,B4GALT1
GO: Molecular Function	GO:0052638	indole-3-butyrate beta-glucosyltransferase activity		0.4459	0.623	2	56	B4GALT5,B4GALT1
GO: Molecular Function	GO:0052639	salicylic acid glucosyltransferase (ester-forming) activity		0.4459	0.623	2	56	B4GALT5,B4GALT1
GO: Molecular Function	GO:0004115	3',5'-cyclic-AMP phosphodiesterase activity		0.4507	0.624	1	22	SMPDL3A
GO: Molecular Function	GO:0022884	macromolecule transmembrane transporter activity		0.4507	0.624	1	22	AZGP1
GO: Molecular Function	GO:0030215	semaphorin receptor binding		0.4507	0.624	1	22	SEMA3C
GO: Molecular Function	GO:0030247	polysaccharide binding		0.4507	0.624	1	22	VTN
GO: Molecular Function	GO:0001871	pattern binding		0.4507	0.624	1	22	VTN
GO: Molecular Function	GO:0043274	phospholipase binding		0.4507	0.624	1	22	CALM1
GO: Molecular Function	GO:0051184	cofactor transmembrane transporter activity		0.4507	0.624	1	22	HPX
GO: Molecular Function	GO:0016849	phosphorus-oxygen lyase activity		0.4507	0.624	1	22	CD38
GO: Molecular Function	GO:0008187	poly-pyrimidine tract binding		0.4507	0.624	1	22	MSI1
GO: Molecular Function	GO:0000009	alpha-1,6-mannosyltransferase activity		0.4549	0.624	2	57	B4GALT5,B4GALT1
GO: Molecular Function	GO:0019187	beta-1,4-mannosyltransferase activity		0.4549	0.624	2	57	B4GALT5,B4GALT1
GO: Molecular Function	GO:0003980	UDP-glucose:glycoprotein glucosyltransferase activity		0.4549	0.624	2	57	B4GALT5,B4GALT1
GO: Molecular Function	GO:0046921	alpha-(1->6)-fucosyltransferase activity		0.4549	0.624	2	57	B4GALT5,B4GALT1
GO: Molecular Function	GO:0030554	adenyl nucleotide binding		0.4635	0.624	42	1530	AARS,HSP90B1,ACLY,STK32B,ACTB,ACTG2,PFN1,PGK1,CKB,UBA1,FBP1,PKM,ITM2B,HSPA1A,HSPA2,HSPA5,HSPA6,HSPA8,VCP,HSP90AA1,HSP90AB1,WARS,HYOU1,HSPA4L,CCT2,APRT,DHX30,RUVBL1,CCT5,PRKAR2A,ATP6V1A,CMPK1,MYO6,GARS,PSMC3,PSMC4,HSPA13,KIF5B,NME2,GSS,CCT6A,PEBP1
GO: Molecular Function	GO:0004376	glycolipid mannosyltransferase activity		0.4639	0.624	2	58	B4GALT5,B4GALT1
GO: Molecular Function	GO:0000026	alpha-1,2-mannosyltransferase activity		0.4639	0.624	2	58	B4GALT5,B4GALT1
GO: Molecular Function	GO:0042281	dolichyl pyrophosphate Man9GlcNAc2 alpha-1,3-glucosyltransferase activity		0.4639	0.624	2	58	B4GALT5,B4GALT1
GO: Molecular Function	GO:0001962	alpha-1,3-galactosyltransferase activity		0.4639	0.624	2	58	B4GALT5,B4GALT1
GO: Molecular Function	GO:0043713	(R)-2-hydroxyisocaproate dehydrogenase activity		0.4654	0.624	1	23	ADH5
GO: Molecular Function	GO:0046961	proton-transporting ATPase activity, rotational mechanism		0.4654	0.624	1	23	ATP6V1A
GO: Molecular Function	GO:0019152	acetoin dehydrogenase activity		0.4654	0.624	1	23	ADH5
GO: Molecular Function	GO:0044105	L-xylulose reductase (NAD+) activity		0.4654	0.624	1	23	ADH5
GO: Molecular Function	GO:0016505	peptidase activator activity involved in apoptotic process		0.4654	0.624	1	23	CTSH
GO: Molecular Function	GO:0004495	mevaldate reductase activity		0.4654	0.624	1	23	ADH5
GO: Molecular Function	GO:0008875	gluconate dehydrogenase activity		0.4654	0.624	1	23	ADH5
GO: Molecular Function	GO:0032867	L-arabinose:NADP reductase activity		0.4654	0.624	1	23	ADH5
GO: Molecular Function	GO:0033709	D-arabinitol dehydrogenase, D-ribulose forming (NADP+) activity		0.4654	0.624	1	23	ADH5
GO: Molecular Function	GO:0071889	14-3-3 protein binding		0.4654	0.624	1	23	YWHAQ
GO: Molecular Function	GO:0008483	transaminase activity		0.4654	0.624	1	23	GOT1
GO: Molecular Function	GO:0052677	D-arabinitol dehydrogenase, D-xylulose forming (NADP+) activity		0.4654	0.624	1	23	ADH5
GO: Molecular Function	GO:0018451	epoxide dehydrogenase activity		0.4654	0.624	1	23	ADH5
GO: Molecular Function	GO:0018453	2-hydroxytetrahydrofuran dehydrogenase activity		0.4654	0.624	1	23	ADH5
GO: Molecular Function	GO:0034831	(R)-(-)-1,2,3,4-tetrahydronaphthol dehydrogenase activity		0.4654	0.624	1	23	ADH5
GO: Molecular Function	GO:0044103	L-arabinose 1-dehydrogenase (NADP+) activity		0.4654	0.624	1	23	ADH5
GO: Molecular Function	GO:0031435	mitogen-activated protein kinase kinase kinase binding		0.4654	0.624	1	23	CDC42
GO: Molecular Function	GO:0018452	5-exo-hydroxycamphor dehydrogenase activity		0.4654	0.624	1	23	ADH5
GO: Molecular Function	GO:0048258	3-ketoglucose-reductase activity		0.4654	0.624	1	23	ADH5
GO: Molecular Function	GO:0032442	phenylcoumaran benzylic ether reductase activity		0.4654	0.624	1	23	ADH5
GO: Molecular Function	GO:0034840	3-hydroxymenthone dehydrogenase activity		0.4654	0.624	1	23	ADH5
GO: Molecular Function	GO:0000146	microfilament motor activity		0.4654	0.624	1	23	MYO6
GO: Molecular Function	GO:0032866	D-xylose:NADP reductase activity		0.4654	0.624	1	23	ADH5
GO: Molecular Function	GO:0035380	very long-chain-3-hydroxyacyl-CoA dehydrogenase activity		0.4654	0.624	1	23	ADH5
GO: Molecular Function	GO:0008270	zinc ion binding		0.4691	0.6283	33	1200	AARS,DDAH1,AOC1,MAN2A1,MAN2B1,ACR,ADAM10,ADH5,ALAD,ALB,MME,MMP2,ANPEP,ADAMTS1,CPD,CPE,CPZ,CPM,SMPD1,SOD1,SOD3,SORD,ERAP1,ACE,ALKBH8,SMPDL3A,GLO1,CA2,CA4,CALR,USP5,LMO2,LNPEP
GO: Molecular Function	GO:0000033	alpha-1,3-mannosyltransferase activity		0.4728	0.6326	2	59	B4GALT5,B4GALT1
GO: Molecular Function	GO:0016779	nucleotidyltransferase activity		0.4748	0.6347	4	132	UGP2,PTGES3,UAP1,NANS
GO: Molecular Function	GO:0004675	transmembrane receptor protein serine/threonine kinase activity		0.4798	0.6359	1	24	TGFBR3
GO: Molecular Function	GO:0019865	immunoglobulin binding		0.4798	0.6359	1	24	PIP
GO: Molecular Function	GO:0000252	C-3 sterol dehydrogenase (C-4 sterol decarboxylase) activity		0.4798	0.6359	1	24	ADH5
GO: Molecular Function	GO:0035410	dihydrotestosterone 17-beta-dehydrogenase activity		0.4798	0.6359	1	24	ADH5
GO: Molecular Function	GO:0017110	nucleoside-diphosphatase activity		0.4798	0.6359	1	24	CANT1
GO: Molecular Function	GO:0005086	ARF guanyl-nucleotide exchange factor activity		0.4798	0.6359	1	24	ARF4
GO: Molecular Function	GO:0015035	protein disulfide oxidoreductase activity		0.4798	0.6359	1	24	TXN
GO: Molecular Function	GO:0030351	inositol-1,3,4,5,6-pentakisphosphate 3-phosphatase activity		0.4798	0.6359	1	24	MINPP1
GO: Molecular Function	GO:0030352	inositol-1,4,5,6-tetrakisphosphate 6-phosphatase activity		0.4798	0.6359	1	24	MINPP1
GO: Molecular Function	GO:0004583	dolichyl-phosphate-glucose-glycolipid alpha-glucosyltransferase activity		0.4815	0.637	2	60	B4GALT5,B4GALT1
GO: Molecular Function	GO:0016628	oxidoreductase activity, acting on the CH-CH group of donors, NAD or NADP as acceptor		0.4815	0.637	2	60	FASN,BLVRB
GO: Molecular Function	GO:0019905	syntaxin binding		0.4919	0.6501	3	98	RAB11A,SYT7,SYTL1
GO: Molecular Function	GO:0044769	ATPase activity, coupled to transmembrane movement of ions, rotational mechanism		0.4938	0.6501	1	25	ATP6V1A
GO: Molecular Function	GO:0052827	inositol pentakisphosphate phosphatase activity		0.4938	0.6501	1	25	MINPP1
GO: Molecular Function	GO:0047617	acyl-CoA hydrolase activity		0.4938	0.6501	1	25	PARK7
GO: Molecular Function	GO:0043027	cysteine-type endopeptidase inhibitor activity involved in apoptotic process		0.4938	0.6501	1	25	PRDX5
GO: Molecular Function	GO:0019829	cation-transporting ATPase activity		0.4989	0.6555	2	62	ANXA5,ATP6V1A
GO: Molecular Function	GO:0005080	protein kinase C binding		0.4989	0.6555	2	62	HSPB1,YWHAG
GO: Molecular Function	GO:0019213	deacetylase activity		0.5074	0.6649	2	63	ESD,PARK7
GO: Molecular Function	GO:0015665	alcohol transmembrane transporter activity		0.5074	0.6649	1	26	SLC44A4
GO: Molecular Function	GO:0003785	actin monomer binding		0.5074	0.6649	1	26	PFN1
GO: Molecular Function	GO:0032559	adenyl ribonucleotide binding		0.5081	0.6651	41	1518	AARS,HSP90B1,ACLY,STK32B,ACTB,ACTG2,PGK1,CKB,UBA1,FBP1,PKM,ITM2B,HSPA1A,HSPA2,HSPA5,HSPA6,HSPA8,VCP,HSP90AA1,HSP90AB1,WARS,HYOU1,HSPA4L,CCT2,APRT,DHX30,RUVBL1,CCT5,PRKAR2A,ATP6V1A,CMPK1,MYO6,GARS,PSMC3,PSMC4,HSPA13,KIF5B,NME2,GSS,CCT6A,PEBP1
GO: Molecular Function	GO:0035251	UDP-glucosyltransferase activity		0.5158	0.6746	2	64	B4GALT5,B4GALT1
GO: Molecular Function	GO:0033765	steroid dehydrogenase activity, acting on the CH-CH group of donors		0.5206	0.679	1	27	ADH5
GO: Molecular Function	GO:0030552	cAMP binding		0.5206	0.679	1	27	PRKAR2A
GO: Molecular Function	GO:0016289	CoA hydrolase activity		0.5206	0.679	1	27	PARK7
GO: Molecular Function	GO:0035091	phosphatidylinositol binding		0.5286	0.6888	6	217	CFL1,PFN1,ANXA2,ZFYVE28,IQGAP1,SYT7
GO: Molecular Function	GO:0015631	tubulin binding		0.5309	0.69	8	293	ALDOA,MLPH,EZR,CCT5,GAPDH,RAB11A,B4GALT1,KIF5B
GO: Molecular Function	GO:0004576	oligosaccharyl transferase activity		0.5323	0.69	2	66	B4GALT5,B4GALT1
GO: Molecular Function	GO:0030276	clathrin binding		0.5323	0.69	2	66	SYT7,SYTL1
GO: Molecular Function	GO:0022835	transmitter-gated channel activity		0.5335	0.69	1	28	GLRA2
GO: Molecular Function	GO:0034987	immunoglobulin receptor binding		0.5335	0.69	1	28	IGLL5
GO: Molecular Function	GO:0001099	basal RNA polymerase II transcription machinery binding		0.5335	0.69	1	28	RUVBL1
GO: Molecular Function	GO:0001098	basal transcription machinery binding		0.5335	0.69	1	28	RUVBL1
GO: Molecular Function	GO:0022824	transmitter-gated ion channel activity		0.5335	0.69	1	28	GLRA2
GO: Molecular Function	GO:0004714	transmembrane receptor protein tyrosine kinase activity		0.5405	0.6983	2	67	EFEMP1,IGF2R
GO: Molecular Function	GO:0046875	ephrin receptor binding		0.5461	0.703	1	29	SDCBP
GO: Molecular Function	GO:0008519	ammonium transmembrane transporter activity		0.5461	0.703	1	29	SLC44A4
GO: Molecular Function	GO:0043014	alpha-tubulin binding		0.5461	0.703	1	29	B4GALT1
GO: Molecular Function	GO:0036442	proton-exporting ATPase activity		0.5461	0.703	1	29	ATP6V1A
GO: Molecular Function	GO:0004722	protein serine/threonine phosphatase activity		0.5485	0.7054	2	68	PPP1CB,PPP2R1A
GO: Molecular Function	GO:0016627	oxidoreductase activity, acting on the CH-CH group of donors		0.551	0.708	3	107	ADH5,FASN,BLVRB
GO: Molecular Function	GO:0000175	3'-5'-exoribonuclease activity		0.5583	0.7147	1	30	DIS3
GO: Molecular Function	GO:0043425	bHLH transcription factor binding		0.5583	0.7147	1	30	LMO2
GO: Molecular Function	GO:0031492	nucleosomal DNA binding		0.5583	0.7147	1	30	ACTB
GO: Molecular Function	GO:0004114	3',5'-cyclic-nucleotide phosphodiesterase activity		0.5583	0.7147	1	30	SMPDL3A
GO: Molecular Function	GO:0008022	protein C-terminus binding		0.5597	0.7159	6	224	BAIAP2,SDCBP,YWHAB,YWHAQ,RAB3A,ECM1
GO: Molecular Function	GO:0016418	S-acetyltransferase activity		0.5702	0.72	1	31	FASN
GO: Molecular Function	GO:0004112	cyclic-nucleotide phosphodiesterase activity		0.5702	0.72	1	31	SMPDL3A
GO: Molecular Function	GO:0016896	exoribonuclease activity, producing 5'-phosphomonoesters		0.5702	0.72	1	31	DIS3
GO: Molecular Function	GO:0016419	S-malonyltransferase activity		0.5702	0.72	1	31	FASN
GO: Molecular Function	GO:0018602	2,4-dichlorophenoxyacetate alpha-ketoglutarate dioxygenase activity		0.5702	0.72	1	31	ALKBH8
GO: Molecular Function	GO:0052634	C-19 gibberellin 2-beta-dioxygenase activity		0.5702	0.72	1	31	ALKBH8
GO: Molecular Function	GO:0000907	sulfonate dioxygenase activity		0.5702	0.72	1	31	ALKBH8
GO: Molecular Function	GO:0016420	malonyltransferase activity		0.5702	0.72	1	31	FASN
GO: Molecular Function	GO:0052770	coenzyme F390-A hydrolase activity		0.5702	0.72	1	31	HINT3
GO: Molecular Function	GO:0061631	ubiquitin conjugating enzyme activity		0.5702	0.72	1	31	UBE2V2
GO: Molecular Function	GO:0052635	C-20 gibberellin 2-beta-dioxygenase activity		0.5702	0.72	1	31	ALKBH8
GO: Molecular Function	GO:0052771	coenzyme F390-G hydrolase activity		0.5702	0.72	1	31	HINT3
GO: Molecular Function	GO:0045543	gibberellin 2-beta-dioxygenase activity		0.5702	0.72	1	31	ALKBH8
GO: Molecular Function	GO:0034792	hypophosphite dioxygenase activity		0.5702	0.72	1	31	ALKBH8
GO: Molecular Function	GO:0060589	nucleoside-triphosphatase regulator activity		0.5786	0.7292	9	344	A2M,PFN1,ARHGAP29,ALDH1A1,GDI2,IQGAP1,RAB3A,ARHGEF12,AGRN
GO: Molecular Function	GO:0002039	p53 binding		0.5796	0.7292	2	72	PTGES3,EEF2
GO: Molecular Function	GO:0032266	phosphatidylinositol-3-phosphate binding		0.5817	0.7292	1	32	ZFYVE28
GO: Molecular Function	GO:0030507	spectrin binding		0.5817	0.7292	1	32	GNB1
GO: Molecular Function	GO:0042605	peptide antigen binding		0.5817	0.7292	1	32	AZGP1
GO: Molecular Function	GO:0004623	phospholipase A2 activity		0.5817	0.7292	1	32	PLA2G2A
GO: Molecular Function	GO:0043734	DNA-N1-methyladenine dioxygenase activity		0.5817	0.7292	1	32	ALKBH8
GO: Molecular Function	GO:0061650	ubiquitin-like protein conjugating enzyme activity		0.5817	0.7292	1	32	UBE2V2
GO: Molecular Function	GO:0005184	neuropeptide hormone activity		0.593	0.7407	1	33	CARTPT
GO: Molecular Function	GO:0000062	fatty-acyl-CoA binding		0.593	0.7407	1	33	DBI
GO: Molecular Function	GO:0005164	tumor necrosis factor receptor binding		0.593	0.7407	1	33	ERAP1
GO: Molecular Function	GO:0051119	sugar transmembrane transporter activity		0.593	0.7407	1	33	SLC2A5
GO: Molecular Function	GO:0000030	mannosyltransferase activity		0.5946	0.7413	2	74	B4GALT5,B4GALT1
GO: Molecular Function	GO:0042625	ATPase coupled ion transmembrane transporter activity		0.5946	0.7413	2	74	ANXA5,ATP6V1A
GO: Molecular Function	GO:0008376	acetylgalactosaminyltransferase activity		0.6019	0.7491	2	75	B4GALT5,B4GALT1
GO: Molecular Function	GO:0004843	thiol-dependent ubiquitin-specific protease activity		0.6019	0.7491	2	75	UCHL3,USP5
GO: Molecular Function	GO:0005158	insulin receptor binding		0.6039	0.7496	1	34	PTPRF
GO: Molecular Function	GO:0052743	inositol tetrakisphosphate phosphatase activity		0.6039	0.7496	1	34	MINPP1
GO: Molecular Function	GO:0042169	SH2 domain binding		0.6039	0.7496	1	34	ADAM10
GO: Molecular Function	GO:0070888	E-box binding		0.6146	0.7601	1	35	LMO2
GO: Molecular Function	GO:0051721	protein phosphatase 2A binding		0.6146	0.7601	1	35	CPD
GO: Molecular Function	GO:0017069	snRNA binding		0.6146	0.7601	1	35	EIF5A
GO: Molecular Function	GO:0003923	GPI-anchor transamidase activity		0.6146	0.7601	1	35	HINT3
GO: Molecular Function	GO:0005319	lipid transporter activity		0.6175	0.7631	3	118	APOA1,APOD,GM2A
GO: Molecular Function	GO:0051879	Hsp90 protein binding		0.6249	0.7702	1	36	PTGES3
GO: Molecular Function	GO:0004532	exoribonuclease activity		0.6249	0.7702	1	36	DIS3
GO: Molecular Function	GO:0044390	ubiquitin-like protein conjugating enzyme binding		0.6249	0.7702	1	36	PARK7
GO: Molecular Function	GO:0005524	ATP binding		0.6303	0.7762	38	1475	AARS,HSP90B1,ACLY,STK32B,ACTB,ACTG2,PGK1,CKB,UBA1,PKM,ITM2B,HSPA1A,HSPA2,HSPA5,HSPA6,HSPA8,VCP,HSP90AA1,HSP90AB1,WARS,HYOU1,HSPA4L,CCT2,DHX30,RUVBL1,CCT5,ATP6V1A,CMPK1,MYO6,GARS,PSMC3,PSMC4,HSPA13,KIF5B,NME2,GSS,CCT6A,PEBP1
GO: Molecular Function	GO:0016891	endoribonuclease activity, producing 5'-phosphomonoesters		0.635	0.7806	1	37	DIS3
GO: Molecular Function	GO:0070063	RNA polymerase binding		0.635	0.7806	1	37	PPIB
GO: Molecular Function	GO:0005089	Rho guanyl-nucleotide exchange factor activity		0.637	0.7824	2	80	DOCK9,ARHGEF12
GO: Molecular Function	GO:0003727	single-stranded RNA binding		0.6438	0.7885	2	81	ANXA1,MSI1
GO: Molecular Function	GO:0005254	chloride channel activity		0.6438	0.7885	2	81	CLIC1,GLRA2
GO: Molecular Function	GO:0004864	protein phosphatase inhibitor activity		0.6448	0.7885	1	38	PTN
GO: Molecular Function	GO:0043548	phosphatidylinositol 3-kinase binding		0.6448	0.7885	1	38	CALM1
GO: Molecular Function	GO:0001102	RNA polymerase II activating transcription factor binding		0.6448	0.7885	1	38	LMO2
GO: Molecular Function	GO:0017124	SH3 domain binding		0.6454	0.7885	3	123	ADAM10,MVB12A,PDCD6IP
GO: Molecular Function	GO:0015662	ATPase activity, coupled to transmembrane movement of ions, phosphorylative mechanism		0.6637	0.8087	1	40	ANXA5
GO: Molecular Function	GO:0005547	phosphatidylinositol-3,4,5-trisphosphate binding		0.6637	0.8087	1	40	IQGAP1
GO: Molecular Function	GO:0016877	ligase activity, forming carbon-sulfur bonds		0.6637	0.8087	1	40	UBA1
GO: Molecular Function	GO:0008307	structural constituent of muscle		0.6727	0.8161	1	41	MYL6
GO: Molecular Function	GO:0019212	phosphatase inhibitor activity		0.6727	0.8161	1	41	PTN
GO: Molecular Function	GO:0051539	4 iron, 4 sulfur cluster binding		0.6727	0.8161	1	41	ACO1
GO: Molecular Function	GO:0030551	cyclic nucleotide binding		0.6727	0.8161	1	41	PRKAR2A
GO: Molecular Function	GO:0033764	steroid dehydrogenase activity, acting on the CH-OH group of donors, NAD or NADP as acceptor		0.6727	0.8161	1	41	ADH5
GO: Molecular Function	GO:0017137	Rab GTPase binding		0.677	0.8206	3	129	MLPH,ANXA2,SYTL1
GO: Molecular Function	GO:0015026	coreceptor activity		0.6815	0.8246	1	42	TGFBR3
GO: Molecular Function	GO:0046915	transition metal ion transmembrane transporter activity		0.6815	0.8246	1	42	TF
GO: Molecular Function	GO:0008017	microtubule binding		0.6843	0.8273	5	214	MLPH,EZR,GAPDH,RAB11A,KIF5B
GO: Molecular Function	GO:0015020	glucuronosyltransferase activity		0.6882	0.8312	2	88	B4GALT5,B4GALT1
GO: Molecular Function	GO:0003774	motor activity		0.692	0.8351	3	132	MYL6,MYO6,KIF5B
GO: Molecular Function	GO:0008013	beta-catenin binding		0.6941	0.8369	2	89	VCL,CDH1
GO: Molecular Function	GO:0016705	oxidoreductase activity, acting on paired donors, with incorporation or reduction of molecular oxygen		0.6949	0.8372	4	175	PLOD1,ALKBH8,PLOD3,P4HB
GO: Molecular Function	GO:0005245	voltage-gated calcium channel activity		0.6985	0.84	1	44	CACNA2D1
GO: Molecular Function	GO:0016408	C-acyltransferase activity		0.6985	0.84	1	44	ACAT2
GO: Molecular Function	GO:0000149	SNARE binding		0.7017	0.8431	3	134	RAB11A,SYT7,SYTL1
GO: Molecular Function	GO:0008134	transcription factor binding		0.7054	0.8461	14	584	PARK7,ACTB,HSPA1A,HSPA8,ANXA4,YWHAZ,RUVBL1,CAND1,PSMA6,PSMC3,PSMC4,CREG1,GPX3,LMO2
GO: Molecular Function	GO:0015144	carbohydrate transmembrane transporter activity		0.7066	0.8461	1	45	SLC2A5
GO: Molecular Function	GO:0031491	nucleosome binding		0.7066	0.8461	1	45	ACTB
GO: Molecular Function	GO:0017046	peptide hormone binding		0.7066	0.8461	1	45	ANXA5
GO: Molecular Function	GO:0015108	chloride transmembrane transporter activity		0.7114	0.8507	2	92	CLIC1,GLRA2
GO: Molecular Function	GO:0003729	mRNA binding		0.7117	0.8507	4	179	ACO1,PARK7,HSP90AA1,CALR
GO: Molecular Function	GO:0016229	steroid dehydrogenase activity		0.7145	0.8518	1	46	ADH5
GO: Molecular Function	GO:0031593	polyubiquitin modification-dependent protein binding		0.7145	0.8518	1	46	VCP
GO: Molecular Function	GO:0035254	glutamate receptor binding		0.7145	0.8518	1	46	CALM1
GO: Molecular Function	GO:0005253	anion channel activity		0.717	0.8534	2	93	CLIC1,GLRA2
GO: Molecular Function	GO:0008094	DNA-dependent ATPase activity		0.717	0.8534	2	93	ANXA1,RUVBL1
GO: Molecular Function	GO:0060090	molecular adaptor activity		0.7198	0.856	4	181	BAIAP2,SDCBP,ANXA1,PDCD6
GO: Molecular Function	GO:0004003	ATP-dependent DNA helicase activity		0.7222	0.8563	1	47	RUVBL1
GO: Molecular Function	GO:0034061	DNA polymerase activity		0.7222	0.8563	1	47	PTGES3
GO: Molecular Function	GO:0016893	endonuclease activity, active with either ribo- or deoxyribonucleic acids and producing 5'-phosphomonoesters		0.7222	0.8563	1	47	DIS3
GO: Molecular Function	GO:0004520	endodeoxyribonuclease activity		0.7225	0.8563	2	94	RIDA,DNASE2
GO: Molecular Function	GO:0015459	potassium channel regulator activity		0.7296	0.8632	1	48	YWHAE
GO: Molecular Function	GO:0016796	exonuclease activity, active with either ribo- or deoxyribonucleic acids and producing 5'-phosphomonoesters		0.7296	0.8632	1	48	DIS3
GO: Molecular Function	GO:0019825	oxygen binding		0.7509	0.8876	1	51	ALB
GO: Molecular Function	GO:0008408	3'-5' exonuclease activity		0.7576	0.8948	1	52	DIS3
GO: Molecular Function	GO:0004721	phosphoprotein phosphatase activity		0.7613	0.8985	4	192	PPP1CB,PPP2R1A,PTPRF,PTPRS
GO: Molecular Function	GO:0016651	oxidoreductase activity, acting on NAD(P)H		0.768	0.9039	2	103	TXNDC17,CBR1
GO: Molecular Function	GO:0004725	protein tyrosine phosphatase activity		0.768	0.9039	2	103	PTPRF,PTPRS
GO: Molecular Function	GO:0005548	phospholipid transporter activity		0.7705	0.9039	1	54	APOA1
GO: Molecular Function	GO:0044824	retroviral 3' processing activity		0.7705	0.9039	1	54	RIDA
GO: Molecular Function	GO:0043765	T/G mismatch-specific endonuclease activity		0.7705	0.9039	1	54	RIDA
GO: Molecular Function	GO:0008907	integrase activity		0.7705	0.9039	1	54	RIDA
GO: Molecular Function	GO:0044823	retroviral integrase activity		0.7705	0.9039	1	54	RIDA
GO: Molecular Function	GO:0003697	single-stranded DNA binding		0.7726	0.9056	2	104	PARK7,ANXA1
GO: Molecular Function	GO:0005096	GTPase activator activity		0.7749	0.9076	6	283	A2M,ARHGAP29,ALDH1A1,GDI2,IQGAP1,ARHGEF12
GO: Molecular Function	GO:0097110	scaffold protein binding		0.7766	0.9088	1	55	PARK7
GO: Molecular Function	GO:0005231	excitatory extracellular ligand-gated ion channel activity		0.7827	0.9151	1	56	GLRA2
GO: Molecular Function	GO:0016417	S-acyltransferase activity		0.7885	0.9211	1	57	FASN
GO: Molecular Function	GO:0036459	thiol-dependent ubiquitinyl hydrolase activity		0.7903	0.9217	2	108	UCHL3,USP5
GO: Molecular Function	GO:0101005	ubiquitinyl hydrolase activity		0.7903	0.9217	2	108	UCHL3,USP5
GO: Molecular Function	GO:0004536	deoxyribonuclease activity		0.7946	0.9259	2	109	RIDA,DNASE2
GO: Molecular Function	GO:0042626	ATPase activity, coupled to transmembrane movement of substances		0.7987	0.9296	2	110	ANXA5,ATP6V1A
GO: Molecular Function	GO:0098811	transcriptional repressor activity, RNA polymerase II activating transcription factor binding		0.7997	0.9296	1	59	LMO2
GO: Molecular Function	GO:0001190	transcriptional activator activity, RNA polymerase II transcription factor binding		0.7997	0.9296	1	59	LMO2
GO: Molecular Function	GO:0042379	chemokine receptor binding		0.8051	0.9335	1	60	ITCH
GO: Molecular Function	GO:0016655	oxidoreductase activity, acting on NAD(P)H, quinone or similar compound as acceptor		0.8051	0.9335	1	60	CBR1
GO: Molecular Function	GO:0070491	repressing transcription factor binding		0.8051	0.9335	1	60	PARK7
GO: Molecular Function	GO:0008026	ATP-dependent helicase activity		0.8068	0.9339	2	112	DHX30,RUVBL1
GO: Molecular Function	GO:0070035	purine NTP-dependent helicase activity		0.8068	0.9339	2	112	DHX30,RUVBL1
GO: Molecular Function	GO:0033613	activating transcription factor binding		0.8104	0.9367	1	61	LMO2
GO: Molecular Function	GO:0035257	nuclear hormone receptor binding		0.8106	0.9367	3	161	PARK7,YWHAH,CALR
GO: Molecular Function	GO:1901618	organic hydroxy compound transmembrane transporter activity		0.8155	0.9415	1	62	SLC44A4
GO: Molecular Function	GO:0005198	structural molecule activity		0.8161	0.9415	17	762	RPLP1,ACTB,TUBB4A,UBA52,FBLN2,VCL,COL12A1,ANXA1,VPS25,MUC6,MYL6,TUBA1C,LAMA5,LAMB2,LAMC1,COL18A1,AGRN
GO: Molecular Function	GO:0030674	protein binding, bridging		0.8171	0.9419	3	163	BAIAP2,SDCBP,ANXA1
GO: Molecular Function	GO:0016746	transferase activity, transferring acyl groups		0.8233	0.9482	5	257	ACAT2,ACLY,FASN,GGT1,TGM4
GO: Molecular Function	GO:0051540	metal cluster binding		0.8253	0.949	1	64	ACO1
GO: Molecular Function	GO:0051536	iron-sulfur cluster binding		0.8253	0.949	1	64	ACO1
GO: Molecular Function	GO:0001085	RNA polymerase II transcription factor binding		0.8294	0.9528	2	118	RUVBL1,LMO2
GO: Molecular Function	GO:0003678	DNA helicase activity		0.83	0.9528	1	65	RUVBL1
GO: Molecular Function	GO:0015399	primary active transmembrane transporter activity		0.8329	0.9538	2	119	ANXA5,ATP6V1A
GO: Molecular Function	GO:0019783	ubiquitin-like protein-specific protease activity		0.8329	0.9538	2	119	UCHL3,USP5
GO: Molecular Function	GO:0015405	P-P-bond-hydrolysis-driven transmembrane transporter activity		0.8329	0.9538	2	119	ANXA5,ATP6V1A
GO: Molecular Function	GO:0008186	RNA-dependent ATPase activity		0.8346	0.9541	1	66	DHX30
GO: Molecular Function	GO:0004004	ATP-dependent RNA helicase activity		0.8346	0.9541	1	66	DHX30
GO: Molecular Function	GO:0004386	helicase activity		0.8442	0.9643	3	172	ANXA1,DHX30,RUVBL1
GO: Molecular Function	GO:0016407	acetyltransferase activity		0.8464	0.9656	2	123	ACAT2,FASN
GO: Molecular Function	GO:0030695	GTPase regulator activity		0.8467	0.9656	6	312	A2M,ARHGAP29,ALDH1A1,GDI2,IQGAP1,ARHGEF12
GO: Molecular Function	GO:0030594	neurotransmitter receptor activity		0.8476	0.9658	1	69	GLRA2
GO: Molecular Function	GO:0043492	ATPase activity, coupled to movement of substances		0.8527	0.9668	2	125	ANXA5,ATP6V1A
GO: Molecular Function	GO:0000980	RNA polymerase II distal enhancer sequence-specific DNA binding		0.8557	0.9668	1	71	ACTB
GO: Molecular Function	GO:0004713	protein tyrosine kinase activity		0.8702	0.9668	3	182	EFEMP1,HSP90AA1,IGF2R
GO: Molecular Function	GO:0020037	heme binding		0.8704	0.9668	2	131	HPX,PRDX1
GO: Molecular Function	GO:0003724	RNA helicase activity		0.8706	0.9668	1	75	DHX30
GO: Molecular Function	GO:0051427	hormone receptor binding		0.8726	0.9668	3	183	PARK7,YWHAH,CALR
GO: Molecular Function	GO:0015085	calcium ion transmembrane transporter activity		0.8731	0.9668	2	132	ANXA5,CACNA2D1
GO: Molecular Function	GO:0015103	inorganic anion transmembrane transporter activity		0.8731	0.9668	2	132	CLIC1,GLRA2
GO: Molecular Function	GO:0005230	extracellular ligand-gated ion channel activity		0.8741	0.9668	1	76	GLRA2
GO: Molecular Function	GO:0046332	SMAD binding		0.8775	0.9668	1	77	TGFBR3
GO: Molecular Function	GO:0003777	microtubule motor activity		0.8775	0.9668	1	77	KIF5B
GO: Molecular Function	GO:0034933	1-hydroxy-6-methoxypyrene methyltransferase activity		0.884	0.9668	1	79	ALKBH8
GO: Molecular Function	GO:0051994	P-methyltransferase activity		0.884	0.9668	1	79	ALKBH8
GO: Molecular Function	GO:0043852	monomethylamine methyltransferase activity		0.884	0.9668	1	79	ALKBH8
GO: Molecular Function	GO:0052665	tRNA (uracil-2'-O-)-methyltransferase activity		0.884	0.9668	1	79	ALKBH8
GO: Molecular Function	GO:0034807	4,5-dihydroxybenzo(a)pyrene methyltransferase activity		0.884	0.9668	1	79	ALKBH8
GO: Molecular Function	GO:0034931	1-hydroxypyrene methyltransferase activity		0.884	0.9668	1	79	ALKBH8
GO: Molecular Function	GO:0043777	cobalt-precorrin-7 C15-methyltransferase activity		0.884	0.9668	1	79	ALKBH8
GO: Molecular Function	GO:0080012	trihydroxyferuloyl spermidine O-methyltransferase activity		0.884	0.9668	1	79	ALKBH8
GO: Molecular Function	GO:0019702	protein-arginine N5-methyltransferase activity		0.884	0.9668	1	79	ALKBH8
GO: Molecular Function	GO:0043851	methanol-specific methylcobalamin:coenzyme M methyltransferase activity		0.884	0.9668	1	79	ALKBH8
GO: Molecular Function	GO:0043834	trimethylamine methyltransferase activity		0.884	0.9668	1	79	ALKBH8
GO: Molecular Function	GO:0016205	selenocysteine methyltransferase activity		0.884	0.9668	1	79	ALKBH8
GO: Molecular Function	GO:0043782	cobalt-precorrin-3 C17-methyltransferase activity		0.884	0.9668	1	79	ALKBH8
GO: Molecular Function	GO:0052735	tRNA (cytosine-3-)-methyltransferase activity		0.884	0.9668	1	79	ALKBH8
GO: Molecular Function	GO:0043791	dimethylamine methyltransferase activity		0.884	0.9668	1	79	ALKBH8
GO: Molecular Function	GO:0043770	demethylmenaquinone methyltransferase activity		0.884	0.9668	1	79	ALKBH8
GO: Molecular Function	GO:0008650	rRNA (uridine-2'-O-)-methyltransferase activity		0.884	0.9668	1	79	ALKBH8
GO: Molecular Function	GO:0034541	dimethylarsinite methyltransferase activity		0.884	0.9668	1	79	ALKBH8
GO: Molecular Function	GO:0043776	cobalt-precorrin-6B C5-methyltransferase activity		0.884	0.9668	1	79	ALKBH8
GO: Molecular Function	GO:0018707	1-phenanthrol methyltransferase activity		0.884	0.9668	1	79	ALKBH8
GO: Molecular Function	GO:0043827	tRNA (adenine-57, 58-N(1)-) methyltransferase activity		0.884	0.9668	1	79	ALKBH8
GO: Molecular Function	GO:0052667	phosphomethylethanolamine N-methyltransferase activity		0.884	0.9668	1	79	ALKBH8
GO: Molecular Function	GO:0043803	hydroxyneurosporene-O-methyltransferase activity		0.884	0.9668	1	79	ALKBH8
GO: Molecular Function	GO:0043780	cobalt-precorrin-5B C1-methyltransferase activity		0.884	0.9668	1	79	ALKBH8
GO: Molecular Function	GO:0051995	Se-methyltransferase activity		0.884	0.9668	1	79	ALKBH8
GO: Molecular Function	GO:0052666	tRNA (cytosine-2'-O-)-methyltransferase activity		0.884	0.9668	1	79	ALKBH8
GO: Molecular Function	GO:0070677	rRNA (cytosine-2'-O-)-methyltransferase activity		0.884	0.9668	1	79	ALKBH8
GO: Molecular Function	GO:0009383	rRNA (cytosine-C5-)-methyltransferase activity		0.884	0.9668	1	79	ALKBH8
GO: Molecular Function	GO:0052624	2-phytyl-1,4-naphthoquinone methyltransferase activity		0.884	0.9668	1	79	ALKBH8
GO: Molecular Function	GO:0043833	methylamine-specific methylcobalamin:coenzyme M methyltransferase activity		0.884	0.9668	1	79	ALKBH8
GO: Molecular Function	GO:0016435	rRNA (guanine) methyltransferase activity		0.884	0.9668	1	79	ALKBH8
GO: Molecular Function	GO:0008988	rRNA (adenine-N6-)-methyltransferase activity		0.884	0.9668	1	79	ALKBH8
GO: Molecular Function	GO:0016436	rRNA (uridine) methyltransferase activity		0.8872	0.9668	1	80	ALKBH8
GO: Molecular Function	GO:0009019	tRNA (guanine-N1-)-methyltransferase activity		0.8872	0.9668	1	80	ALKBH8
GO: Molecular Function	GO:0030792	methylarsonite methyltransferase activity		0.8872	0.9668	1	80	ALKBH8
GO: Molecular Function	GO:0018423	protein C-terminal leucine carboxyl O-methyltransferase activity		0.8872	0.9668	1	80	ALKBH8
GO: Molecular Function	GO:0004809	tRNA (guanine-N2-)-methyltransferase activity		0.8872	0.9668	1	80	ALKBH8
GO: Molecular Function	GO:0000179	rRNA (adenine-N6,N6-)-dimethyltransferase activity		0.8872	0.9668	1	80	ALKBH8
GO: Molecular Function	GO:0016434	rRNA (cytosine) methyltransferase activity		0.8872	0.9668	1	80	ALKBH8
GO: Molecular Function	GO:0071424	rRNA (cytosine-N4-)-methyltransferase activity		0.8872	0.9668	1	80	ALKBH8
GO: Molecular Function	GO:0016433	rRNA (adenine) methyltransferase activity		0.8872	0.9668	1	80	ALKBH8
GO: Molecular Function	GO:0005516	calmodulin binding		0.8882	0.9668	3	190	MYO6,IQGAP1,SYT7
GO: Molecular Function	GO:0016428	tRNA (cytosine-5-)-methyltransferase activity		0.8902	0.9668	1	81	ALKBH8
GO: Molecular Function	GO:0008425	2-polyprenyl-6-methoxy-1,4-benzoquinone methyltransferase activity		0.8902	0.9668	1	81	ALKBH8
GO: Molecular Function	GO:0016429	tRNA (adenine-N1-)-methyltransferase activity		0.8902	0.9668	1	81	ALKBH8
GO: Molecular Function	GO:0008169	C-methyltransferase activity		0.8902	0.9668	1	81	ALKBH8
GO: Molecular Function	GO:0030580	quinone cofactor methyltransferase activity		0.8902	0.9668	1	81	ALKBH8
GO: Molecular Function	GO:0016426	tRNA (adenine) methyltransferase activity		0.8902	0.9668	1	81	ALKBH8
GO: Molecular Function	GO:0016300	tRNA (uracil) methyltransferase activity		0.8902	0.9668	1	81	ALKBH8
GO: Molecular Function	GO:0003880	protein C-terminal carboxyl O-methyltransferase activity		0.8932	0.967	1	82	ALKBH8
GO: Molecular Function	GO:0004527	exonuclease activity		0.8932	0.967	1	82	DIS3
GO: Molecular Function	GO:0016427	tRNA (cytosine) methyltransferase activity		0.8932	0.967	1	82	ALKBH8
GO: Molecular Function	GO:0046906	tetrapyrrole binding		0.8932	0.967	2	140	HPX,PRDX1
GO: Molecular Function	GO:0008649	rRNA methyltransferase activity		0.896	0.9693	1	83	ALKBH8
GO: Molecular Function	GO:0009008	DNA-methyltransferase activity		0.8989	0.9701	1	84	ALKBH8
GO: Molecular Function	GO:0008174	mRNA methyltransferase activity		0.8989	0.9701	1	84	ALKBH8
GO: Molecular Function	GO:0016423	tRNA (guanine) methyltransferase activity		0.8989	0.9701	1	84	ALKBH8
GO: Molecular Function	GO:0010340	carboxyl-O-methyltransferase activity		0.9016	0.9708	1	85	ALKBH8
GO: Molecular Function	GO:0051998	protein carboxyl O-methyltransferase activity		0.9016	0.9708	1	85	ALKBH8
GO: Molecular Function	GO:0031490	chromatin DNA binding		0.9016	0.9708	1	85	ACTB
GO: Molecular Function	GO:0046982	protein heterodimerization activity		0.9034	0.9714	11	571	HEXA,HEXB,TTR,SDCBP,YWHAE,YWHAH,PPP2R1A,IL6ST,LIFR,P4HB,ENO1
GO: Molecular Function	GO:0016273	arginine N-methyltransferase activity		0.9042	0.9714	1	86	ALKBH8
GO: Molecular Function	GO:0016274	protein-arginine N-methyltransferase activity		0.9042	0.9714	1	86	ALKBH8
GO: Molecular Function	GO:0008172	S-methyltransferase activity		0.9068	0.9734	1	87	ALKBH8
GO: Molecular Function	GO:0022834	ligand-gated channel activity		0.9103	0.9756	2	148	GLRA2,CALM1
GO: Molecular Function	GO:0015276	ligand-gated ion channel activity		0.9103	0.9756	2	148	GLRA2,CALM1
GO: Molecular Function	GO:0005085	guanyl-nucleotide exchange factor activity		0.9167	0.9817	5	306	DIS3,ARF4,CALM1,DOCK9,ARHGEF12
GO: Molecular Function	GO:0008171	O-methyltransferase activity		0.9209	0.984	1	93	ALKBH8
GO: Molecular Function	GO:0001191	transcriptional repressor activity, RNA polymerase II transcription factor binding		0.9209	0.984	1	93	LMO2
GO: Molecular Function	GO:0001158	enhancer sequence-specific DNA binding		0.9209	0.984	1	93	ACTB
GO: Molecular Function	GO:0008175	tRNA methyltransferase activity		0.9231	0.9855	1	94	ALKBH8
GO: Molecular Function	GO:0061630	ubiquitin protein ligase activity		0.9266	0.9885	3	212	UBE2V2,ITCH,CDC42
GO: Molecular Function	GO:0061659	ubiquitin-like protein ligase activity		0.9335	0.9951	3	217	UBE2V2,ITCH,CDC42
GO: Molecular Function	GO:0008565	protein transporter activity		0.9365	0.9975	1	101	AZGP1
GO: Molecular Function	GO:0008173	RNA methyltransferase activity		0.9415	1	1	104	ALKBH8
GO: Molecular Function	GO:0035326	enhancer binding		0.9446	1	1	106	ACTB
GO: Molecular Function	GO:0072509	divalent inorganic cation transmembrane transporter activity		0.9487	1	2	173	ANXA5,CACNA2D1
GO: Molecular Function	GO:0015078	proton transmembrane transporter activity		0.949	1	1	109	ATP6V1A
GO: Molecular Function	GO:0005088	Ras guanyl-nucleotide exchange factor activity		0.9506	1	3	232	CALM1,DOCK9,ARHGEF12
GO: Molecular Function	GO:0022853	active ion transmembrane transporter activity		0.9509	1	2	175	ANXA5,ATP6V1A
GO: Molecular Function	GO:0005262	calcium channel activity		0.9555	1	1	114	CACNA2D1
GO: Molecular Function	GO:0001078	transcriptional repressor activity, RNA polymerase II proximal promoter sequence-specific DNA binding		0.9555	1	1	114	PROX2
GO: Molecular Function	GO:0005057	signal transducer activity, downstream of receptor		0.9618	1	2	186	KLK3,IL1RL1
GO: Molecular Function	GO:0016279	protein-lysine N-methyltransferase activity		0.9642	1	1	122	ALKBH8
GO: Molecular Function	GO:0016278	lysine N-methyltransferase activity		0.9652	1	1	123	ALKBH8
GO: Molecular Function	GO:0000989	transcription factor activity, transcription factor binding		0.968	1	10	610	PARK7,TSG101,ACTN1,BASP1,YWHAB,CRYM,PSMC3,CREG1,LMO2,ENO1
GO: Molecular Function	GO:0016874	ligase activity		0.9686	1	6	415	AARS,UBA1,WARS,GARS,ITCH,GSS
GO: Molecular Function	GO:0003713	transcription coactivator activity		0.9686	1	4	310	PARK7,TSG101,ACTN1,PSMC3
GO: Molecular Function	GO:0003712	transcription cofactor activity		0.9689	1	9	564	PARK7,TSG101,ACTN1,BASP1,YWHAB,CRYM,PSMC3,CREG1,ENO1
GO: Molecular Function	GO:0000988	transcription factor activity, protein binding		0.9697	1	10	614	PARK7,TSG101,ACTN1,BASP1,YWHAB,CRYM,PSMC3,CREG1,LMO2,ENO1
GO: Molecular Function	GO:0005244	voltage-gated ion channel activity		0.9711	1	2	198	CLIC1,CACNA2D1
GO: Molecular Function	GO:0022832	voltage-gated channel activity		0.9711	1	2	198	CLIC1,CACNA2D1
GO: Molecular Function	GO:0016772	transferase activity, transferring phosphorus-containing groups		0.9771	1	18	1006	STK32B,PGK1,CKB,EFEMP1,UGP2,PKM,HSP90AA1,IGF2R,NT5C2,PTGES3,CMPK1,UAP1,GNPTG,NME2,CALM1,TGFBR3,MPP5,NANS
GO: Molecular Function	GO:0022843	voltage-gated cation channel activity		0.9788	1	1	141	CACNA2D1
GO: Molecular Function	GO:0008170	N-methyltransferase activity		0.9788	1	1	141	ALKBH8
GO: Molecular Function	GO:0022836	gated channel activity		0.9791	1	4	331	CLIC1,GLRA2,CACNA2D1,CALM1
GO: Molecular Function	GO:0008276	protein methyltransferase activity		0.9793	1	1	142	ALKBH8
GO: Molecular Function	GO:0001076	transcription factor activity, RNA polymerase II transcription factor binding		0.9793	1	1	142	LMO2
GO: Molecular Function	GO:0003735	structural constituent of ribosome		0.981	1	2	216	RPLP1,UBA52
GO: Molecular Function	GO:0016747	transferase activity, transferring acyl groups other than amino-acyl groups		0.9823	1	2	219	ACAT2,FASN
GO: Molecular Function	GO:0001047	core promoter binding		0.9887	1	1	164	PARK7
GO: Molecular Function	GO:0016301	kinase activity		0.9922	1	13	853	STK32B,PGK1,CKB,EFEMP1,PKM,HSP90AA1,IGF2R,NT5C2,CMPK1,NME2,CALM1,TGFBR3,MPP5
GO: Molecular Function	GO:0042393	histone binding		0.9927	1	1	180	CTSL
GO: Molecular Function	GO:0016881	acid-amino acid ligase activity		0.9928	1	2	257	ITCH,GSS
GO: Molecular Function	GO:0008757	S-adenosylmethionine-dependent methyltransferase activity		0.9929	1	1	181	ALKBH8
GO: Molecular Function	GO:0001227	transcriptional repressor activity, RNA polymerase II transcription regulatory region sequence-specific DNA binding		0.9931	1	1	182	PROX2
GO: Molecular Function	GO:0004842	ubiquitin-protein transferase activity		0.9961	1	4	414	UBA1,UBE2V2,ITCH,CDC42
GO: Molecular Function	GO:0005216	ion channel activity		0.9969	1	4	424	CLIC1,GLRA2,CACNA2D1,CALM1
GO: Molecular Function	GO:0016879	ligase activity, forming carbon-nitrogen bonds		0.997	1	2	293	ITCH,GSS
GO: Molecular Function	GO:0008168	methyltransferase activity		0.9971	1	1	213	ALKBH8
GO: Molecular Function	GO:0008509	anion transmembrane transporter activity		0.9973	1	2	297	CLIC1,GLRA2
GO: Molecular Function	GO:0022838	substrate-specific channel activity		0.9977	1	4	438	CLIC1,GLRA2,CACNA2D1,CALM1
GO: Molecular Function	GO:0019787	ubiquitin-like protein transferase activity		0.9978	1	4	441	UBA1,UBE2V2,ITCH,CDC42
GO: Molecular Function	GO:0016741	transferase activity, transferring one-carbon groups		0.9979	1	1	225	ALKBH8
GO: Molecular Function	GO:0005215	transporter activity		0.9982	1	20	1294	CLIC1,HPX,ANXA5,APOA1,APOD,SLC2A5,IGF2R,CYB561,ATP6V1A,AZGP1,GC,PTGDS,STEAP2,GLRA2,GM2A,CACNA2D1,CALM1,LCN2,SLC44A4,TF
GO: Molecular Function	GO:0070735	protein-glycine ligase activity		0.9987	1	1	242	ITCH
GO: Molecular Function	GO:0070738	tubulin-glycine ligase activity		0.9987	1	1	242	ITCH
GO: Molecular Function	GO:0043774	coenzyme F420-2 alpha-glutamyl ligase activity		0.9987	1	1	242	ITCH
GO: Molecular Function	GO:0043773	coenzyme F420-0 gamma-glutamyl ligase activity		0.9987	1	1	242	ITCH
GO: Molecular Function	GO:0070736	protein-glycine ligase activity, initiating		0.9987	1	1	242	ITCH
GO: Molecular Function	GO:0018169	ribosomal S6-glutamic acid ligase activity		0.9987	1	1	242	ITCH
GO: Molecular Function	GO:0070737	protein-glycine ligase activity, elongating		0.9987	1	1	242	ITCH
GO: Molecular Function	GO:0008766	UDP-N-acetylmuramoylalanyl-D-glutamyl-2,6-diaminopimelate-D-alanyl-D-alanine ligase activity		0.9987	1	1	242	ITCH
GO: Molecular Function	GO:0070740	tubulin-glutamic acid ligase activity		0.9988	1	1	245	ITCH
GO: Molecular Function	GO:0015267	channel activity		0.9988	1	4	470	CLIC1,GLRA2,CACNA2D1,CALM1
GO: Molecular Function	GO:0070739	protein-glutamic acid ligase activity		0.9988	1	1	247	ITCH
GO: Molecular Function	GO:0022803	passive transmembrane transporter activity		0.9989	1	4	471	CLIC1,GLRA2,CACNA2D1,CALM1
GO: Molecular Function	GO:0022890	inorganic cation transmembrane transporter activity		0.999	1	5	542	ANXA5,ATP6V1A,CACNA2D1,SLC44A4,TF
GO: Molecular Function	GO:0016773	phosphotransferase activity, alcohol group as acceptor		0.9992	1	9	781	STK32B,EFEMP1,PKM,HSP90AA1,IGF2R,NT5C2,NME2,CALM1,TGFBR3
GO: Molecular Function	GO:0046873	metal ion transmembrane transporter activity		0.9993	1	3	426	ANXA5,CACNA2D1,TF
GO: Molecular Function	GO:0022804	active transmembrane transporter activity		0.9995	1	2	363	ANXA5,ATP6V1A
GO: Molecular Function	GO:0015077	monovalent inorganic cation transmembrane transporter activity		0.9996	1	2	375	ATP6V1A,SLC44A4
GO: Molecular Function	GO:0004674	protein serine/threonine kinase activity		0.9996	1	3	452	STK32B,NME2,TGFBR3
GO: Molecular Function	GO:0004672	protein kinase activity		0.9996	1	6	649	STK32B,EFEMP1,HSP90AA1,IGF2R,NME2,TGFBR3
GO: Molecular Function	GO:0060089	molecular transducer activity		0.9997	1	26	1708	AOC1,EFEMP1,PIGR,HSPA1A,ATRN,VTN,ANPEP,CFI,OR4P4,IGF2R,CTSH,IL6ST,PTPRF,F11R,PTPRS,GLRA2,DPP4,CALM1,LAMP1,LGALS3BP,TGFBR3,LIFR,CD14,ADGRG2,TMPRSS2,IL1RL1
GO: Molecular Function	GO:0005261	cation channel activity		0.9998	1	1	306	CACNA2D1
GO: Molecular Function	GO:0008324	cation transmembrane transporter activity		0.9999	1	5	642	ANXA5,ATP6V1A,CACNA2D1,SLC44A4,TF
GO: Molecular Function	GO:0022857	transmembrane transporter activity		0.9999	1	11	1014	CLIC1,ANXA5,SLC2A5,CYB561,ATP6V1A,AZGP1,GLRA2,CACNA2D1,CALM1,SLC44A4,TF
GO: Molecular Function	GO:0003682	chromatin binding		0.9999	1	3	513	ACTB,DHX30,LMO2
GO: Molecular Function	GO:0001228	transcriptional activator activity, RNA polymerase II transcription regulatory region sequence-specific DNA binding		0.9999	1	1	357	LMO2
GO: Molecular Function	GO:0015075	ion transmembrane transporter activity		1	1	8	873	CLIC1,ANXA5,ATP6V1A,GLRA2,CACNA2D1,CALM1,SLC44A4,TF
GO: Molecular Function	GO:0000982	transcription factor activity, RNA polymerase II proximal promoter sequence-specific DNA binding		1	1	1	365	PROX2
GO: Molecular Function	GO:0000978	RNA polymerase II proximal promoter sequence-specific DNA binding		1	1	1	379	ACTB
GO: Molecular Function	GO:0000987	proximal promoter sequence-specific DNA binding		1	1	1	398	ACTB
GO: Molecular Function	GO:0004871	signal transducer activity		1	1	23	1786	EFEMP1,PIGR,AGT,WNT7A,KLK3,RHOC,OR4P4,IGF2R,CTSH,IL6ST,PTPRF,CANT1,PTPRS,GLRA2,GNB1,GNB2,ECM1,TGFBR3,LIFR,CD14,ADGRG2,TSPAN6,IL1RL1
GO: Molecular Function	GO:0004984	olfactory receptor activity		1	1	1	426	OR4P4
GO: Molecular Function	GO:0004888	transmembrane signaling receptor activity		1	1	14	1327	EFEMP1,PIGR,OR4P4,IGF2R,CTSH,IL6ST,PTPRF,PTPRS,GLRA2,TGFBR3,LIFR,CD14,ADGRG2,IL1RL1
GO: Molecular Function	GO:0044212	transcription regulatory region DNA binding		1	1	5	860	PARK7,ACTB,BASP1,PRDX5,LMO2
GO: Molecular Function	GO:0038023	signaling receptor activity		1	1	14	1436	EFEMP1,PIGR,OR4P4,IGF2R,CTSH,IL6ST,PTPRF,PTPRS,GLRA2,TGFBR3,LIFR,CD14,ADGRG2,IL1RL1
GO: Molecular Function	GO:0001067	regulatory region nucleic acid binding		1	1	5	866	PARK7,ACTB,BASP1,PRDX5,LMO2
GO: Molecular Function	GO:0000977	RNA polymerase II regulatory region sequence-specific DNA binding		1	1	2	630	ACTB,LMO2
GO: Molecular Function	GO:0001012	RNA polymerase II regulatory region DNA binding		1	1	2	636	ACTB,LMO2
GO: Molecular Function	GO:0000981	RNA polymerase II transcription factor activity, sequence-specific DNA binding		1	1	2	675	LMO2,PROX2
GO: Molecular Function	GO:0000976	transcription regulatory region sequence-specific DNA binding		1	1	2	704	ACTB,LMO2
GO: Molecular Function	GO:0003690	double-stranded DNA binding		1	1	3	823	PARK7,ACTB,LMO2
GO: Molecular Function	GO:1990837	sequence-specific double-stranded DNA binding		1	1	2	735	ACTB,LMO2
GO: Molecular Function	GO:0004930	G-protein coupled receptor activity		1	1	3	882	OR4P4,IGF2R,ADGRG2
GO: Molecular Function	GO:0043565	sequence-specific DNA binding		1	1	2	1096	ACTB,LMO2
GO: Molecular Function	GO:0003700	DNA binding transcription factor activity		1	1	5	1264	ZNF461,NME2,LMO2,PROX2,ENO1

## Sheet: GO-BP
Category	ID	Name	Source	p-value	FDR	Hit Count in Query List	Hit Count in Genome	Hit in Query List
GO: Biological Process	GO:0006508	proteolysis		2.148e-27	1.251e-23	127	1697	A2M,HSP90B1,ACR,PARK7,SERPINF1,CD109,TSG101,DNAJB9,ADAM10,PGC,UBA52,SERPINA1,SERPINA4,UBA1,MVB12A,CPQ,WFDC2,CLU,UBE2V2,TPP1,CLN5,UCHL3,AGT,PIP,MME,MMP2,PRDX5,SERPINF2,CPVL,HSPA5,HSPA8,SDCBP,VCP,HSP90AB1,DPP7,SEMG1,SEMG2,VTN,FN1,ANPEP,ADAMTS1,FOLH1,APEH,APLP2,CPD,CPE,CPZ,XPNPEP1,VPS25,CPM,APOH,APP,KLK3,CFI,YWHAE,RUVBL1,PRCP,CST1,SLPI,CST3,CST4,CNDP2,CTSB,CTSD,CTSH,CTSL,DNAJC3,CTSZ,LGMN,CPAMD8,CTSF…
GO: Biological Process	GO:0006887	exocytosis		9.351e-22	1.361e-18	55	438	A2M,TSG101,ACTN1,SERPINA1,SERPINA4,CLU,CRISP1,FAM3C,ALB,SERPINF2,ALDOA,SDCBP,VCL,SELENOP,FN1,ANXA1,ANXA3,RAB3D,APLP2,APOA1,APOH,APP,YWHAZ,DNAJC5,RAB21,SOD1,PSAP,SPINK2,RAB11A,STEAP2,B4GALT1,QSOX1,SERPING1,RAB7A,RAB3A,RAB3B,RAB27A,RAB27B,RAP1B,PDCD6IP,CALM1,LAMP1,LAMP2,ECM1,SYT7,TF,LGALS3BP,LEFTY2,ORM1,ORM2,THBS1,CD9,TIMP1,CLEC3B,SYTL1
GO: Biological Process	GO:0045055	regulated exocytosis		5.002e-21	5.824e-18	46	315	A2M,ACTN1,SERPINA1,SERPINA4,CLU,CRISP1,FAM3C,ALB,SERPINF2,ALDOA,VCL,SELENOP,FN1,ANXA3,RAB3D,APLP2,APOA1,APOH,APP,YWHAZ,DNAJC5,SOD1,PSAP,SPINK2,STEAP2,B4GALT1,QSOX1,SERPING1,RAB3A,RAB27A,RAP1B,CALM1,LAMP1,LAMP2,ECM1,SYT7,TF,LGALS3BP,LEFTY2,ORM1,ORM2,THBS1,CD9,TIMP1,CLEC3B,SYTL1
GO: Biological Process	GO:0030162	regulation of proteolysis		1.091e-19	9.071e-17	70	760	A2M,PARK7,SERPINF1,CD109,UBA52,SERPINA1,SERPINA4,WFDC2,CLU,UBE2V2,AGT,PRDX5,SERPINF2,HSPA8,SDCBP,VCP,HSP90AB1,SEMG1,SEMG2,VTN,FN1,APLP2,APP,CFI,YWHAE,RUVBL1,CST1,SLPI,CST3,CST4,CTSH,CPAMD8,SPINK2,SPINT1,SPOCK1,PSMA2,PSMA4,PSMA5,PSMA6,PSMB1,PSMB2,PSMB3,SPINT3,PSMC3,PSMC4,PSMD5,PSME1,CFB,SPOCK3,GLG1,SERPING1,C3,C4A,SFN,GPI,ITCH,PDCD6,LCN1,ECM1,PI15,GSN,USP5,THBS1,TIMP1,TIMP2,PEBP1,CD59,CLEC3B,CDH1,…
GO: Biological Process	GO:0016192	vesicle-mediated transport		2.127e-19	1.548e-16	104	1514	A2M,HSP90B1,ACTB,TSG101,ACTN1,IGLL5,SERPINA1,SERPINA4,MVB12A,PIGR,CLU,CRISP1,SPON2,HPX,FAM3C,ALB,BAIAP2,SERPINF2,ALDOA,HSPA8,SDCBP,VCL,CAP1,VCP,HSP90AA1,HSP90AB1,EZR,SELENOP,VTN,HYOU1,FN1,ANXA1,ANXA2,ANXA3,WNT7A,ANXA11,OLFM4,RAB3D,APLP2,APOA1,APOH,APP,CFI,RAB6B,YWHAZ,ARF3,ARF4,IGF2R,DNAJC5,RAB21,CTSZ,SOD1,PSAP,SPINK2,MYO6,B2M,RAB11A,STEAP2,GDI2,B4GALT1,QSOX1,RAB10,SERPING1,RAB7A,C3,C4A,KIF5B,RAB1…
GO: Biological Process	GO:0043436	oxoacid metabolic process		1.603e-17	7.994e-15	83	1114	HEXA,HEXB,EPHX2,HGD,AARS,DDAH1,ACLY,ACO1,PARK7,AKR1A1,MDH1,PGAM1,PGD,PGK1,PGM1,B4GALT5,CKB,FAH,FASN,FBP1,AGT,UGDH,UGP2,PKM,ALDH1A1,FH,ALDOA,PLOD1,ALOX15B,FMOD,WARS,FOLH1,ANXA1,APOA1,ST6GAL1,IDH1,MINPP1,CRYM,CNDP2,SMS,PTGES3,SORD,GALNS,GAPDH,SPR,PSMA2,PSMA4,PSMA5,PSMA6,PSMB1,GARS,PSMB2,PSMB3,PSMC3,PSMC4,PSMD5,DBI,PSME1,PTGDS,PHGDH,GGT1,B4GALT1,GGH,GLB1,SPOCK3,BTD,GLO1,C3,GNS,GOT1,GPC1,GPI,LDHA,LDH…
GO: Biological Process	GO:0046903	secretion		1.648e-17	7.994e-15	88	1228	A2M,TSG101,ACTN1,FAM3D,SERPINA1,SERPINA4,CLU,CRISP1,AGT,FAM3C,ALB,SERPINF2,ALDOA,HSPA8,SDCBP,VCL,ALOX15B,EZR,SELENOP,ANG,FN1,ANPEP,ANXA1,ANXA2,ANXA3,ANXA4,WNT7A,ANXA5,AGR2,RAB3D,APLP2,APOA1,APOH,APP,APRT,PPIA,YWHAZ,CARTPT,DNAJC5,RAB21,SOD1,PSAP,SPINK2,MYO6,STARD10,RAB11A,GC,STEAP2,ACE,B4GALT1,QSOX1,SERPING1,RAB7A,KIF5B,RAB1A,RAB3A,RAB3B,RAB27A,RAB27B,CA2,NOV,PNP,RAP1B,PDCD6IP,CALM1,CAMP,LAMP1,LAM…
GO: Biological Process	GO:0005975	carbohydrate metabolic process		1.139e-16	4.736e-14	68	823	HEXA,HEXB,MAN2A1,MAN2B1,MANBA,AKR1A1,MDH1,PGAM1,PGD,PGK1,PGM1,B4GALT5,SIAE,UBA52,SERPINA1,FBP1,CLN5,UGDH,UGP2,PKM,PGLS,ALDH1A1,ALDOA,VCP,ST6GAL1,IDH1,APOD,SLC2A5,ARF4,PPP1CB,AKR7A2,IGFBP4,IGFBP5,CTBS,CHID1,FUCA1,FUCA2,FUT5,PTGES3,MUC6,IL6ST,GAA,SORD,IMPA1,GALM,GAPDH,GLB1L,CCDC126,FBP2,GNPTG,B4GALT1,NEU1,GLA,GLB1,GLO1,GM2A,PYGB,GOT1,GPI,CALM1,MUC5B,LDHA,LDHB,LDHC,THBS1,NANS,ENO1,TPI1
GO: Biological Process	GO:0052547	regulation of peptidase activity		3.598e-16	1.309e-13	46	416	A2M,PARK7,SERPINF1,CD109,SERPINA1,SERPINA4,WFDC2,AGT,PRDX5,SERPINF2,VCP,SEMG1,SEMG2,VTN,FN1,APLP2,APP,YWHAE,CST1,SLPI,CST3,CST4,CTSH,CPAMD8,SPINK2,SPINT1,SPOCK1,SPINT3,PSME1,SPOCK3,SERPING1,C3,C4A,SFN,GPI,PDCD6,LCN1,ECM1,PI15,GSN,THBS1,TIMP1,TIMP2,PEBP1,CDH1,SERPINA5
GO: Biological Process	GO:0055114	oxidation-reduction process		2.933e-11	4.493e-09	65	996	HGD,AOC1,ACO1,PARK7,AKR1A1,MDH1,PGAM1,PGD,PGK1,PGM1,TXN,ADH5,UBA52,FASN,UGDH,UGP2,PKM,ALDH1A1,FH,PRDX5,ALDOA,PLOD1,VCP,ALOX15B,CP,APOA1,IDH1,APOD,PRDX6,PPP1CB,AKR7A2,CRYM,PTGES3,IL6ST,GAA,SOD1,SOD3,SORD,CYB561,GAPDH,SPR,DBI,STEAP2,CREG1,GDI2,PHGDH,BLVRB,QSOX1,ALKBH8,PYGB,GPI,PLOD3,CALM1,GPX3,STEAP4,TXNDC17,PRDX2,LDHA,LDHB,CBR1,PDIA3,LDHC,PRDX1,ENO1,TPI1
GO: Biological Process	GO:1901575	organic substance catabolic process		9.457e-26	2.753e-22	133	1910	HEXA,HEXB,EPHX2,HGD,HSP90B1,DDAH1,MAN2B1,MANBA,RPLP1,ACR,ESD,PARK7,TSG101,AKR1A1,DNAJB9,PGAM1,PGC,PGK1,PGM1,ADH5,FAH,UBA52,UBA1,FBP1,MVB12A,CPQ,PLA1A,CLU,UBE2V2,LIPG,TPP1,CLN5,UCHL3,HPRT1,PKM,PLA2G2A,ALDH1A1,ALDOA,CPVL,HSPA5,SDCBP,VCP,HSP90AB1,EZR,FMOD,ANPEP,ANXA2,APOA1,CPE,XPNPEP1,VPS25,IDH1,APOH,YWHAH,DIS3,PRDX6,PPP1CB,PPP2R1A,CRYM,RNASET2,CST3,NT5C2,CTBS,SMPD1,CHID1,FUCA1,FUCA2,FUT5,CTSB,CTSD,…
GO: Biological Process	GO:0002576	platelet degranulation		6.192e-25	1.202e-21	32	107	A2M,ACTN1,SERPINA1,SERPINA4,CLU,FAM3C,ALB,SERPINF2,ALDOA,VCL,SELENOP,FN1,APLP2,APOA1,APOH,APP,SOD1,PSAP,QSOX1,SERPING1,CALM1,LAMP2,ECM1,TF,LGALS3BP,LEFTY2,ORM1,ORM2,THBS1,CD9,TIMP1,CLEC3B
GO: Biological Process	GO:0044248	cellular catabolic process		6.898e-21	6.694e-18	120	1828	HEXA,HEXB,EPHX2,HGD,HSP90B1,DDAH1,MANBA,RPLP1,ACR,ESD,PARK7,TSG101,AKR1A1,DNAJB9,PGAM1,PGM1,ADH5,FAH,UBA52,UBA1,FBP1,MVB12A,CPQ,CLU,UBE2V2,LIPG,TPP1,UCHL3,HPRT1,PRDX5,CPVL,HSPA5,SDCBP,HSPB1,VCP,HSP90AB1,EZR,FMOD,ANPEP,ANXA2,APOA1,CPE,XPNPEP1,VPS25,IDH1,APOH,DIS3,PRDX6,PPP1CB,PPP2R1A,CRYM,RUVBL1,RNASET2,CST3,NT5C2,SMPD1,CTSB,CTSH,CTSL,DNAJC3,CTSZ,GAA,SORD,LGMN,ATP6V1A,CTSF,GALNS,PSAP,GAPDH,ERAP1,P…
GO: Biological Process	GO:0043086	negative regulation of catalytic activity		1.305e-18	8.44e-16	74	877	A2M,PARK7,SERPINF1,CD109,UBA52,SERPINA1,SERPINA4,WFDC2,AGT,PRDX5,SERPINF2,HSPB1,VTN,ANXA1,ANXA2,ANXA3,ANXA4,ANXA5,APCS,APLP2,APOA1,APP,YWHAE,YWHAG,ZFYVE28,PPP2R1A,CST1,SLPI,CST3,CST4,PRKAR2A,SMPD1,DNAJC3,CPAMD8,CAND1,SPINK2,SPINT1,SPOCK1,PSMA2,PSMA4,PSMA5,PSMA6,PSMB1,PSMB2,PSMB3,SPINT3,PSMC3,PSMC4,PSMD5,PSME1,TMBIM1,IQGAP1,PTN,GLA,F11R,SPOCK3,SERPING1,C3,C4A,SFN,GPI,LCN1,TMBIM6,ECM1,PI15,GSTP1,TH…
GO: Biological Process	GO:0006082	organic acid metabolic process		1.199e-17	6.979e-15	84	1131	HEXA,HEXB,EPHX2,HGD,AARS,DDAH1,ACLY,ACO1,PARK7,AKR1A1,MDH1,PGAM1,PGD,PGK1,PGM1,B4GALT5,CKB,FAH,FASN,FBP1,AGT,UGDH,UGP2,PKM,ALDH1A1,FH,ALDOA,PLOD1,ALOX15B,FMOD,WARS,FOLH1,ANXA1,APOA1,ST6GAL1,IDH1,MINPP1,CRYM,CNDP2,SMS,PTGES3,SORD,GALNS,GAPDH,SPR,PSMA2,PSMA4,PSMA5,PSMA6,PSMB1,GARS,PSMB2,PSMB3,PSMC3,PSMC4,PSMD5,DBI,PSME1,PTGDS,PHGDH,GGT1,B4GALT1,GGH,GLB1,SPOCK3,BTD,GLO1,C3,GNS,GOT1,PNP,GPC1,GPI,LDHA…
GO: Biological Process	GO:0010466	negative regulation of peptidase activity		6.484e-17	2.904e-14	37	257	A2M,PARK7,SERPINF1,CD109,SERPINA1,SERPINA4,WFDC2,AGT,PRDX5,SERPINF2,VTN,APLP2,APP,YWHAE,CST1,SLPI,CST3,CST4,CPAMD8,SPINK2,SPINT1,SPOCK1,SPINT3,SPOCK3,SERPING1,C3,C4A,SFN,GPI,LCN1,ECM1,PI15,THBS1,TIMP1,TIMP2,PEBP1,SERPINA5
GO: Biological Process	GO:0032940	secretion by cell		1.603e-16	6.221e-14	80	1090	A2M,TSG101,ACTN1,FAM3D,SERPINA1,SERPINA4,CLU,CRISP1,AGT,FAM3C,ALB,SERPINF2,ALDOA,HSPA8,SDCBP,VCL,ALOX15B,EZR,SELENOP,ANG,FN1,ANXA1,ANXA3,ANXA4,WNT7A,ANXA5,RAB3D,APLP2,APOA1,APOH,APP,PPIA,YWHAZ,CARTPT,DNAJC5,RAB21,SOD1,PSAP,SPINK2,MYO6,RAB11A,STEAP2,B4GALT1,QSOX1,SERPING1,RAB7A,KIF5B,RAB1A,RAB3A,RAB3B,RAB27A,RAB27B,NOV,PNP,RAP1B,PDCD6IP,CALM1,CAMP,LAMP1,LAMP2,FAM3B,TMBIM6,SLC44A4,ECM1,SYT7,TF,LGAL…
GO: Biological Process	GO:0044092	negative regulation of molecular function		4.771e-16	1.634e-13	82	1157	A2M,PARK7,SERPINF1,CD109,UBA52,SERPINA1,SERPINA4,WFDC2,AGT,PRDX5,SERPINF2,HSPA5,HSPB1,VTN,ANXA1,ANXA2,ANXA3,ANXA4,ANXA5,APCS,APLP2,APOA1,APP,YWHAE,YWHAG,ZFYVE28,PPP2R1A,CST1,SLPI,CST3,CST4,PRKAR2A,SMPD1,DNAJC3,CPAMD8,CAND1,SPINK2,SPINT1,SPOCK1,PSMA2,PSMA4,PSMA5,PSMA6,B2M,PSMB1,PSMB2,PSMB3,SPINT3,PSMC3,PSMC4,PSMD5,PSME1,ACE,TMBIM1,IQGAP1,PTN,GLA,PTPRF,F11R,SPOCK3,SERPING1,C3,C4A,SFN,GPI,ITCH,CALM1…
GO: Biological Process	GO:0010951	negative regulation of endopeptidase activity		5.877e-16	1.901e-13	35	245	A2M,PARK7,SERPINF1,CD109,SERPINA1,SERPINA4,WFDC2,AGT,PRDX5,SERPINF2,VTN,APLP2,APP,YWHAE,CST1,SLPI,CST3,CST4,CPAMD8,SPINK2,SPINT1,SPOCK1,SPINT3,SPOCK3,SERPING1,C3,C4A,SFN,GPI,LCN1,THBS1,TIMP1,TIMP2,PEBP1,SERPINA5
GO: Biological Process	GO:0051346	negative regulation of hydrolase activity		1.912e-15	5.827e-13	45	417	A2M,PARK7,SERPINF1,CD109,SERPINA1,SERPINA4,WFDC2,AGT,PRDX5,SERPINF2,VTN,ANXA1,APCS,APLP2,APOA1,APP,YWHAE,CST1,SLPI,CST3,CST4,CPAMD8,SPINK2,SPINT1,SPOCK1,SPINT3,IQGAP1,F11R,SPOCK3,SERPING1,C3,C4A,SFN,GPI,LCN1,TMBIM6,ECM1,PI15,THBS1,TIMP1,TIMP2,PEBP1,LTF,AGRN,SERPINA5
GO: Biological Process	GO:0045861	negative regulation of proteolysis		2.002e-15	5.827e-13	42	366	A2M,PARK7,SERPINF1,CD109,SERPINA1,SERPINA4,WFDC2,AGT,PRDX5,SERPINF2,SDCBP,HSP90AB1,VTN,APLP2,APP,YWHAE,CST1,SLPI,CST3,CST4,CPAMD8,SPINK2,SPINT1,SPOCK1,SPINT3,SPOCK3,GLG1,SERPING1,C3,C4A,SFN,GPI,LCN1,ECM1,PI15,THBS1,TIMP1,TIMP2,PEBP1,CD59,CDH1,SERPINA5
GO: Biological Process	GO:0009611	response to wounding		3.125e-15	8.663e-13	72	967	A2M,PARK7,MATN2,SERPINF1,ACTB,CD109,REG3G,ACTN1,SERPINA1,CPQ,CLU,CLIC1,AGT,PKM,PLA2G2A,MMP2,SERPINF2,HSPB1,VCL,VTN,FN1,ANXA1,ANXA2,WNT7A,ANXA5,APCS,APOA1,APOD,APOH,CFI,YWHAZ,ARF4,RHOC,PRCP,PRKAR2A,CHID1,CTSB,IL6ST,SOD1,PSMA6,ACE,PATE4,CFB,GGT1,B4GALT1,PTPRF,SERPING1,C3,C4A,GNB1,RAB27A,NOV,CD177,DOCK9,CAPZA1,LAMB2,CORO1B,PRDX2,LCP1,SYT7,GSN,GSTP1,THBS1,CD9,TIMP1,LPL,TSPAN8,CD59,CD81,IL1RL1,CDC42,S…
GO: Biological Process	GO:0052548	regulation of endopeptidase activity		5.085e-15	1.346e-12	43	393	A2M,PARK7,SERPINF1,CD109,SERPINA1,SERPINA4,WFDC2,AGT,PRDX5,SERPINF2,VCP,SEMG1,SEMG2,VTN,APLP2,APP,YWHAE,CST1,SLPI,CST3,CST4,CTSH,CPAMD8,SPINK2,SPINT1,SPOCK1,SPINT3,PSME1,SPOCK3,SERPING1,C3,C4A,SFN,GPI,PDCD6,LCN1,GSN,THBS1,TIMP1,TIMP2,PEBP1,CDH1,SERPINA5
GO: Biological Process	GO:0006952	defense response		1.537e-14	3.74e-12	99	1651	A2M,EPHX2,HSP90B1,PARK7,SERPINF1,REG3G,CRISP3,MDH1,PGC,IGLL5,UBA52,SERPINA1,PLAA,CLU,SPON2,AGT,HPX,PLA2G2A,MMP2,PRDX5,SERPINF2,HSPA1A,HSP90AB1,SEMG1,ATRN,SEMG2,VTN,ANG,FN1,ANXA1,ANXA3,ANXA5,APCS,APOA1,APOD,APP,KLK3,CFI,YWHAZ,IGFBP4,PRCP,SLPI,CST3,CHID1,CTSB,CTSL,DNAJC3,IL6ST,LGMN,GAPDH,ERAP1,PSMA2,PSMA4,PSMA5,PSMA6,B2M,PSMB1,PSMB2,PSMB3,PSMC3,PSMC4,PSMD5,DBI,PSME1,ACE,CFB,GGT1,B4GALT1,F11R,SERPIN…
GO: Biological Process	GO:0051248	negative regulation of protein metabolic process		1.542e-14	3.74e-12	80	1183	A2M,RIDA,PARK7,SERPINF1,CD109,UBA52,SERPINA1,SERPINA4,WFDC2,CLU,AGT,PRDX5,SERPINF2,ITM2B,HSPA1A,SDCBP,HSPB1,HSP90AB1,EZR,VTN,ANG,ANXA2,APCS,APLP2,APOD,APP,YWHAB,YWHAE,YWHAG,ZFYVE28,PPP2R1A,IGFBP5,CST1,SLPI,CST3,CST4,PRKAR2A,SMPD1,DNAJC3,CPAMD8,SPINK2,SPINT1,GAPDH,SPOCK1,PSMA2,PSMA4,PSMA5,PSMA6,PSMB1,PSMB2,PSMB3,SPINT3,PSMC3,PSMC4,PSMD5,PSME1,SPOCK3,GLG1,SERPING1,OS9,C3,C4A,SFN,GPI,FAM129A,ITCH,CA…
GO: Biological Process	GO:0030198	extracellular matrix organization		1.618e-14	3.768e-12	40	354	A2M,PARK7,ADAM10,TTR,MFAP4,AGT,MMP2,SERPINF2,HSPA8,HSP90AB1,COL6A2,COL12A1,VTN,FMOD,FN1,ANXA2,APLP2,VWA1,APP,CST3,CTSL,SPINT1,SMOC2,B4GALT1,F11R,KLK2,CRISPLD2,DPP4,PLOD3,LAMA5,LAMB2,LAMC1,LCP1,GSN,COL18A1,THBS1,TIMP1,TIMP2,CDH1,AGRN
GO: Biological Process	GO:0043062	extracellular structure organization		1.779e-14	3.983e-12	40	355	A2M,PARK7,ADAM10,TTR,MFAP4,AGT,MMP2,SERPINF2,HSPA8,HSP90AB1,COL6A2,COL12A1,VTN,FMOD,FN1,ANXA2,APLP2,VWA1,APP,CST3,CTSL,SPINT1,SMOC2,B4GALT1,F11R,KLK2,CRISPLD2,DPP4,PLOD3,LAMA5,LAMB2,LAMC1,LCP1,GSN,COL18A1,THBS1,TIMP1,TIMP2,CDH1,AGRN
GO: Biological Process	GO:0019752	carboxylic acid metabolic process		2.014e-14	4.344e-12	72	1003	EPHX2,HGD,AARS,DDAH1,ACLY,ACO1,PARK7,AKR1A1,MDH1,PGAM1,PGD,PGK1,PGM1,CKB,FAH,FASN,FBP1,AGT,UGDH,UGP2,PKM,ALDH1A1,FH,ALDOA,PLOD1,ALOX15B,WARS,FOLH1,ANXA1,APOA1,ST6GAL1,IDH1,CRYM,CNDP2,SMS,PTGES3,SORD,GAPDH,SPR,PSMA2,PSMA4,PSMA5,PSMA6,PSMB1,GARS,PSMB2,PSMB3,PSMC3,PSMC4,PSMD5,DBI,PSME1,PTGDS,PHGDH,GGT1,GGH,BTD,GLO1,C3,GOT1,GPI,LDHA,LDHB,CBR1,LDHC,GSS,LIPA,P4HB,LPL,SCPEP1,ENO1,TPI1
GO: Biological Process	GO:0009719	response to endogenous stimulus		6.183e-14	1.286e-11	101	1740	AARS,HSP90B1,AOC1,CFL1,ACR,PARK7,SERPINF1,CD109,LRG1,UBA52,SERPINA1,UCHL3,HPRT1,AGT,PKM,ALAD,MMP2,BAIAP2,PLOD1,HSPA5,SDCBP,HSP90AA1,EZR,FMOD,ANG,FN1,ADAMTS1,ANXA1,GDF15,ANXA2,ANXA3,WNT7A,ANXA5,APOA1,MSI1,IDH1,APP,APRT,YWHAG,YWHAH,ARSA,IGFBP5,PLPP1,PRCP,PRKAR2A,SMPD1,CTSB,CTSH,PTGES3,CTSL,SOD1,SORD,ATP6V1A,SPINT1,PSMB2,GC,PTGDS,STEAP2,CFB,IQGAP1,PTN,GGH,RAB10,PTPRF,F11R,GLG1,GLRA2,C3,TWSG1,GNB1,GN…
GO: Biological Process	GO:0009057	macromolecule catabolic process		9.257e-14	1.858e-11	80	1223	HEXA,HEXB,HSP90B1,MANBA,RPLP1,ACR,PARK7,TSG101,DNAJB9,PGC,PGM1,UBA52,UBA1,MVB12A,CLU,UBE2V2,TPP1,CLN5,UCHL3,CPVL,HSPA5,SDCBP,VCP,HSP90AB1,EZR,FMOD,ANXA2,VPS25,DIS3,PPP1CB,PPP2R1A,RNASET2,CST3,CTBS,CHID1,FUCA1,CTSB,CTSD,CTSH,CTSL,DNAJC3,CTSZ,GAA,LGMN,CTSF,GALNS,PSMA2,PSMA4,PSMA5,PSMA6,PSMB1,PSMB2,PSMB3,NAGLU,PSMC3,PSMC4,PSMD5,PSME1,ACE,GLB1,RAB7A,PYGB,OS9,GNS,DNASE2,GPC1,ITCH,PDCD6IP,CALM1,USP5,RN…
GO: Biological Process	GO:0016052	carbohydrate catabolic process		1.03e-13	2e-11	26	157	HEXB,MAN2B1,MANBA,AKR1A1,PGAM1,PGK1,PGM1,FBP1,PKM,ALDH1A1,ALDOA,PPP1CB,CTBS,FUT5,GAA,SORD,GAPDH,NEU1,GLB1,GM2A,PYGB,GPI,CALM1,LDHA,ENO1,TPI1
GO: Biological Process	GO:0080134	regulation of response to stress		1.28e-13	2.403e-11	94	1579	A2M,HSP90B1,HEBP2,PARK7,SERPINF1,CD109,REG3G,MDH1,PGC,TXN,UBA52,CLU,UBE2V2,AGT,HPX,PLA2G2A,MMP2,SERPINF2,HSPA1A,HSPA5,HSPA8,SDCBP,HSPB1,HSP90AA1,HSP90AB1,EZR,VTN,HYOU1,ANXA1,ANXA2,WNT7A,ANXA5,AGR2,APCS,APOA1,APOD,APOH,CFI,YWHAE,RUVBL1,CHID1,CTSB,PTGES3,CTSL,DNAJC3,IL6ST,SOD1,LGMN,ATP6V1A,PSAP,GAPDH,ERAP1,PSMA2,PSMA4,PSMA5,PSMA6,B2M,PSMB1,PSMB2,PSMB3,PSMC3,PSMC4,PSMD5,PSME1,ACE,CFB,GGT1,QSOX1,PTPR…
GO: Biological Process	GO:0032269	negative regulation of cellular protein metabolic process		1.336e-13	2.432e-11	75	1112	A2M,RIDA,PARK7,SERPINF1,CD109,UBA52,SERPINA1,SERPINA4,WFDC2,AGT,PRDX5,SERPINF2,HSPA1A,SDCBP,HSPB1,HSP90AB1,EZR,VTN,ANG,ANXA2,APLP2,APP,YWHAB,YWHAE,YWHAG,ZFYVE28,PPP2R1A,IGFBP5,CST1,SLPI,CST3,CST4,PRKAR2A,SMPD1,DNAJC3,CPAMD8,SPINK2,SPINT1,GAPDH,SPOCK1,PSMA2,PSMA4,PSMA5,PSMA6,PSMB1,PSMB2,PSMB3,SPINT3,PSMC3,PSMC4,PSMD5,PSME1,SPOCK3,GLG1,SERPING1,C3,C4A,SFN,GPI,FAM129A,ITCH,CALM1,CALR,LCN1,ECM1,PI15,…
GO: Biological Process	GO:1901565	organonitrogen compound catabolic process		9.909e-13	1.748e-10	38	365	HEXA,HEXB,HGD,DDAH1,FAH,CPQ,TPP1,HPRT1,VCP,FMOD,ANPEP,CPE,XPNPEP1,CRYM,NT5C2,CTBS,SMPD1,CHID1,FUCA1,CTSH,GALNS,ERAP1,NAGLU,ACE,GGT1,BLVRB,NEU1,GLA,GLB1,SMPDL3A,GM2A,GNS,GOT1,PNP,GPC1,LNPEP,AGRN,SPACA3
GO: Biological Process	GO:1901135	carbohydrate derivative metabolic process		2.967e-12	5.081e-10	80	1307	HEXA,HEXB,MAN2A1,MANBA,ACR,PARK7,ACPP,AKR1A1,PGAM1,PGD,PGK1,PGM1,B4GALT5,SERPINA1,FBP1,PLA1A,HPRT1,UGDH,UGP2,PKM,PGLS,PLA2G2A,ALDH1A1,ALDOA,ITM2B,HSPA1A,HSPA8,CAP1,VCP,FMOD,APCS,ST6GAL1,APRT,ARF4,AKR7A2,ARSA,ASAH1,CST3,NT5C2,CTBS,SMPD1,CHID1,FUCA1,FUCA2,FUT5,MUC6,SORD,ATP6V1A,CMPK1,UAP1,GALNS,PSAP,GAPDH,NAGLU,CCDC126,GNPTG,B4GALT1,NEU1,GLA,GLB1,CANT1,SPOCK3,GM2A,NME2,RAB1A,GNS,PNP,GPC1,GPI,CALM1,…
GO: Biological Process	GO:0043603	cellular amide metabolic process		1.195e-11	1.987e-09	67	1023	HEXA,HEXB,RIDA,AARS,RPLP1,ACO1,PGAM1,UBA52,FASN,CPQ,CLU,CLIC1,TPP1,CLN5,AGT,MME,NAXE,HSPB1,ANG,WARS,ANPEP,FOLH1,APEH,CPD,CPE,CPZ,XPNPEP1,CPM,IDH1,APP,KLK3,PPP2R1A,IGFBP5,ASAH1,CNDP2,SMPD1,CTSH,DNAJC3,CTSZ,SOD1,GAPDH,ERAP1,GARS,ACE,GGT1,GGH,NEU1,GLA,SMPDL3A,BTD,GLO1,GM2A,PTCD3,FAM129A,CALR,GPX3,NCSTN,GSS,GSTM3,GSTP1,GSTT2,THBS1,EEF1G,EEF2,NAMPT,LNPEP,EIF5A
GO: Biological Process	GO:0010035	response to inorganic substance		1.664e-11	2.692e-09	46	559	AOC1,ACO1,PARK7,SERPINF1,TXN,FBP1,CLU,ALAD,ALB,MMP2,HSPA5,FN1,ANXA1,ANXA5,ANXA7,ANXA11,CP,APP,CUTA,SOD1,SOD3,SORD,PSAP,B2M,IQGAP1,GGH,GLRA2,C3,CA2,PDCD6,CALM1,CALR,PRDX2,LCN2,LDHA,TF,GSN,GSS,GSTP1,COL18A1,THBS1,EEF2,CD9,CD14,PRDX1,CDH1
GO: Biological Process	GO:0010941	regulation of cell death		2.432e-11	3.826e-09	91	1650	AARS,HSP90B1,HEBP2,CFL1,PARK7,SERPINF1,ACTN1,TXN,UBA52,CLU,UBE2V2,AGT,PIP,ALB,ALDH1A1,MMP2,PRDX5,HSPA1A,HSPA5,HSPA8,HSPB1,VCP,HSP90AB1,HYOU1,FN1,ANXA1,GDF15,ANXA4,WNT7A,ANXA5,AGR2,OLFM4,ST6GAL1,APOH,YWHAB,YWHAE,YWHAG,YWHAH,YWHAZ,ARF4,PPP2R1A,IGF2R,RUVBL1,CST3,DNAJC5,SMPD1,CTSB,CTSH,PTGES3,DNAJC3,IL6ST,SOD1,LGMN,PSAP,ACE,TMBIM1,B4GALT1,PTN,PTPRF,GLO1,YWHAQ,NME2,NOV,SFN,PNP,GPI,ITCH,PDCD6,CALR,ARHG…
GO: Biological Process	GO:0042060	wound healing		3.227e-11	4.754e-09	46	570	A2M,ACTB,CD109,REG3G,ACTN1,SERPINA1,CPQ,CLIC1,PKM,SERPINF2,HSPB1,VCL,VTN,FN1,ANXA1,ANXA2,WNT7A,ANXA5,APCS,APOD,APOH,YWHAZ,RHOC,PRCP,PRKAR2A,B4GALT1,SERPING1,C3,GNB1,RAB27A,NOV,CD177,DOCK9,CAPZA1,CORO1B,PRDX2,LCP1,SYT7,GSN,THBS1,CD9,TIMP1,TSPAN8,CD59,CDC42,SERPINA5
GO: Biological Process	GO:0019882	antigen processing and presentation		3.266e-11	4.754e-09	28	232	CTSD,CTSH,CTSL,LGMN,CTSF,ERAP1,PSMA2,AZGP1,PSMA4,PSMA5,PSMA6,B2M,PSMB1,PSMB2,PSMB3,PSMC3,PSMC4,PSMD5,PSME1,ACE,RAB10,RAB7A,RAB3B,RAB27A,CALR,PDIA3,THBS1,LNPEP
GO: Biological Process	GO:0019318	hexose metabolic process		3.928e-11	5.577e-09	30	267	MAN2A1,MAN2B1,AKR1A1,MDH1,PGAM1,PGK1,PGM1,FBP1,PKM,ALDH1A1,ALDOA,APOD,PPP1CB,IGFBP4,IGFBP5,FUCA1,FUCA2,FUT5,GAA,SORD,GALM,GAPDH,FBP2,B4GALT1,GLB1,GOT1,GPI,LDHA,ENO1,TPI1
GO: Biological Process	GO:0016485	protein processing		4.161e-11	5.769e-09	34	338	A2M,ADAM10,CLN5,AGT,MME,SERPINF2,VCP,VTN,CPD,CPE,CPZ,CPM,APOH,KLK3,CFI,RUVBL1,CTSH,CTSZ,LGMN,ACE,CFB,GGT1,GLG1,SERPING1,C3,C4A,PDCD6,NCSTN,GSN,THBS1,CD59,TMPRSS2,CLEC3B,CDH1
GO: Biological Process	GO:0006457	protein folding		4.916e-11	6.656e-09	28	236	AARS,HSP90B1,TXN,CLU,HSPA1A,HSPA2,HSPA5,HSPA6,HSPA8,HSP90AA1,HSP90AB1,HSPA4L,APCS,CCT2,PPIA,PPIB,PPIC,CCT5,PTGES3,B2M,QSOX1,GNB1,GNB2,CALR,PDIA3,SIL1,CCT6A,P4HB
GO: Biological Process	GO:0002474	antigen processing and presentation of peptide antigen via MHC class I		5.483e-11	7.254e-09	18	94	ERAP1,PSMA2,AZGP1,PSMA4,PSMA5,PSMA6,B2M,PSMB1,PSMB2,PSMB3,PSMC3,PSMC4,PSMD5,PSME1,ACE,CALR,PDIA3,LNPEP
GO: Biological Process	GO:0010038	response to metal ion		7.52e-11	9.729e-09	35	364	AOC1,ACO1,PARK7,SERPINF1,FBP1,CLU,ALAD,ALB,HSPA5,FN1,ANXA5,ANXA7,ANXA11,CP,APP,CUTA,SOD1,SOD3,SORD,B2M,IQGAP1,GGH,GLRA2,C3,CA2,PDCD6,CALM1,CALR,TF,GSN,GSS,GSTP1,THBS1,CD14,CDH1
GO: Biological Process	GO:0051604	protein maturation		8.75e-11	1.107e-08	35	366	A2M,ADAM10,CLN5,AGT,MME,SERPINF2,VCP,VTN,CPD,CPE,CPZ,CPM,APOH,KLK3,CFI,RUVBL1,CTSH,CTSZ,LGMN,ACE,CFB,GGT1,GLG1,SERPING1,C3,C4A,PDCD6,CALR,NCSTN,GSN,THBS1,CD59,TMPRSS2,CLEC3B,CDH1
GO: Biological Process	GO:0002682	regulation of immune system process		9.515e-11	1.179e-08	84	1506	A2M,HSP90B1,ACTB,REG3G,MDH1,ADAM10,PGC,IGLL5,SIAE,UBA52,PIGR,CLU,SPON2,PIP,HPX,MMP2,BAIAP2,HSPA1A,HSPA8,HSP90AA1,HSP90AB1,EZR,VTN,ANXA1,ANXA5,OLFM4,APCS,APOA1,APOD,CFI,CARTPT,CTSB,CTSH,CTSL,IL6ST,SOD1,LGMN,ERAP1,PSMA2,PSMA4,PSMA5,PSMA6,B2M,PSMB1,PSMB2,PSMB3,PSMC3,PSMC4,PSMD5,PSME1,ACE,CFB,GGT1,TEX101,SERPING1,C3,C4A,NME2,CA2,NOV,PNP,DPP4,ITCH,CALM1,CALR,LAMP1,MUC5B,PRDX2,TMBIM6,ECM1,GSN,ORM1,ORM2…
GO: Biological Process	GO:1901700	response to oxygen-containing compound		1.01e-10	1.226e-08	88	1614	AARS,HSP90B1,AOC1,HEBP2,CFL1,PARK7,SERPINF1,TXN,ADH5,SERPINA1,SPON2,UCHL3,AGT,PKM,ALAD,ALDH1A1,MMP2,BAIAP2,PRDX5,EZR,COL6A2,FN1,ADAMTS1,ANXA1,WNT7A,ANXA5,ST6GAL1,APOD,APOH,APP,APRT,YWHAG,PRDX6,SLC2A5,ARSA,IGF2R,IGFBP5,SLPI,PRKAR2A,SMPD1,CTSB,CTSH,SOD1,SOD3,ATP6V1A,PSAP,B2M,GC,ACE,PTN,GGH,RAB10,PTPRF,GLRA2,C3,KIF5B,GNB1,GNB2,GOT1,CA2,RAP1B,CALM1,CALR,GPX3,PRDX2,LCN2,TMBIM6,LDHA,PDIA3,GSN,GSS,GSTP1…
GO: Biological Process	GO:0046365	monosaccharide catabolic process		1.08e-10	1.283e-08	15	64	AKR1A1,PGAM1,PGK1,PGM1,PKM,ALDH1A1,ALDOA,FUT5,SORD,GAPDH,GLB1,GPI,LDHA,ENO1,TPI1
GO: Biological Process	GO:0030163	protein catabolic process		1.505e-10	1.752e-08	57	844	HSP90B1,MANBA,ACR,PARK7,TSG101,DNAJB9,PGC,UBA52,UBA1,MVB12A,CLU,UBE2V2,TPP1,CLN5,UCHL3,CPVL,HSPA5,SDCBP,VCP,HSP90AB1,EZR,ANXA2,VPS25,CST3,CTSB,CTSD,CTSH,CTSL,DNAJC3,CTSZ,LGMN,CTSF,PSMA2,PSMA4,PSMA5,PSMA6,PSMB1,PSMB2,PSMB3,PSMC3,PSMC4,PSMD5,PSME1,ACE,RAB7A,OS9,GPC1,ITCH,PDCD6IP,USP5,TIMP1,TIMP2,LNPEP,SCPEP1,CD81,VPS28,CDC42
GO: Biological Process	GO:0050776	regulation of immune response		2.134e-10	2.436e-08	59	899	A2M,HSP90B1,ACTB,REG3G,PGC,IGLL5,UBA52,PIGR,CLU,SPON2,HPX,MMP2,BAIAP2,HSPA1A,HSPA8,HSP90AA1,HSP90AB1,EZR,VTN,ANXA1,OLFM4,APOA1,CFI,CTSB,CTSH,CTSL,IL6ST,LGMN,ERAP1,PSMA2,PSMA4,PSMA5,PSMA6,B2M,PSMB1,PSMB2,PSMB3,PSMC3,PSMC4,PSMD5,PSME1,CFB,SERPING1,C3,C4A,PNP,DPP4,ITCH,CALM1,LAMP1,ECM1,CD14,CD38,TSPAN6,CD59,CD81,IL1RL1,LTF,CDC42
GO: Biological Process	GO:0060429	epithelium development		2.183e-10	2.444e-08	75	1296	AARS,CFL1,CD109,REG3G,TSG101,PFN1,PGK1,UBA52,BASP1,TPP1,AGT,TAGLN2,ALDH1A1,MMP2,PLOD1,MLPH,PLS3,VCL,ALOX15B,EZR,SEMA3C,ANXA1,ANXA4,WNT7A,ANXA7,AGR2,RHOC,IGFBP5,CTSB,CTSD,CTSH,CTSZ,SOD1,PRSS8,PSAP,SPINT1,MYO6,PSMA2,PSMA4,PSMA5,PSMA6,PSMB1,PSMB2,PSMB3,PSMC3,PSMC4,PSMD5,DBI,PSME1,PHGDH,IQGAP1,B4GALT1,PTN,RAB10,F11R,PTPRS,CAPN5,NME2,RAB1A,RAB27A,CA2,SFN,RAP1B,PLOD3,LAMA5,LAMB2,LCP1,CBR1,GSN,GSTM3,TGF…
GO: Biological Process	GO:0050778	positive regulation of immune response		2.367e-10	2.6e-08	49	671	A2M,HSP90B1,ACTB,REG3G,PGC,IGLL5,UBA52,CLU,SPON2,HPX,MMP2,BAIAP2,HSPA1A,HSPA8,HSP90AA1,HSP90AB1,EZR,VTN,ANXA1,CFI,CTSB,CTSL,IL6ST,LGMN,PSMA2,PSMA4,PSMA5,PSMA6,B2M,PSMB1,PSMB2,PSMB3,PSMC3,PSMC4,PSMD5,PSME1,CFB,SERPING1,C3,C4A,PNP,ITCH,LAMP1,CD14,CD38,TSPAN6,CD59,LTF,CDC42
GO: Biological Process	GO:0043067	regulation of programmed cell death		2.534e-10	2.732e-08	84	1536	AARS,HSP90B1,CFL1,PARK7,ACTN1,UBA52,CLU,UBE2V2,AGT,PIP,ALB,ALDH1A1,MMP2,PRDX5,HSPA1A,HSPA5,HSPA8,HSPB1,VCP,HSP90AB1,HYOU1,FN1,ANXA1,GDF15,ANXA4,WNT7A,ANXA5,OLFM4,ST6GAL1,APOH,YWHAB,YWHAE,YWHAG,YWHAH,YWHAZ,ARF4,PPP2R1A,IGF2R,RUVBL1,CST3,DNAJC5,SMPD1,CTSB,CTSH,DNAJC3,IL6ST,SOD1,LGMN,ACE,TMBIM1,B4GALT1,PTN,PTPRF,GLO1,YWHAQ,NME2,SFN,PNP,GPI,ITCH,PDCD6,CALR,ARHGEF12,NCSTN,PRDX2,TMBIM6,LDHA,PDIA3,GSN,L…
GO: Biological Process	GO:0012501	programmed cell death		3.079e-10	3.26e-08	99	1952	AARS,HSP90B1,CFL1,PARK7,ACTN1,UBA52,CLU,UBE2V2,AGT,PIP,PKM,ALB,ALDH1A1,MMP2,PRDX5,ITM2B,HSPA1A,HSPA5,HSPA8,HSPB1,VCP,ALOX15B,HSP90AA1,HSP90AB1,HYOU1,FN1,ANXA1,GDF15,ANXA4,WNT7A,ANXA5,OLFM4,ST6GAL1,APOH,APP,YWHAB,YWHAE,YWHAG,YWHAH,YWHAZ,ARF4,PPP2R1A,IGF2R,RUVBL1,CST3,DNAJC5,SMPD1,CTSB,CTSH,CTSL,DNAJC3,IL6ST,SOD1,LGMN,GAPDH,ACE,TMBIM1,B4GALT1,PTN,PTPRF,GLO1,YWHAQ,GNB1,NME2,DNASE2,SFN,PNP,GPI,ITCH,P…
GO: Biological Process	GO:0042981	regulation of apoptotic process		3.448e-10	3.585e-08	83	1519	AARS,HSP90B1,CFL1,PARK7,ACTN1,UBA52,CLU,UBE2V2,AGT,PIP,ALB,ALDH1A1,MMP2,PRDX5,HSPA1A,HSPA5,HSPA8,HSPB1,VCP,HSP90AB1,HYOU1,FN1,ANXA1,GDF15,ANXA4,WNT7A,ANXA5,OLFM4,ST6GAL1,APOH,YWHAB,YWHAE,YWHAG,YWHAH,YWHAZ,ARF4,PPP2R1A,IGF2R,RUVBL1,DNAJC5,SMPD1,CTSB,CTSH,DNAJC3,IL6ST,SOD1,LGMN,ACE,TMBIM1,B4GALT1,PTN,PTPRF,GLO1,YWHAQ,NME2,SFN,PNP,GPI,ITCH,PDCD6,CALR,ARHGEF12,NCSTN,PRDX2,TMBIM6,LDHA,PDIA3,GSN,LEFTY2…
GO: Biological Process	GO:0009725	response to hormone		3.657e-10	3.735e-08	64	1033	ACR,PARK7,SERPINF1,SERPINA1,UCHL3,AGT,PKM,ALAD,MMP2,BAIAP2,PLOD1,HSP90AA1,ANG,FN1,ADAMTS1,ANXA1,ANXA2,ANXA3,WNT7A,ANXA5,APOA1,MSI1,IDH1,APRT,YWHAG,YWHAH,ARSA,IGFBP5,PLPP1,PRCP,PRKAR2A,CTSB,CTSH,PTGES3,CTSL,SORD,ATP6V1A,GC,PTGDS,STEAP2,CFB,PTN,GGH,RAB10,PTPRF,C3,GNB1,GNB2,GOT1,CA2,PLOD3,CALM1,CALR,LDHA,GSTM3,GSTP1,TGFBR3,THBS1,EEF2,NAMPT,TIMP1,TIMP2,LMO2,CD38
GO: Biological Process	GO:0031347	regulation of defense response		4.192e-10	4.208e-08	55	820	A2M,HSP90B1,PARK7,SERPINF1,REG3G,MDH1,PGC,UBA52,AGT,HPX,PLA2G2A,MMP2,HSPA1A,HSP90AB1,VTN,ANXA1,ANXA5,APCS,APOA1,APOD,CFI,CHID1,CTSB,CTSL,IL6ST,LGMN,ERAP1,PSMA2,PSMA4,PSMA5,PSMA6,B2M,PSMB1,PSMB2,PSMB3,PSMC3,PSMC4,PSMD5,PSME1,ACE,CFB,GGT1,SERPING1,C3,C4A,NOV,ITCH,LAMP1,GSTP1,CD14,LPL,TSPAN6,CD59,IL1RL1,LTF
GO: Biological Process	GO:0005996	monosaccharide metabolic process		4.525e-10	4.465e-08	31	313	MAN2A1,MAN2B1,AKR1A1,MDH1,PGAM1,PGD,PGK1,PGM1,FBP1,PKM,ALDH1A1,ALDOA,APOD,PPP1CB,IGFBP4,IGFBP5,FUCA1,FUCA2,FUT5,GAA,SORD,GALM,GAPDH,FBP2,B4GALT1,GLB1,GOT1,GPI,LDHA,ENO1,TPI1
GO: Biological Process	GO:0006897	endocytosis		5.395e-10	5.235e-08	48	665	HSP90B1,ACTB,TSG101,IGLL5,SPON2,HPX,ALB,BAIAP2,HSPA8,SDCBP,CAP1,HSP90AA1,HSP90AB1,EZR,VTN,HYOU1,ANXA1,ANXA2,ANXA3,ANXA11,OLFM4,APOA1,APP,CFI,IGF2R,RAB21,MYO6,B2M,STEAP2,RAB7A,C3,C4A,RAB1A,RAB27A,CALR,SYT7,TF,GSN,LGALS3BP,TSPAN1,THBS1,CD9,CD14,TMPRSS2,CD81,VPS28,CDC42,SPACA3
GO: Biological Process	GO:0006915	apoptotic process		6.53e-10	6.154e-08	97	1923	AARS,HSP90B1,CFL1,PARK7,ACTN1,UBA52,CLU,UBE2V2,AGT,PIP,ALB,ALDH1A1,MMP2,PRDX5,ITM2B,HSPA1A,HSPA5,HSPA8,HSPB1,VCP,ALOX15B,HSP90AA1,HSP90AB1,HYOU1,FN1,ANXA1,GDF15,ANXA4,WNT7A,ANXA5,OLFM4,ST6GAL1,APOH,APP,YWHAB,YWHAE,YWHAG,YWHAH,YWHAZ,ARF4,PPP2R1A,IGF2R,RUVBL1,DNAJC5,SMPD1,CTSB,CTSH,CTSL,DNAJC3,IL6ST,SOD1,LGMN,GAPDH,ACE,TMBIM1,B4GALT1,PTN,PTPRF,GLO1,YWHAQ,GNB1,NME2,DNASE2,SFN,PNP,GPI,ITCH,PDCD6IP,PD…
GO: Biological Process	GO:0043171	peptide catabolic process		6.553e-10	6.154e-08	10	26	CPQ,TPP1,ANPEP,CPE,XPNPEP1,CTSH,ERAP1,ACE,GGT1,LNPEP
GO: Biological Process	GO:0040011	locomotion		7.766e-10	7.129e-08	90	1735	HEXB,CFL1,MATN2,SERPINF1,PFN1,ADAM10,EFEMP1,SPON2,AGT,MMP2,HSPA1A,HSPA5,SDCBP,HSPB1,VCL,CAP1,ALOX15B,HSP90AA1,EZR,SEMG1,SEMG2,SEMA3C,VTN,FMOD,ANG,FN1,ANPEP,ANXA1,ANXA3,WNT7A,ANXA5,OLFM4,APCS,APOA1,ST6GAL1,PODXL2,APOD,APOH,APP,PPIA,YWHAE,ARF4,RHOC,IGFBP5,PLPP1,PRCP,FUCA2,CTSB,CTSH,IL6ST,SORD,SPOCK1,RAB11A,ACE,IQGAP1,B4GALT1,PTN,PTPRF,F11R,GLG1,KIF5B,RAB1A,NOV,GPC1,DPP4,ITCH,PDCD6,CD177,CALR,LAMA5,…
GO: Biological Process	GO:0006955	immune response		7.837e-10	7.129e-08	84	1572	A2M,HSP90B1,ACTB,REG3G,CRISP3,PGC,IGLL5,UBA52,PIGR,CLU,SPON2,HPX,MMP2,BAIAP2,HSPA1A,HSPA8,HSP90AA1,HSP90AB1,EZR,SEMG1,SEMG2,SEMA3C,VTN,ANG,ANXA1,ANXA3,OLFM4,APCS,APOA1,ST6GAL1,APP,KLK3,CFI,YWHAZ,SLPI,CHID1,CTSB,CTSH,CTSL,IL6ST,LGMN,GAPDH,ERAP1,PSMA2,AZGP1,PSMA4,PSMA5,PSMA6,B2M,PSMB1,PSMB2,PSMB3,PSMC3,PSMC4,PSMD5,PSME1,CFB,SERPING1,C3,C4A,RAB27A,PNP,GP2,GPI,DPP4,ITCH,CALM1,CAMP,CAPZA1,LAMP1,LCN2,L…
GO: Biological Process	GO:0042592	homeostatic process		8.838e-10	7.917e-08	91	1767	HEXB,EPHX2,HSP90B1,ACO1,SERPINF1,ACTB,TXN,CKB,PIGR,LIPG,TPP1,CLN5,AGT,PIP,HPX,TXNDC16,ALB,FH,PRDX5,ALDOA,HSPA1A,HSPB1,ANG,FN1,ANPEP,ANXA1,ANXA7,RAB3D,CP,APLP2,APOA1,CCT2,NPC2,APP,CLSTN1,CARTPT,IGFBP5,CCT5,PRCP,CST4,PRKAR2A,CTSH,PTGES3,MUC6,IL6ST,GAA,SOD1,ATP6V1A,AZGP1,B2M,RAB11A,DBI,STEAP2,QSOX1,TEX101,RAB7A,KIF5B,GNB1,DNASE2,GOT1,CA2,NOV,CA4,SFN,GPI,CACNA2D1,CALM1,CALR,CAMP,STEAP4,LAMP2,NCSTN,PR…
GO: Biological Process	GO:0019674	NAD metabolic process		9.703e-10	8.559e-08	14	63	MDH1,PGAM1,PGK1,PKM,ALDOA,VCP,GAPDH,PNP,GPI,LDHA,LDHB,NAMPT,ENO1,TPI1
GO: Biological Process	GO:0048002	antigen processing and presentation of peptide antigen		1.063e-09	9.236e-08	23	185	CTSD,CTSL,LGMN,CTSF,ERAP1,PSMA2,AZGP1,PSMA4,PSMA5,PSMA6,B2M,PSMB1,PSMB2,PSMB3,PSMC3,PSMC4,PSMD5,PSME1,ACE,RAB7A,CALR,PDIA3,LNPEP
GO: Biological Process	GO:0072524	pyridine-containing compound metabolic process		1.168e-09	1e-07	21	155	MDH1,PGAM1,PGD,PGK1,PGM1,FBP1,PKM,PGLS,PRDX5,ALDOA,NAXE,VCP,IDH1,GAPDH,PNP,GPI,LDHA,LDHB,NAMPT,ENO1,TPI1
GO: Biological Process	GO:0019320	hexose catabolic process		1.341e-09	1.131e-07	13	54	PGAM1,PGK1,PGM1,PKM,ALDH1A1,ALDOA,FUT5,GAPDH,GLB1,GPI,LDHA,ENO1,TPI1
GO: Biological Process	GO:0006954	inflammatory response		1.664e-09	1.384e-07	49	711	A2M,EPHX2,PARK7,SERPINF1,REG3G,SERPINA1,PLAA,AGT,PLA2G2A,PRDX5,SERPINF2,ATRN,VTN,FN1,ANXA1,APCS,APOA1,APOD,KLK3,CFI,YWHAZ,IGFBP4,PRCP,CHID1,IL6ST,PSMA6,ACE,CFB,GGT1,B4GALT1,F11R,SERPING1,C3,C4A,NOV,ITCH,CAMP,PRDX2,ECM1,GSTP1,ORM1,ORM2,THBS1,LIPA,CD14,LPL,CD59,IL1RL1,LYZ
GO: Biological Process	GO:0046496	nicotinamide nucleotide metabolic process		2.116e-09	1.711e-07	20	145	MDH1,PGAM1,PGD,PGK1,PGM1,FBP1,PKM,PGLS,PRDX5,ALDOA,VCP,IDH1,GAPDH,PNP,GPI,LDHA,LDHB,NAMPT,ENO1,TPI1
GO: Biological Process	GO:0019362	pyridine nucleotide metabolic process		2.116e-09	1.711e-07	20	145	MDH1,PGAM1,PGD,PGK1,PGM1,FBP1,PKM,PGLS,PRDX5,ALDOA,VCP,IDH1,GAPDH,PNP,GPI,LDHA,LDHB,NAMPT,ENO1,TPI1
GO: Biological Process	GO:0048585	negative regulation of response to stimulus		4.025e-09	3.21e-07	80	1518	A2M,PARK7,SERPINF1,CD109,TXN,UBA52,FBP1,CLU,AGT,SERPINF2,HSPA1A,HSPA5,HSPB1,EZR,SEMA3C,VTN,HYOU1,ANXA1,ANXA2,ANXA5,OLFM4,APCS,APOA1,ST6GAL1,APOD,APOH,YWHAB,ZFYVE28,CARTPT,PPP2R1A,IGFBP4,IGFBP5,SMPD1,CHID1,DNAJC3,IL6ST,LGMN,PSAP,PSMA2,PSMA4,PSMA5,PSMA6,PSMB1,PSMB2,PSMB3,PSMC3,PSMC4,PSMD5,PSME1,TMBIM1,QSOX1,PTPRF,GLG1,SERPING1,RAB7A,OS9,TWSG1,NOV,GPC1,ITCH,PDCD6,CALM1,CALR,CORO1B,PRDX2,TMBIM6,ECM1,…
GO: Biological Process	GO:0006928	movement of cell or subcellular component		4.534e-09	3.567e-07	93	1882	HEXB,CFL1,MATN2,SERPINF1,ACTB,ACTN1,PFN1,ADAM10,TXN,EFEMP1,SPON2,AGT,MMP2,HSPA5,SDCBP,HSPB1,VCL,CAP1,ALOX15B,HSP90AA1,EZR,SEMG1,SEMG2,SEMA3C,VTN,FMOD,ANG,FN1,ANXA1,ANXA3,WNT7A,ANXA5,OLFM4,APOA1,PODXL2,APOD,APOH,APP,PPIA,YWHAE,ARF4,RHOC,IGFBP5,PLPP1,PRCP,LYPD3,RAB21,CTSH,IL6ST,SOD1,SORD,MYL6,MYO6,SPOCK1,RAB11A,ACE,IQGAP1,B4GALT1,PTN,PTPRF,F11R,GLG1,KIF5B,RAB1A,NOV,GPC1,DPP4,CACNA2D1,DSC2,PDCD6,CD1…
GO: Biological Process	GO:0060548	negative regulation of cell death		4.794e-09	3.721e-07	60	1001	AARS,HSP90B1,CFL1,PARK7,SERPINF1,TXN,UBA52,CLU,UBE2V2,AGT,PIP,ALB,PRDX5,HSPA1A,HSPA5,HSPA8,HSPB1,HSP90AB1,HYOU1,FN1,ANXA1,ANXA4,WNT7A,ANXA5,AGR2,ST6GAL1,APOH,YWHAE,YWHAH,YWHAZ,ARF4,CST3,DNAJC5,CTSB,CTSH,PTGES3,DNAJC3,IL6ST,SOD1,LGMN,PSAP,TMBIM1,GLO1,NME2,NOV,SFN,PNP,GPI,ITCH,PRDX2,TMBIM6,GSTP1,TGFBR3,LIFR,THBS1,TIMP1,CD38,EIF5A,CD59,LTF
GO: Biological Process	GO:0001894	tissue homeostasis		6.866e-09	5.26e-07	25	238	ACTB,PIGR,TPP1,PIP,ALB,FH,PRDX5,HSPB1,RAB3D,CARTPT,CST4,CTSH,MUC6,SOD1,AZGP1,B2M,RAB7A,CA2,LCN1,TF,LIPA,CD38,PRDX1,LTF,LYZ
GO: Biological Process	GO:0051336	regulation of hydrolase activity		7.965e-09	6.022e-07	74	1379	A2M,HSP90B1,PARK7,SERPINF1,CD109,PFN1,SERPINA1,SERPINA4,WFDC2,AGT,ARHGAP29,ALDH1A1,PRDX5,SERPINF2,HSPA1A,HSPA2,HSPA5,VCP,SEMG1,SEMG2,VTN,ANG,FN1,ANXA1,APCS,APLP2,APOA1,APOH,APP,YWHAE,DIS3,ARF4,RHOC,PPP2R1A,CST1,SLPI,CST3,CST4,CTSH,SOD1,CPAMD8,SPINK2,SPINT1,SPOCK1,SPINT3,PSME1,GDI2,IQGAP1,F11R,SPOCK3,SERPING1,GM2A,C3,C4A,RAB3A,SFN,GPI,PDCD6,CALM1,DOCK9,ARHGEF12,LCN1,TMBIM6,ECM1,PI15,GSN,THBS1,TIMP…
GO: Biological Process	GO:0006959	humoral immune response		8.548e-09	6.334e-07	24	223	A2M,PGC,IGLL5,CLU,SPON2,HPX,SEMG1,SEMG2,VTN,ANG,ST6GAL1,APP,KLK3,CFI,SLPI,B2M,CFB,SERPING1,C3,C4A,GPI,CAMP,CD59,LTF
GO: Biological Process	GO:1990267	response to transition metal nanoparticle		8.594e-09	6.334e-07	20	157	AOC1,ACO1,PARK7,ALAD,ALB,HSPA5,FN1,CP,ARSA,SOD1,SOD3,SORD,B2M,GGH,GLRA2,ADIRF,CA2,NUCB1,TF,GSTP1
GO: Biological Process	GO:0006733	oxidoreduction coenzyme metabolic process		9.598e-09	6.985e-07	20	158	MDH1,PGAM1,PGD,PGK1,PGM1,FBP1,PKM,PGLS,PRDX5,ALDOA,VCP,IDH1,GAPDH,PNP,GPI,LDHA,LDHB,NAMPT,ENO1,TPI1
GO: Biological Process	GO:0002526	acute inflammatory response		1.071e-08	7.697e-07	20	159	A2M,REG3G,SERPINA1,SERPINF2,VTN,FN1,APCS,KLK3,CFI,PRCP,IL6ST,CFB,B4GALT1,SERPING1,C3,C4A,GSTP1,ORM1,ORM2,CD59
GO: Biological Process	GO:0002253	activation of immune response		1.113e-08	7.903e-07	39	525	A2M,HSP90B1,ACTB,REG3G,IGLL5,UBA52,CLU,BAIAP2,HSPA1A,HSP90AA1,HSP90AB1,EZR,VTN,CFI,CTSB,CTSL,LGMN,PSMA2,PSMA4,PSMA5,PSMA6,PSMB1,PSMB2,PSMB3,PSMC3,PSMC4,PSMD5,PSME1,CFB,SERPING1,C3,C4A,ITCH,CD14,CD38,TSPAN6,CD59,LTF,CDC42
GO: Biological Process	GO:0022603	regulation of anatomical structure morphogenesis		1.174e-08	8.234e-07	64	1128	HEXB,DDAH1,CFL1,SERPINF1,PFN1,LRG1,UBA52,BASP1,AGT,BAIAP2,ALDOA,SDCBP,HSPB1,EZR,SEMA3C,FMOD,WARS,FN1,ADAMTS1,ANXA1,GDF15,ANXA3,WNT7A,ANXA7,OLFM4,APOA1,ST6GAL1,CPE,APOH,KLK3,YWHAH,CST3,RAB21,CTSH,ERAP1,PSMA2,PSMA4,PSMA5,PSMA6,PSMB1,PSMB2,PSMB3,RAB11A,PSMC3,PSMC4,PSMD5,PSME1,TMBIM1,B4GALT1,PTN,PTPRF,C3,PDCD6,CALR,CAMP,CORO1B,ECM1,GSN,TGFBR3,THBS1,RNH1,CDC42,CDH1,AGRN
GO: Biological Process	GO:0002684	positive regulation of immune system process		1.209e-08	8.382e-07	58	976	A2M,HSP90B1,ACTB,REG3G,ADAM10,PGC,IGLL5,UBA52,CLU,SPON2,HPX,MMP2,BAIAP2,HSPA1A,HSPA8,HSP90AA1,HSP90AB1,EZR,VTN,ANXA1,CFI,CTSB,CTSL,IL6ST,LGMN,PSMA2,PSMA4,PSMA5,PSMA6,B2M,PSMB1,PSMB2,PSMB3,PSMC3,PSMC4,PSMD5,PSME1,CFB,TEX101,SERPING1,C3,C4A,CA2,PNP,DPP4,ITCH,CALR,LAMP1,THBS1,CD14,CD38,TSPAN6,CD59,CD81,IL1RL1,LTF,CDC42,SPACA3
GO: Biological Process	GO:0006734	NADH metabolic process		1.265e-08	8.65e-07	11	43	MDH1,PGAM1,PGK1,PKM,ALDOA,VCP,GAPDH,GPI,LDHA,ENO1,TPI1
GO: Biological Process	GO:0044283	small molecule biosynthetic process		1.278e-08	8.65e-07	41	572	ACLY,PARK7,AKR1A1,MDH1,PGAM1,PGD,PGK1,PGM1,FASN,FBP1,AGT,UGDH,UGP2,PKM,ALDH1A1,ALDOA,PLOD1,ALOX15B,FOLH1,ANXA1,APOA1,PTGES3,SOD1,SORD,IMPA1,GAPDH,FBP2,PTGDS,PHGDH,GGT1,GOT1,PNP,GPI,SLC44A4,LDHA,LDHB,CBR1,LDHC,LPL,ENO1,TPI1
GO: Biological Process	GO:0051130	positive regulation of cellular component organization		1.352e-08	9.046e-07	69	1263	CFL1,PARK7,SERPINF1,TSG101,PFN1,EFEMP1,CLU,UBE2V2,AGT,BAIAP2,SERPINF2,HSPA8,SDCBP,VCP,HSP90AA1,EZR,VTN,FN1,ADAMTS1,ANXA1,GDF15,ANXA2,WNT7A,AGR2,OLFM4,APOA1,CCT2,CLSTN1,YWHAB,YWHAE,YWHAG,YWHAH,YWHAZ,RUVBL1,CCT5,RAB21,CAND1,B2M,RAB11A,PSMC3,PSMC4,IQGAP1,PTN,NEU1,PTPRF,C3,C4A,KIF5B,YWHAQ,NME2,RAB27A,SFN,PDCD6IP,CALR,CORO1B,LCN2,LCP1,VPS37B,TF,GSN,TSPAN1,CCT6A,CD14,PEBP1,EIF5A,VPS28,CDC42,AGRN,SPACA3
GO: Biological Process	GO:0060249	anatomical structure homeostasis		1.44e-08	9.526e-07	33	402	ACTB,PIGR,TPP1,PIP,ALB,FH,PRDX5,ALDOA,HSPA1A,HSPB1,RAB3D,CCT2,CARTPT,CCT5,CST4,CTSH,PTGES3,MUC6,GAA,SOD1,AZGP1,B2M,RAB7A,CA2,LAMP2,LCN1,TF,CCT6A,LIPA,CD38,PRDX1,LTF,LYZ
GO: Biological Process	GO:0070613	regulation of protein processing		1.905e-08	1.246e-06	15	91	A2M,SERPINF2,VTN,CFI,RUVBL1,CFB,GLG1,SERPING1,C3,C4A,GSN,THBS1,CD59,CLEC3B,CDH1
GO: Biological Process	GO:1903034	regulation of response to wounding		2.126e-08	1.375e-06	36	472	A2M,PARK7,SERPINF1,CD109,REG3G,AGT,PLA2G2A,SERPINF2,VTN,ANXA1,ANXA2,ANXA5,APCS,APOA1,APOD,APOH,CFI,CHID1,IL6ST,PSMA6,ACE,CFB,GGT1,PTPRF,SERPING1,C3,C4A,NOV,PRDX2,GSN,GSTP1,THBS1,LPL,TSPAN8,CD59,IL1RL1
GO: Biological Process	GO:0001895	retina homeostasis		2.177e-08	1.375e-06	14	79	ACTB,PIGR,PIP,ALB,HSPB1,CST4,SOD1,AZGP1,B2M,LCN1,TF,PRDX1,LTF,LYZ
GO: Biological Process	GO:0007599	hemostasis		2.197e-08	1.375e-06	31	368	A2M,ACTB,ACTN1,SERPINA1,CLIC1,SERPINF2,HSPB1,VCL,VTN,ANXA2,ANXA5,ANXA7,APOH,YWHAZ,PRCP,PRKAR2A,SERPING1,C3,GNB1,RAB27A,GPI,CD177,DOCK9,CAPZA1,PRDX2,THBS1,CD9,TSPAN8,CD59,CDC42,SERPINA5
GO: Biological Process	GO:0050817	coagulation		2.197e-08	1.375e-06	31	368	A2M,ACTB,ACTN1,SERPINA1,CLIC1,SERPINF2,HSPB1,VCL,SEMG1,SEMG2,VTN,ANXA2,ANXA5,APOH,YWHAZ,PRCP,PRKAR2A,SERPING1,C3,GNB1,RAB27A,CD177,DOCK9,CAPZA1,PRDX2,THBS1,CD9,TSPAN8,CD59,CDC42,SERPINA5
GO: Biological Process	GO:1903317	regulation of protein maturation		2.221e-08	1.375e-06	15	92	A2M,SERPINF2,VTN,CFI,RUVBL1,CFB,GLG1,SERPING1,C3,C4A,GSN,THBS1,CD59,CLEC3B,CDH1
GO: Biological Process	GO:0035966	response to topologically incorrect protein		2.626e-08	1.592e-06	21	184	AARS,HSP90B1,DNAJB9,CLU,TPP1,HSPA1A,HSPA2,HSPA5,HSPA6,HSPA8,HSPB1,VCP,HSP90AA1,HSP90AB1,HYOU1,HSPA4L,AGR2,DNAJC3,CALR,TMBIM6,THBS1
GO: Biological Process	GO:1901136	carbohydrate derivative catabolic process		2.626e-08	1.592e-06	21	184	HEXA,HEXB,MANBA,HPRT1,FMOD,CST3,CTBS,CHID1,FUCA1,FUCA2,GALNS,NAGLU,NEU1,GLA,GLB1,GM2A,GNS,PNP,GPC1,AGRN,SPACA3
GO: Biological Process	GO:0006026	aminoglycan catabolic process		2.691e-08	1.599e-06	13	68	HEXA,HEXB,FMOD,CTBS,CHID1,FUCA1,GALNS,NAGLU,GLB1,GNS,GPC1,AGRN,SPACA3
GO: Biological Process	GO:0042590	antigen processing and presentation of exogenous peptide antigen via MHC class I		2.691e-08	1.599e-06	13	68	PSMA2,PSMA4,PSMA5,PSMA6,B2M,PSMB1,PSMB2,PSMB3,PSMC3,PSMC4,PSMD5,PSME1,LNPEP
GO: Biological Process	GO:0051050	positive regulation of transport		3.982e-08	2.342e-06	60	1061	ACAT2,PARK7,TSG101,LIPG,AGT,HSPA2,HSPA8,SDCBP,ALOX15B,HSP90AA1,HSP90AB1,EZR,VTN,ANG,ANXA1,ANXA2,RAB3D,PPIA,YWHAB,YWHAE,YWHAG,YWHAH,YWHAZ,CARTPT,RUVBL1,RAB21,PRSS8,B2M,DBI,TEX101,RAB7A,C3,C4A,KIF5B,YWHAQ,RAB3A,RAB3B,RAB27A,RAB27B,CA2,SFN,CACNA2D1,PDCD6IP,CALM1,CALR,CAMP,LAMP1,VPS37B,SYT7,TF,TSPAN1,CD14,PAEP,LPL,CD38,IL1RL1,VPS28,CDC42,CDH1,SPACA3
GO: Biological Process	GO:0071495	cellular response to endogenous stimulus		4.878e-08	2.84e-06	68	1278	HSP90B1,AOC1,PARK7,SERPINF1,CD109,LRG1,UBA52,UCHL3,AGT,MMP2,BAIAP2,PLOD1,HSPA5,SDCBP,EZR,FMOD,FN1,ADAMTS1,ANXA1,GDF15,WNT7A,ANXA5,APOA1,APP,APRT,YWHAG,YWHAH,IGFBP5,PLPP1,PRCP,PRKAR2A,CTSB,CTSH,PTGES3,CTSL,SOD1,ATP6V1A,SPINT1,IQGAP1,PTN,RAB10,PTPRF,F11R,GLG1,GLRA2,TWSG1,GNB1,GNB2,GOT1,CA2,GPC1,RAP1B,PLOD3,CALR,CORO1B,LEFTY2,GSTP1,TGFBR3,THBS1,EEF2,NAMPT,FSTL1,CD9,LMO2,CD81,CLEC3B,IL1RL1,CDH1
GO: Biological Process	GO:0044257	cellular protein catabolic process		4.939e-08	2.847e-06	45	694	HSP90B1,ACR,PARK7,TSG101,DNAJB9,UBA52,UBA1,MVB12A,CLU,UBE2V2,UCHL3,CPVL,HSPA5,SDCBP,VCP,HSP90AB1,EZR,ANXA2,VPS25,CTSB,CTSH,CTSL,DNAJC3,CTSZ,LGMN,CTSF,PSMA2,PSMA4,PSMA5,PSMA6,PSMB1,PSMB2,PSMB3,PSMC3,PSMC4,PSMD5,PSME1,RAB7A,OS9,ITCH,PDCD6IP,USP5,SCPEP1,CD81,VPS28
GO: Biological Process	GO:0006986	response to unfolded protein		5.005e-08	2.857e-06	20	174	AARS,HSP90B1,DNAJB9,TPP1,HSPA1A,HSPA2,HSPA5,HSPA6,HSPA8,HSPB1,VCP,HSP90AA1,HSP90AB1,HYOU1,HSPA4L,AGR2,DNAJC3,CALR,TMBIM6,THBS1
GO: Biological Process	GO:0031349	positive regulation of defense response		6.128e-08	3.464e-06	33	427	HSP90B1,REG3G,PGC,UBA52,AGT,HPX,PLA2G2A,MMP2,HSPA1A,CTSB,CTSL,IL6ST,LGMN,PSMA2,PSMA4,PSMA5,PSMA6,PSMB1,PSMB2,PSMB3,PSMC3,PSMC4,PSMD5,PSME1,ACE,C3,ITCH,LAMP1,CD14,LPL,TSPAN6,IL1RL1,LTF
GO: Biological Process	GO:0006575	cellular modified amino acid metabolic process		6.214e-08	3.479e-06	24	247	DDAH1,PARK7,CKB,FASN,CPQ,PLA1A,CLIC1,PLA2G2A,PLOD1,FOLH1,IDH1,CRYM,CNDP2,SOD1,GGT1,GGH,GLO1,GPX3,GSS,GSTM3,GSTP1,GSTT2,EEF1G,P4HB
GO: Biological Process	GO:0043488	regulation of mRNA stability		6.428e-08	3.564e-06	18	144	UBA52,HSPA1A,HSPA8,HSPB1,YWHAB,DIS3,YWHAZ,PSMA2,PSMA4,PSMA5,PSMA6,PSMB1,PSMB2,PSMB3,PSMC3,PSMC4,PSMD5,PSME1
GO: Biological Process	GO:0006518	peptide metabolic process		6.552e-08	3.598e-06	51	847	RIDA,AARS,RPLP1,ACO1,UBA52,CPQ,CLU,CLIC1,TPP1,CLN5,AGT,MME,HSPB1,ANG,WARS,ANPEP,APEH,CPD,CPE,CPZ,XPNPEP1,CPM,IDH1,APP,KLK3,IGFBP5,CNDP2,CTSH,DNAJC3,CTSZ,SOD1,GAPDH,ERAP1,GARS,ACE,GGT1,GLO1,PTCD3,FAM129A,CALR,GPX3,NCSTN,GSS,GSTM3,GSTP1,GSTT2,THBS1,EEF1G,EEF2,LNPEP,EIF5A
GO: Biological Process	GO:0036257	multivesicular body organization		8.175e-08	4.448e-06	9	31	TSG101,MVB12A,VPS25,RAB11A,RAB27A,VPS37C,PDCD6IP,VPS37B,VPS28
GO: Biological Process	GO:0043487	regulation of RNA stability		9.834e-08	5.301e-06	18	148	UBA52,HSPA1A,HSPA8,HSPB1,YWHAB,DIS3,YWHAZ,PSMA2,PSMA4,PSMA5,PSMA6,PSMB1,PSMB2,PSMB3,PSMC3,PSMC4,PSMD5,PSME1
GO: Biological Process	GO:0009308	amine metabolic process		1.134e-07	6.057e-06	22	218	AOC1,PARK7,HPRT1,PLA2G2A,APOA1,SMPD1,SMS,PSMA2,PSMA4,PSMA5,PSMA6,PSMB1,PSMB2,PSMB3,PSMC3,PSMC4,PSMD5,DBI,PSME1,SMPDL3A,SLC44A4,PEBP1
GO: Biological Process	GO:0002479	antigen processing and presentation of exogenous peptide antigen via MHC class I, TAP-dependent		1.161e-07	6.145e-06	12	64	PSMA2,PSMA4,PSMA5,PSMA6,B2M,PSMB1,PSMB2,PSMB3,PSMC3,PSMC4,PSMD5,PSME1
GO: Biological Process	GO:0038061	NIK/NF-kappaB signaling		1.246e-07	6.538e-06	16	119	UBA52,AGT,EZR,PSMA2,PSMA4,PSMA5,PSMA6,PSMB1,PSMB2,PSMB3,PSMC3,PSMC4,PSMD5,PSME1,CALR,TSPAN6
GO: Biological Process	GO:0040012	regulation of locomotion		1.312e-07	6.806e-06	51	866	SERPINF1,PFN1,ADAM10,EFEMP1,AGT,MMP2,HSPA5,SDCBP,HSPB1,VCL,ALOX15B,SEMG1,SEMG2,SEMA3C,VTN,FN1,ANXA1,ANXA3,WNT7A,ANXA5,OLFM4,APCS,ST6GAL1,APOD,APOH,IGFBP5,PRCP,FUCA2,CTSH,IL6ST,RAB11A,ACE,IQGAP1,PTN,NOV,PDCD6,CALR,LAMA5,CORO1B,ECM1,TF,GSN,TGFBR3,COL18A1,THBS1,TIMP1,P4HB,TMPRSS2,CD81,CDH1,AGRN
GO: Biological Process	GO:0031099	regeneration		1.329e-07	6.806e-06	21	202	MATN2,CPQ,PKM,MMP2,VTN,ANXA1,ANXA3,WNT7A,APOA1,APOD,APOH,IGF2R,ACE,PTPRF,NOV,LAMB2,LCP1,GSN,GSTP1,TGFBR3,LIFR
GO: Biological Process	GO:0016051	carbohydrate biosynthetic process		1.333e-07	6.806e-06	22	220	AKR1A1,MDH1,PGAM1,PGD,PGK1,PGM1,UBA52,FBP1,UGP2,ALDOA,PPP1CB,PTGES3,SORD,IMPA1,GAPDH,FBP2,B4GALT1,GOT1,GPI,NANS,ENO1,TPI1
GO: Biological Process	GO:0060627	regulation of vesicle-mediated transport		1.349e-07	6.828e-06	36	508	TSG101,MVB12A,CRISP1,HSPA8,SDCBP,EZR,VTN,ANXA1,ANXA2,OLFM4,RAB3D,RAB21,SPINK2,B2M,RAB11A,B4GALT1,RAB7A,C3,C4A,KIF5B,RAB3A,RAB3B,RAB27A,RAB27B,RAP1B,PDCD6IP,CALR,LAMP1,VPS37B,SYT7,TF,TSPAN1,CD14,VPS28,SYTL1,SPACA3
GO: Biological Process	GO:0001525	angiogenesis		1.383e-07	6.909e-06	34	464	DDAH1,SERPINF1,LRG1,AGT,MMP2,HSPB1,ANG,WARS,FN1,ANPEP,ADAMTS1,ANXA2,ANXA3,WNT7A,APOD,APOH,KLK3,PRCP,CTSH,ERAP1,ACE,B4GALT1,PTN,C3,NOV,GPI,PDCD6,CAMP,LAMA5,ECM1,COL18A1,THBS1,RNH1,CDC42
GO: Biological Process	GO:0048871	multicellular organismal homeostasis		1.389e-07	6.909e-06	30	378	ACTB,PIGR,TPP1,PIP,ALB,FH,PRDX5,HSPB1,RAB3D,CARTPT,PRCP,CST4,PRKAR2A,CTSH,MUC6,SOD1,AZGP1,B2M,RAB11A,RAB7A,CA2,SFN,LCN1,TF,LIPA,CD38,PRDX1,LTF,LYZ,CDH1
GO: Biological Process	GO:0006007	glucose catabolic process		1.491e-07	7.355e-06	9	33	PGAM1,PGK1,PKM,ALDOA,GAPDH,GPI,LDHA,ENO1,TPI1
GO: Biological Process	GO:0046364	monosaccharide biosynthetic process		1.556e-07	7.532e-06	15	106	AKR1A1,MDH1,PGAM1,PGD,PGK1,PGM1,FBP1,ALDOA,SORD,GAPDH,FBP2,GOT1,GPI,ENO1,TPI1
GO: Biological Process	GO:0045087	innate immune response		1.576e-07	7.532e-06	50	846	A2M,HSP90B1,REG3G,CRISP3,IGLL5,UBA52,CLU,SPON2,HPX,MMP2,HSPA1A,HSP90AB1,ANG,ANXA1,APCS,APP,CFI,SLPI,CHID1,CTSB,CTSL,LGMN,GAPDH,ERAP1,PSMA2,PSMA4,PSMA5,PSMA6,B2M,PSMB1,PSMB2,PSMB3,PSMC3,PSMC4,PSMD5,PSME1,CFB,SERPING1,C3,C4A,RAB27A,ITCH,CAMP,CAPZA1,LAMP1,LCN2,CD14,PRDX1,TSPAN6,LTF
GO: Biological Process	GO:0051674	localization of cell		1.578e-07	7.532e-06	72	1428	HEXB,CFL1,MATN2,SERPINF1,PFN1,ADAM10,EFEMP1,AGT,MMP2,HSPA5,SDCBP,HSPB1,VCL,CAP1,ALOX15B,HSP90AA1,SEMG1,SEMG2,SEMA3C,VTN,ANG,FN1,ANXA1,ANXA3,WNT7A,ANXA5,OLFM4,APOA1,PODXL2,APOD,APOH,PPIA,YWHAE,ARF4,RHOC,IGFBP5,PLPP1,PRCP,CTSH,IL6ST,SORD,SPOCK1,RAB11A,ACE,IQGAP1,B4GALT1,PTN,PTPRF,F11R,GLG1,RAB1A,NOV,DPP4,PDCD6,CD177,CALR,LAMA5,LAMC1,CORO1B,LCP1,ECM1,TF,LDHC,GSN,TSPAN1,TGFBR3,COL18A1,THBS1,TIMP1,CD8…
GO: Biological Process	GO:0048870	cell motility		1.578e-07	7.532e-06	72	1428	HEXB,CFL1,MATN2,SERPINF1,PFN1,ADAM10,EFEMP1,AGT,MMP2,HSPA5,SDCBP,HSPB1,VCL,CAP1,ALOX15B,HSP90AA1,SEMG1,SEMG2,SEMA3C,VTN,ANG,FN1,ANXA1,ANXA3,WNT7A,ANXA5,OLFM4,APOA1,PODXL2,APOD,APOH,PPIA,YWHAE,ARF4,RHOC,IGFBP5,PLPP1,PRCP,CTSH,IL6ST,SORD,SPOCK1,RAB11A,ACE,IQGAP1,B4GALT1,PTN,PTPRF,F11R,GLG1,RAB1A,NOV,DPP4,PDCD6,CD177,CALR,LAMA5,LAMC1,CORO1B,LCP1,ECM1,TF,LDHC,GSN,TSPAN1,TGFBR3,COL18A1,THBS1,TIMP1,CD8…
GO: Biological Process	GO:0022617	extracellular matrix disassembly		1.601e-07	7.58e-06	14	92	A2M,ADAM10,MMP2,FN1,CST3,CTSL,KLK2,DPP4,LAMC1,LCP1,GSN,TIMP1,TIMP2,CDH1
GO: Biological Process	GO:0006520	cellular amino acid metabolic process		1.629e-07	7.649e-06	31	402	HGD,AARS,DDAH1,PARK7,CKB,FAH,PLOD1,WARS,FOLH1,CRYM,CNDP2,SMS,SPR,PSMA2,PSMA4,PSMA5,PSMA6,PSMB1,GARS,PSMB2,PSMB3,PSMC3,PSMC4,PSMD5,PSME1,PHGDH,GGT1,GGH,GOT1,GSS,P4HB
GO: Biological Process	GO:0006521	regulation of cellular amino acid metabolic process		1.657e-07	7.719e-06	12	66	PARK7,PSMA2,PSMA4,PSMA5,PSMA6,PSMB1,PSMB2,PSMB3,PSMC3,PSMC4,PSMD5,PSME1
GO: Biological Process	GO:0006790	sulfur compound metabolic process		1.819e-07	8.403e-06	31	404	HEXA,HEXB,ACLY,ESD,ACPP,AKR1A1,B4GALT5,TXN,FASN,CLIC1,FMOD,IDH1,CNDP2,SMS,SOD1,GALNS,PHGDH,GGT1,B4GALT1,GLB1,SPOCK3,BTD,GLO1,GNS,GPC1,GPX3,GSS,GSTM3,GSTP1,GSTT2,EEF1G
GO: Biological Process	GO:0050878	regulation of body fluid levels		1.907e-07	8.743e-06	37	538	A2M,ACTB,ACTN1,SERPINA1,CLIC1,SERPINF2,HSPB1,VCL,VTN,ANXA2,ANXA5,ANXA7,AGR2,APOH,APRT,YWHAZ,PRCP,PRKAR2A,RAB11A,GC,SERPING1,C3,GNB1,RAB27A,SFN,GPI,CD177,DOCK9,CAPZA1,PRDX2,THBS1,CD9,TSPAN8,CD59,CDC42,CDH1,SERPINA5
GO: Biological Process	GO:0007596	blood coagulation		1.958e-07	8.892e-06	29	363	A2M,ACTB,ACTN1,SERPINA1,CLIC1,SERPINF2,HSPB1,VCL,VTN,ANXA2,ANXA5,APOH,YWHAZ,PRCP,PRKAR2A,SERPING1,C3,GNB1,RAB27A,CD177,DOCK9,CAPZA1,PRDX2,THBS1,CD9,TSPAN8,CD59,CDC42,SERPINA5
GO: Biological Process	GO:0009311	oligosaccharide metabolic process		1.97e-07	8.892e-06	12	67	HEXB,MAN2A1,MAN2B1,MANBA,ST6GAL1,CTBS,GAA,GNPTG,B4GALT1,NEU1,GLA,GM2A
GO: Biological Process	GO:2000026	regulation of multicellular organismal development		2.09e-07	9.346e-06	88	1893	DDAH1,MAN2A1,CFL1,SERPINF1,CD109,REG3G,PFN1,LRG1,UBA52,EFEMP1,UBE2V2,BASP1,AGT,BAIAP2,HSPA5,SDCBP,HSPB1,ALOX15B,HSP90AA1,SEMA3C,FMOD,WARS,FN1,ADAMTS1,ANXA1,ANXA3,WNT7A,APCS,APOA1,CPE,APOH,APP,KLK3,CLSTN1,YWHAG,YWHAH,CARTPT,RAB21,CTSH,IL6ST,SOD1,SPINT1,SPOCK1,ERAP1,PSMA2,PSMA4,PSMA5,PSMA6,B2M,PSMB1,PSMB2,PSMB3,RAB11A,PSMC3,PSMC4,PSMD5,PSME1,ACE,IQGAP1,B4GALT1,PTN,NEU1,PTPRF,GLG1,C3,NME2,CA2,SFN,PN…
GO: Biological Process	GO:0033238	regulation of cellular amine metabolic process		2.109e-07	9.346e-06	14	94	PARK7,HPRT1,PSMA2,PSMA4,PSMA5,PSMA6,PSMB1,PSMB2,PSMB3,PSMC3,PSMC4,PSMD5,PSME1,PEBP1
GO: Biological Process	GO:0043066	negative regulation of apoptotic process		2.119e-07	9.346e-06	52	905	AARS,HSP90B1,CFL1,PARK7,UBA52,CLU,UBE2V2,AGT,PIP,ALB,PRDX5,HSPA1A,HSPA5,HSPA8,HSPB1,HSP90AB1,HYOU1,FN1,ANXA1,ANXA4,WNT7A,ANXA5,ST6GAL1,APOH,YWHAE,YWHAH,YWHAZ,ARF4,DNAJC5,CTSH,DNAJC3,IL6ST,SOD1,LGMN,TMBIM1,GLO1,NME2,SFN,PNP,GPI,ITCH,PRDX2,TMBIM6,GSTP1,TGFBR3,LIFR,THBS1,TIMP1,CD38,EIF5A,CD59,LTF
GO: Biological Process	GO:0006749	glutathione metabolic process		2.335e-07	1.014e-05	12	68	CLIC1,IDH1,CNDP2,SOD1,GGT1,GLO1,GPX3,GSS,GSTM3,GSTP1,GSTT2,EEF1G
GO: Biological Process	GO:0051444	negative regulation of ubiquitin-protein transferase activity		2.342e-07	1.014e-05	13	81	PARK7,UBA52,PSMA2,PSMA4,PSMA5,PSMA6,PSMB1,PSMB2,PSMB3,PSMC3,PSMC4,PSMD5,PSME1
GO: Biological Process	GO:0044106	cellular amine metabolic process		2.37e-07	1.014e-05	21	209	PARK7,HPRT1,PLA2G2A,APOA1,SMPD1,SMS,PSMA2,PSMA4,PSMA5,PSMA6,PSMB1,PSMB2,PSMB3,PSMC3,PSMC4,PSMD5,DBI,PSME1,SMPDL3A,SLC44A4,PEBP1
GO: Biological Process	GO:0051186	cofactor metabolic process		2.385e-07	1.014e-05	31	409	ACLY,MDH1,PGAM1,PGD,PGK1,PGM1,FASN,FBP1,HPX,PKM,PGLS,ALAD,PRDX5,ALDOA,VCP,FOLH1,IDH1,AKR7A2,GAPDH,SPR,GGH,BLVRB,BTD,PNP,GPI,LDHA,LDHB,CBR1,NAMPT,ENO1,TPI1
GO: Biological Process	GO:0019731	antibacterial humoral response		2.387e-07	1.014e-05	11	56	PGC,SPON2,SEMG1,SEMG2,ANG,APP,KLK3,SLPI,B2M,CAMP,LTF
GO: Biological Process	GO:0001738	morphogenesis of a polarized epithelium		2.531e-07	1.068e-05	17	141	PFN1,UBA52,EZR,PSMA2,PSMA4,PSMA5,PSMA6,PSMB1,PSMB2,PSMB3,PSMC3,PSMC4,PSMD5,PSME1,RAB10,LAMA5,CDC42
GO: Biological Process	GO:0032101	regulation of response to external stimulus		2.564e-07	1.074e-05	56	1014	A2M,PARK7,SERPINF1,CD109,MDH1,ADAM10,PGC,UBA52,AGT,PLA2G2A,SERPINF2,HSPB1,SEMA3C,VTN,FN1,ANXA1,ANXA2,ANXA5,APCS,APOA1,ST6GAL1,APOD,APOH,CFI,CARTPT,RUVBL1,CHID1,IL6ST,ATP6V1A,GAPDH,PSMA6,B2M,ACE,CFB,GGT1,QSOX1,PTPRF,SERPING1,RAB7A,C3,C4A,NOV,ITCH,CALM1,CALR,CORO1B,PRDX2,GSTP1,THBS1,LPL,TSPAN8,TSPAN6,CD59,IL1RL1,LTF,AGRN
GO: Biological Process	GO:0051270	regulation of cellular component movement		2.592e-07	1.077e-05	50	860	SERPINF1,ACTN1,PFN1,ADAM10,EFEMP1,AGT,MMP2,HSPA5,SDCBP,HSPB1,VCL,ALOX15B,SEMG1,SEMG2,SEMA3C,VTN,FN1,ANXA1,ANXA3,WNT7A,ANXA5,OLFM4,APOD,APOH,IGFBP5,PRCP,CTSH,IL6ST,RAB11A,ACE,IQGAP1,B4GALT1,PTN,NOV,DSC2,PDCD6,CALR,LAMA5,LAMP1,CORO1B,ECM1,TF,GSN,TGFBR3,COL18A1,THBS1,TIMP1,CD81,CDH1,AGRN
GO: Biological Process	GO:0061621	canonical glycolysis		2.645e-07	1.077e-05	8	26	PGAM1,PGK1,PKM,ALDOA,GAPDH,GPI,ENO1,TPI1
GO: Biological Process	GO:0006735	NADH regeneration		2.645e-07	1.077e-05	8	26	PGAM1,PGK1,PKM,ALDOA,GAPDH,GPI,ENO1,TPI1
GO: Biological Process	GO:0061718	glucose catabolic process to pyruvate		2.645e-07	1.077e-05	8	26	PGAM1,PGK1,PKM,ALDOA,GAPDH,GPI,ENO1,TPI1
GO: Biological Process	GO:0006006	glucose metabolic process		2.689e-07	1.087e-05	22	229	AKR1A1,MDH1,PGAM1,PGK1,PGM1,FBP1,PKM,ALDOA,APOD,PPP1CB,IGFBP4,IGFBP5,GAA,SORD,GALM,GAPDH,FBP2,GOT1,GPI,LDHA,ENO1,TPI1
GO: Biological Process	GO:0042340	keratan sulfate catabolic process		2.963e-07	1.181e-05	6	12	HEXA,HEXB,FMOD,GALNS,GLB1,GNS
GO: Biological Process	GO:0009313	oligosaccharide catabolic process		2.963e-07	1.181e-05	6	12	HEXB,MAN2B1,MANBA,CTBS,NEU1,GM2A
GO: Biological Process	GO:0051352	negative regulation of ligase activity		3.142e-07	1.244e-05	13	83	PARK7,UBA52,PSMA2,PSMA4,PSMA5,PSMA6,PSMB1,PSMB2,PSMB3,PSMC3,PSMC4,PSMD5,PSME1
GO: Biological Process	GO:0043069	negative regulation of programmed cell death		3.403e-07	1.339e-05	52	919	AARS,HSP90B1,CFL1,PARK7,UBA52,CLU,UBE2V2,AGT,PIP,ALB,PRDX5,HSPA1A,HSPA5,HSPA8,HSPB1,HSP90AB1,HYOU1,FN1,ANXA1,ANXA4,WNT7A,ANXA5,ST6GAL1,APOH,YWHAE,YWHAH,YWHAZ,ARF4,DNAJC5,CTSH,DNAJC3,IL6ST,SOD1,LGMN,TMBIM1,GLO1,NME2,SFN,PNP,GPI,ITCH,PRDX2,TMBIM6,GSTP1,TGFBR3,LIFR,THBS1,TIMP1,CD38,EIF5A,CD59,LTF
GO: Biological Process	GO:0051049	regulation of transport		3.573e-07	1.396e-05	90	1975	ACAT2,PARK7,TSG101,FAM3D,TXN,MVB12A,CRISP1,CLIC1,LIPG,AGT,HSPA1A,HSPA2,HSPA8,SDCBP,ALOX15B,HSP90AA1,HSP90AB1,EZR,SEMG1,VTN,ANG,FN1,ANPEP,ANXA1,ANXA2,ANXA4,ANXA5,OLFM4,RAB3D,APOA1,APOD,PPIA,YWHAB,YWHAE,YWHAG,YWHAH,YWHAZ,CARTPT,RUVBL1,RAB21,PRSS8,SPINK2,MYO6,B2M,RAB11A,DBI,ACE,B4GALT1,REEP6,TEX101,RAB7A,OS9,C3,C4A,KIF5B,YWHAQ,RAB3A,RAB3B,RAB27A,RAB27B,CA2,NOV,SFN,CACNA2D1,RAP1B,PDCD6IP,CALM1,CALR,C…
GO: Biological Process	GO:0006979	response to oxidative stress		3.654e-07	1.418e-05	32	439	HEBP2,PARK7,TXN,ALAD,ALDH1A1,MMP2,PRDX5,HSPA1A,HSPB1,ATRN,SELENOP,FN1,ANXA1,IDH1,APOD,APP,PRDX6,CST3,SOD1,SOD3,PSAP,GPX3,PRDX2,LCN2,LDHA,GSS,GSTP1,THBS1,EEF2,P4HB,CD38,PRDX1
GO: Biological Process	GO:0021762	substantia nigra development		3.846e-07	1.482e-05	10	47	ACTB,CKB,BASP1,HSPA5,YWHAE,YWHAH,YWHAQ,CALM1,LDHA,CDC42
GO: Biological Process	GO:0045088	regulation of innate immune response		3.87e-07	1.482e-05	29	375	A2M,HSP90B1,REG3G,UBA52,HPX,MMP2,HSPA1A,HSP90AB1,CTSB,CTSL,LGMN,ERAP1,PSMA2,PSMA4,PSMA5,PSMA6,PSMB1,PSMB2,PSMB3,PSMC3,PSMC4,PSMD5,PSME1,SERPING1,ITCH,LAMP1,CD14,TSPAN6,LTF
GO: Biological Process	GO:0007033	vacuole organization		4.119e-07	1.567e-05	21	216	HEXA,HEXB,MAN2A1,TSG101,MVB12A,TPP1,CLN5,HSPA8,VPS25,CTSD,GAA,NAGLU,RAB11A,RAB7A,RAB1A,RAB27A,VPS37C,PDCD6IP,VPS37B,SYT7,VPS28
GO: Biological Process	GO:0044265	cellular macromolecule catabolic process		4.168e-07	1.576e-05	54	977	HSP90B1,MANBA,RPLP1,ACR,PARK7,TSG101,DNAJB9,UBA52,UBA1,MVB12A,CLU,UBE2V2,UCHL3,CPVL,HSPA5,SDCBP,VCP,HSP90AB1,EZR,ANXA2,VPS25,DIS3,PPP2R1A,RNASET2,CST3,CTSB,CTSH,CTSL,DNAJC3,CTSZ,LGMN,CTSF,PSMA2,PSMA4,PSMA5,PSMA6,PSMB1,PSMB2,PSMB3,PSMC3,PSMC4,PSMD5,PSME1,RAB7A,OS9,DNASE2,GPC1,ITCH,PDCD6IP,USP5,RNH1,SCPEP1,CD81,VPS28
GO: Biological Process	GO:0048771	tissue remodeling		4.522e-07	1.699e-05	19	181	TPP1,AGT,MMP2,SEMA3C,ANXA1,RAB3D,CARTPT,IGFBP5,CST3,ACE,TMBIM1,B4GALT1,RAB7A,CA2,SYT7,TF,TGFBR3,LIPA,CD38
GO: Biological Process	GO:0051247	positive regulation of protein metabolic process		4.734e-07	1.767e-05	77	1611	RPLP1,PARK7,TXN,UBA52,CLU,UBE2V2,AGT,HPX,PLA2G2A,SERPINF2,HSPA2,HSPA5,HSPA8,SDCBP,HSPB1,VCP,HSP90AB1,EZR,SEMG1,SEMG2,VTN,ANG,FN1,GDF15,ANXA2,WNT7A,APP,PPP1R7,CARTPT,IGFBP4,RUVBL1,PRKAR2A,SMPD1,CTSH,DNAJC3,IL6ST,SOD1,PSAP,PSMA2,PSMA4,PSMA5,PSMA6,PSMB1,PSMB2,PSMB3,PSMC3,PSMC4,PSMD5,PSME1,ACE,IQGAP1,TEX101,RAB7A,C3,RAB1A,FAM129A,RAP1B,ITCH,PDCD6,CALM1,CAMP,PRDX2,TF,PDIA3,GSN,LEFTY2,USP5,THBS1,EEF2,T…
GO: Biological Process	GO:0031647	regulation of protein stability		4.864e-07	1.804e-05	22	237	PARK7,PFN1,CLU,HSPA1A,HSPA8,HSP90AA1,HSP90AB1,APOA1,CCT2,PPIB,CCT5,CTSH,GAPDH,CALR,LAMP1,LAMP2,TF,GSN,TSPAN1,CCT6A,CD81,CDC42
GO: Biological Process	GO:0060341	regulation of cellular localization		5.019e-07	1.85e-05	70	1416	PARK7,TSG101,FAM3D,TXN,CRISP1,AGT,HSPA1A,SDCBP,ALOX15B,HSP90AA1,HSP90AB1,EZR,ANG,FN1,ANXA1,ANXA4,ANXA5,AGR2,RAB3D,APOA1,CCT2,APOD,PPIA,YWHAB,YWHAE,YWHAG,YWHAH,YWHAZ,CARTPT,RUVBL1,CCT5,RAB21,SPINK2,DBI,TMBIM1,IQGAP1,B4GALT1,PTN,REEP6,TEX101,RAB7A,OS9,KIF5B,YWHAQ,RAB3A,RAB3B,RAB27A,RAB27B,NOV,SFN,RAP1B,PDCD6IP,CALM1,CAMP,NUCB1,LAMP1,LCP1,TMBIM6,SYT7,GSN,CCT6A,CD14,PAEP,LPL,CD38,PRDX1,IL1RL1,SYTL1,C…
GO: Biological Process	GO:1904667	negative regulation of ubiquitin protein ligase activity		5.218e-07	1.911e-05	12	73	UBA52,PSMA2,PSMA4,PSMA5,PSMA6,PSMB1,PSMB2,PSMB3,PSMC3,PSMC4,PSMD5,PSME1
GO: Biological Process	GO:0019068	virion assembly		5.59e-07	2.028e-05	9	38	TSG101,UBA52,MVB12A,PPIA,RAB1A,VPS37C,PDCD6IP,VPS37B,VPS28
GO: Biological Process	GO:0002478	antigen processing and presentation of exogenous peptide antigen		5.609e-07	2.028e-05	18	166	CTSD,CTSL,LGMN,CTSF,PSMA2,PSMA4,PSMA5,PSMA6,B2M,PSMB1,PSMB2,PSMB3,PSMC3,PSMC4,PSMD5,PSME1,RAB7A,LNPEP
GO: Biological Process	GO:0006027	glycosaminoglycan catabolic process		5.936e-07	2.133e-05	11	61	HEXA,HEXB,FMOD,FUCA1,GALNS,NAGLU,GLB1,GNS,GPC1,AGRN,SPACA3
GO: Biological Process	GO:0030855	epithelial cell differentiation		6.656e-07	2.363e-05	41	662	CD109,REG3G,TSG101,PGK1,BASP1,TPP1,AGT,TAGLN2,MLPH,PLS3,ALOX15B,EZR,ANXA1,ANXA4,WNT7A,ANXA7,AGR2,CTSB,SOD1,PSAP,MYO6,IQGAP1,B4GALT1,PTN,RAB10,F11R,PTPRS,CAPN5,NME2,RAB1A,RAB27A,SFN,RAP1B,PLOD3,LAMA5,LAMB2,CBR1,GSTM3,COL18A1,CDC42,CDH1
GO: Biological Process	GO:0051603	proteolysis involved in cellular protein catabolic process		6.656e-07	2.363e-05	41	662	HSP90B1,ACR,PARK7,TSG101,DNAJB9,UBA52,UBA1,MVB12A,CLU,UBE2V2,UCHL3,CPVL,HSPA5,SDCBP,VCP,HSP90AB1,VPS25,CTSB,CTSH,CTSL,DNAJC3,CTSZ,LGMN,CTSF,PSMA2,PSMA4,PSMA5,PSMA6,PSMB1,PSMB2,PSMB3,PSMC3,PSMC4,PSMD5,PSME1,OS9,ITCH,PDCD6IP,USP5,SCPEP1,VPS28
GO: Biological Process	GO:0061620	glycolytic process through glucose-6-phosphate		6.769e-07	2.389e-05	8	29	PGAM1,PGK1,PKM,ALDOA,GAPDH,GPI,ENO1,TPI1
GO: Biological Process	GO:0010608	posttranscriptional regulation of gene expression		7.093e-07	2.488e-05	33	475	RIDA,AARS,ACO1,UBA52,HSPA1A,HSPA8,HSPB1,ANG,APP,YWHAB,DIS3,YWHAZ,IGFBP5,DNAJC3,GAPDH,PSMA2,PSMA4,PSMA5,PSMA6,PSMB1,PSMB2,PSMB3,PSMC3,PSMC4,PSMD5,PSME1,ACE,PTCD3,FAM129A,CALR,THBS1,EEF2,EIF5A
GO: Biological Process	GO:0032787	monocarboxylic acid metabolic process		7.607e-07	2.652e-05	39	617	EPHX2,ACLY,PARK7,AKR1A1,PGAM1,PGD,PGK1,PGM1,FASN,FBP1,AGT,PKM,ALDH1A1,ALDOA,ALOX15B,ANXA1,APOA1,IDH1,PTGES3,SORD,GAPDH,DBI,PTGDS,PHGDH,GGT1,BTD,GLO1,C3,GPI,LDHA,LDHB,CBR1,LDHC,LIPA,P4HB,LPL,SCPEP1,ENO1,TPI1
GO: Biological Process	GO:0070201	regulation of establishment of protein localization		7.922e-07	2.745e-05	50	893	PARK7,TSG101,FAM3D,TXN,AGT,HSPA8,ALOX15B,HSP90AA1,HSP90AB1,EZR,ANG,FN1,ANXA1,ANXA4,ANXA5,AGR2,APOA1,CCT2,APOD,PPIA,YWHAB,YWHAE,YWHAG,YWHAH,YWHAZ,CARTPT,RUVBL1,CCT5,RAB11A,TMBIM1,OS9,KIF5B,YWHAQ,NOV,SFN,CAMP,NUCB1,LCP1,TMBIM6,SYT7,CCT6A,CD14,PAEP,LPL,CD38,PRDX1,IL1RL1,VPS28,CDC42,CDH1
GO: Biological Process	GO:0019730	antimicrobial humoral response		8.329e-07	2.869e-05	11	63	PGC,SPON2,SEMG1,SEMG2,ANG,APP,KLK3,SLPI,B2M,CAMP,LTF
GO: Biological Process	GO:0045089	positive regulation of innate immune response		8.557e-07	2.93e-05	25	305	HSP90B1,REG3G,UBA52,HPX,MMP2,HSPA1A,CTSB,CTSL,LGMN,PSMA2,PSMA4,PSMA5,PSMA6,PSMB1,PSMB2,PSMB3,PSMC3,PSMC4,PSMD5,PSME1,ITCH,LAMP1,CD14,TSPAN6,LTF
GO: Biological Process	GO:0061615	glycolytic process through fructose-6-phosphate		9.015e-07	3.051e-05	8	30	PGAM1,PGK1,PKM,ALDOA,GAPDH,GPI,ENO1,TPI1
GO: Biological Process	GO:0036258	multivesicular body assembly		9.015e-07	3.051e-05	8	30	TSG101,MVB12A,VPS25,RAB11A,VPS37C,PDCD6IP,VPS37B,VPS28
GO: Biological Process	GO:0016477	cell migration		9.159e-07	3.082e-05	65	1300	HEXB,CFL1,MATN2,SERPINF1,PFN1,ADAM10,EFEMP1,AGT,MMP2,HSPA5,SDCBP,HSPB1,VCL,CAP1,ALOX15B,HSP90AA1,SEMA3C,VTN,ANG,FN1,ANXA1,ANXA3,WNT7A,OLFM4,APOA1,PODXL2,APOD,APOH,PPIA,YWHAE,ARF4,RHOC,IGFBP5,PLPP1,PRCP,CTSH,IL6ST,SPOCK1,RAB11A,ACE,IQGAP1,B4GALT1,PTN,PTPRF,F11R,GLG1,RAB1A,NOV,DPP4,PDCD6,CD177,CALR,LAMA5,LAMC1,CORO1B,LCP1,ECM1,GSN,TSPAN1,TGFBR3,COL18A1,THBS1,TIMP1,CDC42,CDH1
GO: Biological Process	GO:0019637	organophosphate metabolic process		9.427e-07	3.129e-05	60	1164	HEXB,ACR,PARK7,ACPP,AKR1A1,MDH1,PGAM1,PGD,PGK1,PGM1,FBP1,PLAA,PLA1A,LIPG,HPRT1,UGP2,PKM,PGLS,PLA2G2A,ALDH1A1,PRDX5,ALDOA,HSPA1A,HSPA8,CAP1,VCP,APOA1,IDH1,MINPP1,APRT,KLK3,ARF3,PLPP1,NT5C2,SMPD1,SORD,ATP6V1A,CMPK1,IMPA1,GAPDH,GARS,DBI,CANT1,SMPDL3A,NME2,PNP,GPI,CALM1,SLC44A4,LDHA,LDHB,LDHC,THBS1,NAMPT,TIMP2,LPL,CD81,CDC42,ENO1,TPI1
GO: Biological Process	GO:0031145	anaphase-promoting complex-dependent catabolic process		9.461e-07	3.129e-05	12	77	UBA52,PSMA2,PSMA4,PSMA5,PSMA6,PSMB1,PSMB2,PSMB3,PSMC3,PSMC4,PSMD5,PSME1
GO: Biological Process	GO:0044282	small molecule catabolic process		9.478e-07	3.129e-05	28	370	HGD,DDAH1,ESD,PARK7,AKR1A1,PGAM1,PGK1,PGM1,ADH5,FAH,PKM,ALDH1A1,ALDOA,CRYM,SMPD1,FUT5,SORD,IMPA1,GAPDH,DBI,GLB1,SMPDL3A,GLO1,GOT1,GPI,LDHA,ENO1,TPI1
GO: Biological Process	GO:0048514	blood vessel morphogenesis		9.513e-07	3.129e-05	36	551	DDAH1,SERPINF1,LRG1,AGT,MMP2,SERPINF2,HSPB1,ANG,WARS,FN1,ANPEP,ADAMTS1,ANXA2,ANXA3,WNT7A,APOD,APOH,KLK3,PRCP,CTSH,ERAP1,ACE,B4GALT1,PTN,C3,NOV,GPI,PDCD6,CAMP,LAMA5,ECM1,TGFBR3,COL18A1,THBS1,RNH1,CDC42
GO: Biological Process	GO:0042176	regulation of protein catabolic process		9.623e-07	3.147e-05	30	414	PARK7,UBA52,CLU,UBE2V2,SDCBP,VCP,HSP90AB1,EZR,ANXA2,CST3,PSMA2,PSMA4,PSMA5,PSMA6,PSMB1,PSMB2,PSMB3,PSMC3,PSMC4,PSMD5,PSME1,RAB7A,OS9,ITCH,USP5,TIMP1,TIMP2,CD81,VPS28,CDC42
GO: Biological Process	GO:0019884	antigen processing and presentation of exogenous antigen		1.032e-06	3.358e-05	18	173	CTSD,CTSL,LGMN,CTSF,PSMA2,PSMA4,PSMA5,PSMA6,B2M,PSMB1,PSMB2,PSMB3,PSMC3,PSMC4,PSMD5,PSME1,RAB7A,LNPEP
GO: Biological Process	GO:0002758	innate immune response-activating signal transduction		1.051e-06	3.399e-05	22	248	HSP90B1,REG3G,UBA52,HSPA1A,CTSB,CTSL,LGMN,PSMA2,PSMA4,PSMA5,PSMA6,PSMB1,PSMB2,PSMB3,PSMC3,PSMC4,PSMD5,PSME1,ITCH,CD14,TSPAN6,LTF
GO: Biological Process	GO:2000060	positive regulation of ubiquitin-dependent protein catabolic process		1.064e-06	3.422e-05	13	92	UBA52,CLU,PSMA2,PSMA4,PSMA5,PSMA6,PSMB1,PSMB2,PSMB3,PSMC3,PSMC4,PSMD5,PSME1
GO: Biological Process	GO:0097435	supramolecular fiber organization		1.175e-06	3.757e-05	7	22	PARK7,MFAP4,HSPA8,HSP90AB1,APP,CST3,GSN
GO: Biological Process	GO:0061024	membrane organization		1.188e-06	3.779e-05	57	1091	RPLP1,HEBP2,TSG101,IGLL5,UBA52,SERPINA1,MVB12A,PIGR,CLU,CRISP1,BAIAP2,HSPA1A,HSPA8,SDCBP,HSP90AA1,EZR,ANXA1,ANXA2,ANXA7,AGR2,CPE,PPIA,YWHAB,YWHAE,YWHAG,YWHAH,YWHAZ,PPP2R1A,CTSZ,SOD1,RAB11A,TMBIM1,PTN,RAB10,F11R,RAB7A,KIF5B,YWHAQ,RAB1A,RAB3A,SFN,VPS37C,PDCD6IP,LAMA5,VPS37B,SYT7,GSN,MPP5,THBS1,CD9,LNPEP,CD59,VPS28,SYTL1,CDH1,AGRN,SERPINA5
GO: Biological Process	GO:0032270	positive regulation of cellular protein metabolic process		1.355e-06	4.272e-05	72	1512	RPLP1,PARK7,TXN,UBA52,CLU,UBE2V2,AGT,HPX,PLA2G2A,SERPINF2,HSPA2,HSPA5,HSPA8,SDCBP,VCP,HSP90AB1,EZR,SEMG1,SEMG2,VTN,ANG,FN1,GDF15,ANXA2,WNT7A,APP,PPP1R7,CARTPT,IGFBP4,RUVBL1,PRKAR2A,SMPD1,CTSH,DNAJC3,IL6ST,SOD1,PSAP,PSMA2,PSMA4,PSMA5,PSMA6,PSMB1,PSMB2,PSMB3,PSMC3,PSMC4,PSMD5,PSME1,ACE,IQGAP1,TEX101,C3,FAM129A,RAP1B,PDCD6,CALM1,CAMP,PRDX2,TF,PDIA3,GSN,LEFTY2,USP5,THBS1,EEF2,TIMP2,EIF5A,CD81,CLEC3B,…
GO: Biological Process	GO:0015031	protein transport		1.358e-06	4.272e-05	87	1948	HSP90B1,RPLP1,CFL1,PARK7,TSG101,FAM3D,TXN,UBA52,MVB12A,CLU,AGT,MLPH,HSPA8,SDCBP,VCP,ALOX15B,HSP90AA1,HSP90AB1,EZR,ANG,FN1,ANXA1,ANXA2,ANXA4,ANXA5,RAB3D,APOA1,VPS25,APOD,PPIA,RAB6B,YWHAB,YWHAE,YWHAG,YWHAH,YWHAZ,ARF3,ARF4,CARTPT,RUVBL1,RAB21,ATP6V1A,MYO6,AZGP1,RAB11A,GNPTG,GDI2,RAB10,RAB7A,OS9,KIF5B,YWHAQ,RAB1A,RAB2A,RAB3A,RAB3B,RAB27A,NOV,SFN,DOPEY2,PNP,VPS37C,PDCD6IP,PDCD6,CALR,CAMP,NUCB1,LAMP2,F…
GO: Biological Process	GO:0035567	non-canonical Wnt signaling pathway		1.406e-06	4.402e-05	17	159	PFN1,UBA52,WNT7A,PSMA2,PSMA4,PSMA5,PSMA6,PSMB1,PSMB2,PSMB3,PSMC3,PSMC4,PSMD5,PSME1,GNB1,CALM1,CDC42
GO: Biological Process	GO:0050821	protein stabilization		1.426e-06	4.439e-05	16	142	PARK7,PFN1,CLU,HSPA1A,HSP90AA1,HSP90AB1,APOA1,CCT2,PPIB,CCT5,GAPDH,CALR,LAMP1,LAMP2,TSPAN1,CCT6A
GO: Biological Process	GO:0046185	aldehyde catabolic process		1.498e-06	4.639e-05	6	15	ESD,PARK7,AKR1A1,ADH5,GLO1,GPI
GO: Biological Process	GO:0006165	nucleoside diphosphate phosphorylation		1.545e-06	4.76e-05	13	95	PGAM1,PGK1,PGM1,FBP1,PKM,ALDOA,CMPK1,GAPDH,NME2,GPI,LDHA,ENO1,TPI1
GO: Biological Process	GO:0042026	protein refolding		1.649e-06	5.009e-05	7	23	HSPA1A,HSPA2,HSPA6,HSPA8,HSP90AA1,PTGES3,B2M
GO: Biological Process	GO:0097066	response to thyroid hormone		1.649e-06	5.009e-05	7	23	ANXA2,ANXA5,CTSB,CTSH,CTSL,CFB,LMO2
GO: Biological Process	GO:1904668	positive regulation of ubiquitin protein ligase activity		1.652e-06	5.009e-05	12	81	UBA52,PSMA2,PSMA4,PSMA5,PSMA6,PSMB1,PSMB2,PSMB3,PSMC3,PSMC4,PSMD5,PSME1
GO: Biological Process	GO:0006909	phagocytosis		1.674e-06	5.049e-05	22	255	ACTB,IGLL5,SPON2,BAIAP2,HSPA8,HSP90AA1,HSP90AB1,ANXA1,ANXA3,ANXA11,OLFM4,RAB7A,C3,C4A,RAB27A,CALR,SYT7,GSN,THBS1,CD14,CDC42,SPACA3
GO: Biological Process	GO:0048729	tissue morphogenesis		1.692e-06	5.076e-05	44	762	MAN2A1,CFL1,ACTG2,PFN1,UBA52,AGT,ALDH1A1,MMP2,VCL,EZR,SEMA3C,WNT7A,KLK3,RHOC,IGFBP5,CTSD,CTSH,CTSZ,SPINT1,PSMA2,PSMA4,PSMA5,PSMA6,PSMB1,PSMB2,PSMB3,PSMC3,PSMC4,PSMD5,PSME1,B4GALT1,PTN,RAB10,TWSG1,CA2,GPI,PLOD3,LAMA5,LCP1,GSN,TGFBR3,MPP5,CDC42,CDH1
GO: Biological Process	GO:0032102	negative regulation of response to external stimulus		1.732e-06	5.17e-05	25	317	SERPINF1,CD109,SERPINF2,SEMA3C,VTN,ANXA2,ANXA5,APCS,APOA1,ST6GAL1,APOD,APOH,CARTPT,CHID1,QSOX1,SERPING1,NOV,ITCH,CORO1B,PRDX2,GSTP1,THBS1,TSPAN8,TSPAN6,LTF
GO: Biological Process	GO:0002218	activation of innate immune response		1.786e-06	5.306e-05	22	256	HSP90B1,REG3G,UBA52,HSPA1A,CTSB,CTSL,LGMN,PSMA2,PSMA4,PSMA5,PSMA6,PSMB1,PSMB2,PSMB3,PSMC3,PSMC4,PSMD5,PSME1,ITCH,CD14,TSPAN6,LTF
GO: Biological Process	GO:0042339	keratan sulfate metabolic process		1.992e-06	5.887e-05	8	33	HEXA,HEXB,B4GALT5,FMOD,GALNS,B4GALT1,GLB1,GNS
GO: Biological Process	GO:2000145	regulation of cell motility		2.041e-06	6.002e-05	45	793	SERPINF1,PFN1,ADAM10,EFEMP1,AGT,MMP2,HSPA5,SDCBP,HSPB1,VCL,ALOX15B,SEMG1,SEMG2,SEMA3C,VTN,FN1,ANXA1,ANXA3,WNT7A,ANXA5,OLFM4,APOD,APOH,IGFBP5,PRCP,CTSH,IL6ST,RAB11A,ACE,IQGAP1,PTN,NOV,PDCD6,CALR,LAMA5,CORO1B,ECM1,TF,GSN,TGFBR3,COL18A1,THBS1,TIMP1,CD81,CDH1
GO: Biological Process	GO:0006090	pyruvate metabolic process		2.081e-06	6.059e-05	14	113	PGAM1,PGK1,PGM1,FBP1,PKM,ALDOA,GAPDH,GLO1,GPI,LDHA,LDHB,LDHC,ENO1,TPI1
GO: Biological Process	GO:0060071	Wnt signaling pathway, planar cell polarity pathway		2.081e-06	6.059e-05	14	113	PFN1,UBA52,PSMA2,PSMA4,PSMA5,PSMA6,PSMB1,PSMB2,PSMB3,PSMC3,PSMC4,PSMD5,PSME1,CDC42
GO: Biological Process	GO:0030149	sphingolipid catabolic process		2.275e-06	6.589e-05	7	24	HEXA,HEXB,SMPD1,NEU1,GLA,SMPDL3A,GM2A
GO: Biological Process	GO:0090175	regulation of establishment of planar polarity		2.315e-06	6.673e-05	14	114	PFN1,UBA52,PSMA2,PSMA4,PSMA5,PSMA6,PSMB1,PSMB2,PSMB3,PSMC3,PSMC4,PSMD5,PSME1,CDC42
GO: Biological Process	GO:0030324	lung development		2.384e-06	6.808e-05	20	221	RIDA,MAN2A1,AGR2,CP,IGFBP5,ASAH1,CTSD,CTSH,PTGES3,CTSZ,ACE,GGT1,PTN,RAB3A,CRISPLD2,PLOD3,LAMA5,TMBIM6,LIPA,CDC42
GO: Biological Process	GO:0002764	immune response-regulating signaling pathway		2.386e-06	6.808e-05	33	502	HSP90B1,ACTB,REG3G,IGLL5,UBA52,PIGR,BAIAP2,HSPA1A,HSP90AA1,HSP90AB1,EZR,CTSB,CTSH,CTSL,LGMN,PSMA2,PSMA4,PSMA5,PSMA6,PSMB1,PSMB2,PSMB3,PSMC3,PSMC4,PSMD5,PSME1,ITCH,CALM1,CD14,CD38,TSPAN6,LTF,CDC42
GO: Biological Process	GO:0019319	hexose biosynthetic process		2.484e-06	7.055e-05	13	99	MDH1,PGAM1,PGK1,PGM1,FBP1,ALDOA,SORD,GAPDH,FBP2,GOT1,GPI,ENO1,TPI1
GO: Biological Process	GO:0030449	regulation of complement activation		2.544e-06	7.189e-05	8	34	A2M,VTN,CFI,CFB,SERPING1,C3,C4A,CD59
GO: Biological Process	GO:0072593	reactive oxygen species metabolic process		2.618e-06	7.363e-05	22	262	EPHX2,DDAH1,PARK7,CLU,AGT,PRDX5,HSP90AA1,HSP90AB1,PRDX6,ARF4,PRCP,SOD1,SOD3,SPR,GLA,RAB27A,GPX3,PRDX2,GSTP1,THBS1,PRDX1,EIF5A
GO: Biological Process	GO:0022610	biological adhesion		2.752e-06	7.702e-05	72	1542	ACTB,ACTN1,ADAM10,MFAP4,FBLN2,CLIC1,SPON2,AGT,MMP2,SERPINF2,HSPB1,VCL,HSP90AA1,HSP90AB1,EZR,COL6A2,COL12A1,VTN,FN1,ANXA1,AGR2,OLFM4,APOA1,ST6GAL1,PODXL2,APOD,APP,CLSTN1,PPP1CB,PPP2R1A,LYPD3,EPDR1,IL6ST,SOD1,SPOCK1,AZGP1,B2M,SMOC2,IQGAP1,B4GALT1,PTN,PTPRF,F11R,PTPRS,NME2,RAB1A,RAB27A,NOV,PNP,DPP4,ITCH,DSC2,CALR,LAMA5,LAMB2,LAMC1,NCSTN,PRDX2,LCP1,GSN,LGALS3BP,GSTP1,COL18A1,THBS1,CD9,CD59,LSAMP,CD81…
GO: Biological Process	GO:1904666	regulation of ubiquitin protein ligase activity		2.788e-06	7.765e-05	12	85	UBA52,PSMA2,PSMA4,PSMA5,PSMA6,PSMB1,PSMB2,PSMB3,PSMC3,PSMC4,PSMD5,PSME1
GO: Biological Process	GO:0002920	regulation of humoral immune response		2.973e-06	8.242e-05	10	58	A2M,PGC,HPX,VTN,CFI,CFB,SERPING1,C3,C4A,CD59
GO: Biological Process	GO:0031397	negative regulation of protein ubiquitination		2.997e-06	8.269e-05	15	133	PARK7,UBA52,HSPA1A,PSMA2,PSMA4,PSMA5,PSMA6,PSMB1,PSMB2,PSMB3,PSMC3,PSMC4,PSMD5,PSME1,VPS28
GO: Biological Process	GO:0023056	positive regulation of signaling		3.029e-06	8.318e-05	76	1662	PARK7,ACPP,LRG1,TXN,UBA52,CLU,AGT,HPX,PLA2G2A,SERPINF2,HSPA1A,SDCBP,ALOX15B,VTN,GDF15,WNT7A,AGR2,APOA1,CLSTN1,YWHAB,YWHAE,YWHAG,YWHAH,YWHAZ,RHOC,CARTPT,PPP2R1A,IGFBP4,IGFBP5,CTSH,IL6ST,SOD1,PSAP,PSMA2,PSMA4,PSMA5,PSMA6,PSMB1,STARD10,PSMB2,PSMB3,PSMC3,PSMC4,PSMD5,DBI,PSME1,IQGAP1,PTN,CANT1,C3,TWSG1,KIF5B,YWHAQ,RAB3A,RAB3B,CA2,NOV,SFN,RAP1B,CALM1,CALR,PRDX2,ECM1,TF,PDIA3,GSN,LEFTY2,TGFBR3,THBS1,TIM…
GO: Biological Process	GO:0030323	respiratory tube development		3.141e-06	8.585e-05	20	225	RIDA,MAN2A1,AGR2,CP,IGFBP5,ASAH1,CTSD,CTSH,PTGES3,CTSZ,ACE,GGT1,PTN,RAB3A,CRISPLD2,PLOD3,LAMA5,TMBIM6,LIPA,CDC42
GO: Biological Process	GO:0038093	Fc receptor signaling pathway		3.213e-06	8.727e-05	19	206	ACTB,UBA52,PIGR,BAIAP2,HSP90AA1,HSP90AB1,PSMA2,PSMA4,PSMA5,PSMA6,PSMB1,PSMB2,PSMB3,PSMC3,PSMC4,PSMD5,PSME1,CALM1,CDC42
GO: Biological Process	GO:0038127	ERBB signaling pathway		3.223e-06	8.727e-05	16	151	UBA52,EFEMP1,MVB12A,PIGR,AGT,HSP90AA1,AGR2,APLP2,APP,ARF4,ZFYVE28,LGMN,IQGAP1,PTPRF,RAB7A,CDC42
GO: Biological Process	GO:0051240	positive regulation of multicellular organismal process		3.472e-06	9.321e-05	74	1610	EPHX2,DDAH1,MAN2A1,ACAT2,PARK7,SERPINF1,PFN1,LRG1,CLU,UBE2V2,CLIC1,BASP1,LIPG,SPON2,AGT,ALB,BAIAP2,PRDX5,SERPINF2,HSPA1A,HSPA5,SDCBP,HSPB1,ALOX15B,HSP90AA1,EZR,FN1,ADAMTS1,ANXA1,ANXA3,WNT7A,APOH,CLSTN1,PPIB,CARTPT,RAB21,CTSH,IL6ST,SOD1,SPINT1,ERAP1,B2M,RAB11A,ACE,TMBIM1,IQGAP1,B4GALT1,PTN,NEU1,PTPRF,C3,NME2,CA2,SFN,PNP,GPC1,ITCH,PDCD6,CAMP,PRDX2,ECM1,TF,THBS1,CD14,TIMP2,PAEP,LPL,CD38,TSPAN6,SCPEP…
GO: Biological Process	GO:0006081	cellular aldehyde metabolic process		3.49e-06	9.321e-05	13	102	ESD,PARK7,AKR1A1,PGAM1,PGD,ADH5,PGLS,ALDH1A1,IDH1,AKR7A2,GLO1,GPI,TPI1
GO: Biological Process	GO:0046939	nucleotide phosphorylation		3.49e-06	9.321e-05	13	102	PGAM1,PGK1,PGM1,FBP1,PKM,ALDOA,CMPK1,GAPDH,NME2,GPI,LDHA,ENO1,TPI1
GO: Biological Process	GO:0002009	morphogenesis of an epithelium		3.7e-06	9.837e-05	37	609	CFL1,PFN1,UBA52,AGT,ALDH1A1,MMP2,VCL,EZR,SEMA3C,WNT7A,RHOC,IGFBP5,CTSD,CTSH,CTSZ,SPINT1,PSMA2,PSMA4,PSMA5,PSMA6,PSMB1,PSMB2,PSMB3,PSMC3,PSMC4,PSMD5,PSME1,B4GALT1,RAB10,CA2,PLOD3,LAMA5,LCP1,GSN,MPP5,CDC42,CDH1
GO: Biological Process	GO:0010648	negative regulation of cell communication		3.826e-06	0.0001012	64	1328	PARK7,CD109,FAM3D,UBA52,FBP1,CLU,AGT,HSPA1A,HSPA5,HSPB1,EZR,HYOU1,ANXA5,OLFM4,APOA1,APOD,YWHAB,ZFYVE28,CARTPT,PPP2R1A,IGFBP4,IGFBP5,SMPD1,IL6ST,LGMN,PSMA2,PSMA4,PSMA5,PSMA6,PSMB1,PSMB2,PSMB3,PSMC3,PSMC4,PSMD5,PSME1,TMBIM1,QSOX1,PTPRF,GLG1,RAB7A,TWSG1,NOV,GPC1,RAP1B,ITCH,PDCD6,CALM1,CALR,PRDX2,TMBIM6,ECM1,GSTP1,TGFBR3,THBS1,CD14,TIMP2,PEBP1,CD38,TSPAN6,IL1RL1,LTF,CDC42,CDH1
GO: Biological Process	GO:2000058	regulation of ubiquitin-dependent protein catabolic process		3.898e-06	0.0001027	13	103	UBA52,CLU,PSMA2,PSMA4,PSMA5,PSMA6,PSMB1,PSMB2,PSMB3,PSMC3,PSMC4,PSMD5,PSME1
GO: Biological Process	GO:0010243	response to organonitrogen compound		4.025e-06	0.0001055	47	866	AARS,HSP90B1,AOC1,CFL1,SERPINA1,UCHL3,HPRT1,AGT,PKM,ALAD,MMP2,BAIAP2,EZR,ANXA1,ANXA5,APP,APRT,YWHAG,IGFBP5,PRKAR2A,SMPD1,CTSB,SOD1,ATP6V1A,PSMB2,PTN,GGH,RAB10,PTPRF,GLRA2,GNB1,GNB2,GOT1,CA2,GPI,RAP1B,CALM1,TMBIM6,LDHA,GSN,GSS,GSTP1,EEF2,NAMPT,TIMP1,IL1RL1,CDH1
GO: Biological Process	GO:2000257	regulation of protein activation cascade		4.044e-06	0.0001056	8	36	A2M,VTN,CFI,CFB,SERPING1,C3,C4A,CD59
GO: Biological Process	GO:0006732	coenzyme metabolic process		4.176e-06	0.0001085	25	333	ACLY,MDH1,PGAM1,PGD,PGK1,PGM1,FASN,FBP1,PKM,PGLS,PRDX5,ALDOA,VCP,FOLH1,IDH1,GAPDH,SPR,GGH,PNP,GPI,LDHA,LDHB,NAMPT,ENO1,TPI1
GO: Biological Process	GO:0031329	regulation of cellular catabolic process		4.348e-06	0.0001125	39	663	PARK7,PGAM1,UBA52,FBP1,CLU,UBE2V2,SDCBP,HSPB1,VCP,HSP90AB1,EZR,ANXA2,APOA1,IDH1,APOH,PPP1CB,RUVBL1,CST3,ATP6V1A,PSAP,GAPDH,PSMA2,PSMA4,PSMA5,PSMA6,PSMB1,PSMB2,PSMB3,PSMC3,PSMC4,PSMD5,DBI,PSME1,QSOX1,RAB7A,USP5,TIMP1,TIMP2,CD81
GO: Biological Process	GO:0032880	regulation of protein localization		4.491e-06	0.0001157	54	1057	PARK7,TSG101,FAM3D,TXN,AGT,HSPA8,ALOX15B,HSP90AA1,HSP90AB1,EZR,ANG,FN1,ANXA1,ANXA4,WNT7A,ANXA5,AGR2,APOA1,CCT2,APOD,PPIA,YWHAB,YWHAE,YWHAG,YWHAH,YWHAZ,CARTPT,RUVBL1,CCT5,RAB11A,TMBIM1,IQGAP1,PTN,OS9,KIF5B,YWHAQ,NOV,SFN,CAMP,NUCB1,LCP1,TMBIM6,SYT7,GSN,CCT6A,CD14,PAEP,LPL,CD38,PRDX1,IL1RL1,VPS28,CDC42,CDH1
GO: Biological Process	GO:0033209	tumor necrosis factor-mediated signaling pathway		4.536e-06	0.0001163	16	155	UBA52,HSPA1A,APOA1,PSMA2,PSMA4,PSMA5,PSMA6,PSMB1,PSMB2,PSMB3,PSMC3,PSMC4,PSMD5,PSME1,TXNDC17,GSTP1
GO: Biological Process	GO:0019058	viral life cycle		4.572e-06	0.0001167	30	447	RPLP1,TSG101,PFN1,UBA52,MVB12A,HSPA1A,VCP,HSP90AB1,ANPEP,APCS,VPS25,PPIA,PPIB,SLPI,CTSB,F11R,RAB7A,RAB1A,VPS37C,DPP4,ITCH,PDCD6IP,LAMP1,VPS37B,GSN,P4HB,TMPRSS2,CD81,VPS28,LTF
GO: Biological Process	GO:0010647	positive regulation of cell communication		4.895e-06	0.0001244	76	1684	PARK7,ACPP,LRG1,TXN,UBA52,CLU,AGT,HPX,PLA2G2A,SERPINF2,HSPA1A,SDCBP,ALOX15B,VTN,GDF15,WNT7A,AGR2,APOA1,CLSTN1,YWHAB,YWHAE,YWHAG,YWHAH,YWHAZ,RHOC,CARTPT,PPP2R1A,IGFBP4,IGFBP5,CTSH,IL6ST,SOD1,PSAP,PSMA2,PSMA4,PSMA5,PSMA6,PSMB1,STARD10,PSMB2,PSMB3,PSMC3,PSMC4,PSMD5,DBI,PSME1,IQGAP1,PTN,CANT1,C3,TWSG1,KIF5B,YWHAQ,RAB3A,RAB3B,CA2,NOV,SFN,RAP1B,CALM1,CALR,PRDX2,ECM1,TF,PDIA3,GSN,LEFTY2,TGFBR3,THBS1,TIM…
GO: Biological Process	GO:0000302	response to reactive oxygen species		4.968e-06	0.0001258	21	252	HEBP2,PARK7,TXN,MMP2,PRDX5,FN1,ANXA1,APOD,PRDX6,SOD1,SOD3,PSAP,GPX3,PRDX2,LCN2,LDHA,GSTP1,THBS1,EEF2,P4HB,PRDX1
GO: Biological Process	GO:0023057	negative regulation of signaling		5.035e-06	0.0001262	63	1311	PARK7,CD109,FAM3D,UBA52,FBP1,CLU,AGT,HSPA1A,HSPA5,HSPB1,EZR,HYOU1,ANXA5,OLFM4,APOA1,APOD,YWHAB,ZFYVE28,CARTPT,PPP2R1A,IGFBP4,IGFBP5,SMPD1,IL6ST,LGMN,PSMA2,PSMA4,PSMA5,PSMA6,PSMB1,PSMB2,PSMB3,PSMC3,PSMC4,PSMD5,PSME1,TMBIM1,PTPRF,GLG1,RAB7A,TWSG1,NOV,GPC1,RAP1B,ITCH,PDCD6,CALM1,CALR,PRDX2,TMBIM6,ECM1,GSTP1,TGFBR3,THBS1,CD14,TIMP2,PEBP1,CD38,TSPAN6,IL1RL1,LTF,CDC42,CDH1
GO: Biological Process	GO:0016053	organic acid biosynthetic process		5.051e-06	0.0001262	24	315	ACLY,PARK7,AKR1A1,FASN,AGT,UGDH,UGP2,PKM,ALDH1A1,PLOD1,ALOX15B,FOLH1,ANXA1,APOA1,PTGES3,PTGDS,PHGDH,GGT1,GOT1,LDHA,LDHB,CBR1,LDHC,LPL
GO: Biological Process	GO:0046394	carboxylic acid biosynthetic process		5.051e-06	0.0001262	24	315	ACLY,PARK7,AKR1A1,FASN,AGT,UGDH,UGP2,PKM,ALDH1A1,PLOD1,ALOX15B,FOLH1,ANXA1,APOA1,PTGES3,PTGDS,PHGDH,GGT1,GOT1,LDHA,LDHB,CBR1,LDHC,LPL
GO: Biological Process	GO:0045862	positive regulation of proteolysis		5.098e-06	0.0001268	27	381	UBA52,CLU,UBE2V2,HSPA8,VCP,SEMG1,SEMG2,FN1,APP,RUVBL1,CTSH,PSMA2,PSMA4,PSMA5,PSMA6,PSMB1,PSMB2,PSMB3,PSMC3,PSMC4,PSMD5,PSME1,C3,PDCD6,GSN,USP5,CLEC3B
GO: Biological Process	GO:1990748	cellular detoxification		5.138e-06	0.0001273	12	90	PARK7,ALB,PRDX5,PRDX6,SOD1,SOD3,GPX3,TXNDC17,PRDX2,GSTM3,GSTT2,PRDX1
GO: Biological Process	GO:1901698	response to nitrogen compound		5.195e-06	0.0001282	51	981	AARS,HSP90B1,AOC1,CFL1,SERPINA1,UCHL3,HPRT1,AGT,PKM,ALAD,MMP2,BAIAP2,EZR,ANXA1,ANXA5,APP,APRT,YWHAG,IGFBP5,PRKAR2A,SMPD1,CTSB,SOD1,ATP6V1A,GAPDH,PSMB2,PTN,GGH,RAB10,PTPRF,GLRA2,GNB1,GNB2,GOT1,CA2,GPI,RAP1B,CALM1,TMBIM6,LDHA,GSN,GSS,GSTM3,GSTP1,THBS1,EEF2,NAMPT,TIMP1,IL1RL1,CDH1,AGRN
GO: Biological Process	GO:1903364	positive regulation of cellular protein catabolic process		5.347e-06	0.0001314	18	194	UBA52,CLU,UBE2V2,VCP,EZR,PSMA2,PSMA4,PSMA5,PSMA6,PSMB1,PSMB2,PSMB3,PSMC3,PSMC4,PSMD5,PSME1,USP5,CD81
GO: Biological Process	GO:0009185	ribonucleoside diphosphate metabolic process		5.386e-06	0.0001317	13	106	PGAM1,PGK1,PGM1,FBP1,PKM,ALDOA,CMPK1,GAPDH,CANT1,GPI,LDHA,ENO1,TPI1
GO: Biological Process	GO:0046466	membrane lipid catabolic process		5.442e-06	0.0001326	7	27	HEXA,HEXB,SMPD1,NEU1,GLA,SMPDL3A,GM2A
GO: Biological Process	GO:0060541	respiratory system development		5.62e-06	0.0001336	21	254	RIDA,MAN2A1,BASP1,AGR2,CP,IGFBP5,ASAH1,CTSD,CTSH,PTGES3,CTSZ,ACE,GGT1,PTN,RAB3A,CRISPLD2,PLOD3,LAMA5,TMBIM6,LIPA,CDC42
GO: Biological Process	GO:0006096	glycolytic process		5.654e-06	0.0001336	11	76	PGAM1,PGK1,PGM1,FBP1,PKM,ALDOA,GAPDH,GPI,LDHA,ENO1,TPI1
GO: Biological Process	GO:0090559	regulation of membrane permeability		5.654e-06	0.0001336	11	76	HEBP2,HSPA1A,HSPA8,YWHAB,YWHAE,YWHAG,YWHAH,YWHAZ,F11R,YWHAQ,SFN
GO: Biological Process	GO:0006022	aminoglycan metabolic process		5.677e-06	0.0001336	17	176	HEXA,HEXB,B4GALT5,UGDH,FMOD,CTBS,CHID1,FUCA1,GALNS,NAGLU,B4GALT1,GLB1,SPOCK3,GNS,GPC1,AGRN,SPACA3
GO: Biological Process	GO:0052126	movement in host environment		5.731e-06	0.0001336	14	123	HSPA1A,ANPEP,APCS,PPIA,FUCA2,CTSB,F11R,DPP4,ITCH,LAMP1,GSN,P4HB,TMPRSS2,CD81
GO: Biological Process	GO:0044409	entry into host		5.731e-06	0.0001336	14	123	HSPA1A,ANPEP,APCS,PPIA,FUCA2,CTSB,F11R,DPP4,ITCH,LAMP1,GSN,P4HB,TMPRSS2,CD81
GO: Biological Process	GO:0051806	entry into cell of other organism involved in symbiotic interaction		5.731e-06	0.0001336	14	123	HSPA1A,ANPEP,APCS,PPIA,FUCA2,CTSB,F11R,DPP4,ITCH,LAMP1,GSN,P4HB,TMPRSS2,CD81
GO: Biological Process	GO:0051828	entry into other organism involved in symbiotic interaction		5.731e-06	0.0001336	14	123	HSPA1A,ANPEP,APCS,PPIA,FUCA2,CTSB,F11R,DPP4,ITCH,LAMP1,GSN,P4HB,TMPRSS2,CD81
GO: Biological Process	GO:0030260	entry into host cell		5.731e-06	0.0001336	14	123	HSPA1A,ANPEP,APCS,PPIA,FUCA2,CTSB,F11R,DPP4,ITCH,LAMP1,GSN,P4HB,TMPRSS2,CD81
GO: Biological Process	GO:0052192	movement in environment of other organism involved in symbiotic interaction		5.731e-06	0.0001336	14	123	HSPA1A,ANPEP,APCS,PPIA,FUCA2,CTSB,F11R,DPP4,ITCH,LAMP1,GSN,P4HB,TMPRSS2,CD81
GO: Biological Process	GO:0044764	multi-organism cellular process		5.737e-06	0.0001336	43	773	RPLP1,CFL1,TSG101,PFN1,UBA52,MVB12A,HPX,ALB,HSPA1A,HSPA8,VCP,HSP90AB1,ANPEP,APCS,VPS25,PPIA,PPIB,YWHAB,YWHAE,SLPI,CTSB,IL6ST,PSMA4,PSMB1,PSMB2,PSMB3,PSMC3,F11R,RAB7A,RAB1A,VPS37C,DPP4,ITCH,PDCD6IP,LAMP1,VPS37B,GSN,P4HB,TSPAN6,TMPRSS2,CD81,VPS28,LTF
GO: Biological Process	GO:0050727	regulation of inflammatory response		6.333e-06	0.0001469	25	341	A2M,PARK7,SERPINF1,AGT,PLA2G2A,VTN,ANXA1,APCS,APOA1,APOD,CFI,CHID1,IL6ST,PSMA6,ACE,CFB,GGT1,SERPING1,C3,C4A,NOV,GSTP1,LPL,CD59,IL1RL1
GO: Biological Process	GO:0006757	ATP generation from ADP		6.438e-06	0.0001487	11	77	PGAM1,PGK1,PGM1,FBP1,PKM,ALDOA,GAPDH,GPI,LDHA,ENO1,TPI1
GO: Biological Process	GO:0009968	negative regulation of signal transduction		6.486e-06	0.0001488	58	1181	PARK7,CD109,UBA52,FBP1,CLU,AGT,HSPA1A,HSPA5,HSPB1,EZR,HYOU1,OLFM4,APOA1,APOD,YWHAB,ZFYVE28,PPP2R1A,IGFBP4,IGFBP5,SMPD1,IL6ST,LGMN,PSMA2,PSMA4,PSMA5,PSMA6,PSMB1,PSMB2,PSMB3,PSMC3,PSMC4,PSMD5,PSME1,TMBIM1,PTPRF,GLG1,RAB7A,TWSG1,NOV,GPC1,ITCH,PDCD6,CALM1,CALR,PRDX2,TMBIM6,ECM1,GSTP1,TGFBR3,THBS1,CD14,TIMP2,PEBP1,TSPAN6,IL1RL1,LTF,CDC42,CDH1
GO: Biological Process	GO:0007167	enzyme linked receptor protein signaling pathway		6.493e-06	0.0001488	52	1016	HEXA,ACTB,CD109,ADAM10,LRG1,UBA52,EFEMP1,MVB12A,PIGR,AGT,MMP2,BAIAP2,HSPA5,SDCBP,HSPB1,HSP90AA1,VTN,FMOD,GDF15,AGR2,APLP2,APOA1,APOD,APP,ARF4,ZFYVE28,IGF2R,IGFBP4,IGFBP5,IL6ST,LGMN,ATP6V1A,IQGAP1,PTN,PTPRF,F11R,GLG1,RAB7A,TWSG1,NOV,GPC1,PDCD6,NCSTN,TF,LEFTY2,TGFBR3,LIFR,THBS1,NAMPT,FSTL1,LNPEP,CDC42
GO: Biological Process	GO:0009894	regulation of catabolic process		6.523e-06	0.0001489	43	777	PARK7,PGAM1,UBA52,FBP1,CLU,UBE2V2,SDCBP,HSPB1,VCP,HSP90AB1,EZR,ANXA2,APOA1,IDH1,APOH,PPP1CB,RUVBL1,CST3,ATP6V1A,PSAP,GAPDH,PSMA2,PSMA4,PSMA5,PSMA6,PSMB1,PSMB2,PSMB3,PSMC3,PSMC4,PSMD5,DBI,PSME1,QSOX1,RAB7A,OS9,ITCH,USP5,TIMP1,TIMP2,CD81,VPS28,CDC42
GO: Biological Process	GO:0051094	positive regulation of developmental process		6.731e-06	0.0001531	63	1323	DDAH1,MAN2A1,SERPINF1,LRG1,CLU,UBE2V2,CLIC1,BASP1,UCHL3,AGT,PLA2G2A,BAIAP2,SERPINF2,HSPA5,SDCBP,HSPB1,ALOX15B,HSP90AA1,EZR,FN1,ADAMTS1,ANXA1,GDF15,ANXA3,WNT7A,AGR2,OLFM4,APOA1,CLSTN1,PPIB,RAB21,CTSH,IL6ST,SPINT1,ERAP1,RAB11A,ACE,IQGAP1,B4GALT1,PTN,NEU1,PTPRF,C3,ADIRF,NME2,CA2,SFN,PNP,GPC1,ITCH,PDCD6,CALR,CAMP,CORO1B,ECM1,TF,THBS1,TIMP2,LPL,EIF5A,LTF,CDC42,AGRN
GO: Biological Process	GO:0007338	single fertilization		6.769e-06	0.0001533	15	142	HEXB,ACR,PARK7,CRISP1,BSPH1,CCT2,ARSA,CCT5,SPINK2,ELSPBP1,B4GALT1,CCT6A,CD9,SERPINA5,SPACA3
GO: Biological Process	GO:0001568	blood vessel development		6.905e-06	0.0001558	38	651	DDAH1,SERPINF1,LRG1,AGT,MMP2,SERPINF2,HSPB1,SEMA3C,ANG,WARS,FN1,ANPEP,ADAMTS1,ANXA2,ANXA3,WNT7A,APOD,APOH,KLK3,PRCP,CTSH,SPINT1,ERAP1,ACE,B4GALT1,PTN,C3,NOV,GPI,PDCD6,CAMP,LAMA5,ECM1,TGFBR3,COL18A1,THBS1,RNH1,CDC42
GO: Biological Process	GO:0042493	response to drug		7.203e-06	0.0001619	31	481	AOC1,PARK7,FBP1,ALAD,ALDH1A1,MMP2,SEMA3C,ANXA1,APOA1,APOD,YWHAZ,SMPD1,SOD1,SORD,MYO6,B2M,PTN,GGH,ADIRF,PNP,RAP1B,CALR,LCN2,LDHA,COL18A1,THBS1,EEF2,TIMP2,LPL,CD38,CDH1
GO: Biological Process	GO:0042063	gliogenesis		7.24e-06	0.0001621	22	279	HEXB,MATN2,EFEMP1,CLU,AGT,VTN,FN1,ANXA1,IL6ST,SOD1,SPINT1,DBI,PHGDH,PTN,GPC1,LAMB2,TF,GSN,GSTP1,MPP5,EEF2,CD9
GO: Biological Process	GO:0031589	cell-substrate adhesion		7.337e-06	0.0001637	24	322	ACTN1,FBLN2,AGT,VCL,VTN,FN1,AGR2,OLFM4,APOA1,ST6GAL1,APOD,LYPD3,EPDR1,SPOCK1,SMOC2,IQGAP1,PTN,RAB1A,CALR,LAMA5,LAMC1,THBS1,CDC42,MSLN
GO: Biological Process	GO:1903321	negative regulation of protein modification by small protein conjugation or removal		7.379e-06	0.000164	15	143	PARK7,UBA52,HSPA1A,PSMA2,PSMA4,PSMA5,PSMA6,PSMB1,PSMB2,PSMB3,PSMC3,PSMC4,PSMD5,PSME1,VPS28
GO: Biological Process	GO:0061045	negative regulation of wound healing		7.47e-06	0.0001647	10	64	CD109,SERPINF2,VTN,ANXA2,ANXA5,APCS,APOH,SERPING1,THBS1,TSPAN8
GO: Biological Process	GO:0001885	endothelial cell development		7.47e-06	0.0001647	10	64	AGT,EZR,WNT7A,F11R,PTPRS,RAB1A,RAP1B,PLOD3,GSTM3,COL18A1
GO: Biological Process	GO:0001736	establishment of planar polarity		7.605e-06	0.0001656	14	126	PFN1,UBA52,PSMA2,PSMA4,PSMA5,PSMA6,PSMB1,PSMB2,PSMB3,PSMC3,PSMC4,PSMD5,PSME1,CDC42
GO: Biological Process	GO:0009132	nucleoside diphosphate metabolic process		7.605e-06	0.0001656	14	126	PGAM1,PGK1,PGM1,FBP1,PKM,ALDOA,CMPK1,GAPDH,CANT1,NME2,GPI,LDHA,ENO1,TPI1
GO: Biological Process	GO:0044419	interspecies interaction between organisms		7.621e-06	0.0001656	44	808	RPLP1,CFL1,TSG101,PFN1,UBA52,MVB12A,HPX,ALB,HSPA1A,HSPA8,VCP,HSP90AB1,ANPEP,APCS,VPS25,PPIA,PPIB,YWHAB,YWHAE,SLPI,FUCA2,CTSB,IL6ST,PSMA4,PSMB1,PSMB2,PSMB3,PSMC3,F11R,RAB7A,RAB1A,VPS37C,DPP4,ITCH,PDCD6IP,CAMP,LAMP1,VPS37B,GSN,P4HB,TMPRSS2,CD81,VPS28,LTF
GO: Biological Process	GO:0044403	symbiont process		7.621e-06	0.0001656	44	808	RPLP1,CFL1,TSG101,PFN1,UBA52,MVB12A,HPX,ALB,HSPA1A,HSPA8,VCP,HSP90AB1,ANPEP,APCS,VPS25,PPIA,PPIB,YWHAB,YWHAE,SLPI,FUCA2,CTSB,IL6ST,PSMA4,PSMB1,PSMB2,PSMB3,PSMC3,F11R,RAB7A,RAB1A,VPS37C,DPP4,ITCH,PDCD6IP,CAMP,LAMP1,VPS37B,GSN,P4HB,TMPRSS2,CD81,VPS28,LTF
GO: Biological Process	GO:0098754	detoxification		8.128e-06	0.0001759	12	94	PARK7,ALB,PRDX5,PRDX6,SOD1,SOD3,GPX3,TXNDC17,PRDX2,GSTM3,GSTT2,PRDX1
GO: Biological Process	GO:0007164	establishment of tissue polarity		8.34e-06	0.0001798	14	127	PFN1,UBA52,PSMA2,PSMA4,PSMA5,PSMA6,PSMB1,PSMB2,PSMB3,PSMC3,PSMC4,PSMD5,PSME1,CDC42
GO: Biological Process	GO:0006094	gluconeogenesis		9.08e-06	0.0001951	12	95	MDH1,PGAM1,PGK1,PGM1,FBP1,ALDOA,GAPDH,FBP2,GOT1,GPI,ENO1,TPI1
GO: Biological Process	GO:0044273	sulfur compound catabolic process		9.35e-06	0.0002001	8	40	HEXA,HEXB,FMOD,GALNS,GGT1,GLB1,GNS,GPC1
GO: Biological Process	GO:0022008	neurogenesis		9.688e-06	0.0002066	73	1628	HEXA,HEXB,MAN2A1,CFL1,MATN2,SERPINF1,ACTB,EFEMP1,CLU,UBE2V2,SPON2,CLN5,HPRT1,AGT,MMP2,BAIAP2,PLS3,VCL,HSP90AA1,EZR,SEMA3C,VTN,FMOD,FN1,ADAMTS1,ANXA1,WNT7A,APOA1,APOD,APP,PPIA,YWHAE,YWHAG,YWHAH,ARF4,RAB21,IL6ST,SOD1,SPINT1,MYO6,SPOCK1,SPR,B2M,NAGLU,RAB11A,DBI,ACE,PHGDH,IQGAP1,PTN,RAB10,NEU1,PTPRF,KIF5B,NME2,RAB3A,GPC1,CALR,LAMB2,LAMC1,CRTAC1,TF,GSN,GSTP1,LIFR,MPP5,EEF2,CD9,TIMP2,PROX2,CDC42,CDH1,A…
GO: Biological Process	GO:0072376	protein activation cascade		9.932e-06	0.000211	13	112	A2M,IGLL5,CLU,VTN,APOH,KLK3,CFI,PRCP,CFB,SERPING1,C3,C4A,CD59
GO: Biological Process	GO:0002757	immune response-activating signal transduction		1.078e-05	0.0002279	30	467	HSP90B1,ACTB,REG3G,IGLL5,UBA52,BAIAP2,HSPA1A,HSP90AA1,HSP90AB1,EZR,CTSB,CTSL,LGMN,PSMA2,PSMA4,PSMA5,PSMA6,PSMB1,PSMB2,PSMB3,PSMC3,PSMC4,PSMD5,PSME1,ITCH,CD14,CD38,TSPAN6,LTF,CDC42
GO: Biological Process	GO:0034976	response to endoplasmic reticulum stress		1.08e-05	0.0002279	21	265	AARS,HSP90B1,PARK7,DNAJB9,TPP1,HSPA1A,HSPA5,VCP,HYOU1,AGR2,DNAJC3,PSMC3,PSMC4,OS9,FAM129A,CALR,TMBIM6,PDIA3,THBS1,EEF2,P4HB
GO: Biological Process	GO:0009967	positive regulation of signal transduction		1.103e-05	0.0002318	68	1488	PARK7,ACPP,LRG1,TXN,UBA52,CLU,AGT,HPX,PLA2G2A,SERPINF2,HSPA1A,SDCBP,ALOX15B,VTN,GDF15,WNT7A,AGR2,APOA1,YWHAB,YWHAE,YWHAG,YWHAH,YWHAZ,RHOC,CARTPT,PPP2R1A,IGFBP4,IGFBP5,CTSH,IL6ST,SOD1,PSAP,PSMA2,PSMA4,PSMA5,PSMA6,PSMB1,STARD10,PSMB2,PSMB3,PSMC3,PSMC4,PSMD5,PSME1,IQGAP1,CANT1,C3,TWSG1,YWHAQ,NOV,SFN,RAP1B,CALM1,CALR,PRDX2,ECM1,TF,PDIA3,GSN,LEFTY2,TGFBR3,THBS1,TIMP2,PEBP1,TSPAN6,CD81,LTF,CDC42
GO: Biological Process	GO:1903362	regulation of cellular protein catabolic process		1.133e-05	0.0002372	22	287	PARK7,UBA52,CLU,UBE2V2,SDCBP,VCP,HSP90AB1,EZR,ANXA2,PSMA2,PSMA4,PSMA5,PSMA6,PSMB1,PSMB2,PSMB3,PSMC3,PSMC4,PSMD5,PSME1,USP5,CD81
GO: Biological Process	GO:0017157	regulation of exocytosis		1.15e-05	0.00024	18	205	TSG101,CRISP1,SDCBP,ANXA1,RAB3D,RAB21,SPINK2,B4GALT1,RAB7A,RAB3A,RAB3B,RAB27A,RAB27B,RAP1B,PDCD6IP,LAMP1,SYT7,SYTL1
GO: Biological Process	GO:1900739	regulation of protein insertion into mitochondrial membrane involved in apoptotic signaling pathway		1.163e-05	0.000241	7	30	YWHAB,YWHAE,YWHAG,YWHAH,YWHAZ,YWHAQ,SFN
GO: Biological Process	GO:1900740	positive regulation of protein insertion into mitochondrial membrane involved in apoptotic signaling pathway		1.163e-05	0.000241	7	30	YWHAB,YWHAE,YWHAG,YWHAH,YWHAZ,YWHAQ,SFN
GO: Biological Process	GO:0045732	positive regulation of protein catabolic process		1.282e-05	0.0002647	21	268	UBA52,CLU,UBE2V2,VCP,EZR,PSMA2,PSMA4,PSMA5,PSMA6,PSMB1,PSMB2,PSMB3,PSMC3,PSMC4,PSMD5,PSME1,RAB7A,ITCH,USP5,CD81,VPS28
GO: Biological Process	GO:0007173	epidermal growth factor receptor signaling pathway		1.305e-05	0.0002684	14	132	UBA52,EFEMP1,MVB12A,PIGR,AGT,AGR2,APLP2,APP,ARF4,ZFYVE28,IQGAP1,PTPRF,RAB7A,CDC42
GO: Biological Process	GO:0002673	regulation of acute inflammatory response		1.345e-05	0.0002758	11	83	A2M,VTN,APCS,CFI,IL6ST,CFB,SERPING1,C3,C4A,GSTP1,CD59
GO: Biological Process	GO:0009636	response to toxic substance		1.357e-05	0.0002771	21	269	EPHX2,AOC1,PARK7,ALAD,ALB,PRDX5,HSPA5,HSP90AA1,PRDX6,SOD1,SOD3,RAB10,GPX3,TXNDC17,PRDX2,LCN2,GSTM3,GSTP1,GSTT2,PRDX1,CDH1
GO: Biological Process	GO:1990182	exosomal secretion		1.415e-05	0.0002881	6	21	TSG101,SDCBP,RAB11A,RAB7A,RAB27A,PDCD6IP
GO: Biological Process	GO:0071248	cellular response to metal ion		1.43e-05	0.0002901	15	151	AOC1,SERPINF1,FBP1,ALAD,HSPA5,FN1,ANXA5,SOD1,B2M,IQGAP1,GLRA2,CALR,TF,GSN,CDH1
GO: Biological Process	GO:0007155	cell adhesion		1.457e-05	0.0002946	69	1530	ACTB,ACTN1,ADAM10,MFAP4,FBLN2,CLIC1,SPON2,AGT,MMP2,SERPINF2,HSPB1,VCL,HSP90AA1,EZR,COL6A2,COL12A1,VTN,FN1,ANXA1,AGR2,OLFM4,APOA1,ST6GAL1,PODXL2,APOD,APP,CLSTN1,PPP1CB,PPP2R1A,LYPD3,EPDR1,IL6ST,SOD1,SPOCK1,AZGP1,B2M,SMOC2,IQGAP1,B4GALT1,PTN,PTPRF,F11R,PTPRS,NME2,RAB1A,RAB27A,NOV,PNP,DPP4,ITCH,DSC2,CALR,LAMA5,LAMB2,LAMC1,NCSTN,PRDX2,LCP1,GSN,LGALS3BP,GSTP1,COL18A1,THBS1,CD9,CD59,LSAMP,CDC42,CDH1,MS…
GO: Biological Process	GO:0046479	glycosphingolipid catabolic process		1.487e-05	0.0002995	5	13	HEXA,HEXB,NEU1,GLA,GM2A
GO: Biological Process	GO:1901615	organic hydroxy compound metabolic process		1.511e-05	0.0003033	34	573	EPHX2,ACLY,PARK7,TTR,ADH5,CPQ,HPRT1,PLA2G2A,ALDH1A1,APLP2,APOA1,NPC2,MINPP1,APP,CRYM,SMPD1,SOD1,SORD,LGMN,IMPA1,SPR,GC,DBI,DDT,SMPDL3A,GLO1,GOT1,CALM1,SLC44A4,LDHA,LDHB,LDHC,LIPA,TPI1
GO: Biological Process	GO:0045807	positive regulation of endocytosis		1.55e-05	0.0003102	14	134	TSG101,HSPA8,VTN,RAB21,B2M,C3,C4A,RAB27A,CALR,TF,TSPAN1,CD14,VPS28,SPACA3
GO: Biological Process	GO:0006753	nucleoside phosphate metabolic process		1.628e-05	0.0003245	39	702	ACR,PARK7,ACPP,MDH1,PGAM1,PGD,PGK1,PGM1,FBP1,HPRT1,PKM,PGLS,PRDX5,ALDOA,HSPA1A,HSPA8,CAP1,VCP,IDH1,APRT,NT5C2,ATP6V1A,CMPK1,GAPDH,GARS,CANT1,SMPDL3A,NME2,PNP,GPI,CALM1,LDHA,LDHB,LDHC,THBS1,NAMPT,TIMP2,ENO1,TPI1
GO: Biological Process	GO:0001944	vasculature development		1.668e-05	0.0003296	38	677	DDAH1,SERPINF1,LRG1,AGT,MMP2,SERPINF2,HSPB1,SEMA3C,ANG,WARS,FN1,ANPEP,ADAMTS1,ANXA2,ANXA3,WNT7A,APOD,APOH,KLK3,PRCP,CTSH,SPINT1,ERAP1,ACE,B4GALT1,PTN,C3,NOV,GPI,PDCD6,CAMP,LAMA5,ECM1,TGFBR3,COL18A1,THBS1,RNH1,CDC42
GO: Biological Process	GO:0080171	lytic vacuole organization		1.69e-05	0.0003296	9	56	HEXA,HEXB,TPP1,CLN5,HSPA8,GAA,NAGLU,RAB7A,SYT7
GO: Biological Process	GO:0035794	positive regulation of mitochondrial membrane permeability		1.69e-05	0.0003296	9	56	HEBP2,HSPA1A,YWHAB,YWHAE,YWHAG,YWHAH,YWHAZ,YWHAQ,SFN
GO: Biological Process	GO:0007040	lysosome organization		1.69e-05	0.0003296	9	56	HEXA,HEXB,TPP1,CLN5,HSPA8,GAA,NAGLU,RAB7A,SYT7
GO: Biological Process	GO:0048857	neural nucleus development		1.694e-05	0.0003296	10	70	ACTB,CKB,BASP1,HSPA5,YWHAE,YWHAH,YWHAQ,CALM1,LDHA,CDC42
GO: Biological Process	GO:0046031	ADP metabolic process		1.694e-05	0.0003296	11	85	PGAM1,PGK1,PGM1,FBP1,PKM,ALDOA,GAPDH,GPI,LDHA,ENO1,TPI1
GO: Biological Process	GO:0006689	ganglioside catabolic process		1.698e-05	0.0003296	4	7	HEXA,HEXB,NEU1,GM2A
GO: Biological Process	GO:0019249	lactate biosynthetic process		1.698e-05	0.0003296	4	7	PARK7,LDHA,LDHB,LDHC
GO: Biological Process	GO:0044803	multi-organism membrane organization		1.836e-05	0.0003528	7	32	TSG101,MVB12A,PPIA,VPS37C,PDCD6IP,VPS37B,VPS28
GO: Biological Process	GO:0001844	protein insertion into mitochondrial membrane involved in apoptotic signaling pathway		1.836e-05	0.0003528	7	32	YWHAB,YWHAE,YWHAG,YWHAH,YWHAZ,YWHAQ,SFN
GO: Biological Process	GO:0061041	regulation of wound healing		1.836e-05	0.0003528	14	136	CD109,REG3G,SERPINF2,VTN,ANXA1,ANXA2,ANXA5,APCS,APOH,SERPING1,PRDX2,GSN,THBS1,TSPAN8
GO: Biological Process	GO:0016032	viral process		1.897e-05	0.000363	41	759	RPLP1,CFL1,TSG101,PFN1,UBA52,MVB12A,HPX,HSPA1A,HSPA8,VCP,HSP90AB1,ANPEP,APCS,VPS25,PPIA,PPIB,YWHAB,YWHAE,SLPI,CTSB,IL6ST,PSMA4,PSMB1,PSMB2,PSMB3,PSMC3,F11R,RAB7A,RAB1A,VPS37C,DPP4,ITCH,PDCD6IP,LAMP1,VPS37B,GSN,P4HB,TMPRSS2,CD81,VPS28,LTF
GO: Biological Process	GO:0039702	viral budding via host ESCRT complex		1.902e-05	0.000363	6	22	TSG101,MVB12A,VPS37C,PDCD6IP,VPS37B,VPS28
GO: Biological Process	GO:0031399	regulation of protein modification process		1.94e-05	0.000369	79	1841	HSP90B1,RPLP1,PARK7,CD109,TSG101,TXN,UBA52,CLU,AGT,HPX,PLA2G2A,SERPINF2,HSPA1A,HSPA2,HSPA5,SDCBP,HSPB1,VCP,HSP90AA1,HSP90AB1,EZR,VTN,ANG,FN1,GDF15,ANXA2,WNT7A,APLP2,APOA1,APP,PPIB,YWHAB,YWHAE,YWHAG,ZFYVE28,PPP1R7,CARTPT,PPP2R1A,IGFBP4,PRKAR2A,SMPD1,DNAJC3,IL6ST,SOD1,PSAP,PSMA2,PSMA4,PSMA5,PSMA6,PSMB1,PSMB2,PSMB3,PSMC3,PSMC4,PSMD5,PSME1,ACE,IQGAP1,TEX101,C3,SFN,FAM129A,RAP1B,ITCH,CALM1,CAMP,PRDX2,…
GO: Biological Process	GO:0043900	regulation of multi-organism process		2.027e-05	0.000384	31	507	CFL1,TSG101,MDH1,PFN1,PGC,UBA52,MVB12A,CRISP1,ANXA5,APCS,VPS25,PPIA,PPIB,PPP2R1A,SLPI,FUCA2,SPINK2,B2M,PTGDS,B4GALT1,RAB7A,ITCH,CAMP,PRDX2,VPS37B,GSN,TIMP1,P4HB,TSPAN6,TMPRSS2,LTF
GO: Biological Process	GO:0044262	cellular carbohydrate metabolic process		2.032e-05	0.000384	23	320	PGAM1,PGD,PGM1,UBA52,FBP1,UGP2,IDH1,PPP1CB,IGFBP4,IGFBP5,PTGES3,IL6ST,GAA,SORD,IMPA1,GNPTG,B4GALT1,GLB1,PYGB,GOT1,CALM1,NANS,TPI1
GO: Biological Process	GO:0051443	positive regulation of ubiquitin-protein transferase activity		2.092e-05	0.0003941	12	103	UBA52,PSMA2,PSMA4,PSMA5,PSMA6,PSMB1,PSMB2,PSMB3,PSMC3,PSMC4,PSMD5,PSME1
GO: Biological Process	GO:0046718	viral entry into host cell		2.106e-05	0.0003943	13	120	HSPA1A,ANPEP,APCS,PPIA,CTSB,F11R,DPP4,ITCH,LAMP1,GSN,P4HB,TMPRSS2,CD81
GO: Biological Process	GO:0051438	regulation of ubiquitin-protein transferase activity		2.106e-05	0.0003943	13	120	PARK7,UBA52,PSMA2,PSMA4,PSMA5,PSMA6,PSMB1,PSMB2,PSMB3,PSMC3,PSMC4,PSMD5,PSME1
GO: Biological Process	GO:0098869	cellular oxidant detoxification		2.119e-05	0.0003954	11	87	PARK7,ALB,PRDX5,PRDX6,SOD1,SOD3,GPX3,TXNDC17,PRDX2,GSTT2,PRDX1
GO: Biological Process	GO:0042180	cellular ketone metabolic process		2.144e-05	0.0003989	20	256	PARK7,AGT,ANXA1,APOA1,AKR7A2,PSMA2,PSMA4,PSMA5,PSMA6,PSMB1,PSMB2,PSMB3,PSMC3,PSMC4,PSMD5,DBI,PSME1,GLO1,GPI,CBR1
GO: Biological Process	GO:0040007	growth		2.251e-05	0.0004174	53	1091	TSG101,ADAM10,FBP1,CPQ,BASP1,AGT,PKM,SDCBP,VCL,ALOX15B,EZR,ATRN,SELENOP,SEMA3C,FMOD,FN1,ANXA1,WNT7A,AGR2,APOD,APP,CLSTN1,PPIB,PPP2R1A,IGFBP4,RUVBL1,IGFBP5,RAB21,SOD1,LGMN,PSAP,SPOCK1,SPR,AZGP1,RAB11A,CREG1,IQGAP1,C3,NOV,SFN,ITCH,CAMP,LAMB2,SLC44A4,GSN,LEFTY2,TGFBR3,THBS1,CD38,CD81,CDC42,ENO1,AGRN
GO: Biological Process	GO:0051204	protein insertion into mitochondrial membrane		2.276e-05	0.00042	7	33	YWHAB,YWHAE,YWHAG,YWHAH,YWHAZ,YWHAQ,SFN
GO: Biological Process	GO:0071241	cellular response to inorganic substance		2.279e-05	0.00042	16	176	AOC1,SERPINF1,FBP1,ALAD,HSPA5,FN1,ANXA5,SOD1,B2M,IQGAP1,GLRA2,CALR,TF,GSN,THBS1,CDH1
GO: Biological Process	GO:0044255	cellular lipid metabolic process		2.302e-05	0.0004225	52	1064	HEXA,HEXB,EPHX2,ACLY,TTR,ADH5,FASN,PLAA,PLA1A,LIPG,AGT,PLA2G2A,ALDH1A1,ALOX15B,ANG,ANXA1,APOA1,NPC2,IDH1,APOD,APOH,KLK3,ARF3,PPP2R1A,ARSA,PLPP1,ASAH1,SMPD1,PTGES3,IL6ST,IMPA1,PSAP,DBI,PTGDS,GGT1,NEU1,GLA,GLB1,SMPDL3A,RAB7A,GM2A,C3,GPC1,SLC44A4,CBR1,LIPA,NANS,LPL,SCPEP1,CD81,CDC42,AGRN
GO: Biological Process	GO:0002223	stimulatory C-type lectin receptor signaling pathway		2.308e-05	0.0004225	12	104	UBA52,PSMA2,PSMA4,PSMA5,PSMA6,PSMB1,PSMB2,PSMB3,PSMC3,PSMC4,PSMD5,PSME1
GO: Biological Process	GO:0006629	lipid metabolic process		2.324e-05	0.0004237	63	1377	HEXA,HEXB,EPHX2,ACAT2,ACLY,GOLM1,TTR,ADH5,FASN,PLAA,PLA1A,CLU,LIPG,TPP1,AGT,PLA2G2A,ALDH1A1,ALOX15B,ANG,ANXA1,APLP2,APOA1,NPC2,IDH1,APOD,APOH,APP,KLK3,YWHAH,PRDX6,ARF3,PPP2R1A,ARSA,PLPP1,ASAH1,SMPD1,PTGES3,IL6ST,SOD1,LGMN,IMPA1,PSAP,GC,DBI,PTGDS,GGT1,NEU1,GLA,GLB1,SMPDL3A,RAB7A,GM2A,C3,GPC1,SLC44A4,CBR1,LIPA,NANS,LPL,SCPEP1,CD81,CDC42,AGRN
GO: Biological Process	GO:1901028	regulation of mitochondrial outer membrane permeabilization involved in apoptotic signaling pathway		2.329e-05	0.0004237	8	45	HSPA1A,YWHAB,YWHAE,YWHAG,YWHAH,YWHAZ,YWHAQ,SFN
GO: Biological Process	GO:1901184	regulation of ERBB signaling pathway		2.364e-05	0.0004287	11	88	UBA52,MVB12A,AGT,AGR2,APLP2,APP,ZFYVE28,LGMN,PTPRF,RAB7A,CDC42
GO: Biological Process	GO:0006687	glycosphingolipid metabolic process		2.469e-05	0.0004463	10	73	HEXA,HEXB,ARSA,ASAH1,SMPD1,PSAP,NEU1,GLA,GLB1,GM2A
GO: Biological Process	GO:0008217	regulation of blood pressure		2.508e-05	0.0004521	17	197	EPHX2,DDAH1,ADH5,AGT,MME,SERPINF2,KLK3,SLC2A5,CARTPT,PRCP,CTSZ,SOD1,ERAP1,ACE,F11R,LNPEP,SCPEP1
GO: Biological Process	GO:0030334	regulation of cell migration		2.516e-05	0.0004522	40	742	SERPINF1,PFN1,ADAM10,EFEMP1,AGT,MMP2,HSPA5,SDCBP,HSPB1,VCL,ALOX15B,SEMA3C,VTN,FN1,ANXA1,ANXA3,WNT7A,OLFM4,APOD,APOH,IGFBP5,PRCP,CTSH,IL6ST,RAB11A,ACE,IQGAP1,PTN,NOV,PDCD6,CALR,LAMA5,CORO1B,ECM1,GSN,TGFBR3,COL18A1,THBS1,TIMP1,CDH1
GO: Biological Process	GO:0006091	generation of precursor metabolites and energy		2.526e-05	0.0004525	26	393	ACO1,PARK7,MDH1,PGAM1,PGK1,PGM1,UBA52,FBP1,UGP2,PKM,FH,ALDOA,VCP,IDH1,PPP1CB,PTGES3,IL6ST,GAA,CYB561,GAPDH,PYGB,GPI,CALM1,LDHA,ENO1,TPI1
GO: Biological Process	GO:0044703	multi-organism reproductive process		2.534e-05	0.0004525	51	1040	HEXA,HEXB,A2M,ACR,PARK7,WFDC2,CRISP1,BSPH1,AGT,MMP2,HSPA2,SEMG1,SELENOP,ANG,ADAMTS1,APLP2,CCT2,APP,PPP2R1A,ARSA,IGF2R,RUVBL1,IGFBP5,PLPP1,CCT5,CTSB,SOD1,SPINK2,ACRBP,GC,PTGDS,ACE,ELSPBP1,GGT1,B4GALT1,EDDM3A,CALR,LAMP1,TMBIM6,TGM4,CCT6A,NAMPT,CD9,TIMP1,ADGRG2,LNPEP,PEBP1,CD38,CDH1,SERPINA5,SPACA3
GO: Biological Process	GO:0051347	positive regulation of transferase activity		2.606e-05	0.0004641	37	665	RPLP1,PARK7,TXN,UBA52,CLU,AGT,HSPA2,HSPA5,HSP90AB1,ANG,APOA1,CCT2,KLK3,CARTPT,PRKAR2A,SOD1,PSMA2,PSMA4,PSMA5,PSMA6,PSMB1,PSMB2,PSMB3,PSMC3,PSMC4,PSMD5,PSME1,ACE,IQGAP1,CALM1,PRDX2,TF,THBS1,CD81,LTF,CDC42,AGRN
GO: Biological Process	GO:0045765	regulation of angiogenesis		2.697e-05	0.0004787	19	239	DDAH1,SERPINF1,LRG1,AGT,HSPB1,WARS,ADAMTS1,ANXA3,APOH,KLK3,CTSH,ERAP1,PTN,C3,PDCD6,CAMP,ECM1,THBS1,RNH1
GO: Biological Process	GO:0051241	negative regulation of multicellular organismal process		2.735e-05	0.000484	54	1127	SERPINF1,REG3G,UBA52,EFEMP1,AGT,MMP2,SERPINF2,EZR,SEMA3C,VTN,FN1,ANPEP,ADAMTS1,ANXA1,ANXA2,ANXA4,WNT7A,ANXA5,APCS,APOA1,CPE,APOD,APOH,APP,KLK3,YWHAH,CARTPT,IGFBP5,CST3,CHID1,SOD1,LGMN,SPOCK1,B2M,PTGDS,PTN,SERPING1,TWSG1,NME2,NOV,ITCH,CALR,PRDX2,ECM1,GSTP1,TGFBR3,ORM1,THBS1,TIMP1,LMO2,CD38,TSPAN8,IL1RL1,LTF
GO: Biological Process	GO:0051340	regulation of ligase activity		2.745e-05	0.0004844	13	123	PARK7,UBA52,PSMA2,PSMA4,PSMA5,PSMA6,PSMB1,PSMB2,PSMB3,PSMC3,PSMC4,PSMD5,PSME1
GO: Biological Process	GO:0031100	animal organ regeneration		2.928e-05	0.000515	11	90	PKM,VTN,ANXA3,APOA1,APOH,IGF2R,ACE,LCP1,GSTP1,TGFBR3,LIFR
GO: Biological Process	GO:0090263	positive regulation of canonical Wnt signaling pathway		2.993e-05	0.0005249	13	124	UBA52,WNT7A,PSMA2,PSMA4,PSMA5,PSMA6,PSMB1,PSMB2,PSMB3,PSMC3,PSMC4,PSMD5,PSME1
GO: Biological Process	GO:1903052	positive regulation of proteolysis involved in cellular protein catabolic process		3.008e-05	0.0005259	16	180	UBA52,CLU,UBE2V2,VCP,PSMA2,PSMA4,PSMA5,PSMA6,PSMB1,PSMB2,PSMB3,PSMC3,PSMC4,PSMD5,PSME1,USP5
GO: Biological Process	GO:0034329	cell junction assembly		3.045e-05	0.0005308	17	200	ACTB,ACTN1,AGT,VCL,FN1,APOD,RHOC,ACE,IQGAP1,F11R,RAP1B,LAMA5,LAMC1,MPP5,THBS1,CD9,CDH1
GO: Biological Process	GO:0002220	innate immune response activating cell surface receptor signaling pathway		3.077e-05	0.0005347	12	107	UBA52,PSMA2,PSMA4,PSMA5,PSMA6,PSMB1,PSMB2,PSMB3,PSMC3,PSMC4,PSMD5,PSME1
GO: Biological Process	GO:0046514	ceramide catabolic process		3.317e-05	0.0005731	5	15	HEXA,HEXB,NEU1,GLA,GM2A
GO: Biological Process	GO:0019377	glycolipid catabolic process		3.317e-05	0.0005731	5	15	HEXA,HEXB,NEU1,GLA,GM2A
GO: Biological Process	GO:0043065	positive regulation of apoptotic process		3.573e-05	0.0006154	36	649	PARK7,UBA52,CLU,AGT,ALDH1A1,MMP2,VCP,ANXA1,ANXA5,YWHAB,YWHAE,YWHAG,YWHAH,YWHAZ,PPP2R1A,IGF2R,SMPD1,CTSH,SOD1,ACE,B4GALT1,PTN,PTPRF,YWHAQ,SFN,PDCD6,ARHGEF12,NCSTN,LDHA,PDIA3,GSN,COL18A1,THBS1,EIF5A,CDC42,AGRN
GO: Biological Process	GO:0051351	positive regulation of ligase activity		3.706e-05	0.0006345	12	109	UBA52,PSMA2,PSMA4,PSMA5,PSMA6,PSMB1,PSMB2,PSMB3,PSMC3,PSMC4,PSMD5,PSME1
GO: Biological Process	GO:0045446	endothelial cell differentiation		3.706e-05	0.0006345	12	109	AGT,EZR,WNT7A,PTN,F11R,PTPRS,RAB1A,RAP1B,PLOD3,LAMA5,GSTM3,COL18A1
GO: Biological Process	GO:1901701	cellular response to oxygen-containing compound		3.85e-05	0.0006566	49	1001	HSP90B1,AOC1,PARK7,SERPINF1,TXN,SPON2,UCHL3,AGT,MMP2,BAIAP2,PRDX5,EZR,FN1,ADAMTS1,ANXA1,ANXA5,APP,APRT,YWHAG,SLC2A5,IGFBP5,PRKAR2A,SOD1,SOD3,ATP6V1A,PSAP,B2M,PTN,RAB10,PTPRF,GLRA2,KIF5B,GNB1,GNB2,GOT1,CA2,RAP1B,PRDX2,LCN2,PDIA3,GSTP1,THBS1,NAMPT,CD14,PRDX1,IL1RL1,LTF,CDH1,AGRN
GO: Biological Process	GO:0044259	multicellular organismal macromolecule metabolic process		3.857e-05	0.0006566	13	127	MFAP4,MMP2,PRDX5,SERPINF2,COL6A2,COL12A1,CST3,CTSB,CTSD,CTSL,ACE,TGFBR3,COL18A1
GO: Biological Process	GO:0006898	receptor-mediated endocytosis		3.898e-05	0.0006617	22	311	HSP90B1,HPX,ALB,SDCBP,CAP1,HSP90AA1,EZR,VTN,HYOU1,ANXA2,APOA1,CFI,IGF2R,RAB21,B2M,CALR,TF,LGALS3BP,CD9,CD14,TMPRSS2,CD81
GO: Biological Process	GO:0055072	iron ion homeostasis		3.96e-05	0.0006701	10	77	ACO1,HPX,CP,SOD1,B2M,STEAP2,STEAP4,LCN2,TF,LTF
GO: Biological Process	GO:1903320	regulation of protein modification by small protein conjugation or removal		4.146e-05	0.0006996	21	290	PARK7,UBA52,CLU,HSPA1A,HSPA5,VCP,HSP90AA1,HSP90AB1,PSMA2,PSMA4,PSMA5,PSMA6,PSMB1,PSMB2,PSMB3,PSMC3,PSMC4,PSMD5,PSME1,ITCH,VPS28
GO: Biological Process	GO:1903035	negative regulation of response to wounding		4.203e-05	0.0007031	16	185	SERPINF1,CD109,SERPINF2,VTN,ANXA2,ANXA5,APCS,APOA1,APOD,APOH,CHID1,SERPING1,NOV,GSTP1,THBS1,TSPAN8
GO: Biological Process	GO:0046755	viral budding		4.215e-05	0.0007031	6	25	TSG101,MVB12A,VPS37C,PDCD6IP,VPS37B,VPS28
GO: Biological Process	GO:1902590	multi-organism organelle organization		4.215e-05	0.0007031	6	25	TSG101,MVB12A,VPS37C,PDCD6IP,VPS37B,VPS28
GO: Biological Process	GO:0018198	peptidyl-cysteine modification		4.215e-05	0.0007031	6	25	PARK7,ADH5,RAB3D,GAPDH,ACE,RAB3B
GO: Biological Process	GO:0030100	regulation of endocytosis		4.262e-05	0.000709	18	226	TSG101,HSPA8,SDCBP,VTN,ANXA2,OLFM4,RAB21,B2M,C3,C4A,RAB27A,CALR,SYT7,TF,TSPAN1,CD14,VPS28,SPACA3
GO: Biological Process	GO:0043068	positive regulation of programmed cell death		4.323e-05	0.0007171	36	655	PARK7,UBA52,CLU,AGT,ALDH1A1,MMP2,VCP,ANXA1,ANXA5,YWHAB,YWHAE,YWHAG,YWHAH,YWHAZ,PPP2R1A,IGF2R,SMPD1,CTSH,SOD1,ACE,B4GALT1,PTN,PTPRF,YWHAQ,SFN,PDCD6,ARHGEF12,NCSTN,LDHA,PDIA3,GSN,COL18A1,THBS1,EIF5A,CDC42,AGRN
GO: Biological Process	GO:0009161	ribonucleoside monophosphate metabolic process		4.359e-05	0.0007209	21	291	PARK7,PGAM1,PGK1,PGM1,FBP1,HPRT1,PKM,ALDOA,HSPA1A,HSPA8,VCP,APRT,NT5C2,ATP6V1A,CMPK1,GAPDH,GPI,LDHA,LDHC,ENO1,TPI1
GO: Biological Process	GO:0035036	sperm-egg recognition		4.434e-05	0.0007307	8	49	ACR,CRISP1,CCT2,ARSA,CCT5,B4GALT1,CCT6A,SPACA3
GO: Biological Process	GO:0010811	positive regulation of cell-substrate adhesion		4.443e-05	0.0007307	12	111	FBLN2,VTN,FN1,AGR2,OLFM4,APOA1,SMOC2,IQGAP1,PTN,CALR,THBS1,CDC42
GO: Biological Process	GO:0055086	nucleobase-containing small molecule metabolic process		4.686e-05	0.0007682	40	763	ACR,PARK7,ACPP,MDH1,PGAM1,PGD,PGK1,PGM1,TXN,FBP1,HPRT1,PKM,PGLS,PRDX5,ALDOA,HSPA1A,HSPA8,CAP1,VCP,IDH1,APRT,NT5C2,ATP6V1A,CMPK1,GAPDH,GARS,CANT1,SMPDL3A,NME2,PNP,GPI,CALM1,LDHA,LDHB,LDHC,THBS1,NAMPT,TIMP2,ENO1,TPI1
GO: Biological Process	GO:0030203	glycosaminoglycan metabolic process		4.697e-05	0.0007682	15	167	HEXA,HEXB,B4GALT5,UGDH,FMOD,FUCA1,GALNS,NAGLU,B4GALT1,GLB1,SPOCK3,GNS,GPC1,AGRN,SPACA3
GO: Biological Process	GO:0006000	fructose metabolic process		4.719e-05	0.0007696	5	16	FBP1,ALDH1A1,ALDOA,SORD,FBP2
GO: Biological Process	GO:0030901	midbrain development		4.871e-05	0.0007921	11	95	ACTB,CKB,BASP1,HSPA5,APLP2,YWHAE,YWHAH,YWHAQ,CALM1,LDHA,CDC42
GO: Biological Process	GO:0007339	binding of sperm to zona pellucida		4.998e-05	0.0008084	7	37	ACR,CRISP1,CCT2,ARSA,CCT5,B4GALT1,CCT6A
GO: Biological Process	GO:1901030	positive regulation of mitochondrial outer membrane permeabilization involved in apoptotic signaling pathway		4.998e-05	0.0008084	7	37	YWHAB,YWHAE,YWHAG,YWHAH,YWHAZ,YWHAQ,SFN
GO: Biological Process	GO:0010565	regulation of cellular ketone metabolic process		5.106e-05	0.0008235	16	188	PARK7,AGT,ANXA1,APOA1,PSMA2,PSMA4,PSMA5,PSMA6,PSMB1,PSMB2,PSMB3,PSMC3,PSMC4,PSMD5,DBI,PSME1
GO: Biological Process	GO:0009141	nucleoside triphosphate metabolic process		5.312e-05	0.0008543	21	295	PARK7,PGAM1,PGK1,PGM1,FBP1,PKM,ALDOA,HSPA1A,HSPA8,VCP,ATP6V1A,CMPK1,GAPDH,SMPDL3A,NME2,PNP,GPI,LDHA,LDHC,ENO1,TPI1
GO: Biological Process	GO:1901657	glycosyl compound metabolic process		5.358e-05	0.0008594	27	435	PARK7,ACPP,PGAM1,PGK1,PGM1,FBP1,HPRT1,PKM,ALDOA,HSPA1A,HSPA8,VCP,APRT,AKR7A2,NT5C2,FUCA1,FUCA2,ATP6V1A,CMPK1,GAPDH,NME2,PNP,GPI,LDHA,LDHC,ENO1,TPI1
GO: Biological Process	GO:0014070	response to organic cyclic compound		5.715e-05	0.0009142	50	1045	HSP90B1,AOC1,ACR,PARK7,SERPINF1,ALAD,MMP2,HSP90AA1,HSP90AB1,EZR,FN1,ADAMTS1,ANXA1,ANXA3,WNT7A,ANXA7,APOA1,IDH1,APP,YWHAH,ARSA,IGFBP5,PLPP1,SMPD1,CTSB,PTGES3,SOD1,PSMB2,GC,PTGDS,PTN,C3,GNB1,GOT1,CA2,GPI,RAP1B,CALM1,CALR,LDHA,PDIA3,GSN,GSTM3,GSTP1,LIFR,THBS1,EEF2,NAMPT,CD38,CDH1
GO: Biological Process	GO:0009628	response to abiotic stimulus		5.748e-05	0.0009169	56	1216	HSP90B1,SERPINF1,ACTB,TXN,MFAP4,UBA52,CLU,AGT,PKM,ALAD,MME,MMP2,PLOD1,HSPA1A,HSPA2,HSPA6,HSPA8,HSP90AA1,HSP90AB1,ANG,HYOU1,ANXA1,ANXA7,APP,YWHAE,PPP1CB,ARSA,CTSB,PTGES3,DNAJC3,SOD1,SOD3,SORD,LGMN,MYO6,GGT1,PTN,F11R,GNB1,ADIRF,RAB3A,CA2,PNP,DPP4,PDCD6,CALM1,TMBIM6,LDHA,TGFBR3,COL18A1,THBS1,CD9,CD14,P4HB,LPL,CD38
GO: Biological Process	GO:1900047	negative regulation of hemostasis		5.973e-05	0.0009476	8	51	SERPINF2,VTN,ANXA2,ANXA5,APOH,SERPING1,THBS1,TSPAN8
GO: Biological Process	GO:0030195	negative regulation of blood coagulation		5.973e-05	0.0009476	8	51	SERPINF2,VTN,ANXA2,ANXA5,APOH,SERPING1,THBS1,TSPAN8
GO: Biological Process	GO:0009117	nucleotide metabolic process		6.03e-05	0.0009527	37	692	ACR,PARK7,ACPP,MDH1,PGAM1,PGD,PGK1,PGM1,FBP1,HPRT1,PKM,PGLS,PRDX5,ALDOA,HSPA1A,HSPA8,CAP1,VCP,IDH1,APRT,NT5C2,ATP6V1A,CMPK1,GAPDH,GARS,NME2,PNP,GPI,CALM1,LDHA,LDHB,LDHC,THBS1,NAMPT,TIMP2,ENO1,TPI1
GO: Biological Process	GO:0007264	small GTPase mediated signal transduction		6.038e-05	0.0009527	33	588	A2M,CFL1,PARK7,FBP1,ARHGAP29,BAIAP2,SDCBP,RAB3D,APOA1,KLK3,RAB6B,ARF3,ARF4,RHOC,RAB21,RAB11A,GDI2,IQGAP1,RAB10,RAB7A,YWHAQ,GNB1,RAB1A,RAB2A,RAB3A,RAB3B,RAB27A,RAB27B,RAP1B,DOCK9,ARHGEF12,TIMP2,CDC42
GO: Biological Process	GO:0040008	regulation of growth		6.309e-05	0.0009928	38	720	TSG101,ADAM10,FBP1,BASP1,AGT,SDCBP,ALOX15B,EZR,ATRN,SEMA3C,FN1,AGR2,APP,CLSTN1,PPIB,PPP2R1A,IGFBP4,RUVBL1,IGFBP5,RAB21,SOD1,LGMN,SPOCK1,SPR,AZGP1,RAB11A,CREG1,C3,NOV,SFN,ITCH,CAMP,SLC44A4,CD38,CD81,CDC42,ENO1,AGRN
GO: Biological Process	GO:0007032	endosome organization		6.51e-05	0.00102	9	66	TSG101,MVB12A,VPS25,RAB11A,RAB27A,VPS37C,PDCD6IP,VPS37B,VPS28
GO: Biological Process	GO:0006089	lactate metabolic process		6.538e-05	0.00102	5	17	PARK7,GLO1,LDHA,LDHB,LDHC
GO: Biological Process	GO:0046689	response to mercury ion		6.538e-05	0.00102	5	17	PARK7,ALAD,ALB,FN1,GSTP1
GO: Biological Process	GO:0048878	chemical homeostasis		6.575e-05	0.001021	53	1136	HEXB,EPHX2,HSP90B1,ACO1,SERPINF1,CKB,LIPG,CLN5,AGT,HPX,FN1,ANPEP,ANXA7,CP,APLP2,APOA1,NPC2,APP,CLSTN1,CARTPT,IGFBP5,PRCP,PRKAR2A,CTSH,IL6ST,SOD1,ATP6V1A,B2M,RAB11A,DBI,STEAP2,TEX101,RAB7A,KIF5B,GNB1,GOT1,CA2,CA4,SFN,GPI,CACNA2D1,CALM1,CALR,STEAP4,LCN2,TMBIM6,TF,GSTP1,LPL,CD38,EIF5A,LTF,CDH1
GO: Biological Process	GO:0010942	positive regulation of cell death		6.594e-05	0.001021	37	695	HEBP2,PARK7,UBA52,CLU,AGT,ALDH1A1,MMP2,VCP,ANXA1,ANXA5,YWHAB,YWHAE,YWHAG,YWHAH,YWHAZ,PPP2R1A,IGF2R,SMPD1,CTSH,SOD1,ACE,B4GALT1,PTN,PTPRF,YWHAQ,SFN,PDCD6,ARHGEF12,NCSTN,LDHA,PDIA3,GSN,COL18A1,THBS1,EIF5A,CDC42,AGRN
GO: Biological Process	GO:0051701	interaction with host		6.595e-05	0.001021	15	172	ALB,HSPA1A,ANPEP,APCS,PPIA,FUCA2,CTSB,F11R,DPP4,ITCH,LAMP1,GSN,P4HB,TMPRSS2,CD81
GO: Biological Process	GO:2001235	positive regulation of apoptotic signaling pathway		6.994e-05	0.00108	16	193	PARK7,CLU,AGT,YWHAB,YWHAE,YWHAG,YWHAH,YWHAZ,PPP2R1A,CTSH,SOD1,YWHAQ,SFN,PDIA3,GSN,THBS1
GO: Biological Process	GO:1903318	negative regulation of protein maturation		7.128e-05	0.001095	7	39	A2M,SERPINF2,GLG1,SERPING1,THBS1,CD59,CDH1
GO: Biological Process	GO:0010955	negative regulation of protein processing		7.128e-05	0.001095	7	39	A2M,SERPINF2,GLG1,SERPING1,THBS1,CD59,CDH1
GO: Biological Process	GO:0009167	purine ribonucleoside monophosphate metabolic process		7.231e-05	0.001108	20	279	PARK7,PGAM1,PGK1,PGM1,FBP1,HPRT1,PKM,ALDOA,HSPA1A,HSPA8,VCP,APRT,NT5C2,ATP6V1A,GAPDH,GPI,LDHA,LDHC,ENO1,TPI1
GO: Biological Process	GO:0043393	regulation of protein binding		7.438e-05	0.001137	16	194	PARK7,HSPA5,HSP90AB1,VTN,ANXA2,APLP2,APP,SLPI,B2M,ACE,PTPRF,CRTAC1,TMBIM6,TGFBR3,CDC42,AGRN
GO: Biological Process	GO:0019244	lactate biosynthetic process from pyruvate		7.589e-05	0.001153	3	4	LDHA,LDHB,LDHC
GO: Biological Process	GO:0009126	purine nucleoside monophosphate metabolic process		7.597e-05	0.001153	20	280	PARK7,PGAM1,PGK1,PGM1,FBP1,HPRT1,PKM,ALDOA,HSPA1A,HSPA8,VCP,APRT,NT5C2,ATP6V1A,GAPDH,GPI,LDHA,LDHC,ENO1,TPI1
GO: Biological Process	GO:0034330	cell junction organization		7.624e-05	0.001153	19	258	ACTB,ACTN1,AGT,VCL,ANG,FN1,APOD,RHOC,ACE,IQGAP1,F11R,RAP1B,LAMA5,LAMC1,MPP5,THBS1,CD9,CDC42,CDH1
GO: Biological Process	GO:0001101	response to acid chemical		7.626e-05	0.001153	24	372	AARS,CFL1,SERPINF1,ALAD,MMP2,FN1,ADAMTS1,ANXA2,IGF2R,CTSH,PTN,GLRA2,GNB1,TMBIM6,GSN,GSS,GSTP1,TGFBR3,COL18A1,EEF2,CD9,CD38,CDH1,ENO1
GO: Biological Process	GO:0050819	negative regulation of coagulation		7.932e-05	0.00119	8	53	SERPINF2,VTN,ANXA2,ANXA5,APOH,SERPING1,THBS1,TSPAN8
GO: Biological Process	GO:0097345	mitochondrial outer membrane permeabilization		7.932e-05	0.00119	8	53	HSPA1A,YWHAB,YWHAE,YWHAG,YWHAH,YWHAZ,YWHAQ,SFN
GO: Biological Process	GO:0072665	protein localization to vacuole		7.932e-05	0.00119	8	53	HSPA8,EZR,VPS25,GNPTG,RAB7A,LAMP2,CD81,VPS28
GO: Biological Process	GO:0072330	monocarboxylic acid biosynthetic process		8.013e-05	0.001199	17	216	ACLY,PARK7,FASN,AGT,PKM,ALDH1A1,ALOX15B,ANXA1,APOA1,PTGES3,PTGDS,GGT1,LDHA,LDHB,CBR1,LDHC,LPL
GO: Biological Process	GO:0009123	nucleoside monophosphate metabolic process		8.167e-05	0.001219	21	304	PARK7,PGAM1,PGK1,PGM1,FBP1,HPRT1,PKM,ALDOA,HSPA1A,HSPA8,VCP,APRT,NT5C2,ATP6V1A,CMPK1,GAPDH,GPI,LDHA,LDHC,ENO1,TPI1
GO: Biological Process	GO:0006468	protein phosphorylation		8.326e-05	0.001238	80	1952	RPLP1,CFL1,PARK7,STK32B,CD109,TSG101,ADAM10,TXN,UBA52,EFEMP1,CLU,AGT,HPX,PLA2G2A,SERPINF2,HSPA2,HSPA5,HSPA8,SDCBP,HSPB1,HSP90AA1,HSP90AB1,EZR,VTN,ANG,FN1,GDF15,ANXA2,WNT7A,APLP2,APOA1,APP,YWHAB,YWHAG,ZFYVE28,CARTPT,PPP2R1A,IGFBP4,PRKAR2A,SMPD1,CTSH,DNAJC3,IL6ST,SOD1,PSAP,PSMA2,PSMA4,PSMA5,PSMA6,PSMB1,PSMB2,PSMB3,PSMC3,PSMC4,PSMD5,PSME1,ACE,IQGAP1,TEX101,C3,NME2,SFN,FAM129A,RAP1B,ITCH,CALM1,CAMP,P…
GO: Biological Process	GO:0097305	response to alcohol		8.335e-05	0.001238	25	398	SERPINF1,ALAD,ALDH1A1,MMP2,ADAMTS1,ANXA1,WNT7A,ST6GAL1,ARSA,CTSB,SOD1,GC,PTN,GGH,GLRA2,C3,CALM1,CALR,PDIA3,GSN,GSTP1,EEF2,CD14,CD38,CDH1
GO: Biological Process	GO:0043085	positive regulation of catalytic activity		8.481e-05	0.001256	68	1588	A2M,RPLP1,ACR,PARK7,PFN1,TXN,UBA52,PLAA,CLU,AGT,ARHGAP29,ALDH1A1,HSPA1A,HSPA2,HSPA5,HSPA8,CAP1,VCP,HSP90AB1,SEMG1,SEMG2,ANG,FN1,APOA1,CCT2,APOH,APP,KLK3,YWHAB,DIS3,ARF4,RHOC,CARTPT,PRKAR2A,CTSH,SOD1,PSAP,PSMA2,PSMA4,PSMA5,PSMA6,PSMB1,PSMB2,PSMB3,PSMC3,PSMC4,PSMD5,PSME1,ACE,GDI2,IQGAP1,F11R,GM2A,RAB3A,PDCD6,CALM1,DOCK9,ARHGEF12,NCSTN,PRDX2,TF,GSN,THBS1,TIMP2,CD81,LTF,CDC42,AGRN
GO: Biological Process	GO:0009179	purine ribonucleoside diphosphate metabolic process		8.579e-05	0.001261	11	101	PGAM1,PGK1,PGM1,FBP1,PKM,ALDOA,GAPDH,GPI,LDHA,ENO1,TPI1
GO: Biological Process	GO:2000379	positive regulation of reactive oxygen species metabolic process		8.579e-05	0.001261	11	101	DDAH1,PARK7,CLU,AGT,HSP90AA1,HSP90AB1,SOD1,RAB27A,GSTP1,THBS1,EIF5A
GO: Biological Process	GO:0009135	purine nucleoside diphosphate metabolic process		8.579e-05	0.001261	11	101	PGAM1,PGK1,PGM1,FBP1,PKM,ALDOA,GAPDH,GPI,LDHA,ENO1,TPI1
GO: Biological Process	GO:0051338	regulation of transferase activity		8.649e-05	0.001268	48	1006	RPLP1,PARK7,TSG101,TXN,UBA52,CLU,AGT,HSPA2,HSPA5,HSPB1,HSP90AB1,ANG,APLP2,APOA1,CCT2,APP,KLK3,YWHAG,ZFYVE28,CARTPT,PPP2R1A,PRKAR2A,SMPD1,DNAJC3,SOD1,PSMA2,PSMA4,PSMA5,PSMA6,PSMB1,PSMB2,PSMB3,PSMC3,PSMC4,PSMD5,PSME1,ACE,IQGAP1,SFN,CALM1,PRDX2,TF,GSTP1,THBS1,CD81,LTF,CDC42,AGRN
GO: Biological Process	GO:1902110	positive regulation of mitochondrial membrane permeability involved in apoptotic process		9.095e-05	0.001324	8	54	HSPA1A,YWHAB,YWHAE,YWHAG,YWHAH,YWHAZ,YWHAQ,SFN
GO: Biological Process	GO:1902686	mitochondrial outer membrane permeabilization involved in programmed cell death		9.095e-05	0.001324	8	54	HSPA1A,YWHAB,YWHAE,YWHAG,YWHAH,YWHAZ,YWHAQ,SFN
GO: Biological Process	GO:0098657	import into cell		9.095e-05	0.001324	8	54	PARK7,AGT,SLC2A5,B2M,STEAP2,RAB3B,STEAP4,TF
GO: Biological Process	GO:2000377	regulation of reactive oxygen species metabolic process		9.133e-05	0.001326	15	177	DDAH1,PARK7,CLU,AGT,HSP90AA1,HSP90AB1,ARF4,PRCP,SOD1,GLA,RAB27A,PRDX2,GSTP1,THBS1,EIF5A
GO: Biological Process	GO:0042058	regulation of epidermal growth factor receptor signaling pathway		9.325e-05	0.001351	10	85	UBA52,MVB12A,AGT,AGR2,APLP2,APP,ZFYVE28,PTPRF,RAB7A,CDC42
GO: Biological Process	GO:0055076	transition metal ion homeostasis		9.55e-05	0.001377	12	120	ACO1,HPX,CP,APLP2,APP,SOD1,B2M,STEAP2,STEAP4,LCN2,TF,LTF
GO: Biological Process	GO:0019732	antifungal humoral response		9.554e-05	0.001377	4	10	ANG,APP,CAMP,LTF
GO: Biological Process	GO:0009205	purine ribonucleoside triphosphate metabolic process		9.833e-05	0.001414	19	263	PARK7,PGAM1,PGK1,PGM1,FBP1,PKM,ALDOA,HSPA1A,HSPA8,VCP,ATP6V1A,GAPDH,NME2,PNP,GPI,LDHA,LDHC,ENO1,TPI1
GO: Biological Process	GO:0000165	MAPK cascade		0.0001002	0.001436	45	928	TSG101,UBA52,AGT,PLA2G2A,SERPINF2,SDCBP,EZR,FN1,GDF15,WNT7A,APOA1,YWHAB,CARTPT,PPP2R1A,IGFBP4,SMPD1,CTSH,SOD1,PSAP,PSMA2,PSMA4,PSMA5,PSMA6,PSMB1,PSMB2,PSMB3,PSMC3,PSMC4,PSMD5,PSME1,IQGAP1,C3,RAP1B,ITCH,CALM1,PRDX2,TF,LEFTY2,GSTP1,THBS1,TIMP2,PEBP1,PRDX1,CD81,CDC42
GO: Biological Process	GO:0043903	regulation of symbiosis, encompassing mutualism through parasitism		0.0001004	0.001436	17	220	CFL1,TSG101,PFN1,MVB12A,APCS,VPS25,PPIA,PPIB,SLPI,FUCA2,RAB7A,CAMP,VPS37B,GSN,P4HB,TMPRSS2,LTF
GO: Biological Process	GO:0046688	response to copper ion		0.0001032	0.001471	6	29	AOC1,PARK7,CP,SOD1,SOD3,SORD
GO: Biological Process	GO:1901342	regulation of vasculature development		0.0001034	0.001471	19	264	DDAH1,SERPINF1,LRG1,AGT,HSPB1,WARS,ADAMTS1,ANXA3,APOH,KLK3,CTSH,ERAP1,PTN,C3,PDCD6,CAMP,ECM1,THBS1,RNH1
GO: Biological Process	GO:0046902	regulation of mitochondrial membrane permeability		0.000104	0.001477	9	70	HEBP2,HSPA1A,YWHAB,YWHAE,YWHAG,YWHAH,YWHAZ,YWHAQ,SFN
GO: Biological Process	GO:0032963	collagen metabolic process		0.000112	0.001587	12	122	MFAP4,MMP2,PRDX5,SERPINF2,COL6A2,COL12A1,CST3,CTSB,CTSD,CTSL,TGFBR3,COL18A1
GO: Biological Process	GO:0006956	complement activation		0.0001137	0.001606	10	87	A2M,IGLL5,CLU,VTN,CFI,CFB,SERPING1,C3,C4A,CD59
GO: Biological Process	GO:0090130	tissue migration		0.0001145	0.001614	18	244	SERPINF1,ACTG2,PFN1,AGT,HSPB1,ANXA3,WNT7A,APOA1,APOH,PRCP,CTSH,RAB11A,NOV,DPP4,PDCD6,CORO1B,TGFBR3,THBS1
GO: Biological Process	GO:0008015	blood circulation		0.0001171	0.001647	31	557	EPHX2,DDAH1,ADH5,AGT,MME,MMP2,SERPINF2,HSP90AA1,KLK3,YWHAE,SLC2A5,CARTPT,PRCP,CTSZ,GAA,SOD1,ERAP1,ACE,F11R,SERPING1,CACNA2D1,PLOD3,DSC2,CALM1,TGFBR3,LNPEP,PEBP1,CD38,SCPEP1,CDC42,AGRN
GO: Biological Process	GO:0034613	cellular protein localization		0.0001175	0.001649	70	1666	HSP90B1,RPLP1,CFL1,PARK7,PFN1,TXN,UBA52,PIGR,AGT,MLPH,HSPA5,HSPA8,SDCBP,VCL,VCP,HSP90AA1,HSP90AB1,EZR,ANXA2,AGR2,CCT2,CPE,VPS25,APOD,YWHAB,YWHAE,YWHAG,YWHAH,YWHAZ,ARF4,RUVBL1,CCT5,MYO6,RAB11A,GNPTG,TMBIM1,IQGAP1,PTN,RAB10,F11R,RAB7A,OS9,KIF5B,YWHAQ,RAB1A,RAB2A,RAB27A,NOV,SFN,PDCD6,CALR,NUCB1,LAMA5,LAMP1,LAMP2,CORO1B,LCP1,PDIA3,SIL1,GSN,CCT6A,MPP5,PRDX1,EIF5A,CD81,VPS28,SYTL1,CDC42,CDH1,AGRN
GO: Biological Process	GO:0034612	response to tumor necrosis factor		0.0001199	0.00167	19	267	ADAM10,UBA52,HSPA1A,APOA1,PSMA2,PSMA4,PSMA5,PSMA6,PSMB1,PSMB2,PSMB3,PSMC3,PSMC4,PSMD5,PSME1,TXNDC17,GSS,GSTP1,CD14
GO: Biological Process	GO:0031396	regulation of protein ubiquitination		0.0001199	0.00167	19	267	PARK7,UBA52,CLU,HSPA1A,HSPA5,HSP90AA1,HSP90AB1,PSMA2,PSMA4,PSMA5,PSMA6,PSMB1,PSMB2,PSMB3,PSMC3,PSMC4,PSMD5,PSME1,VPS28
GO: Biological Process	GO:1903050	regulation of proteolysis involved in cellular protein catabolic process		0.0001199	0.00167	19	267	PARK7,UBA52,CLU,UBE2V2,SDCBP,VCP,HSP90AB1,PSMA2,PSMA4,PSMA5,PSMA6,PSMB1,PSMB2,PSMB3,PSMC3,PSMC4,PSMD5,PSME1,USP5
GO: Biological Process	GO:0038095	Fc-epsilon receptor signaling pathway		0.0001225	0.001702	13	142	UBA52,PSMA2,PSMA4,PSMA5,PSMA6,PSMB1,PSMB2,PSMB3,PSMC3,PSMC4,PSMD5,PSME1,CALM1
GO: Biological Process	GO:0006066	alcohol metabolic process		0.0001232	0.001708	25	408	EPHX2,ACLY,PARK7,TTR,ADH5,PLA2G2A,ALDH1A1,APLP2,APOA1,NPC2,MINPP1,APP,SMPD1,SOD1,SORD,LGMN,IMPA1,GC,DBI,SMPDL3A,GOT1,CALM1,SLC44A4,LIPA,TPI1
GO: Biological Process	GO:1903530	regulation of secretion by cell		0.0001244	0.001721	38	744	TSG101,FAM3D,CRISP1,AGT,SDCBP,ALOX15B,EZR,ANG,FN1,ANXA1,ANXA4,ANXA5,RAB3D,APOA1,PPIA,CARTPT,RAB21,SPINK2,B4GALT1,RAB7A,KIF5B,RAB3A,RAB3B,RAB27A,RAB27B,NOV,RAP1B,PDCD6IP,CAMP,LAMP1,TMBIM6,SYT7,CD14,PAEP,LPL,CD38,IL1RL1,SYTL1
GO: Biological Process	GO:2000027	regulation of organ morphogenesis		0.0001259	0.001737	19	268	PFN1,UBA52,BASP1,AGT,PSMA2,PSMA4,PSMA5,PSMA6,PSMB1,PSMB2,PSMB3,PSMC3,PSMC4,PSMD5,PSME1,B4GALT1,PTN,CDC42,CDH1
GO: Biological Process	GO:0002064	epithelial cell development		0.0001269	0.001747	18	246	BASP1,AGT,EZR,WNT7A,SOD1,IQGAP1,B4GALT1,F11R,PTPRS,RAB1A,SFN,RAP1B,PLOD3,LAMB2,GSTM3,COL18A1,CDC42,CDH1
GO: Biological Process	GO:0003013	circulatory system process		0.0001289	0.001767	31	560	EPHX2,DDAH1,ADH5,AGT,MME,MMP2,SERPINF2,HSP90AA1,KLK3,YWHAE,SLC2A5,CARTPT,PRCP,CTSZ,GAA,SOD1,ERAP1,ACE,F11R,SERPING1,CACNA2D1,PLOD3,DSC2,CALM1,TGFBR3,LNPEP,PEBP1,CD38,SCPEP1,CDC42,AGRN
GO: Biological Process	GO:0046128	purine ribonucleoside metabolic process		0.000129	0.001767	23	361	PARK7,ACPP,PGAM1,PGK1,PGM1,FBP1,HPRT1,PKM,ALDOA,HSPA1A,HSPA8,VCP,APRT,NT5C2,ATP6V1A,GAPDH,NME2,PNP,GPI,LDHA,LDHC,ENO1,TPI1
GO: Biological Process	GO:0051046	regulation of secretion		0.0001298	0.001774	40	800	TSG101,FAM3D,CRISP1,AGT,SDCBP,ALOX15B,EZR,ANG,FN1,ANPEP,ANXA1,ANXA4,ANXA5,RAB3D,APOA1,PPIA,CARTPT,RAB21,SPINK2,MYO6,B4GALT1,RAB7A,KIF5B,RAB3A,RAB3B,RAB27A,RAB27B,NOV,RAP1B,PDCD6IP,CAMP,LAMP1,TMBIM6,SYT7,CD14,PAEP,LPL,CD38,IL1RL1,SYTL1
GO: Biological Process	GO:0019953	sexual reproduction		0.0001364	0.00186	42	857	HEXA,HEXB,ACR,PARK7,WFDC2,CRISP1,BSPH1,AGT,HSPA2,SEMG1,SELENOP,ANG,ADAMTS1,APLP2,CCT2,APP,PPP2R1A,ARSA,IGF2R,RUVBL1,PLPP1,CCT5,CTSB,SOD1,SPINK2,ACRBP,PTGDS,ACE,ELSPBP1,GGT1,B4GALT1,EDDM3A,CALR,LAMP1,TMBIM6,TGM4,CCT6A,CD9,ADGRG2,PEBP1,SERPINA5,SPACA3
GO: Biological Process	GO:0019725	cellular homeostasis		0.0001372	0.001867	43	885	HEXB,EPHX2,HSP90B1,ACO1,SERPINF1,TXN,CKB,CLN5,AGT,HPX,TXNDC16,ALDOA,FN1,ANXA7,CP,APLP2,APP,CLSTN1,CARTPT,IL6ST,GAA,SOD1,ATP6V1A,DBI,QSOX1,TEX101,RAB7A,KIF5B,GNB1,CA2,CACNA2D1,CALM1,CALR,CAMP,LAMP2,LCN2,TMBIM6,TF,PDIA3,P4HB,CD38,EIF5A,LTF
GO: Biological Process	GO:0009199	ribonucleoside triphosphate metabolic process		0.0001387	0.001882	19	270	PARK7,PGAM1,PGK1,PGM1,FBP1,PKM,ALDOA,HSPA1A,HSPA8,VCP,ATP6V1A,GAPDH,NME2,PNP,GPI,LDHA,LDHC,ENO1,TPI1
GO: Biological Process	GO:0070727	cellular macromolecule localization		0.0001406	0.001901	70	1676	HSP90B1,RPLP1,CFL1,PARK7,PFN1,TXN,UBA52,PIGR,AGT,MLPH,HSPA5,HSPA8,SDCBP,VCL,VCP,HSP90AA1,HSP90AB1,EZR,ANXA2,AGR2,CCT2,CPE,VPS25,APOD,YWHAB,YWHAE,YWHAG,YWHAH,YWHAZ,ARF4,RUVBL1,CCT5,MYO6,RAB11A,GNPTG,TMBIM1,IQGAP1,PTN,RAB10,F11R,RAB7A,OS9,KIF5B,YWHAQ,RAB1A,RAB2A,RAB27A,NOV,SFN,PDCD6,CALR,NUCB1,LAMA5,LAMP1,LAMP2,CORO1B,LCP1,PDIA3,SIL1,GSN,CCT6A,MPP5,PRDX1,EIF5A,CD81,VPS28,SYTL1,CDC42,CDH1,AGRN
GO: Biological Process	GO:0010810	regulation of cell-substrate adhesion		0.000141	0.001901	15	184	FBLN2,VTN,FN1,AGR2,OLFM4,APOA1,ST6GAL1,APOD,SPOCK1,SMOC2,IQGAP1,PTN,CALR,THBS1,CDC42
GO: Biological Process	GO:0044236	multicellular organism metabolic process		0.0001411	0.001901	13	144	MFAP4,MMP2,PRDX5,SERPINF2,COL6A2,COL12A1,CST3,CTSB,CTSD,CTSL,ACE,TGFBR3,COL18A1
GO: Biological Process	GO:0031401	positive regulation of protein modification process		0.0001447	0.001946	55	1230	RPLP1,PARK7,TXN,UBA52,CLU,AGT,HPX,PLA2G2A,SERPINF2,HSPA2,HSPA5,SDCBP,VCP,HSP90AB1,VTN,ANG,GDF15,ANXA2,WNT7A,PPP1R7,CARTPT,IGFBP4,PRKAR2A,SMPD1,IL6ST,SOD1,PSAP,PSMA2,PSMA4,PSMA5,PSMA6,PSMB1,PSMB2,PSMB3,PSMC3,PSMC4,PSMD5,PSME1,ACE,IQGAP1,TEX101,C3,FAM129A,RAP1B,CALM1,CAMP,PRDX2,TF,LEFTY2,THBS1,TIMP2,CD81,LTF,CDC42,AGRN
GO: Biological Process	GO:0009144	purine nucleoside triphosphate metabolic process		0.0001455	0.00195	19	271	PARK7,PGAM1,PGK1,PGM1,FBP1,PKM,ALDOA,HSPA1A,HSPA8,VCP,ATP6V1A,GAPDH,NME2,PNP,GPI,LDHA,LDHC,ENO1,TPI1
GO: Biological Process	GO:0042278	purine nucleoside metabolic process		0.0001457	0.00195	23	364	PARK7,ACPP,PGAM1,PGK1,PGM1,FBP1,HPRT1,PKM,ALDOA,HSPA1A,HSPA8,VCP,APRT,NT5C2,ATP6V1A,GAPDH,NME2,PNP,GPI,LDHA,LDHC,ENO1,TPI1
GO: Biological Process	GO:0002003	angiotensin maturation		0.0001469	0.001953	4	11	AGT,MME,CTSZ,ACE
GO: Biological Process	GO:0010755	regulation of plasminogen activation		0.0001469	0.001953	4	11	SERPINF2,RUVBL1,THBS1,CLEC3B
GO: Biological Process	GO:0034975	protein folding in endoplasmic reticulum		0.0001469	0.001953	4	11	HSP90B1,HSPA5,CALR,PDIA3
GO: Biological Process	GO:0042742	defense response to bacterium		0.0001526	0.002024	19	272	REG3G,PGC,IGLL5,SPON2,PLA2G2A,SEMG1,SEMG2,ANG,ANXA3,APP,KLK3,SLPI,B2M,RAB1A,CAMP,MUC5B,LTF,LYZ,SPACA3
GO: Biological Process	GO:0090090	negative regulation of canonical Wnt signaling pathway		0.0001534	0.00203	14	165	UBA52,IGFBP4,PSMA2,PSMA4,PSMA5,PSMA6,PSMB1,PSMB2,PSMB3,PSMC3,PSMC4,PSMD5,PSME1,CDH1
GO: Biological Process	GO:0044706	multi-multicellular organism process		0.0001553	0.002051	18	250	HEXB,A2M,ACR,AGT,MMP2,SEMG1,IGFBP5,CTSB,SOD1,GC,B4GALT1,EDDM3A,TGM4,NAMPT,TIMP1,LNPEP,CD38,CDH1
GO: Biological Process	GO:0044243	multicellular organismal catabolic process		0.0001608	0.002117	9	74	MMP2,COL6A2,COL12A1,CST3,CTSB,CTSD,CTSL,ACE,COL18A1
GO: Biological Process	GO:0009119	ribonucleoside metabolic process		0.0001632	0.002139	24	391	PARK7,ACPP,PGAM1,PGK1,PGM1,FBP1,HPRT1,PKM,ALDOA,HSPA1A,HSPA8,VCP,APRT,NT5C2,ATP6V1A,CMPK1,GAPDH,NME2,PNP,GPI,LDHA,LDHC,ENO1,TPI1
GO: Biological Process	GO:0050673	epithelial cell proliferation		0.0001632	0.002139	24	391	RIDA,SERPINF1,CD109,REG3G,LRG1,ANG,WNT7A,APOA1,APOH,IGFBP4,IGFBP5,B4GALT1,PTN,NME2,NOV,SFN,PDCD6,LAMC1,NCSTN,ECM1,TGFBR3,THBS1,CDC42,CDH1
GO: Biological Process	GO:0022414	reproductive process		0.0001637	0.002139	64	1503	HEXA,HEXB,A2M,ACR,PARK7,SERPINF1,WFDC2,CLU,CRISP1,BASP1,BSPH1,AGT,MMP2,HSPA2,ALOX15B,HSP90AB1,SEMG1,SELENOP,ANG,ADAMTS1,ANXA1,WNT7A,APLP2,CCT2,IDH1,APP,P3H4,PPP2R1A,ARSA,IGF2R,RUVBL1,IGFBP5,PLPP1,CCT5,CTSB,SOD1,PSAP,SPINK2,SPINT1,ACRBP,GC,PTGDS,ACE,ELSPBP1,GGT1,B4GALT1,EDDM3A,PTN,CAPN5,CALR,LAMP1,TMBIM6,TGM4,CCT6A,NAMPT,CD9,TIMP1,ADGRG2,LNPEP,PEBP1,CD38,CDH1,SERPINA5,SPACA3
GO: Biological Process	GO:0001816	cytokine production		0.0001638	0.002139	36	700	PARK7,UBA52,CLU,SPON2,AGT,SERPINF2,HSPA1A,HSPB1,ALOX15B,EZR,FN1,ANXA1,ANXA4,APOA1,APOD,CHID1,IL6ST,SOD1,B2M,IQGAP1,F11R,C3,RAB1A,PNP,ITCH,CAMP,GSTP1,ORM1,THBS1,LIPA,CD14,PAEP,LPL,TSPAN6,IL1RL1,LTF
GO: Biological Process	GO:1901566	organonitrogen compound biosynthetic process		0.0001666	0.00217	62	1444	HEXA,RIDA,AARS,RPLP1,ACO1,ACR,ESD,PARK7,AKR1A1,B4GALT5,UBA52,HPRT1,UGDH,PKM,ALAD,ALDOA,PLOD1,HSPB1,CAP1,VCP,FMOD,ANG,WARS,FOLH1,APEH,APOA1,APP,APRT,KLK3,IGFBP5,PLPP1,CNDP2,SMPD1,SMS,DNAJC3,CMPK1,GAPDH,SPR,GARS,PHGDH,GGT1,B4GALT1,NME2,GOT1,PNP,PTCD3,GPC1,FAM129A,CALM1,CALR,SLC44A4,LDHC,GSS,GSTM3,GSTP1,THBS1,EEF1G,EEF2,NAMPT,TIMP2,EIF5A,AGRN
GO: Biological Process	GO:0000003	reproduction		0.0001699	0.002208	64	1505	HEXA,HEXB,A2M,ACR,PARK7,SERPINF1,WFDC2,CLU,CRISP1,BASP1,BSPH1,AGT,MMP2,HSPA2,ALOX15B,HSP90AB1,SEMG1,SELENOP,ANG,ADAMTS1,ANXA1,WNT7A,APLP2,CCT2,IDH1,APP,P3H4,PPP2R1A,ARSA,IGF2R,RUVBL1,IGFBP5,PLPP1,CCT5,CTSB,SOD1,PSAP,SPINK2,SPINT1,ACRBP,GC,PTGDS,ACE,ELSPBP1,GGT1,B4GALT1,EDDM3A,PTN,CAPN5,CALR,LAMP1,TMBIM6,TGM4,CCT6A,NAMPT,CD9,TIMP1,ADGRG2,LNPEP,PEBP1,CD38,CDH1,SERPINA5,SPACA3
GO: Biological Process	GO:0000904	cell morphogenesis involved in differentiation		0.0001786	0.002315	41	840	HEXA,CFL1,MATN2,ACTB,ACTN1,BASP1,SPON2,HPRT1,BAIAP2,SDCBP,VCL,EZR,SEMA3C,FMOD,FN1,WNT7A,OLFM4,APOA1,ST6GAL1,APP,YWHAH,RAB21,SOD1,SPR,RAB11A,RAB10,PTPRF,KIF5B,RAB1A,RAB3A,GPC1,PLOD3,CALR,LAMA5,LAMB2,LAMC1,TGFBR3,COL18A1,CDC42,CDH1,AGRN
GO: Biological Process	GO:1903772	regulation of viral budding via host ESCRT complex		0.0001859	0.002404	3	5	TSG101,MVB12A,VPS37B
GO: Biological Process	GO:0050801	ion homeostasis		0.0001862	0.002404	38	759	HEXB,EPHX2,HSP90B1,ACO1,CKB,LIPG,CLN5,AGT,HPX,ANPEP,ANXA7,CP,APLP2,APOA1,APP,CLSTN1,IL6ST,SOD1,ATP6V1A,B2M,DBI,STEAP2,TEX101,RAB7A,GNB1,GOT1,CA2,CA4,CACNA2D1,CALM1,CALR,STEAP4,LCN2,TMBIM6,TF,CD38,EIF5A,LTF
GO: Biological Process	GO:0009566	fertilization		0.0001896	0.002436	15	189	HEXB,ACR,PARK7,CRISP1,BSPH1,CCT2,ARSA,CCT5,SPINK2,ELSPBP1,B4GALT1,CCT6A,CD9,SERPINA5,SPACA3
GO: Biological Process	GO:0050792	regulation of viral process		0.0001896	0.002436	15	189	CFL1,TSG101,PFN1,MVB12A,APCS,VPS25,PPIA,PPIB,SLPI,RAB7A,VPS37B,GSN,P4HB,TMPRSS2,LTF
GO: Biological Process	GO:0043200	response to amino acid		0.0001906	0.002439	12	129	AARS,CFL1,ALAD,MMP2,PTN,GLRA2,TMBIM6,GSN,GSS,GSTP1,EEF2,CDH1
GO: Biological Process	GO:0003158	endothelium development		0.0001906	0.002439	12	129	AGT,EZR,WNT7A,PTN,F11R,PTPRS,RAB1A,RAP1B,PLOD3,LAMA5,GSTM3,COL18A1
GO: Biological Process	GO:0001667	ameboidal-type cell migration		0.0001926	0.002459	22	347	CFL1,SERPINF1,PFN1,AGT,HSPB1,CAP1,SEMA3C,ANXA3,WNT7A,APOA1,APOH,PRCP,CTSH,RAB11A,NOV,DPP4,PDCD6,LAMA5,CORO1B,TGFBR3,THBS1,TIMP1
GO: Biological Process	GO:1902108	regulation of mitochondrial membrane permeability involved in apoptotic process		0.0001943	0.002475	8	60	HSPA1A,YWHAB,YWHAE,YWHAG,YWHAH,YWHAZ,YWHAQ,SFN
GO: Biological Process	GO:0031639	plasminogen activation		0.0001967	0.0025	5	21	SERPINF2,APOH,RUVBL1,THBS1,CLEC3B
GO: Biological Process	GO:0045921	positive regulation of exocytosis		0.0001989	0.002522	10	93	TSG101,SDCBP,RAB3D,RAB7A,RAB3A,RAB27A,RAB27B,PDCD6IP,LAMP1,SYT7
GO: Biological Process	GO:0030968	endoplasmic reticulum unfolded protein response		0.000205	0.002594	12	130	AARS,HSP90B1,DNAJB9,TPP1,HSPA1A,HSPA5,VCP,HYOU1,AGR2,DNAJC3,CALR,TMBIM6
GO: Biological Process	GO:0017014	protein nitrosylation		0.0002157	0.002719	4	12	DDAH1,ADH5,GAPDH,ACE
GO: Biological Process	GO:1900121	negative regulation of receptor binding		0.0002157	0.002719	4	12	ANXA2,B2M,PTPRF,CRTAC1
GO: Biological Process	GO:0048524	positive regulation of viral process		0.0002173	0.002732	10	94	CFL1,TSG101,PFN1,MVB12A,PPIA,PPIB,RAB7A,VPS37B,P4HB,TMPRSS2
GO: Biological Process	GO:0003081	regulation of systemic arterial blood pressure by renin-angiotensin		0.0002196	0.002756	6	33	AGT,MME,SERPINF2,KLK3,CTSZ,ACE
GO: Biological Process	GO:0010631	epithelial cell migration		0.0002221	0.002781	17	235	SERPINF1,PFN1,AGT,HSPB1,ANXA3,WNT7A,APOA1,APOH,PRCP,CTSH,RAB11A,NOV,DPP4,PDCD6,CORO1B,TGFBR3,THBS1
GO: Biological Process	GO:0023014	signal transduction by protein phosphorylation		0.0002249	0.00281	45	962	TSG101,UBA52,AGT,PLA2G2A,SERPINF2,SDCBP,EZR,FN1,GDF15,WNT7A,APOA1,YWHAB,CARTPT,PPP2R1A,IGFBP4,SMPD1,CTSH,SOD1,PSAP,PSMA2,PSMA4,PSMA5,PSMA6,PSMB1,PSMB2,PSMB3,PSMC3,PSMC4,PSMD5,PSME1,IQGAP1,C3,RAP1B,ITCH,CALM1,PRDX2,TF,LEFTY2,GSTP1,THBS1,TIMP2,PEBP1,PRDX1,CD81,CDC42
GO: Biological Process	GO:0001817	regulation of cytokine production		0.0002259	0.002816	33	631	PARK7,UBA52,CLU,SPON2,AGT,SERPINF2,HSPA1A,HSPB1,ALOX15B,EZR,FN1,ANXA1,ANXA4,APOA1,APOD,CHID1,IL6ST,SOD1,B2M,IQGAP1,F11R,C3,ITCH,CAMP,GSTP1,ORM1,THBS1,CD14,PAEP,LPL,TSPAN6,IL1RL1,LTF
GO: Biological Process	GO:0034103	regulation of tissue remodeling		0.0002413	0.003001	9	78	AGT,CARTPT,CST3,TMBIM1,B4GALT1,CA2,SYT7,TF,CD38
GO: Biological Process	GO:0006665	sphingolipid metabolic process		0.0002418	0.003002	13	152	HEXA,HEXB,PPP2R1A,ARSA,PLPP1,ASAH1,SMPD1,PSAP,NEU1,GLA,GLB1,SMPDL3A,GM2A
GO: Biological Process	GO:0044093	positive regulation of molecular function		0.0002438	0.00302	76	1893	A2M,RPLP1,ACR,PARK7,PFN1,TXN,UBA52,PLAA,CLU,AGT,ARHGAP29,ALDH1A1,HSPA1A,HSPA2,HSPA5,HSPA8,CAP1,VCP,HSP90AB1,SEMG1,SEMG2,VTN,ANG,FN1,ANXA2,ANXA3,APOA1,CCT2,APOH,APP,KLK3,YWHAB,DIS3,ARF4,RHOC,CARTPT,PRKAR2A,CTSH,SOD1,PSAP,PSMA2,PSMA4,PSMA5,PSMA6,B2M,PSMB1,PSMB2,PSMB3,PSMC3,PSMC4,PSMD5,PSME1,ACE,GDI2,IQGAP1,F11R,GM2A,KIF5B,RAB3A,CACNA2D1,PDCD6,CALM1,DOCK9,ARHGEF12,NCSTN,PRDX2,TF,GSN,TGFBR3,THBS1,TIM…
GO: Biological Process	GO:0033993	response to lipid		0.0002453	0.003033	47	1023	RIDA,ACR,PARK7,SERPINF1,ADH5,SPON2,ALAD,MMP2,HSP90AA1,FN1,ADAMTS1,ANXA1,ANXA3,WNT7A,APOA1,IDH1,APOH,YWHAH,ARSA,IGF2R,PLPP1,SLPI,CTSH,PTGES3,B2M,GC,PTGDS,ACE,PTN,RAB7A,C3,GNB1,GOT1,CA2,CALM1,CALR,PRDX2,LDHA,PDIA3,GSTM3,GSTP1,TGFBR3,THBS1,EEF2,CD14,CD38,LTF
GO: Biological Process	GO:0061462	protein localization to lysosome		0.0002489	0.00307	5	22	HSPA8,GNPTG,RAB7A,LAMP2,CD81
GO: Biological Process	GO:0034620	cellular response to unfolded protein		0.0002537	0.003123	12	133	AARS,HSP90B1,DNAJB9,TPP1,HSPA1A,HSPA5,VCP,HYOU1,AGR2,DNAJC3,CALR,TMBIM6
GO: Biological Process	GO:0090132	epithelium migration		0.000258	0.003168	17	238	SERPINF1,PFN1,AGT,HSPB1,ANXA3,WNT7A,APOA1,APOH,PRCP,CTSH,RAB11A,NOV,DPP4,PDCD6,CORO1B,TGFBR3,THBS1
GO: Biological Process	GO:0006623	protein targeting to vacuole		0.0002607	0.003195	6	34	HSPA8,VPS25,GNPTG,RAB7A,LAMP2,VPS28
GO: Biological Process	GO:0051205	protein insertion into membrane		0.000277	0.003388	7	48	YWHAB,YWHAE,YWHAG,YWHAH,YWHAZ,YWHAQ,SFN
GO: Biological Process	GO:0002002	regulation of angiotensin levels in blood		0.000305	0.003699	4	13	AGT,MME,CTSZ,ACE
GO: Biological Process	GO:1903894	regulation of IRE1-mediated unfolded protein response		0.000305	0.003699	4	13	HSPA1A,HSPA5,AGR2,TMBIM6
GO: Biological Process	GO:0097067	cellular response to thyroid hormone stimulus		0.000305	0.003699	4	13	CTSB,CTSH,CTSL,LMO2
GO: Biological Process	GO:0006012	galactose metabolic process		0.000305	0.003699	4	13	PGM1,GALM,B4GALT1,GLB1
GO: Biological Process	GO:0072666	establishment of protein localization to vacuole		0.0003076	0.003723	6	35	HSPA8,VPS25,GNPTG,RAB7A,LAMP2,VPS28
GO: Biological Process	GO:0010876	lipid localization		0.0003094	0.003737	22	359	HEXA,HEXB,ACAT2,CLU,LIPG,AGT,ALB,ANXA1,APOA1,NPC2,APOD,APOH,PSAP,STARD10,ACE,GM2A,C3,LCN1,SYT7,THBS1,LPL,SERPINA5
GO: Biological Process	GO:0046034	ATP metabolic process		0.0003135	0.003779	17	242	PARK7,PGAM1,PGK1,PGM1,FBP1,PKM,ALDOA,HSPA1A,HSPA8,VCP,ATP6V1A,GAPDH,GPI,LDHA,LDHC,ENO1,TPI1
GO: Biological Process	GO:0006879	cellular iron ion homeostasis		0.0003157	0.003798	7	49	ACO1,HPX,CP,SOD1,LCN2,TF,LTF
GO: Biological Process	GO:0071363	cellular response to growth factor stimulus		0.0003169	0.003804	33	643	CD109,PFN1,LRG1,UBA52,CLU,AGT,HSPA5,SDCBP,HSPB1,VTN,FMOD,FN1,GDF15,WNT7A,APOA1,APP,SPINT1,IQGAP1,PTN,PTPRF,F11R,GLG1,TWSG1,GPC1,PDCD6,CORO1B,LEFTY2,GSTP1,TGFBR3,THBS1,EEF2,FSTL1,CLEC3B
GO: Biological Process	GO:2001233	regulation of apoptotic signaling pathway		0.0003176	0.003805	24	409	PARK7,CLU,AGT,HSPA1A,HSPB1,HYOU1,YWHAB,YWHAE,YWHAG,YWHAH,YWHAZ,PPP2R1A,CTSH,SOD1,TMBIM1,YWHAQ,SFN,PRDX2,TMBIM6,PDIA3,GSN,GSTP1,THBS1,P4HB
GO: Biological Process	GO:0042325	regulation of phosphorylation		0.0003212	0.003835	63	1510	RPLP1,PARK7,CD109,TSG101,PGAM1,TXN,UBA52,FBP1,CLU,AGT,HPX,PLA2G2A,SERPINF2,HSPA2,HSPA5,SDCBP,HSPB1,VCP,HSP90AB1,EZR,VTN,ANG,FN1,GDF15,ANXA2,WNT7A,APLP2,APOA1,APP,KLK3,YWHAG,ZFYVE28,CARTPT,PPP2R1A,IGFBP4,PRKAR2A,SMPD1,DNAJC3,IL6ST,SOD1,PSAP,ACE,IQGAP1,TEX101,C3,SFN,FAM129A,RAP1B,ITCH,CALM1,CAMP,PRDX2,TF,LEFTY2,GSTP1,THBS1,TIMP2,PEBP1,PRDX1,CD81,LTF,CDC42,AGRN
GO: Biological Process	GO:0034637	cellular carbohydrate biosynthetic process		0.0003215	0.003835	9	81	PGM1,UBA52,UGP2,PPP1CB,PTGES3,IMPA1,B4GALT1,GOT1,NANS
GO: Biological Process	GO:0098771	inorganic ion homeostasis		0.0003236	0.003853	35	698	HEXB,EPHX2,HSP90B1,ACO1,CKB,CLN5,AGT,HPX,ANPEP,ANXA7,CP,APLP2,APP,CLSTN1,IL6ST,SOD1,ATP6V1A,B2M,DBI,STEAP2,TEX101,RAB7A,GNB1,CA2,CA4,CACNA2D1,CALM1,CALR,STEAP4,LCN2,TMBIM6,TF,CD38,EIF5A,LTF
GO: Biological Process	GO:0070848	response to growth factor		0.0003254	0.003866	34	671	CD109,PFN1,LRG1,UBA52,CLU,AGT,HSPA5,SDCBP,HSPB1,VTN,FMOD,FN1,GDF15,ANXA3,WNT7A,APOA1,APP,SPINT1,IQGAP1,PTN,PTPRF,F11R,GLG1,TWSG1,GPC1,PDCD6,CORO1B,LEFTY2,GSTP1,TGFBR3,THBS1,EEF2,FSTL1,CLEC3B
GO: Biological Process	GO:0019220	regulation of phosphate metabolic process		0.0003263	0.00387	71	1756	HSP90B1,RPLP1,ACR,PARK7,CD109,TSG101,PGAM1,TXN,UBA52,FBP1,CLU,AGT,HPX,PLA2G2A,SERPINF2,HSPA2,HSPA5,SDCBP,HSPB1,CAP1,VCP,HSP90AB1,EZR,VTN,ANG,FN1,GDF15,ANXA2,WNT7A,APLP2,APOA1,IDH1,APP,KLK3,YWHAB,YWHAE,YWHAG,ZFYVE28,PPP1R7,CARTPT,PPP2R1A,IGFBP4,PRKAR2A,SMPD1,DNAJC3,IL6ST,SOD1,PSAP,ACE,IQGAP1,TEX101,C3,NME2,SFN,FAM129A,RAP1B,ITCH,CALM1,CAMP,PRDX2,TF,LEFTY2,GSTP1,THBS1,TIMP2,PEBP1,PRDX1,CD81,LTF,CDC…
GO: Biological Process	GO:1901137	carbohydrate derivative biosynthetic process		0.000327	0.00387	38	781	HEXA,MAN2A1,ACR,AKR1A1,B4GALT5,SERPINA1,HPRT1,UGDH,UGP2,PKM,ALDOA,ITM2B,CAP1,VCP,FMOD,ST6GAL1,APRT,ARF4,FUT5,MUC6,SORD,CMPK1,UAP1,CCDC126,GNPTG,B4GALT1,CANT1,NME2,PNP,GPC1,CALM1,MUC5B,LDHC,THBS1,TIMP2,NANS,AGRN,TPI1
GO: Biological Process	GO:1904951	positive regulation of establishment of protein localization		0.0003357	0.003965	30	565	TSG101,AGT,ALOX15B,HSP90AA1,HSP90AB1,EZR,ANG,AGR2,CCT2,PPIA,YWHAB,YWHAE,YWHAG,YWHAH,YWHAZ,RUVBL1,CCT5,KIF5B,YWHAQ,SFN,CAMP,CCT6A,CD14,PAEP,LPL,CD38,IL1RL1,VPS28,CDC42,CDH1
GO: Biological Process	GO:0042127	regulation of cell proliferation		0.0003399	0.004001	68	1666	RIDA,SERPINF1,CD109,REG3G,TSG101,ADAM10,LRG1,S100A11,EFEMP1,CLU,AGT,SERPINF2,SDCBP,ALOX15B,ANG,WARS,FN1,ADAMTS1,ANXA1,ANXA2,WNT7A,ST6GAL1,APOD,APOH,IGFBP5,PLPP1,CST3,CTSH,IL6ST,SPINT1,AZGP1,NAP1L1,PTGDS,ACE,B4GALT1,PTN,NEU1,PTPRF,NME2,NOV,SFN,PNP,DPP4,ITCH,PDCD6,CALR,CAMP,LAMA5,LAMC1,ECM1,TF,GSTP1,TGFBR3,LIFR,COL18A1,THBS1,NAMPT,CD9,TIMP1,TIMP2,CD38,EIF5A,CD59,CD81,IL1RL1,LTF,CDC42,CDH1
GO: Biological Process	GO:0031667	response to nutrient levels		0.0003405	0.004001	31	592	AOC1,PARK7,LIPG,PKM,ALAD,ALB,HSPA5,HSPA8,ADAMTS1,CP,APOA1,CARTPT,ARSA,RUVBL1,SOD1,SORD,ATP6V1A,GAPDH,GC,PTN,QSOX1,RAB7A,DSC2,LDHA,PDIA3,GSN,GSS,GSTP1,EEF2,RNASE4,FSTL1
GO: Biological Process	GO:0050885	neuromuscular process controlling balance		0.0003408	0.004001	8	65	HEXA,HEXB,AARS,TPP1,APLP2,APP,GAA,GM2A
GO: Biological Process	GO:0019693	ribose phosphate metabolic process		0.0003458	0.004051	30	566	ACR,PARK7,PGAM1,PGD,PGK1,PGM1,FBP1,HPRT1,PKM,PGLS,ALDOA,HSPA1A,HSPA8,CAP1,VCP,APRT,NT5C2,ATP6V1A,CMPK1,GAPDH,NME2,PNP,GPI,CALM1,LDHA,LDHC,THBS1,TIMP2,ENO1,TPI1
GO: Biological Process	GO:0031175	neuron projection development		0.0003494	0.004085	44	953	CFL1,MATN2,SERPINF1,ACTB,EFEMP1,CLU,UBE2V2,SPON2,HPRT1,MMP2,BAIAP2,VCL,EZR,SEMA3C,FMOD,FN1,ADAMTS1,WNT7A,APOA1,APOD,APP,YWHAH,ARF4,RAB21,MYO6,SPOCK1,B2M,RAB11A,PHGDH,IQGAP1,PTN,RAB10,NEU1,PTPRF,KIF5B,NME2,RAB3A,GPC1,LAMB2,LAMC1,CRTAC1,LIFR,CDH1,AGRN
GO: Biological Process	GO:0044275	cellular carbohydrate catabolic process		0.0003527	0.004111	9	82	PGAM1,PGM1,FBP1,PPP1CB,GAA,SORD,PYGB,CALM1,TPI1
GO: Biological Process	GO:0030177	positive regulation of Wnt signaling pathway		0.000353	0.004111	13	158	UBA52,WNT7A,PSMA2,PSMA4,PSMA5,PSMA6,PSMB1,PSMB2,PSMB3,PSMC3,PSMC4,PSMD5,PSME1
GO: Biological Process	GO:0042743	hydrogen peroxide metabolic process		0.0003587	0.004169	7	50	PARK7,PRDX5,PRDX6,SOD1,GPX3,PRDX2,PRDX1
GO: Biological Process	GO:1903551	regulation of extracellular exosome assembly		0.0003643	0.004217	3	6	TSG101,SDCBP,PDCD6IP
GO: Biological Process	GO:0010815	bradykinin catabolic process		0.0003643	0.004217	3	6	XPNPEP1,CTSH,ACE
GO: Biological Process	GO:0009116	nucleoside metabolic process		0.0003658	0.004225	24	413	PARK7,ACPP,PGAM1,PGK1,PGM1,FBP1,HPRT1,PKM,ALDOA,HSPA1A,HSPA8,VCP,APRT,NT5C2,ATP6V1A,CMPK1,GAPDH,NME2,PNP,GPI,LDHA,LDHC,ENO1,TPI1
GO: Biological Process	GO:0009896	positive regulation of catabolic process		0.0003788	0.004365	24	414	PARK7,UBA52,CLU,UBE2V2,VCP,EZR,APOA1,APOH,PSMA2,PSMA4,PSMA5,PSMA6,PSMB1,PSMB2,PSMB3,PSMC3,PSMC4,PSMD5,PSME1,RAB7A,ITCH,USP5,CD81,VPS28
GO: Biological Process	GO:0051223	regulation of protein transport		0.0003797	0.004365	39	815	PARK7,TSG101,FAM3D,TXN,AGT,HSPA8,ALOX15B,HSP90AA1,HSP90AB1,EZR,ANG,FN1,ANXA1,ANXA4,ANXA5,APOA1,APOD,PPIA,CARTPT,RUVBL1,RAB11A,OS9,KIF5B,NOV,SFN,CAMP,NUCB1,LCP1,TMBIM6,SYT7,CD14,PAEP,LPL,CD38,PRDX1,IL1RL1,VPS28,CDC42,CDH1
GO: Biological Process	GO:0051235	maintenance of location		0.0003801	0.004365	20	316	HEXA,HEXB,HSP90B1,PFN1,ALB,HSPA5,EZR,APOA1,YWHAB,GAA,DBI,TEX101,GM2A,OS9,C3,CALM1,CALR,PDIA3,GSN,LPL
GO: Biological Process	GO:0019682	glyceraldehyde-3-phosphate metabolic process		0.0003843	0.00437	5	24	PGAM1,PGD,PGLS,ALDH1A1,TPI1
GO: Biological Process	GO:0034367	protein-containing complex remodeling		0.0003843	0.00437	5	24	LIPG,AGT,PLA2G2A,APOA1,LPL
GO: Biological Process	GO:0034368	protein-lipid complex remodeling		0.0003843	0.00437	5	24	LIPG,AGT,PLA2G2A,APOA1,LPL
GO: Biological Process	GO:0034369	plasma lipoprotein particle remodeling		0.0003843	0.00437	5	24	LIPG,AGT,PLA2G2A,APOA1,LPL
GO: Biological Process	GO:0019430	removal of superoxide radicals		0.0003843	0.00437	5	24	PARK7,SOD1,SOD3,PRDX2,PRDX1
GO: Biological Process	GO:0051174	regulation of phosphorus metabolic process		0.0004029	0.004565	71	1769	HSP90B1,RPLP1,ACR,PARK7,CD109,TSG101,PGAM1,TXN,UBA52,FBP1,CLU,AGT,HPX,PLA2G2A,SERPINF2,HSPA2,HSPA5,SDCBP,HSPB1,CAP1,VCP,HSP90AB1,EZR,VTN,ANG,FN1,GDF15,ANXA2,WNT7A,APLP2,APOA1,IDH1,APP,KLK3,YWHAB,YWHAE,YWHAG,ZFYVE28,PPP1R7,CARTPT,PPP2R1A,IGFBP4,PRKAR2A,SMPD1,DNAJC3,IL6ST,SOD1,PSAP,ACE,IQGAP1,TEX101,C3,NME2,SFN,FAM129A,RAP1B,ITCH,CALM1,CAMP,PRDX2,TF,LEFTY2,GSTP1,THBS1,TIMP2,PEBP1,PRDX1,CD81,LTF,CDC…
GO: Biological Process	GO:0002768	immune response-regulating cell surface receptor signaling pathway		0.000403	0.004565	22	366	ACTB,IGLL5,UBA52,PIGR,BAIAP2,HSP90AA1,HSP90AB1,EZR,PSMA2,PSMA4,PSMA5,PSMA6,PSMB1,PSMB2,PSMB3,PSMC3,PSMC4,PSMD5,PSME1,CALM1,CD38,CDC42
GO: Biological Process	GO:0097286	iron ion import		0.000418	0.004705	4	14	B2M,STEAP2,STEAP4,TF
GO: Biological Process	GO:0060177	regulation of angiotensin metabolic process		0.000418	0.004705	4	14	AGT,MME,CTSZ,ACE
GO: Biological Process	GO:0001932	regulation of protein phosphorylation		0.00042	0.004705	59	1404	RPLP1,PARK7,CD109,TSG101,TXN,UBA52,CLU,AGT,HPX,PLA2G2A,SERPINF2,HSPA2,HSPA5,SDCBP,HSPB1,HSP90AB1,EZR,VTN,ANG,FN1,GDF15,ANXA2,WNT7A,APLP2,APOA1,APP,YWHAG,ZFYVE28,CARTPT,PPP2R1A,IGFBP4,PRKAR2A,SMPD1,DNAJC3,IL6ST,SOD1,PSAP,ACE,IQGAP1,TEX101,C3,SFN,FAM129A,RAP1B,ITCH,CALM1,CAMP,PRDX2,TF,LEFTY2,GSTP1,THBS1,TIMP2,PEBP1,PRDX1,CD81,LTF,CDC42,AGRN
GO: Biological Process	GO:0009988	cell-cell recognition		0.0004203	0.004705	8	67	ACR,CRISP1,CCT2,ARSA,CCT5,B4GALT1,CCT6A,SPACA3
GO: Biological Process	GO:0030574	collagen catabolic process		0.0004203	0.004705	8	67	MMP2,COL6A2,COL12A1,CST3,CTSB,CTSD,CTSL,COL18A1
GO: Biological Process	GO:0036498	IRE1-mediated unfolded protein response		0.0004203	0.004705	8	67	DNAJB9,TPP1,HSPA1A,HSPA5,HYOU1,AGR2,DNAJC3,TMBIM6
GO: Biological Process	GO:0006900	vesicle budding from membrane		0.0004261	0.004752	11	121	TSG101,SERPINA1,MVB12A,ANXA2,CTSZ,RAB1A,VPS37C,PDCD6IP,VPS37B,CD59,VPS28
GO: Biological Process	GO:1903509	liposaccharide metabolic process		0.0004261	0.004752	11	121	HEXA,HEXB,ARSA,ASAH1,SMPD1,PSAP,NEU1,GLA,GLB1,GM2A,NANS
GO: Biological Process	GO:0035967	cellular response to topologically incorrect protein		0.0004344	0.004836	12	141	AARS,HSP90B1,DNAJB9,TPP1,HSPA1A,HSPA5,VCP,HYOU1,AGR2,DNAJC3,CALR,TMBIM6
GO: Biological Process	GO:0055080	cation homeostasis		0.0004359	0.004842	34	682	HEXB,EPHX2,HSP90B1,ACO1,CLN5,AGT,HPX,ANPEP,ANXA7,CP,APLP2,APP,CLSTN1,IL6ST,SOD1,ATP6V1A,B2M,DBI,STEAP2,TEX101,RAB7A,GNB1,CA2,CA4,CACNA2D1,CALM1,CALR,STEAP4,LCN2,TMBIM6,TF,CD38,EIF5A,LTF
GO: Biological Process	GO:0043161	proteasome-mediated ubiquitin-dependent protein catabolic process		0.0004366	0.004842	23	393	HSP90B1,PARK7,DNAJB9,UBA52,CLU,UBE2V2,HSPA5,SDCBP,VCP,HSP90AB1,PSMA2,PSMA4,PSMA5,PSMA6,PSMB1,PSMB2,PSMB3,PSMC3,PSMC4,PSMD5,PSME1,OS9,USP5
GO: Biological Process	GO:0048699	generation of neurons		0.0004393	0.004863	63	1528	HEXA,MAN2A1,CFL1,MATN2,SERPINF1,ACTB,EFEMP1,CLU,UBE2V2,SPON2,CLN5,HPRT1,MMP2,BAIAP2,PLS3,VCL,HSP90AA1,EZR,SEMA3C,FMOD,FN1,ADAMTS1,WNT7A,APOA1,APOD,APP,PPIA,YWHAE,YWHAG,YWHAH,ARF4,RAB21,IL6ST,SOD1,SPINT1,MYO6,SPOCK1,SPR,B2M,NAGLU,RAB11A,ACE,PHGDH,IQGAP1,PTN,RAB10,NEU1,PTPRF,KIF5B,NME2,RAB3A,GPC1,CALR,LAMB2,LAMC1,CRTAC1,TF,LIFR,TIMP2,PROX2,CDC42,CDH1,AGRN
GO: Biological Process	GO:0002252	immune effector process		0.0004568	0.005043	40	851	A2M,ACTB,MDH1,PGC,IGLL5,UBA52,CLU,SPON2,HPX,BAIAP2,HSPA8,HSP90AA1,HSP90AB1,VTN,ANXA1,ANXA3,ANXA5,APOA1,CFI,YWHAZ,CTSH,DNAJC3,B2M,ACE,CFB,SERPING1,C3,C4A,RAB27A,PNP,DPP4,ITCH,LAMP1,PRDX2,LCP1,TMBIM6,PRDX1,TSPAN6,CD59,CDC42
GO: Biological Process	GO:0007006	mitochondrial membrane organization		0.0004574	0.005043	10	103	HEBP2,HSPA1A,HSP90AA1,YWHAB,YWHAE,YWHAG,YWHAH,YWHAZ,YWHAQ,SFN
GO: Biological Process	GO:0040014	regulation of multicellular organism growth		0.0004615	0.00508	9	85	AGT,EZR,ATRN,APP,PPIB,SOD1,LGMN,SPR,AZGP1
GO: Biological Process	GO:0050435	amyloid-beta metabolic process		0.0004699	0.005152	5	25	CLU,MME,APEH,ACE,NCSTN
GO: Biological Process	GO:0042744	hydrogen peroxide catabolic process		0.0004699	0.005152	5	25	PRDX5,PRDX6,GPX3,PRDX2,PRDX1
GO: Biological Process	GO:0048545	response to steroid hormone		0.0004755	0.005204	30	577	ACR,PARK7,SERPINF1,ALAD,MMP2,HSP90AA1,FN1,ANXA1,ANXA3,WNT7A,APOA1,IDH1,YWHAH,ARSA,PLPP1,PTGES3,GC,PTGDS,PTN,C3,GOT1,CA2,CALM1,CALR,LDHA,GSTM3,GSTP1,THBS1,EEF2,CD38
GO: Biological Process	GO:1903322	positive regulation of protein modification by small protein conjugation or removal		0.000478	0.005221	15	206	UBA52,CLU,HSPA5,VCP,PSMA2,PSMA4,PSMA5,PSMA6,PSMB1,PSMB2,PSMB3,PSMC3,PSMC4,PSMD5,PSME1
GO: Biological Process	GO:0034097	response to cytokine		0.0004813	0.005248	39	825	ADAM10,UBA52,SERPINA1,FASN,HPX,ALAD,MME,HSPA1A,HSPA5,HSP90AB1,FN1,ANXA1,APOA1,CTSB,IL6ST,GAPDH,PSMA2,PSMA4,PSMA5,PSMA6,B2M,PSMB1,PSMB2,PSMB3,PSMC3,PSMC4,PSMD5,PSME1,PTPRF,TXNDC17,ECM1,GSS,GSTP1,LIFR,CD14,TIMP1,TIMP2,CD38,IL1RL1
GO: Biological Process	GO:0048666	neuron development		0.000489	0.005314	49	1114	HEXA,CFL1,MATN2,SERPINF1,ACTB,EFEMP1,CLU,UBE2V2,SPON2,CLN5,HPRT1,MMP2,BAIAP2,VCL,EZR,SEMA3C,FMOD,FN1,ADAMTS1,WNT7A,APOA1,APOD,APP,YWHAH,ARF4,RAB21,SOD1,MYO6,SPOCK1,SPR,B2M,NAGLU,RAB11A,PHGDH,IQGAP1,PTN,RAB10,NEU1,PTPRF,KIF5B,NME2,RAB3A,GPC1,LAMB2,LAMC1,CRTAC1,LIFR,CDH1,AGRN
GO: Biological Process	GO:0010256	endomembrane system organization		0.0004892	0.005314	30	578	TSG101,MVB12A,CLU,BAIAP2,EZR,ANXA2,AGR2,VPS25,YWHAZ,PPP2R1A,SOD1,RAB11A,TMBIM1,RAB10,F11R,KIF5B,RAB1A,RAB2A,RAB27A,DOPEY2,VPS37C,PDCD6IP,LAMA5,VPS37B,SYT7,MPP5,VPS28,CDC42,CDH1,AGRN
GO: Biological Process	GO:1903409	reactive oxygen species biosynthetic process		0.0004941	0.005357	10	104	DDAH1,PARK7,CLU,AGT,HSP90AA1,HSP90AB1,SOD1,SPR,GLA,RAB27A
GO: Biological Process	GO:0034446	substrate adhesion-dependent cell spreading		0.0005035	0.005448	9	86	FN1,OLFM4,APOA1,ST6GAL1,RAB1A,CALR,LAMA5,LAMC1,CDC42
GO: Biological Process	GO:0043542	endothelial cell migration		0.0005051	0.005456	13	164	SERPINF1,AGT,HSPB1,ANXA3,WNT7A,APOA1,APOH,PRCP,NOV,DPP4,PDCD6,CORO1B,THBS1
GO: Biological Process	GO:0090303	positive regulation of wound healing		0.0005165	0.005569	7	53	REG3G,SERPINF2,VTN,ANXA1,APOH,PRDX2,THBS1
GO: Biological Process	GO:0071560	cellular response to transforming growth factor beta stimulus		0.0005191	0.005586	16	230	CD109,LRG1,UBA52,HSPA5,SDCBP,FMOD,FN1,GDF15,WNT7A,APOA1,F11R,GLG1,LEFTY2,TGFBR3,THBS1,CLEC3B
GO: Biological Process	GO:0007417	central nervous system development		0.0005401	0.005801	45	1002	RIDA,AARS,ACTB,CKB,CLU,BASP1,TPP1,CLN5,HPRT1,AGT,HSPA5,ATRN,SELENOP,VTN,ANG,ANXA3,WNT7A,APLP2,APOD,APP,YWHAE,YWHAH,ARF4,ARSA,IL6ST,SPOCK1,NAGLU,DBI,PHGDH,PTN,PTPRS,BTD,GLRA2,TWSG1,YWHAQ,CALM1,LAMB2,CRTAC1,LDHA,GSN,GSTP1,CD9,TIMP2,CDC42,CDH1
GO: Biological Process	GO:1904872	regulation of telomerase RNA localization to Cajal body		0.0005579	0.005938	4	15	CCT2,RUVBL1,CCT5,CCT6A
GO: Biological Process	GO:1904874	positive regulation of telomerase RNA localization to Cajal body		0.0005579	0.005938	4	15	CCT2,RUVBL1,CCT5,CCT6A
GO: Biological Process	GO:0010744	positive regulation of macrophage derived foam cell differentiation		0.0005579	0.005938	4	15	AGT,PLA2G2A,ALOX15B,LPL
GO: Biological Process	GO:1903543	positive regulation of exosomal secretion		0.0005579	0.005938	4	15	TSG101,SDCBP,RAB7A,PDCD6IP
GO: Biological Process	GO:0051131	chaperone-mediated protein complex assembly		0.0005579	0.005938	4	15	CLU,HSP90AA1,APCS,CCT2
GO: Biological Process	GO:0045595	regulation of cell differentiation		0.0005824	0.006188	68	1699	MAN2A1,CFL1,SERPINF1,CD109,REG3G,EFEMP1,CLU,UBE2V2,CLIC1,UCHL3,AGT,PLA2G2A,BAIAP2,SERPINF2,SDCBP,ALOX15B,HSP90AA1,SEMA3C,FMOD,FN1,ADAMTS1,ANXA1,GDF15,WNT7A,OLFM4,APCS,APOA1,ST6GAL1,APP,YWHAG,YWHAH,CARTPT,PPP2R1A,IGFBP5,RAB21,IL6ST,SOD1,SPINT1,SPOCK1,B2M,RAB11A,ACE,IQGAP1,B4GALT1,PTN,NEU1,PTPRF,GLG1,TWSG1,ADIRF,NME2,CA2,NOV,SFN,PNP,GPC1,CALR,PRDX2,TF,TGFBR3,TIMP2,LMO2,LPL,EIF5A,LTF,CDC42,CDH1,AGRN
GO: Biological Process	GO:1903036	positive regulation of response to wounding		0.0005848	0.006201	14	188	REG3G,AGT,PLA2G2A,SERPINF2,VTN,ANXA1,APOH,IL6ST,ACE,C3,PRDX2,THBS1,LPL,IL1RL1
GO: Biological Process	GO:0016042	lipid catabolic process		0.0005909	0.006255	19	303	HEXA,HEXB,PLA1A,LIPG,PLA2G2A,APOA1,IDH1,APOH,YWHAH,PRDX6,SMPD1,DBI,NEU1,GLA,SMPDL3A,RAB7A,GM2A,LIPA,LPL
GO: Biological Process	GO:0046916	cellular transition metal ion homeostasis		0.0005966	0.006292	9	88	ACO1,HPX,CP,APLP2,APP,SOD1,LCN2,TF,LTF
GO: Biological Process	GO:0031331	positive regulation of cellular catabolic process		0.0005972	0.006292	21	352	PARK7,UBA52,CLU,UBE2V2,VCP,EZR,APOA1,APOH,PSMA2,PSMA4,PSMA5,PSMA6,PSMB1,PSMB2,PSMB3,PSMC3,PSMC4,PSMD5,PSME1,USP5,CD81
GO: Biological Process	GO:0071559	response to transforming growth factor beta		0.0005977	0.006292	16	233	CD109,LRG1,UBA52,HSPA5,SDCBP,FMOD,FN1,GDF15,WNT7A,APOA1,F11R,GLG1,LEFTY2,TGFBR3,THBS1,CLEC3B
GO: Biological Process	GO:0090150	establishment of protein localization to membrane		0.0006003	0.006308	22	377	RPLP1,UBA52,SDCBP,HSP90AA1,EZR,ANXA2,AGR2,YWHAB,YWHAE,YWHAG,YWHAH,YWHAZ,RAB11A,TMBIM1,RAB10,F11R,KIF5B,YWHAQ,SFN,LAMA5,MPP5,CDH1
GO: Biological Process	GO:0031398	positive regulation of protein ubiquitination		0.0006164	0.006466	14	189	UBA52,CLU,HSPA5,PSMA2,PSMA4,PSMA5,PSMA6,PSMB1,PSMB2,PSMB3,PSMC3,PSMC4,PSMD5,PSME1
GO: Biological Process	GO:0044264	cellular polysaccharide metabolic process		0.0006193	0.006473	10	107	PGM1,UBA52,UGP2,PPP1CB,PTGES3,IL6ST,GAA,PYGB,CALM1,NANS
GO: Biological Process	GO:0051348	negative regulation of transferase activity		0.0006218	0.006473	22	378	PARK7,UBA52,HSPB1,YWHAG,ZFYVE28,PPP2R1A,PRKAR2A,SMPD1,DNAJC3,PSMA2,PSMA4,PSMA5,PSMA6,PSMB1,PSMB2,PSMB3,PSMC3,PSMC4,PSMD5,PSME1,SFN,GSTP1
GO: Biological Process	GO:0009438	methylglyoxal metabolic process		0.0006248	0.006473	3	7	PARK7,GLO1,GPI
GO: Biological Process	GO:0007341	penetration of zona pellucida		0.0006248	0.006473	3	7	HEXB,ACR,B4GALT1
GO: Biological Process	GO:0071971	extracellular exosome assembly		0.0006248	0.006473	3	7	TSG101,SDCBP,PDCD6IP
GO: Biological Process	GO:1903054	negative regulation of extracellular matrix organization		0.0006248	0.006473	3	7	HSPA8,CST3,DPP4
GO: Biological Process	GO:0090085	regulation of protein deubiquitination		0.0006248	0.006473	3	7	PARK7,VCP,ITCH
GO: Biological Process	GO:0043627	response to estrogen		0.0006261	0.006474	16	234	MMP2,HSP90AA1,ANXA1,WNT7A,APOA1,ARSA,GC,PTN,C3,CA2,CALR,LDHA,GSTM3,GSTP1,EEF2,CD38
GO: Biological Process	GO:0080135	regulation of cellular response to stress		0.0006292	0.006495	36	752	PARK7,TXN,CLU,UBE2V2,SERPINF2,HSPA1A,HSPA5,HSPA8,SDCBP,HSPB1,HSP90AA1,HSP90AB1,EZR,HYOU1,WNT7A,AGR2,YWHAE,RUVBL1,PTGES3,DNAJC3,SOD1,ATP6V1A,PSAP,GAPDH,QSOX1,PTPRF,RAB7A,OS9,PNP,ITCH,TMBIM6,TF,GSTP1,P4HB,PRDX1,CDC42
GO: Biological Process	GO:0014812	muscle cell migration		0.0006483	0.006644	9	89	AGT,VTN,ANXA1,IGFBP5,IL6ST,ACE,IQGAP1,NOV,CORO1B
GO: Biological Process	GO:0021782	glial cell development		0.0006483	0.006644	9	89	CLU,AGT,SOD1,PHGDH,LAMB2,GSN,GSTP1,MPP5,CD9
GO: Biological Process	GO:0005977	glycogen metabolic process		0.0006483	0.006644	9	89	PGM1,UBA52,UGP2,PPP1CB,PTGES3,IL6ST,GAA,PYGB,CALM1
GO: Biological Process	GO:1903573	negative regulation of response to endoplasmic reticulum stress		0.0006492	0.006644	6	40	PARK7,HSPA1A,HYOU1,DNAJC3,OS9,TMBIM6
GO: Biological Process	GO:0003044	regulation of systemic arterial blood pressure mediated by a chemical signal		0.0006493	0.006644	7	55	AGT,MME,SERPINF2,KLK3,SLC2A5,CTSZ,ACE
GO: Biological Process	GO:0016049	cell growth		0.000663	0.006772	29	562	TSG101,ADAM10,FBP1,AGT,SDCBP,VCL,SEMA3C,FMOD,FN1,APP,CLSTN1,PPP2R1A,IGFBP4,IGFBP5,RAB21,SPOCK1,RAB11A,IQGAP1,NOV,SFN,ITCH,LAMB2,SLC44A4,LEFTY2,TGFBR3,CD38,CD81,CDC42,ENO1
GO: Biological Process	GO:0045471	response to ethanol		0.0006718	0.00685	12	148	ALAD,ALDH1A1,ST6GAL1,ARSA,CTSB,SOD1,GGH,GLRA2,GSN,GSTP1,EEF2,CD14
GO: Biological Process	GO:0071451	cellular response to superoxide		0.000683	0.006907	5	27	PARK7,SOD1,SOD3,PRDX2,PRDX1
GO: Biological Process	GO:0071450	cellular response to oxygen radical		0.000683	0.006907	5	27	PARK7,SOD1,SOD3,PRDX2,PRDX1
GO: Biological Process	GO:0042730	fibrinolysis		0.000683	0.006907	5	27	SERPINF2,ANXA2,APOH,SERPING1,THBS1
GO: Biological Process	GO:0032400	melanosome localization		0.000683	0.006907	5	27	MLPH,RAB11A,RAB1A,RAB27A,RAB27B
GO: Biological Process	GO:0009100	glycoprotein metabolic process		0.0006834	0.006907	23	406	HEXA,HEXB,MAN2A1,MANBA,B4GALT5,SERPINA1,ITM2B,VCP,APCS,ST6GAL1,ARF4,CST3,FUT5,MUC6,CCDC126,GNPTG,B4GALT1,CANT1,SPOCK3,RAB1A,GPC1,MUC5B,THBS1
GO: Biological Process	GO:0048589	developmental growth		0.0007012	0.007062	33	673	CPQ,BASP1,AGT,PKM,VCL,EZR,ATRN,SEMA3C,FMOD,FN1,ANXA1,WNT7A,AGR2,APOD,APP,PPIB,IGFBP5,RAB21,SOD1,LGMN,PSAP,SPR,AZGP1,RAB11A,IQGAP1,C3,NOV,LAMB2,GSN,TGFBR3,THBS1,CDC42,AGRN
GO: Biological Process	GO:0006073	cellular glucan metabolic process		0.0007035	0.007062	9	90	PGM1,UBA52,UGP2,PPP1CB,PTGES3,IL6ST,GAA,PYGB,CALM1
GO: Biological Process	GO:0032091	negative regulation of protein binding		0.0007035	0.007062	9	90	PARK7,HSPA5,ANXA2,SLPI,B2M,ACE,PTPRF,CRTAC1,TMBIM6
GO: Biological Process	GO:0044042	glucan metabolic process		0.0007035	0.007062	9	90	PGM1,UBA52,UGP2,PPP1CB,PTGES3,IL6ST,GAA,PYGB,CALM1
GO: Biological Process	GO:0043207	response to external biotic stimulus		0.0007088	0.00708	44	986	CFL1,REG3G,MDH1,PGC,IGLL5,ADH5,UBA52,CLU,SPON2,PLA2G2A,ALAD,BAIAP2,HSPB1,SEMG1,SEMG2,ANG,FN1,ANXA3,ANXA5,NPC2,APP,KLK3,CCT5,SLPI,FUCA2,DNAJC3,ERAP1,PSMA2,B2M,ACE,RAB1A,ITCH,CAMP,MUC5B,PRDX2,LCN2,GSTP1,EEF1G,CD14,TSPAN6,LTF,LYZ,ENO1,SPACA3
GO: Biological Process	GO:0051707	response to other organism		0.0007088	0.00708	44	986	CFL1,REG3G,MDH1,PGC,IGLL5,ADH5,UBA52,CLU,SPON2,PLA2G2A,ALAD,BAIAP2,HSPB1,SEMG1,SEMG2,ANG,FN1,ANXA3,ANXA5,NPC2,APP,KLK3,CCT5,SLPI,FUCA2,DNAJC3,ERAP1,PSMA2,B2M,ACE,RAB1A,ITCH,CAMP,MUC5B,PRDX2,LCN2,GSTP1,EEF1G,CD14,TSPAN6,LTF,LYZ,ENO1,SPACA3
GO: Biological Process	GO:0002429	immune response-activating cell surface receptor signaling pathway		0.000709	0.00708	20	332	ACTB,IGLL5,UBA52,BAIAP2,HSP90AA1,HSP90AB1,EZR,PSMA2,PSMA4,PSMA5,PSMA6,PSMB1,PSMB2,PSMB3,PSMC3,PSMC4,PSMD5,PSME1,CD38,CDC42
GO: Biological Process	GO:0006953	acute-phase response		0.0007252	0.007222	7	56	REG3G,SERPINA1,SERPINF2,FN1,APCS,ORM1,ORM2
GO: Biological Process	GO:0090670	RNA localization to Cajal body		0.0007281	0.007222	4	16	CCT2,RUVBL1,CCT5,CCT6A
GO: Biological Process	GO:0090672	telomerase RNA localization		0.0007281	0.007222	4	16	CCT2,RUVBL1,CCT5,CCT6A
GO: Biological Process	GO:0090671	telomerase RNA localization to Cajal body		0.0007281	0.007222	4	16	CCT2,RUVBL1,CCT5,CCT6A
GO: Biological Process	GO:0001869	negative regulation of complement activation, lectin pathway		0.0007428	0.007263	2	2	A2M,SERPING1
GO: Biological Process	GO:0001868	regulation of complement activation, lectin pathway		0.0007428	0.007263	2	2	A2M,SERPING1
GO: Biological Process	GO:0046294	formaldehyde catabolic process		0.0007428	0.007263	2	2	ESD,ADH5
GO: Biological Process	GO:0031437	regulation of mRNA cleavage		0.0007428	0.007263	2	2	HSPA1A,TMBIM6
GO: Biological Process	GO:2000397	positive regulation of ubiquitin-dependent endocytosis		0.0007428	0.007263	2	2	TSG101,VPS28
GO: Biological Process	GO:2000395	regulation of ubiquitin-dependent endocytosis		0.0007428	0.007263	2	2	TSG101,VPS28
GO: Biological Process	GO:1904720	regulation of mRNA endonucleolytic cleavage involved in unfolded protein response		0.0007428	0.007263	2	2	HSPA1A,TMBIM6
GO: Biological Process	GO:0061740	protein targeting to lysosome involved in chaperone-mediated autophagy		0.0007428	0.007263	2	2	HSPA8,LAMP2
GO: Biological Process	GO:0006739	NADP metabolic process		0.0007435	0.007263	6	41	PGAM1,PGD,PGLS,PRDX5,IDH1,TPI1
GO: Biological Process	GO:0032870	cellular response to hormone stimulus		0.0007754	0.007558	33	677	PARK7,SERPINF1,UCHL3,AGT,MMP2,BAIAP2,PLOD1,FN1,ADAMTS1,ANXA1,ANXA5,APRT,YWHAG,YWHAH,PLPP1,PRCP,PRKAR2A,CTSB,CTSH,PTGES3,CTSL,ATP6V1A,RAB10,PTPRF,GNB1,GNB2,GOT1,CA2,PLOD3,CALR,GSTP1,NAMPT,LMO2
GO: Biological Process	GO:0009991	response to extracellular stimulus		0.0007763	0.007558	31	622	AOC1,PARK7,LIPG,PKM,ALAD,ALB,HSPA5,HSPA8,ADAMTS1,CP,APOA1,CARTPT,ARSA,RUVBL1,SOD1,SORD,ATP6V1A,GAPDH,GC,PTN,QSOX1,RAB7A,DSC2,LDHA,PDIA3,GSN,GSS,GSTP1,EEF2,RNASE4,FSTL1
GO: Biological Process	GO:0072657	protein localization to membrane		0.0007955	0.007732	27	515	RPLP1,UBA52,PIGR,SDCBP,HSP90AA1,EZR,ANXA2,AGR2,CPE,YWHAB,YWHAE,YWHAG,YWHAH,YWHAZ,RAB11A,TMBIM1,PTN,RAB10,F11R,KIF5B,YWHAQ,SFN,LAMA5,GSN,MPP5,CDH1,AGRN
GO: Biological Process	GO:0050663	cytokine secretion		0.0007971	0.007735	14	194	AGT,ALOX15B,EZR,FN1,ANXA1,ANXA4,APOA1,RAB1A,PNP,CAMP,CD14,PAEP,LPL,IL1RL1
GO: Biological Process	GO:0051875	pigment granule localization		0.0008133	0.007865	5	28	MLPH,RAB11A,RAB1A,RAB27A,RAB27B
GO: Biological Process	GO:0051156	glucose 6-phosphate metabolic process		0.0008133	0.007865	5	28	PGAM1,PGD,PGLS,GPI,TPI1
GO: Biological Process	GO:0030193	regulation of blood coagulation		0.0008255	0.007957	9	92	SERPINF2,VTN,ANXA2,ANXA5,APOH,SERPING1,PRDX2,THBS1,TSPAN8
GO: Biological Process	GO:1900046	regulation of hemostasis		0.0008255	0.007957	9	92	SERPINF2,VTN,ANXA2,ANXA5,APOH,SERPING1,PRDX2,THBS1,TSPAN8
GO: Biological Process	GO:0071417	cellular response to organonitrogen compound		0.0008428	0.00811	27	517	HSP90B1,AOC1,UCHL3,AGT,MMP2,BAIAP2,EZR,ANXA5,APP,APRT,YWHAG,IGFBP5,PRKAR2A,SOD1,ATP6V1A,RAB10,PTPRF,GLRA2,GNB1,GNB2,GOT1,CA2,RAP1B,GSTP1,NAMPT,IL1RL1,CDH1
GO: Biological Process	GO:0019941	modification-dependent protein catabolic process		0.0008467	0.008121	30	598	HSP90B1,PARK7,TSG101,DNAJB9,UBA52,UBA1,MVB12A,CLU,UBE2V2,UCHL3,HSPA5,SDCBP,VCP,HSP90AB1,VPS25,PSMA2,PSMA4,PSMA5,PSMA6,PSMB1,PSMB2,PSMB3,PSMC3,PSMC4,PSMD5,PSME1,OS9,ITCH,USP5,VPS28
GO: Biological Process	GO:1903827	regulation of cellular protein localization		0.0008467	0.008121	30	598	PARK7,TXN,HSP90AA1,HSP90AB1,EZR,AGR2,CCT2,APOD,YWHAB,YWHAE,YWHAG,YWHAH,YWHAZ,RUVBL1,CCT5,TMBIM1,IQGAP1,PTN,OS9,KIF5B,YWHAQ,NOV,SFN,NUCB1,LCP1,GSN,CCT6A,PRDX1,CDC42,CDH1
GO: Biological Process	GO:0097190	apoptotic signaling pathway		0.0008614	0.008248	31	626	PARK7,CLU,AGT,ITM2B,HSPA1A,HSPB1,HYOU1,YWHAB,YWHAE,YWHAG,YWHAH,YWHAZ,PPP2R1A,CTSH,SOD1,TMBIM1,YWHAQ,SFN,PNP,PDCD6,LAMP1,PRDX2,LCN2,TMBIM6,PDIA3,GSN,GSTP1,THBS1,CD14,P4HB,CD38
GO: Biological Process	GO:0009607	response to biotic stimulus		0.0008984	0.008588	45	1027	CFL1,REG3G,MDH1,PGC,IGLL5,ADH5,UBA52,CLU,SPON2,PLA2G2A,ALAD,BAIAP2,HSPA5,HSPB1,SEMG1,SEMG2,ANG,FN1,ANXA3,ANXA5,NPC2,APP,KLK3,CCT5,SLPI,FUCA2,DNAJC3,ERAP1,PSMA2,B2M,ACE,RAB1A,ITCH,CAMP,MUC5B,PRDX2,LCN2,GSTP1,EEF1G,CD14,TSPAN6,LTF,LYZ,ENO1,SPACA3
GO: Biological Process	GO:0050852	T cell receptor signaling pathway		0.0009289	0.008838	13	175	UBA52,EZR,PSMA2,PSMA4,PSMA5,PSMA6,PSMB1,PSMB2,PSMB3,PSMC3,PSMC4,PSMD5,PSME1
GO: Biological Process	GO:0010632	regulation of epithelial cell migration		0.0009289	0.008838	13	175	SERPINF1,PFN1,AGT,HSPB1,ANXA3,WNT7A,APOH,PRCP,CTSH,RAB11A,PDCD6,TGFBR3,THBS1
GO: Biological Process	GO:1903541	regulation of exosomal secretion		0.000932	0.008838	4	17	TSG101,SDCBP,RAB7A,PDCD6IP
GO: Biological Process	GO:1900120	regulation of receptor binding		0.000932	0.008838	4	17	ANXA2,B2M,PTPRF,CRTAC1
GO: Biological Process	GO:0006622	protein targeting to lysosome		0.000932	0.008838	4	17	HSPA8,GNPTG,RAB7A,LAMP2
GO: Biological Process	GO:0045766	positive regulation of angiogenesis		0.0009445	0.008942	11	133	DDAH1,LRG1,HSPB1,ANXA3,CTSH,ERAP1,C3,PDCD6,CAMP,ECM1,THBS1
GO: Biological Process	GO:0061028	establishment of endothelial barrier		0.0009634	0.009105	6	43	EZR,WNT7A,F11R,PTPRS,RAB1A,RAP1B
GO: Biological Process	GO:0044242	cellular lipid catabolic process		0.0009722	0.009174	14	198	HEXA,HEXB,LIPG,APOA1,IDH1,APOH,SMPD1,DBI,NEU1,GLA,SMPDL3A,RAB7A,GM2A,LPL
[truncated: 5,205 more rows]
